# Supplementary material for: A Comprehensive Atlas of Immunological Differences Between Humans, Mice, and Non-Human Primates
Source: PubMed Central journal article supplement (PMC8962947; doi:10.3389/fimmu.2022.867015), 2022-03-11

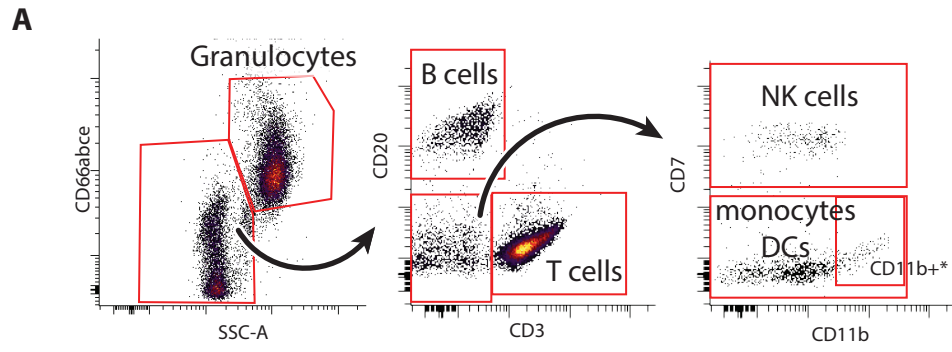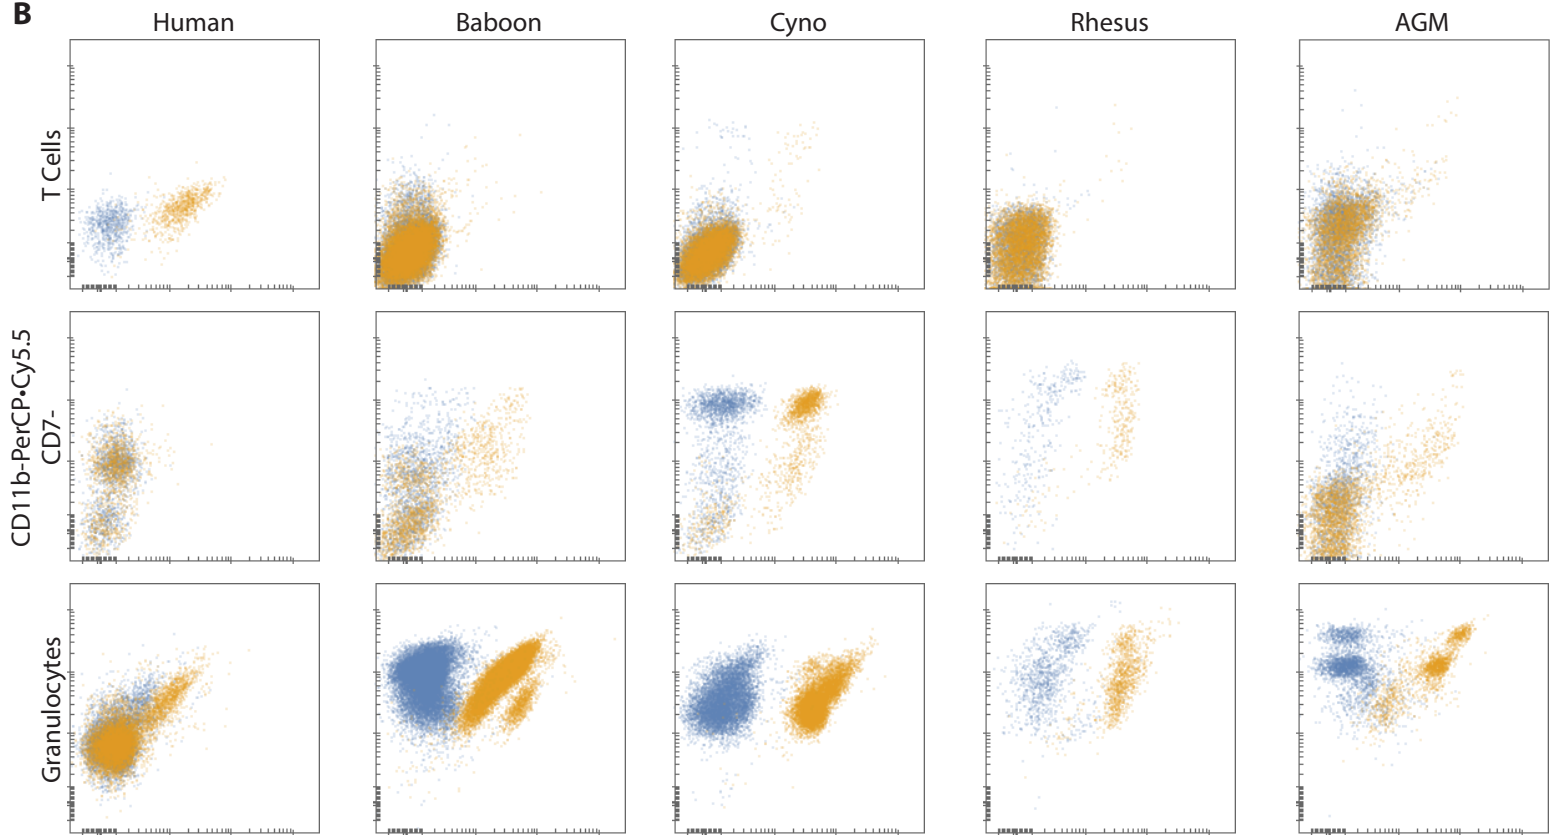

CD172g-PE or isotype control-PE

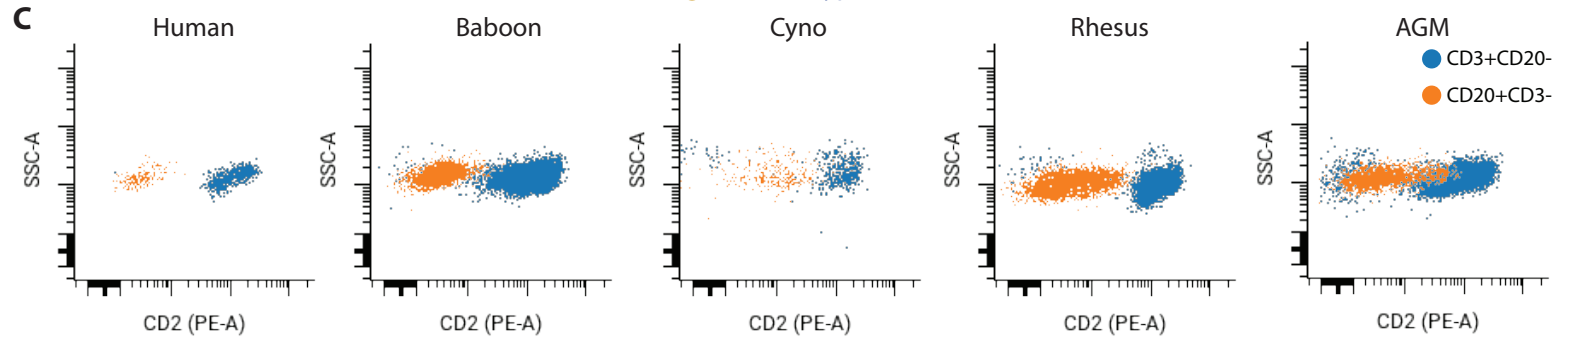

Supplement: DataSheet_1.pdf [file DataSheet_1.pdf]
