# Supplementary material for: A Comprehensive Atlas of Immunological Differences Between Humans, Mice, and Non-Human Primates
Source: PubMed Central journal article supplement (PMC8962947; doi:10.3389/fimmu.2022.867015), 2022-03-11

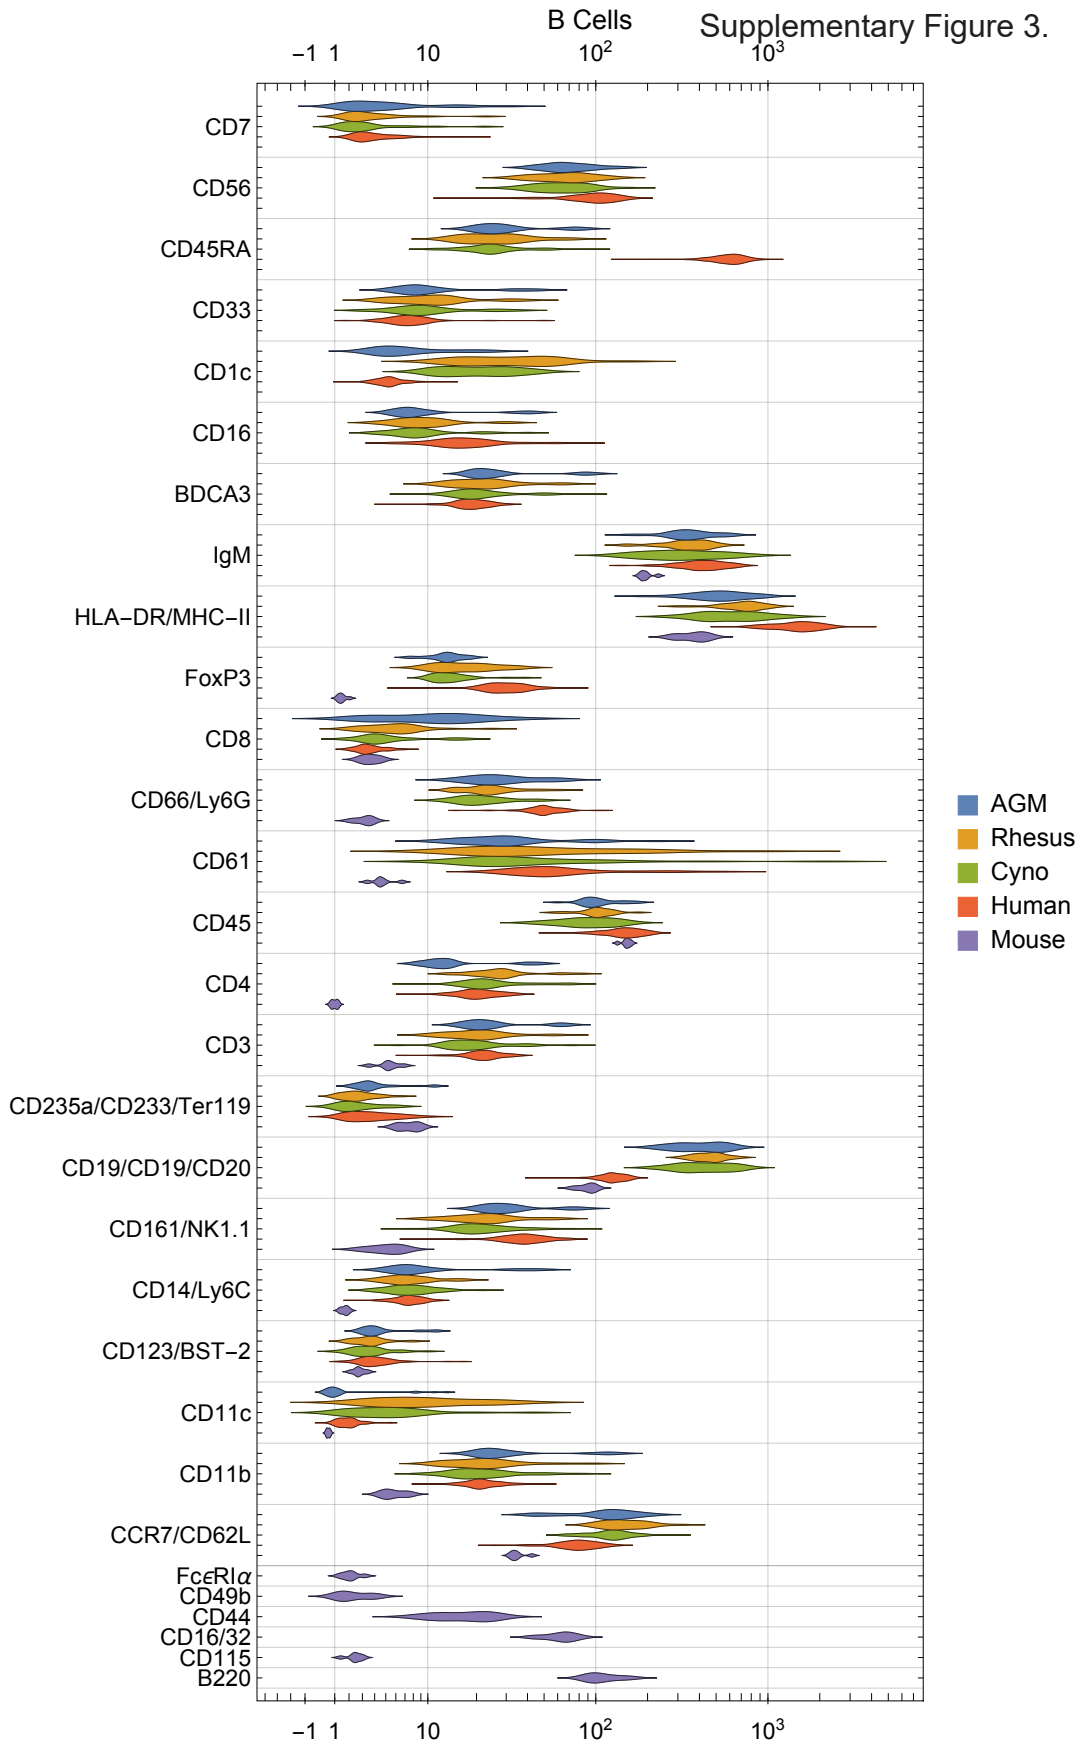

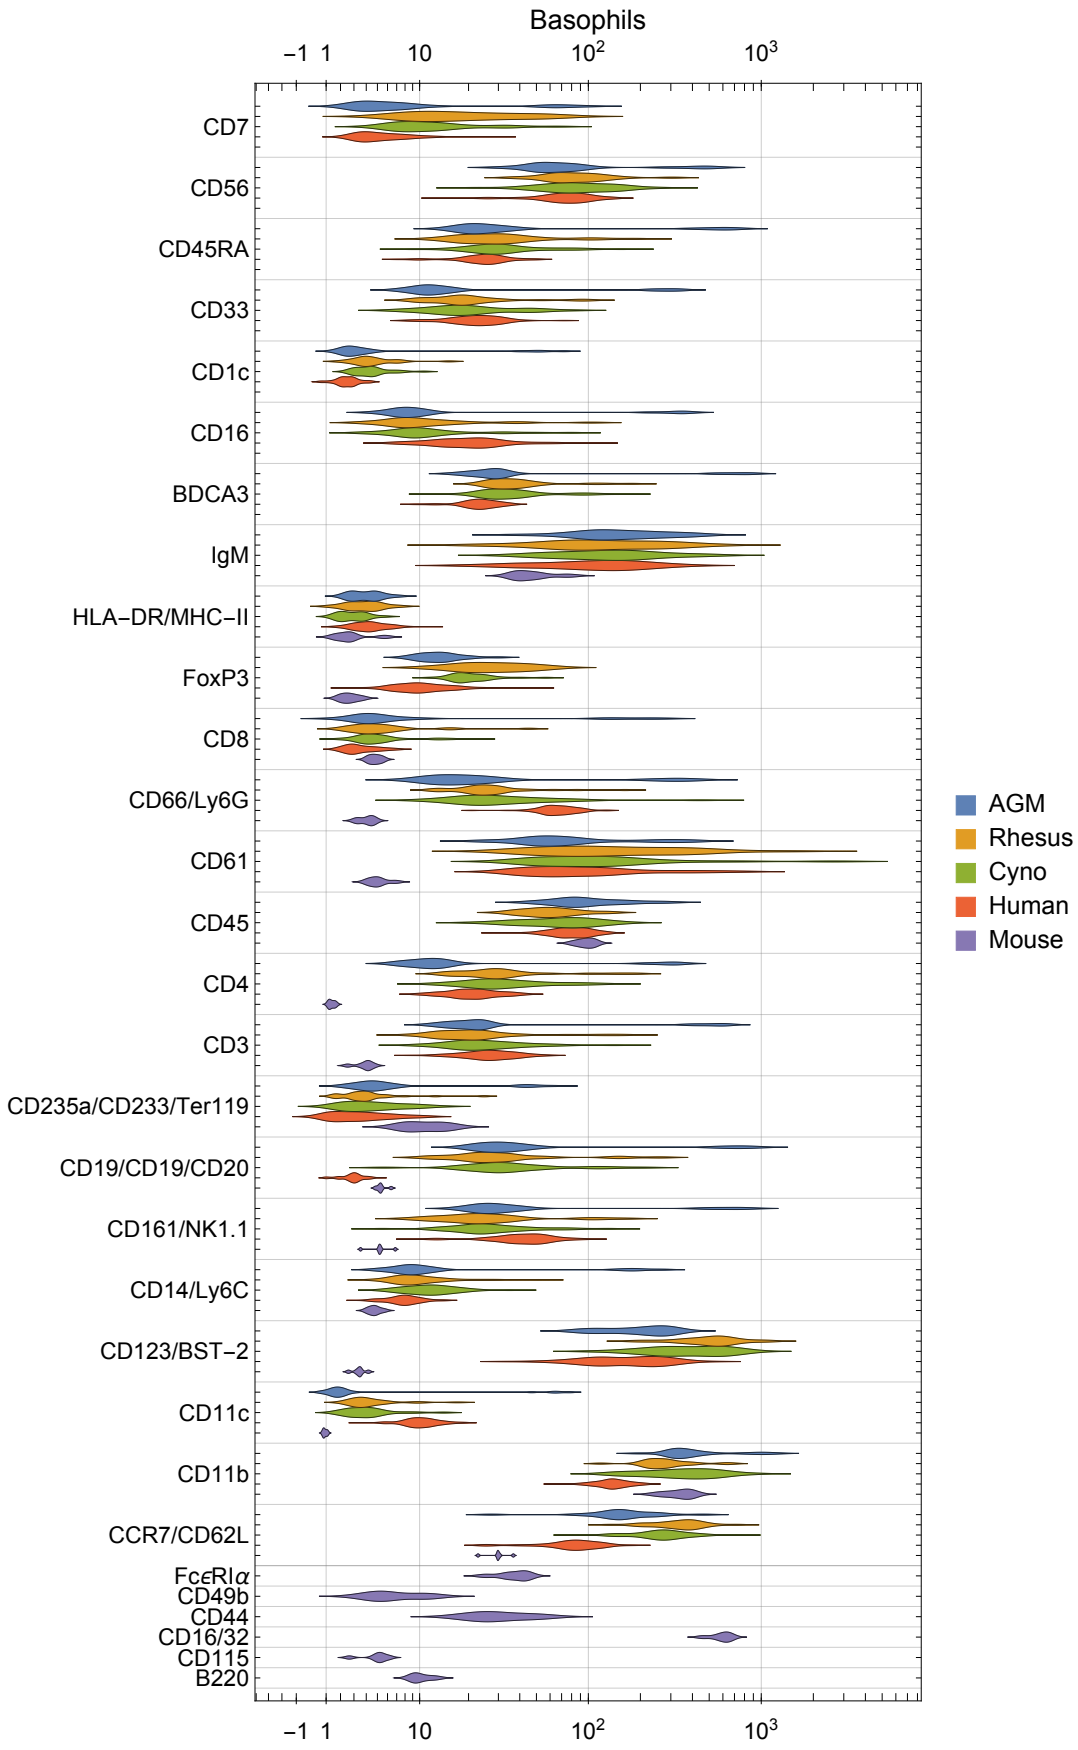

# CD4+ T Cells

-1 1 10 10<sup>2</sup> 10<sup>3</sup>

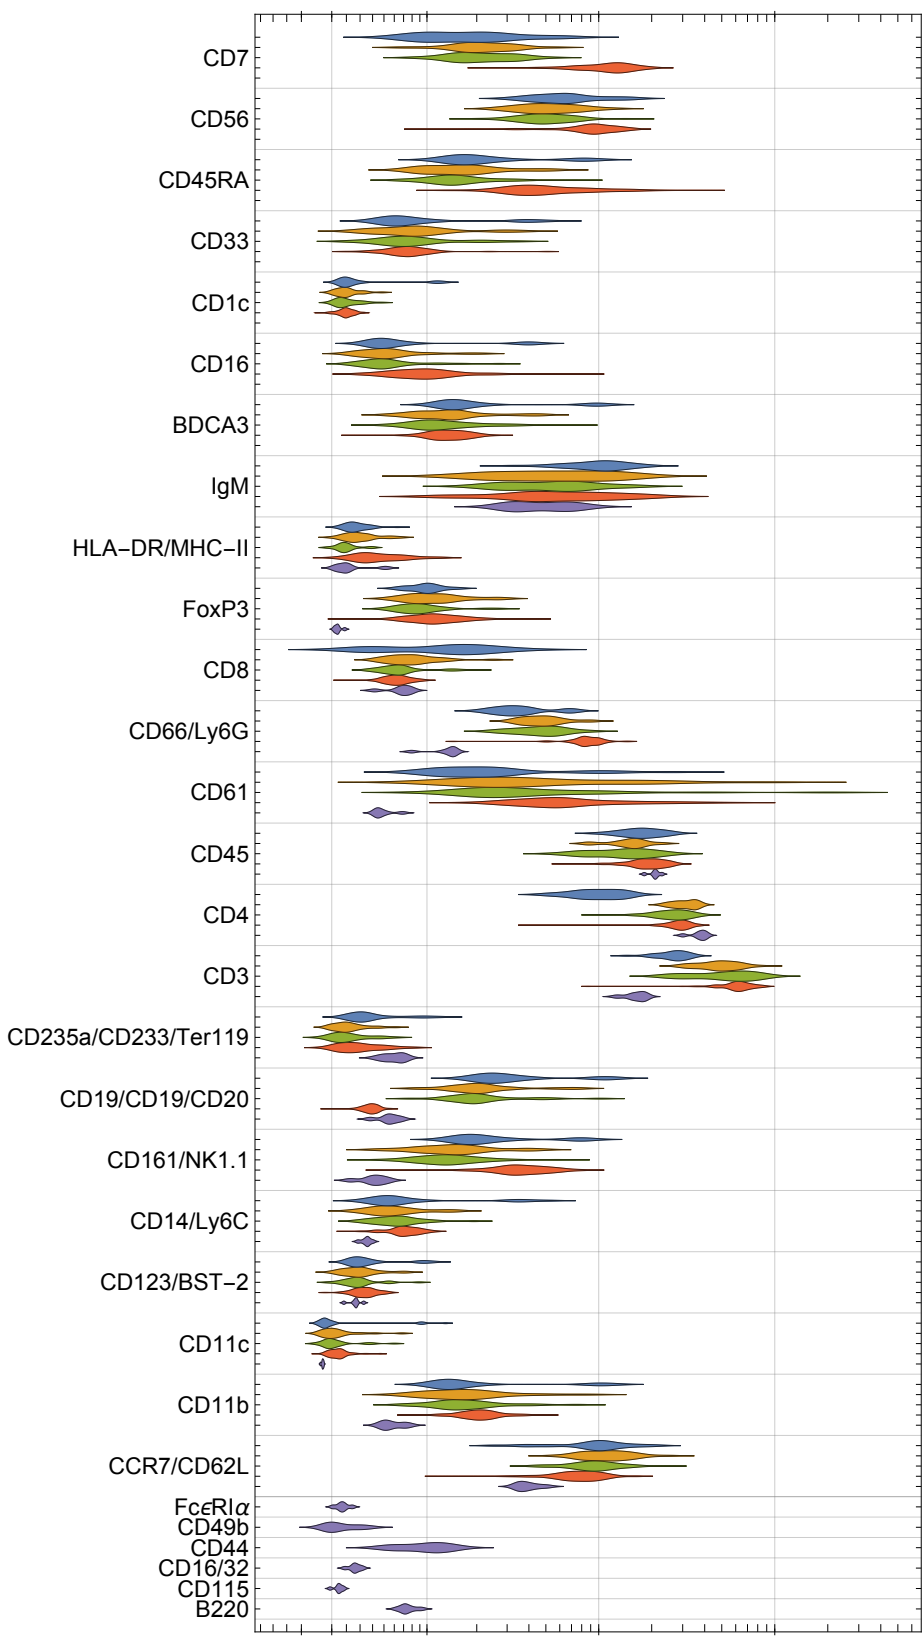

- AGM
- Rhesus
- Cyno
- Human
- Mouse

-1 1 10 10<sup>2</sup> 10<sup>3</sup>

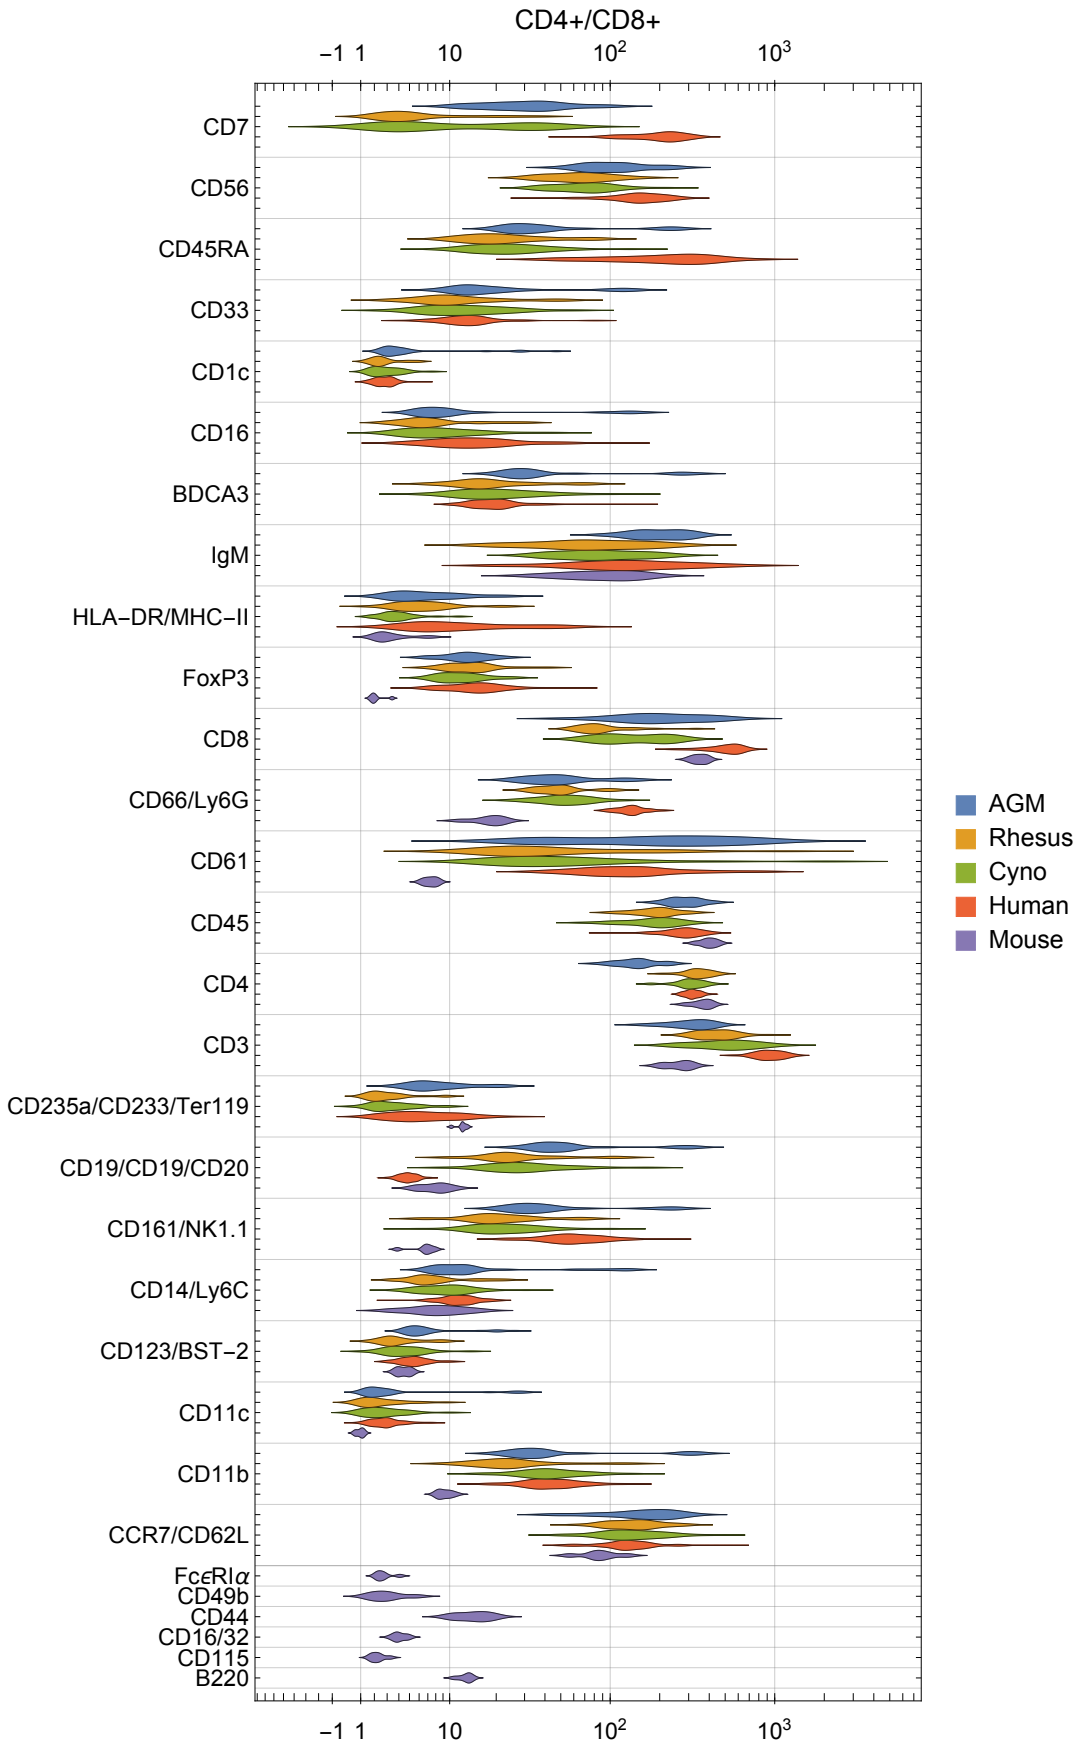

CD8+ T Cells

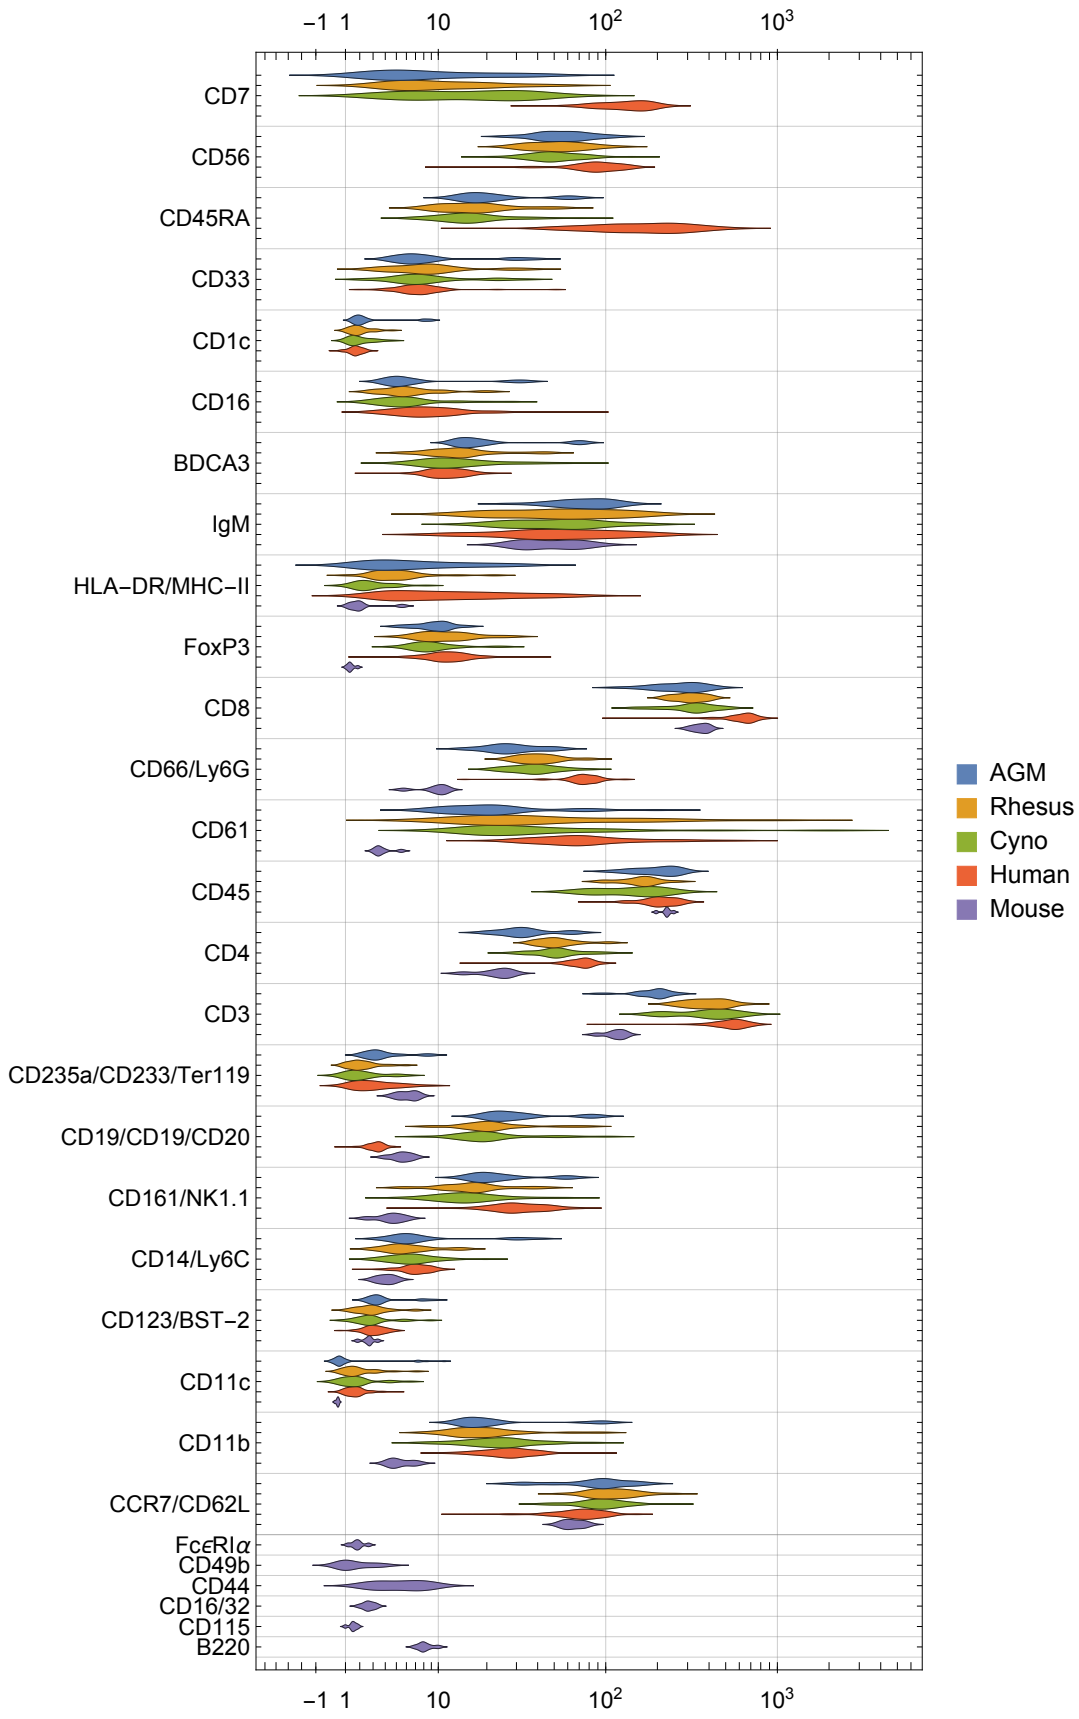

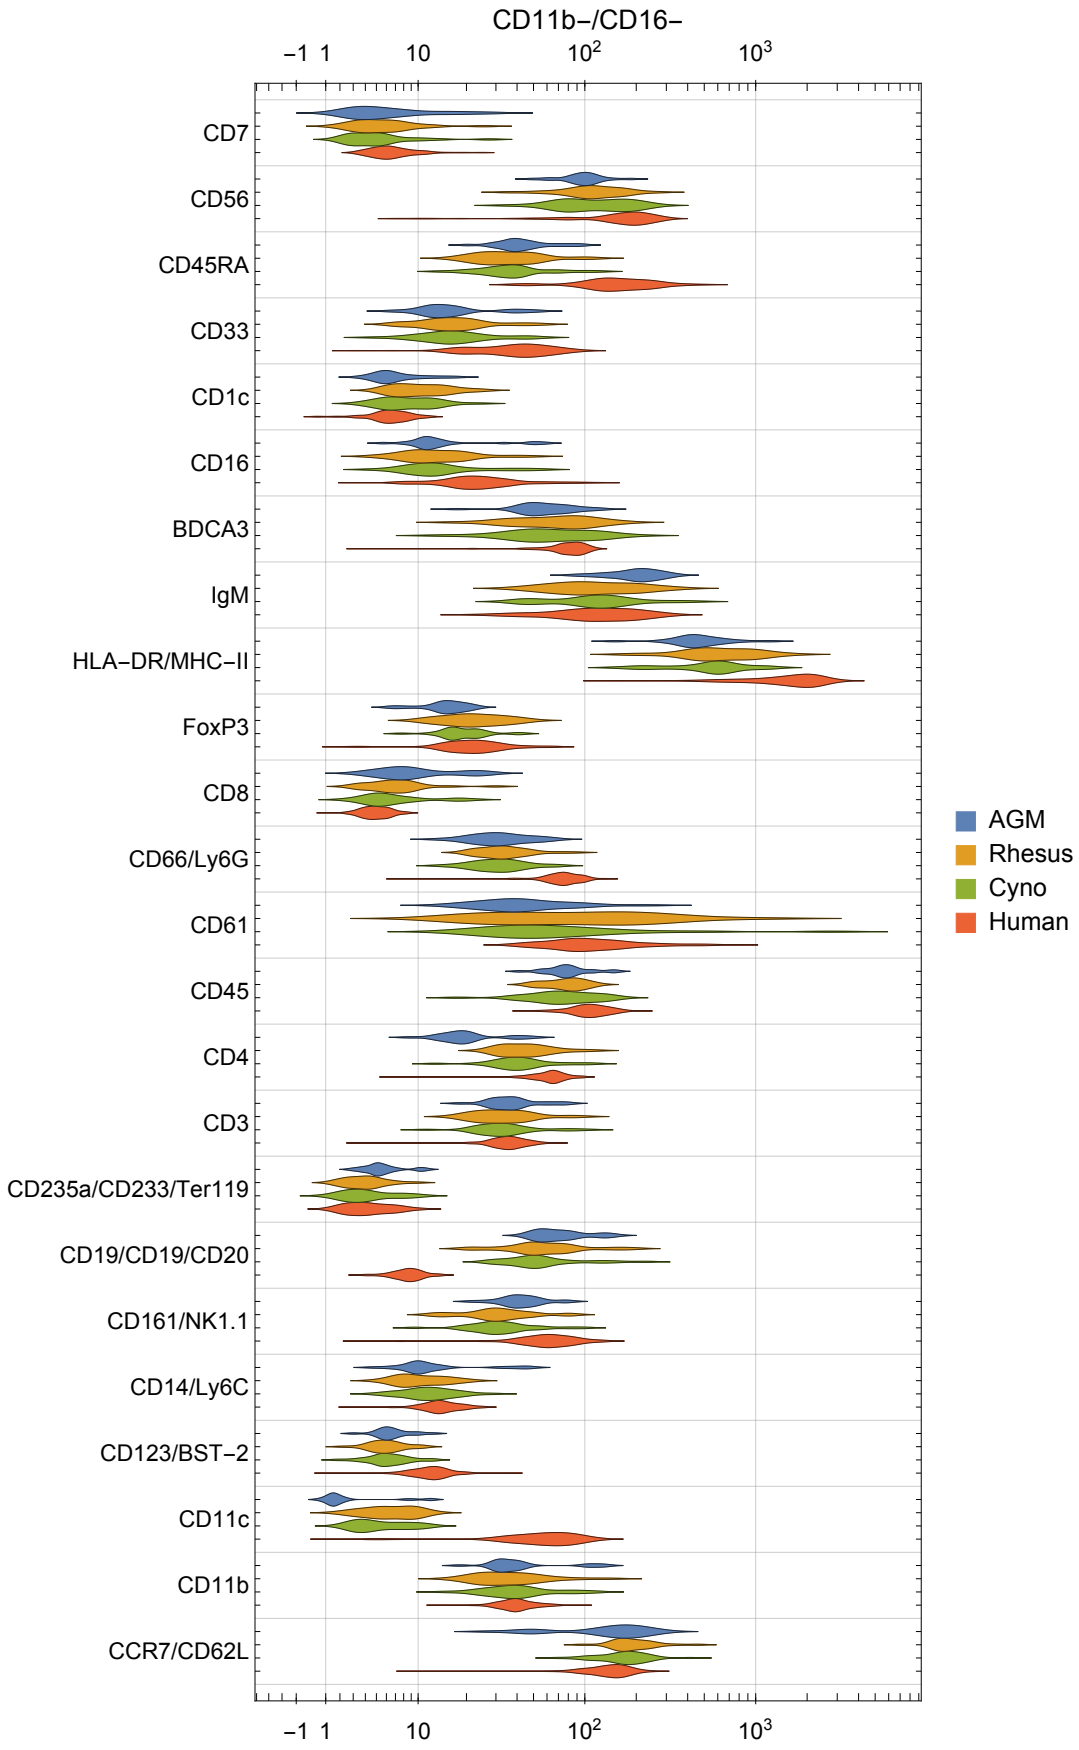

# Classical Monocytes

-1 1 10 10<sup>2</sup> 10<sup>3</sup>

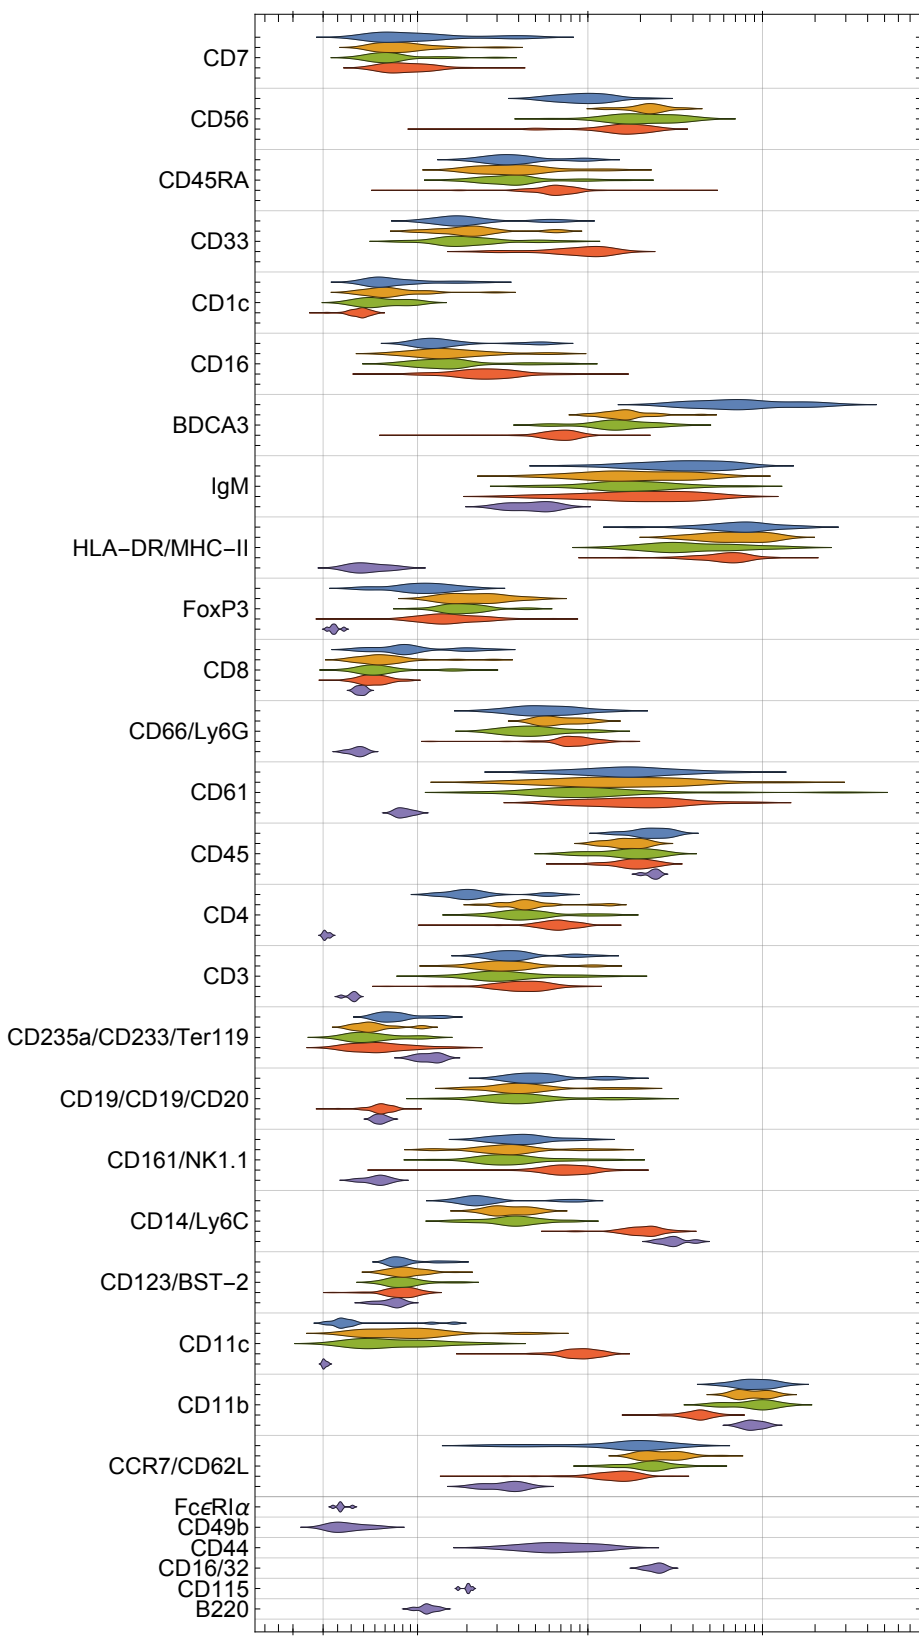

■ AGM  
■ Rhesus  
■ Cyno  
■ Human  
■ Mouse

-1 1 10 10<sup>2</sup> 10<sup>3</sup>

# Intermediate Monocytes

-1 1 10 10<sup>2</sup> 10<sup>3</sup>

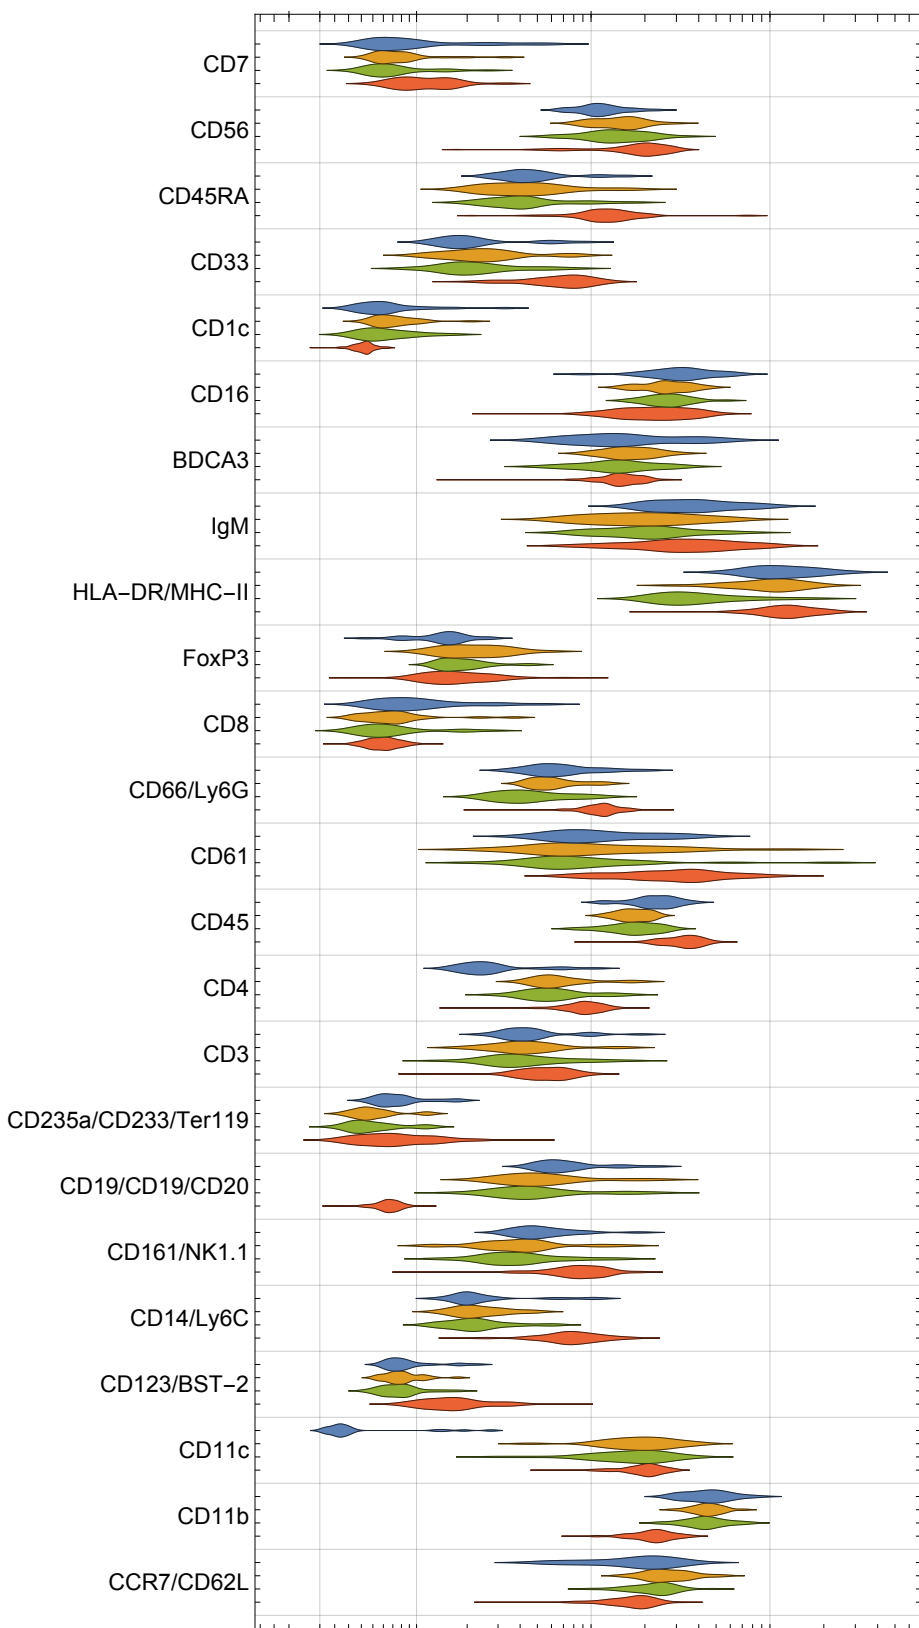

■ AGM  
■ Rhesus  
■ Cyno  
■ Human

-1 1 10 10<sup>2</sup> 10<sup>3</sup>



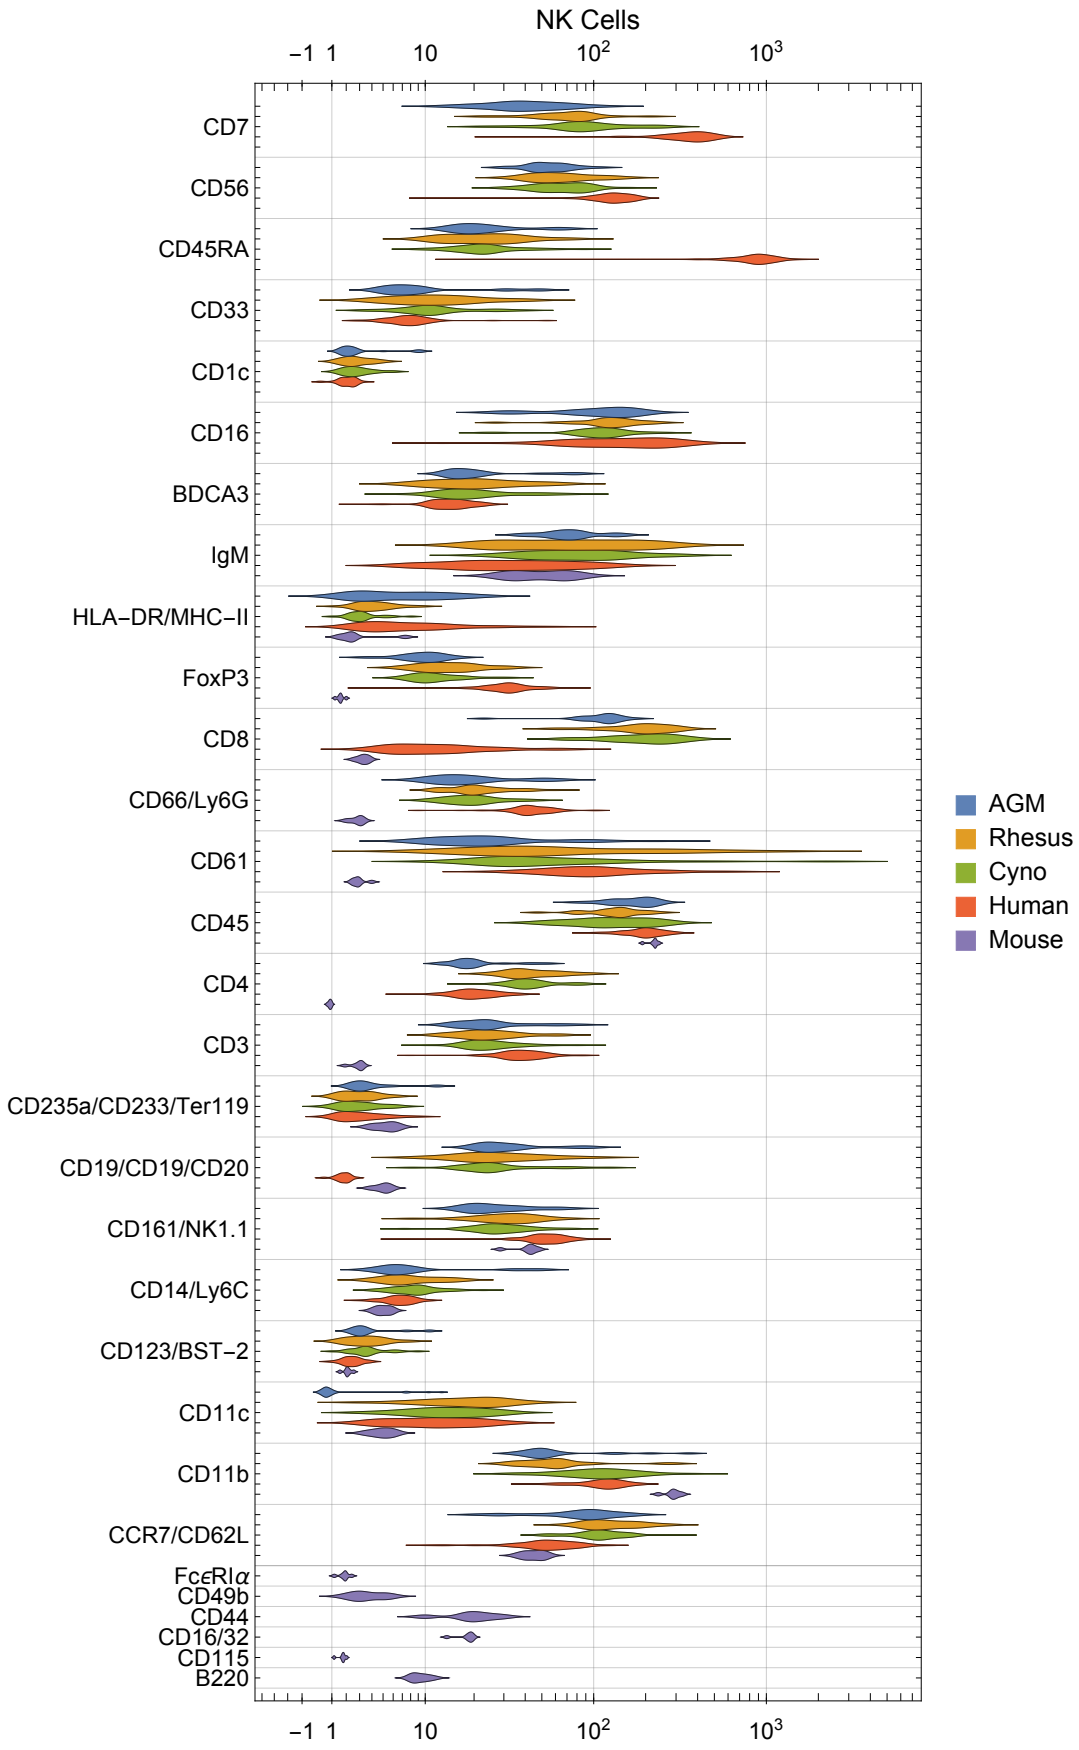

# Nonclassical Monocytes

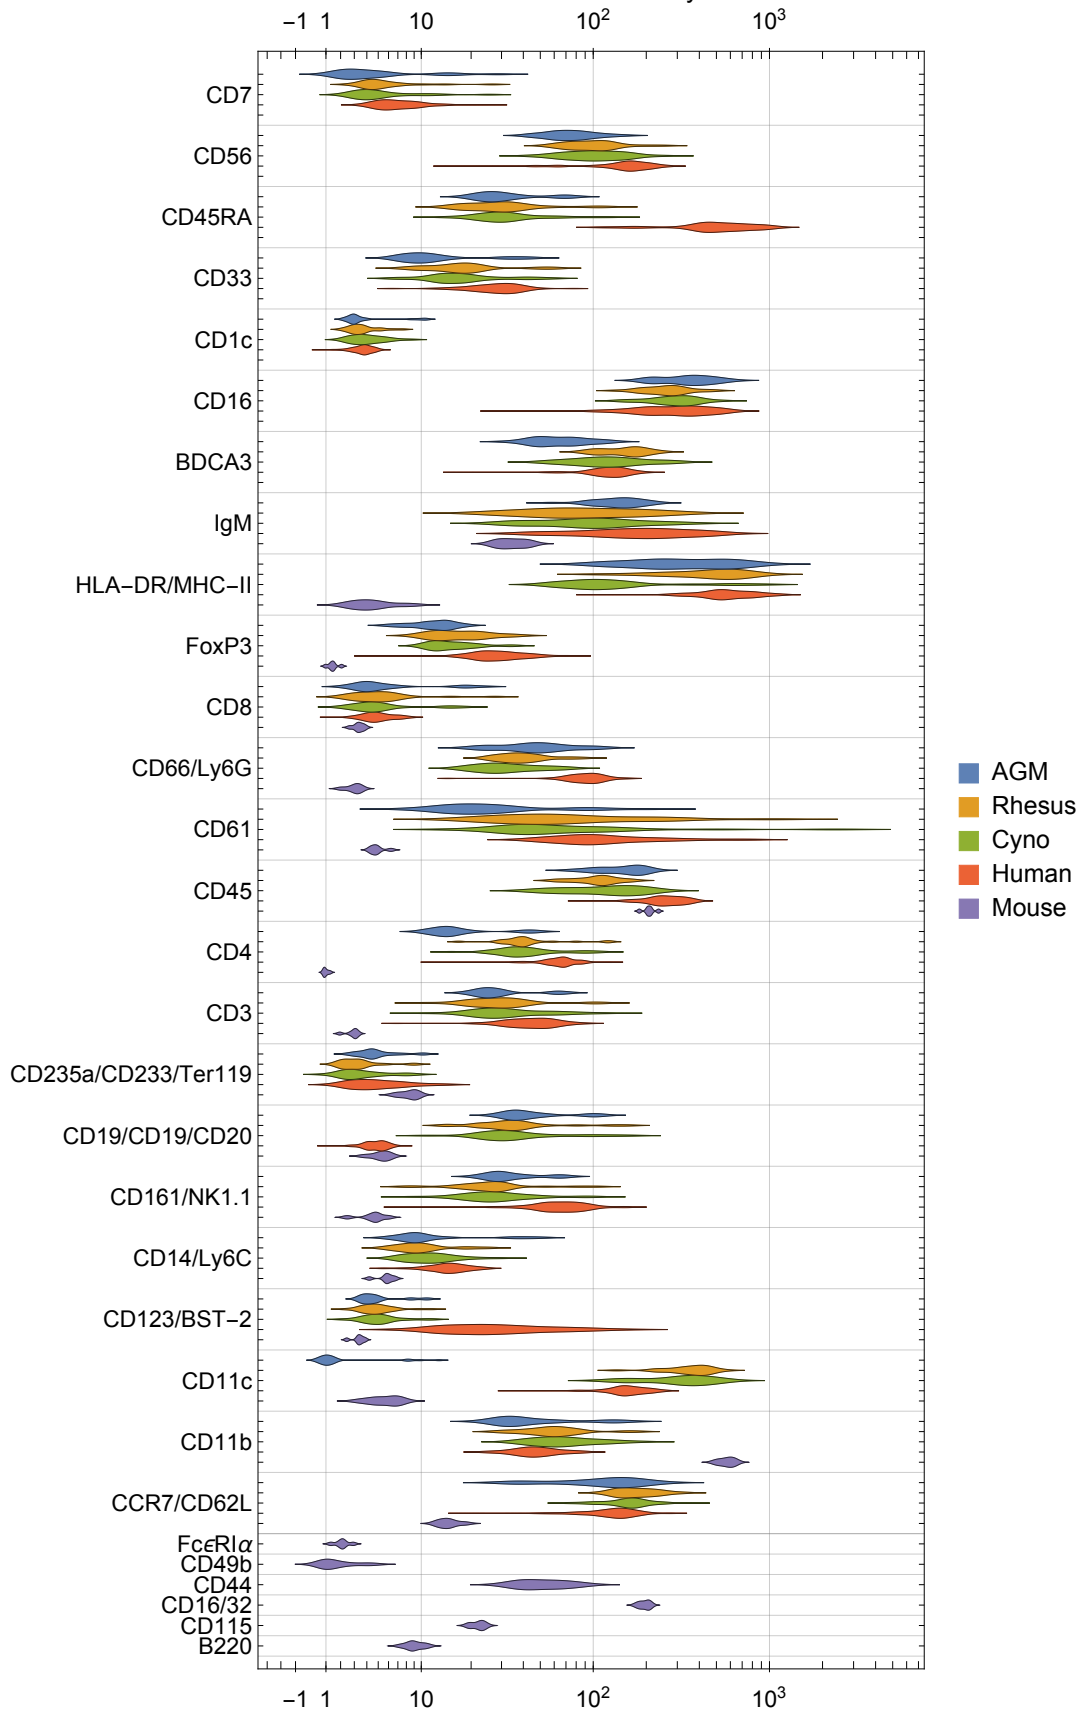

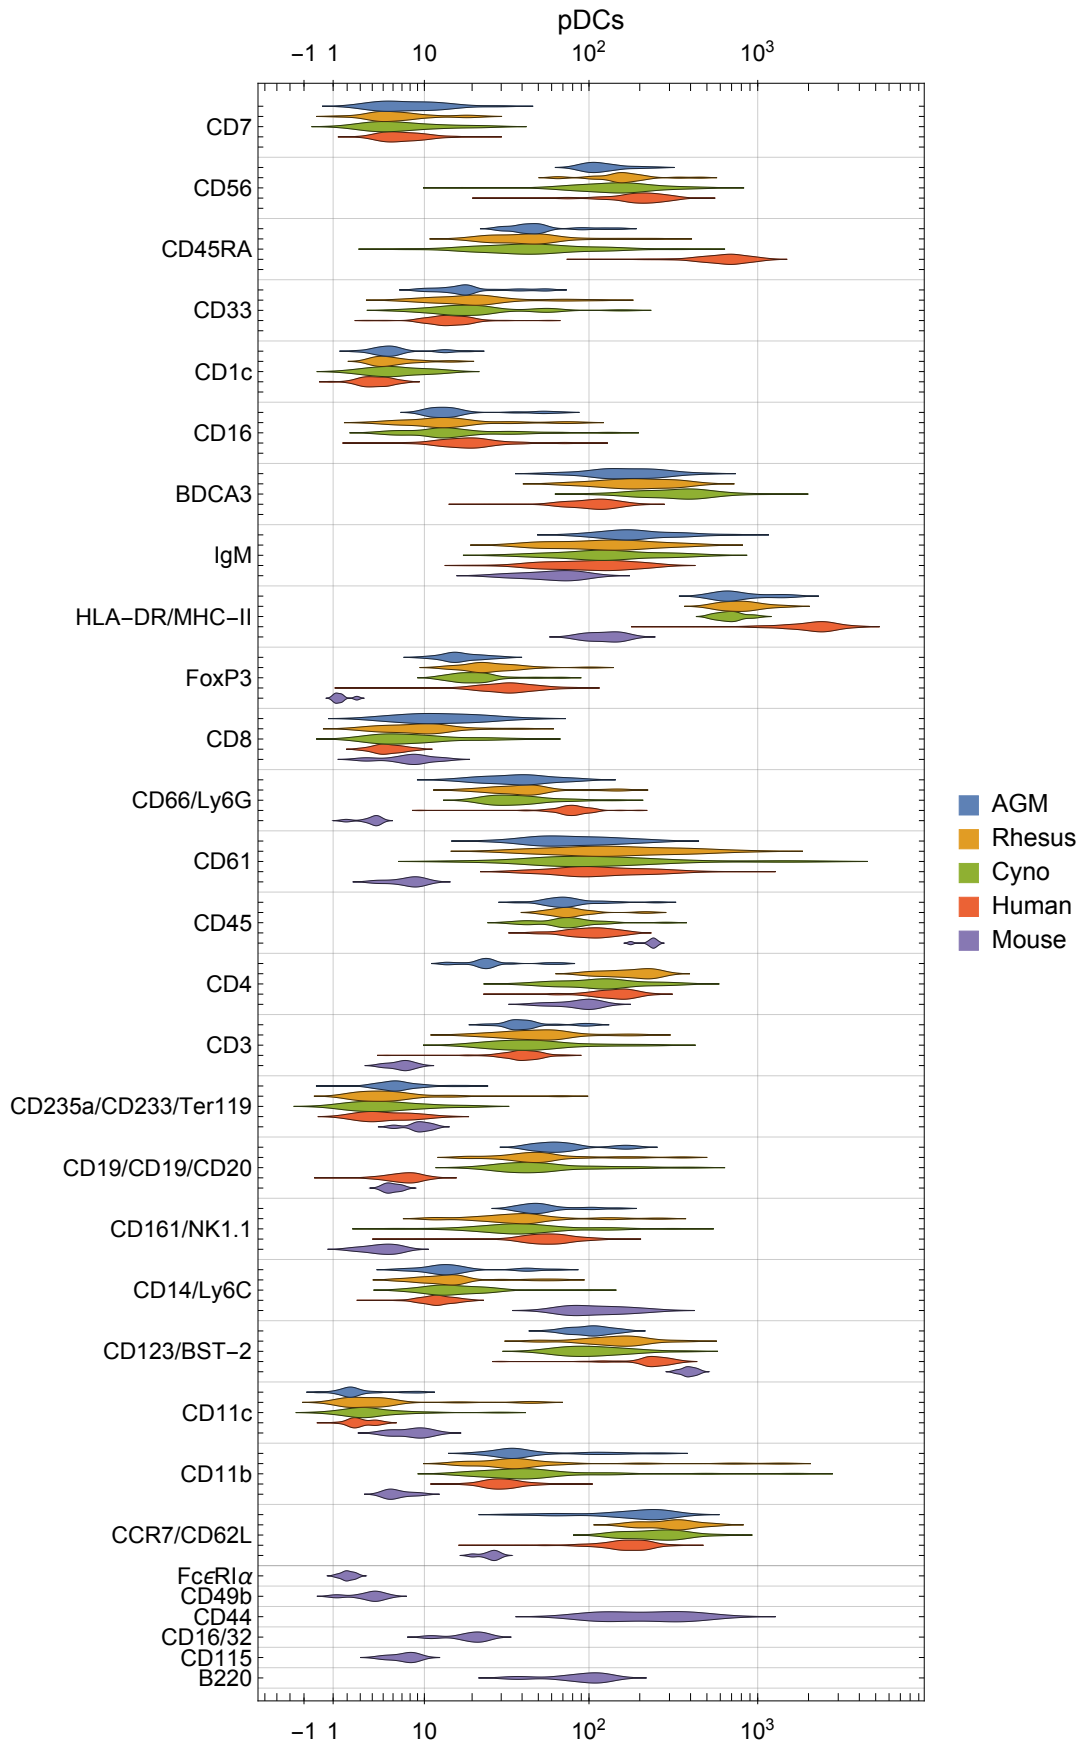

Supplement: DataSheet_3.pdf [file DataSheet_3.pdf]
