# Supplementary material for: A Comprehensive Atlas of Immunological Differences Between Humans, Mice, and Non-Human Primates
Source: PubMed Central journal article supplement (PMC8962947; doi:10.3389/fimmu.2022.867015), 2022-03-11
Supplement: DataSheet_4.pdf [file DataSheet_4.pdf]

## B Cells

## Supplementary Figure 4.

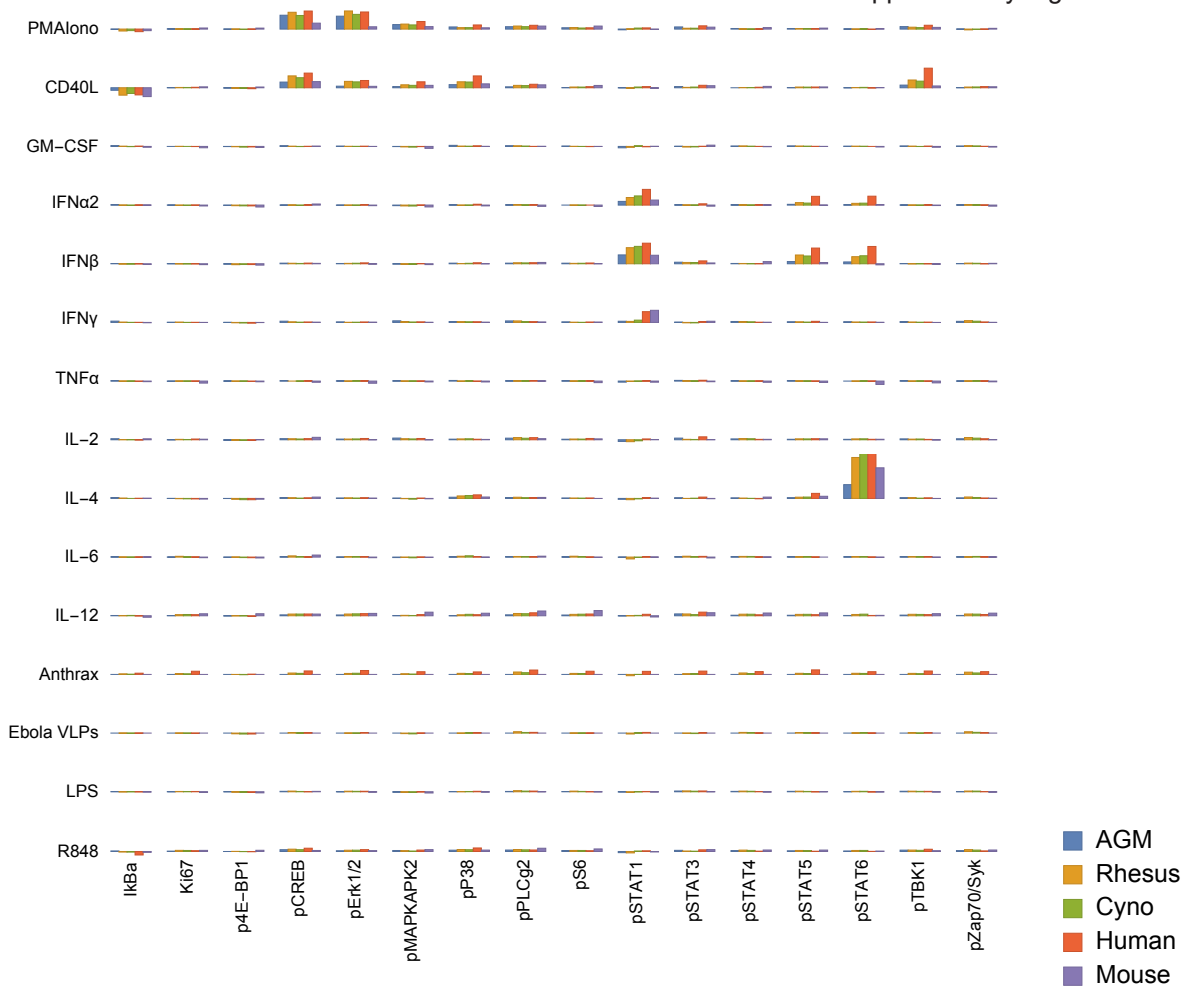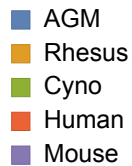











# Intermediate Monocytes

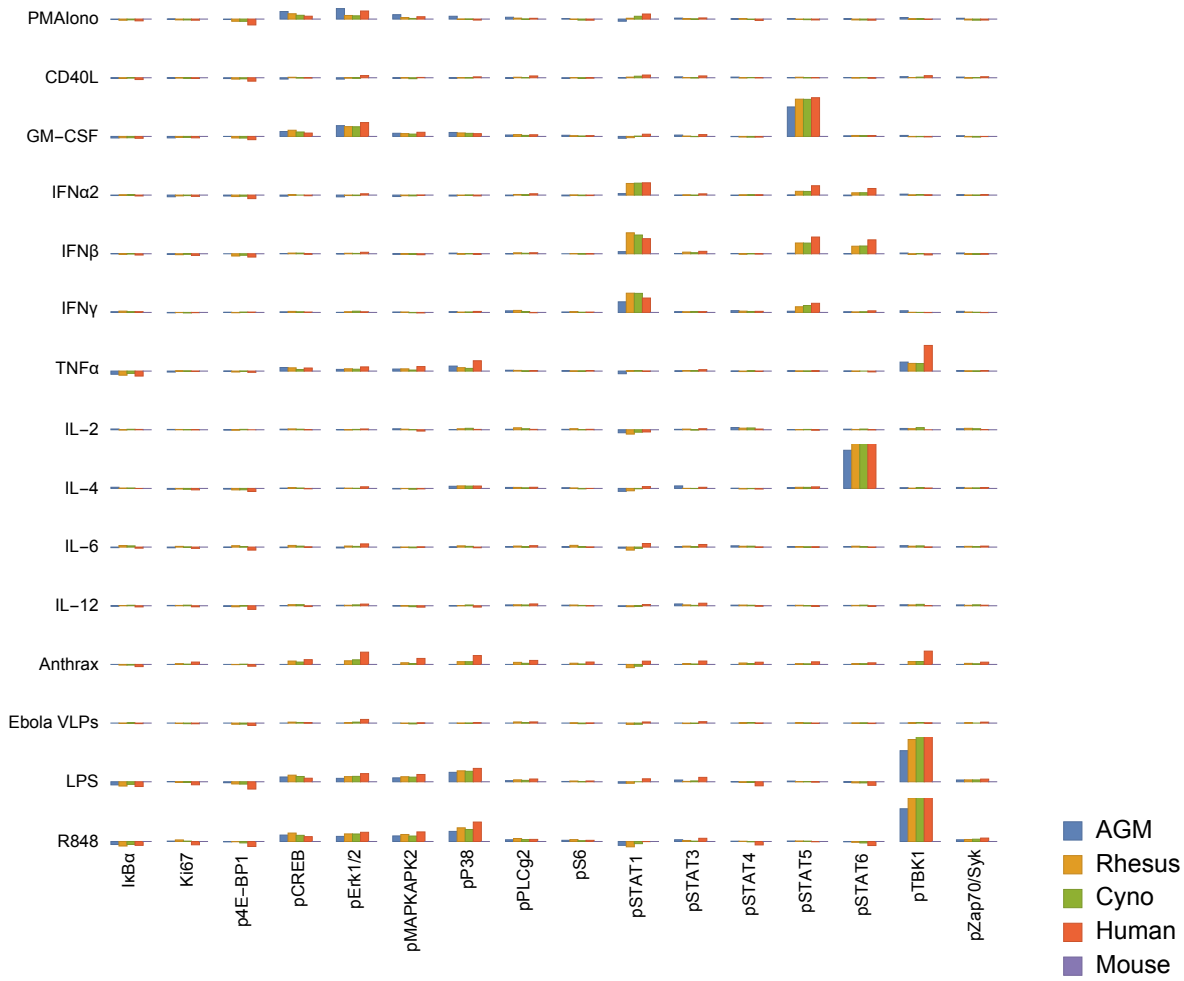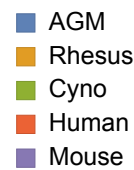

# Neutrophils

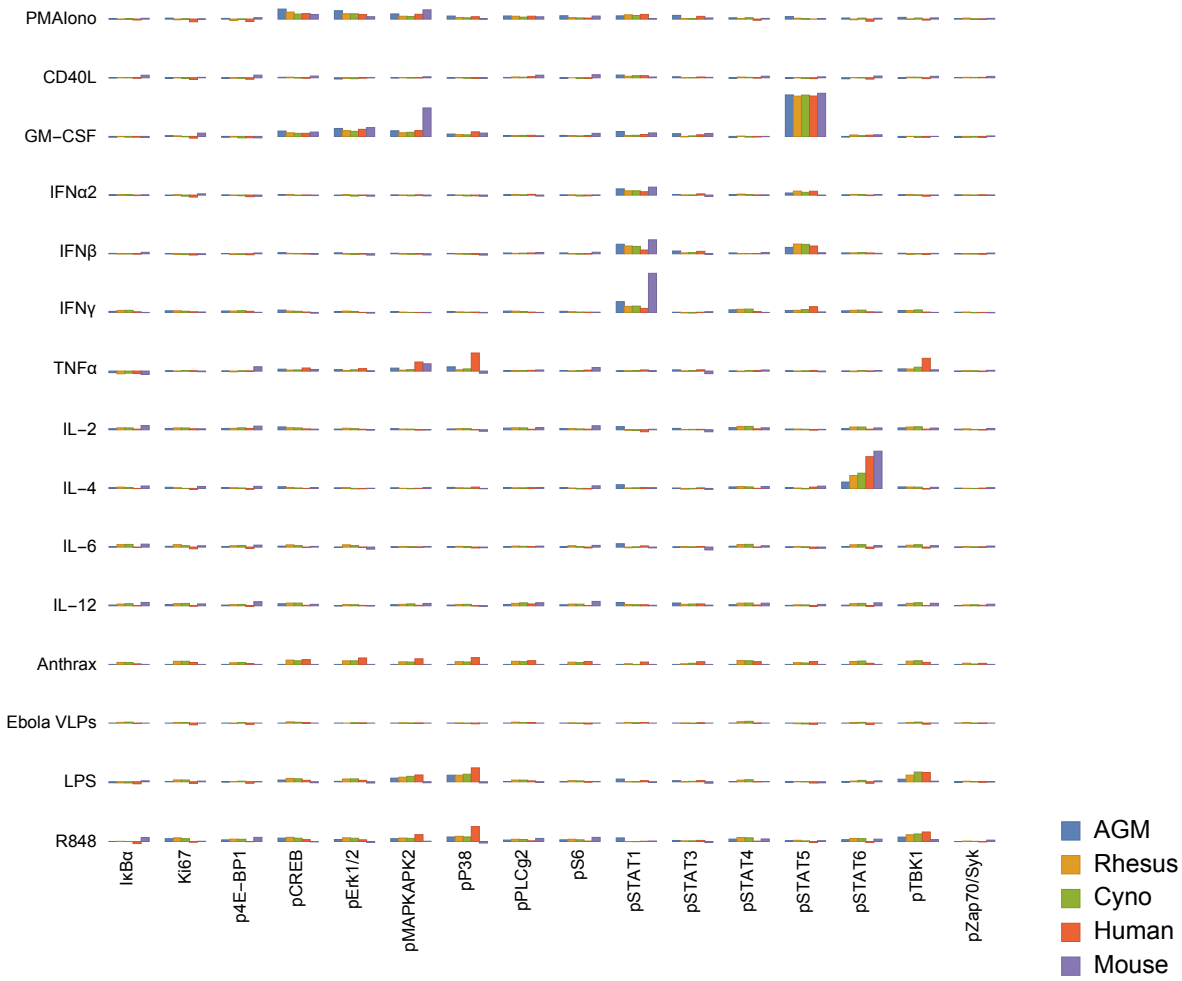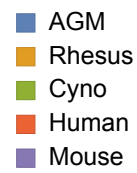



# NK Cells

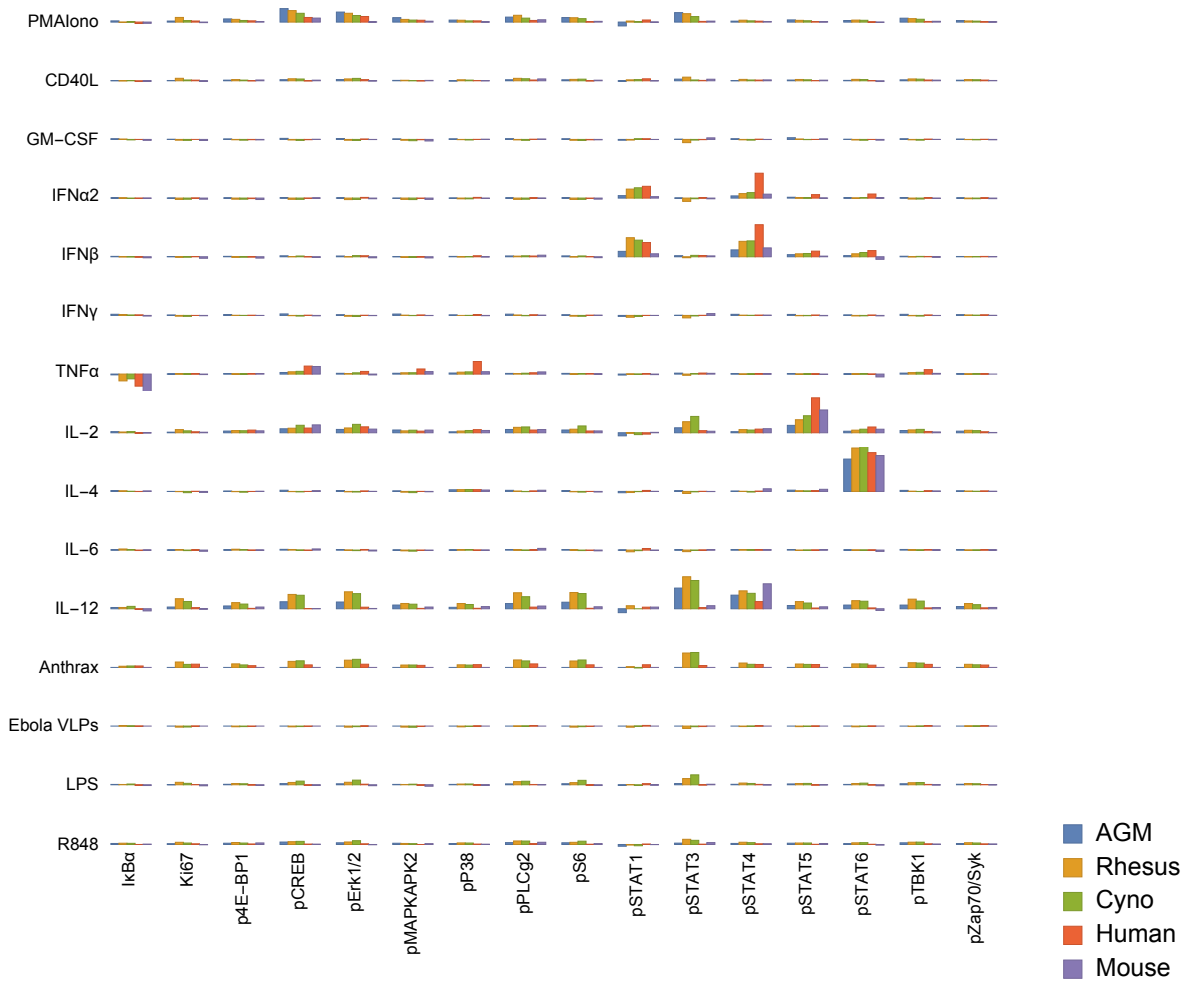

# Nonclassical Monocytes

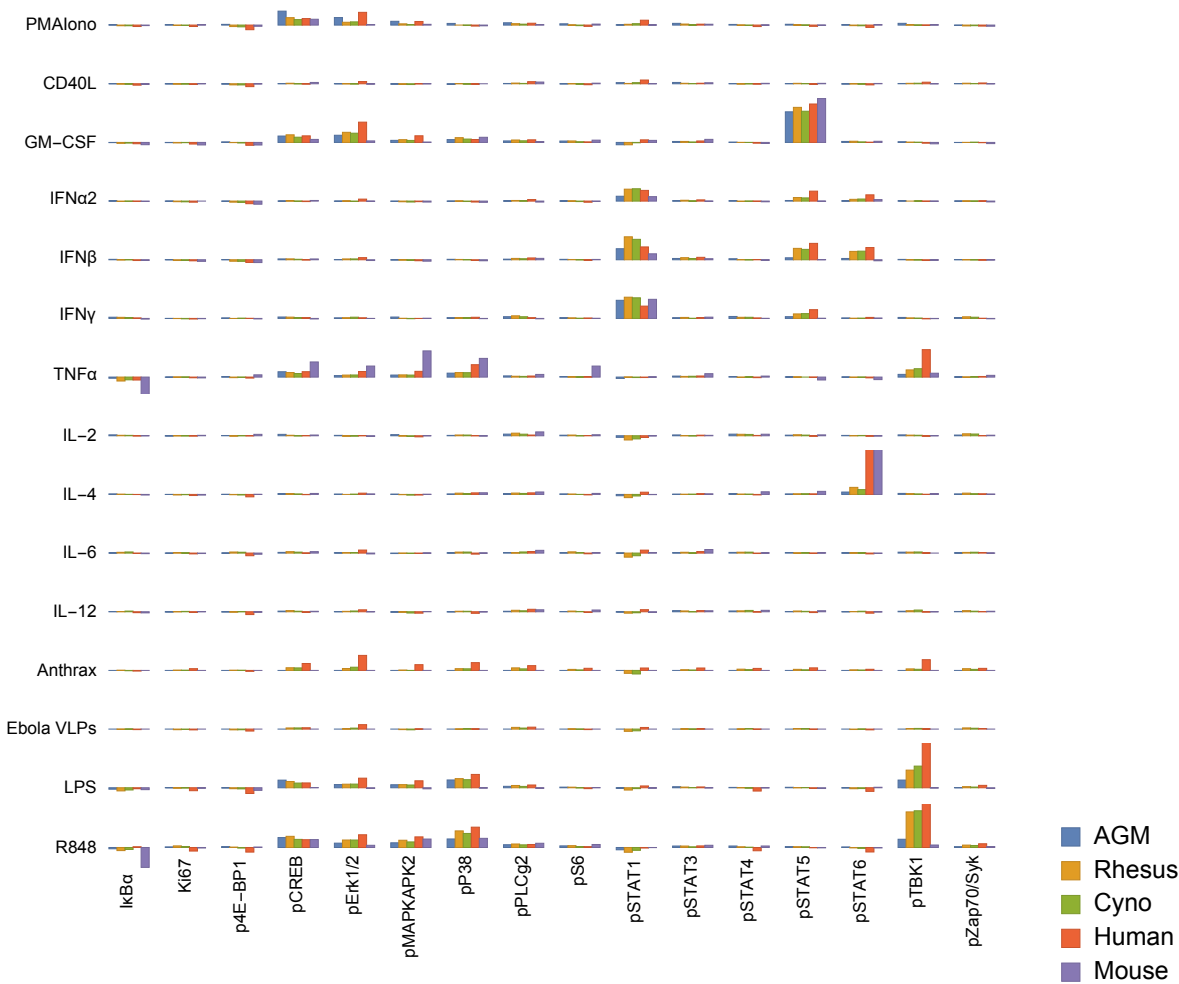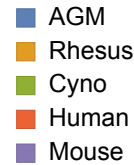

pDCs

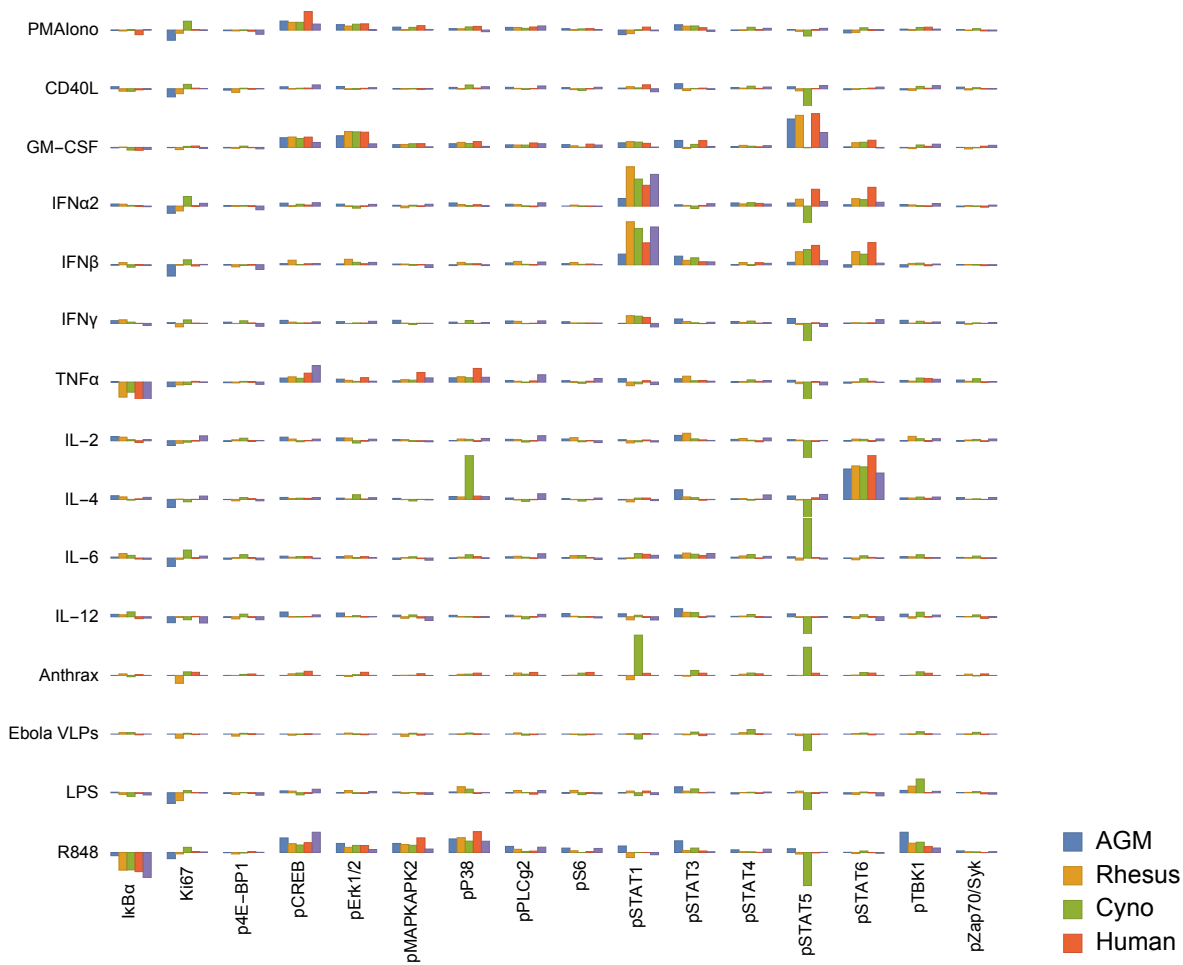

- AGM
- Rhesus
- Cyno
- Human
- Mouse
