# Supplementary material for: A Comprehensive Atlas of Immunological Differences Between Humans, Mice, and Non-Human Primates
Source: PubMed Central journal article supplement (PMC8962947; doi:10.3389/fimmu.2022.867015), 2022-03-11
Supplement: DataSheet_5.pdf [file DataSheet_5.pdf]

Supplementary Figure 5.

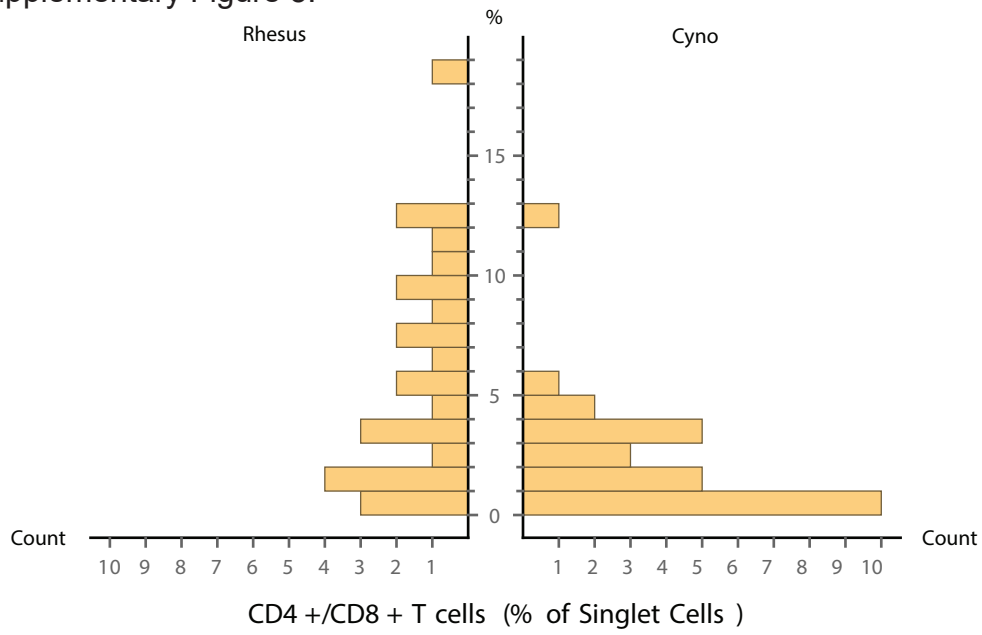

CD4 +/CD8 + T cells ( % of Singlet Cells )

| Species | Percent  |
|---------|----------|
| Human   | 0.110735 |
| Rhesus  | 5.26584  |
| Cyno    | 1.42308  |
| AGM     | 0.111882 |
| Mouse   | 0.183403 |
