# Supplementary material for: A Comprehensive Atlas of Immunological Differences Between Humans, Mice, and Non-Human Primates
Source: Front Immunol. 2022 Mar 11;13:867015. doi: 10.3389/fimmu.2022.867015 (PMC8962947; doi:10.3389/fimmu.2022.867015)
Supplement: Supplementary file 16 [file DataSheet_7.csv]

filename	population	uniquePopulationName	parentPopulation	channel	reagent	Condition	Donor	Gender	Species	percentOf	statistic	value
R2W1_D07932_Cy_F_TNFa.fcs	Basophils	Basophils	Singlets			TNFa	D07932	F	Cyno		eventCount	214
R2W1_D07932_Cy_F_TNFa.fcs	Basophils	Basophils	Singlets			TNFa	D07932	F	Cyno	Singlets	percent	0.15529753265602322
R2W1_D07932_Cy_F_TNFa.fcs	B Cells	B Cells	CD45+ CD66-			TNFa	D07932	F	Cyno		eventCount	2492
R2W1_D07932_Cy_F_TNFa.fcs	B Cells	B Cells	CD45+ CD66-			TNFa	D07932	F	Cyno	CD45+ CD66-	percent	3.461832326179065
R2W1_D07932_Cy_F_TNFa.fcs	CD1c+ B cells	CD1c+ B cells	B Cells			TNFa	D07932	F	Cyno		eventCount	138
R2W1_D07932_Cy_F_TNFa.fcs	CD1c+ B cells	CD1c+ B cells	B Cells			TNFa	D07932	F	Cyno	B Cells	percent	5.537720706260032
R2W1_D07932_Cy_F_TNFa.fcs	CD7+/HLA-DR-	CD7+/HLA-DR-	CD19- CD3-			TNFa	D07932	F	Cyno		eventCount	4281
R2W1_D07932_Cy_F_TNFa.fcs	CD7+/HLA-DR-	CD7+/HLA-DR-	CD19- CD3-			TNFa	D07932	F	Cyno	CD19- CD3-	percent	21.62121212121212
R2W1_D07932_Cy_F_TNFa.fcs	pDCs	pDCs	HLA-DR+ CD11c-			TNFa	D07932	F	Cyno		eventCount	3
R2W1_D07932_Cy_F_TNFa.fcs	pDCs	pDCs	HLA-DR+ CD11c-			TNFa	D07932	F	Cyno	HLA-DR+ CD11c-	percent	0.14727540500736377
R2W1_D07932_Cy_F_TNFa.fcs	CD11b-/CD16-	CD11b-/CD16-	HLA-DR+/CD7-			TNFa	D07932	F	Cyno		eventCount	295
R2W1_D07932_Cy_F_TNFa.fcs	CD11b-/CD16-	CD11b-/CD16-	HLA-DR+/CD7-			TNFa	D07932	F	Cyno	HLA-DR+/CD7-	percent	9.7682119205298
R2W1_D07932_Cy_F_TNFa.fcs	CD11b+/CD16-	CD11b+/CD16-	HLA-DR+/CD7-			TNFa	D07932	F	Cyno		eventCount	1900
R2W1_D07932_Cy_F_TNFa.fcs	CD11b+/CD16-	CD11b+/CD16-	HLA-DR+/CD7-			TNFa	D07932	F	Cyno	HLA-DR+/CD7-	percent	62.913907284768214
R2W1_D07932_Cy_F_TNFa.fcs	CD16+/CD11b-	CD16+/CD11b-	HLA-DR+/CD7-			TNFa	D07932	F	Cyno		eventCount	408
R2W1_D07932_Cy_F_TNFa.fcs	CD16+/CD11b-	CD16+/CD11b-	HLA-DR+/CD7-			TNFa	D07932	F	Cyno	HLA-DR+/CD7-	percent	13.509933774834437
R2W1_D07932_Cy_F_TNFa.fcs	CD16+/CD11b+	CD16+/CD11b+	HLA-DR+/CD7-			TNFa	D07932	F	Cyno		eventCount	373
R2W1_D07932_Cy_F_TNFa.fcs	CD16+/CD11b+	CD16+/CD11b+	HLA-DR+/CD7-			TNFa	D07932	F	Cyno	HLA-DR+/CD7-	percent	12.350993377483444
R2W1_D07932_Cy_F_TNFa.fcs	Neutrophils	Neutrophils	Non-Basophils			TNFa	D07932	F	Cyno		eventCount	35668
R2W1_D07932_Cy_F_TNFa.fcs	Neutrophils	Neutrophils	Non-Basophils			TNFa	D07932	F	Cyno	Non-Basophils	percent	25.93376231504708
R2W1_D07932_Cy_F_TNFa.fcs	CD8+T cells	CD8+T cells	T Cells			TNFa	D07932	F	Cyno		eventCount	23064
R2W1_D07932_Cy_F_TNFa.fcs	CD8+T cells	CD8+T cells	T Cells			TNFa	D07932	F	Cyno	T Cells	percent	47.47535044564748
R2W1_D07932_Cy_F_TNFa.fcs	CD4+T cells	CD4+T cells	T Cells			TNFa	D07932	F	Cyno		eventCount	18816
R2W1_D07932_Cy_F_TNFa.fcs	CD4+T cells	CD4+T cells	T Cells			TNFa	D07932	F	Cyno	T Cells	percent	38.73119120643873
R2W1_D07932_Cy_F_TNFa.fcs	CD4+/CD8+	CD4+/CD8+	T Cells			TNFa	D07932	F	Cyno		eventCount	4767
R2W1_D07932_Cy_F_TNFa.fcs	CD4+/CD8+	CD4+/CD8+	T Cells			TNFa	D07932	F	Cyno	T Cells	percent	9.812478129309813
R2W1_D07932_Cy_F_R848.fcs	Basophils	Basophils	Singlets			R848	D07932	F	Cyno		eventCount	273
R2W1_D07932_Cy_F_R848.fcs	Basophils	Basophils	Singlets			R848	D07932	F	Cyno	Singlets	percent	0.1617701086763294
R2W1_D07932_Cy_F_R848.fcs	B Cells	B Cells	CD45+ CD66-			R848	D07932	F	Cyno		eventCount	3235
R2W1_D07932_Cy_F_R848.fcs	B Cells	B Cells	CD45+ CD66-			R848	D07932	F	Cyno	CD45+ CD66-	percent	3.540549414468644
R2W1_D07932_Cy_F_R848.fcs	CD1c+ B cells	CD1c+ B cells	B Cells			R848	D07932	F	Cyno		eventCount	136
R2W1_D07932_Cy_F_R848.fcs	CD1c+ B cells	CD1c+ B cells	B Cells			R848	D07932	F	Cyno	B Cells	percent	4.204018547140649
R2W1_D07932_Cy_F_R848.fcs	CD7+/HLA-DR-	CD7+/HLA-DR-	CD19- CD3-			R848	D07932	F	Cyno		eventCount	5606
R2W1_D07932_Cy_F_R848.fcs	CD7+/HLA-DR-	CD7+/HLA-DR-	CD19- CD3-			R848	D07932	F	Cyno	CD19- CD3-	percent	20.575497320707626
R2W1_D07932_Cy_F_R848.fcs	pDCs	pDCs	HLA-DR+ CD11c-			R848	D07932	F	Cyno		eventCount	2
R2W1_D07932_Cy_F_R848.fcs	pDCs	pDCs	HLA-DR+ CD11c-			R848	D07932	F	Cyno	HLA-DR+ CD11c-	percent	0.08371703641691085
R2W1_D07932_Cy_F_R848.fcs	CD11b-/CD16-	CD11b-/CD16-	HLA-DR+/CD7-			R848	D07932	F	Cyno		eventCount	353
R2W1_D07932_Cy_F_R848.fcs	CD11b-/CD16-	CD11b-/CD16-	HLA-DR+/CD7-			R848	D07932	F	Cyno	HLA-DR+/CD7-	percent	10.07132667617689
R2W1_D07932_Cy_F_R848.fcs	CD11b+/CD16-	CD11b+/CD16-	HLA-DR+/CD7-			R848	D07932	F	Cyno		eventCount	2248
R2W1_D07932_Cy_F_R848.fcs	CD11b+/CD16-	CD11b+/CD16-	HLA-DR+/CD7-			R848	D07932	F	Cyno	HLA-DR+/CD7-	percent	64.13694721825964
R2W1_D07932_Cy_F_R848.fcs	CD16+/CD11b-	CD16+/CD11b-	HLA-DR+/CD7-			R848	D07932	F	Cyno		eventCount	418
R2W1_D07932_Cy_F_R848.fcs	CD16+/CD11b-	CD16+/CD11b-	HLA-DR+/CD7-			R848	D07932	F	Cyno	HLA-DR+/CD7-	percent	11.925820256776035
R2W1_D07932_Cy_F_R848.fcs	CD16+/CD11b+	CD16+/CD11b+	HLA-DR+/CD7-			R848	D07932	F	Cyno		eventCount	456
R2W1_D07932_Cy_F_R848.fcs	CD16+/CD11b+	CD16+/CD11b+	HLA-DR+/CD7-			R848	D07932	F	Cyno	HLA-DR+/CD7-	percent	13.009985734664765
R2W1_D07932_Cy_F_R848.fcs	Neutrophils	Neutrophils	Non-Basophils			R848	D07932	F	Cyno		eventCount	36590
R2W1_D07932_Cy_F_R848.fcs	Neutrophils	Neutrophils	Non-Basophils			R848	D07932	F	Cyno	Non-Basophils	percent	21.72944788555072
R2W1_D07932_Cy_F_R848.fcs	CD8+T cells	CD8+T cells	T Cells			R848	D07932	F	Cyno		eventCount	28006
R2W1_D07932_Cy_F_R848.fcs	CD8+T cells	CD8+T cells	T Cells			R848	D07932	F	Cyno	T Cells	percent	47.52982706243742
R2W1_D07932_Cy_F_R848.fcs	CD4+T cells	CD4+T cells	T Cells			R848	D07932	F	Cyno		eventCount	22309
R2W1_D07932_Cy_F_R848.fcs	CD4+T cells	CD4+T cells	T Cells			R848	D07932	F	Cyno	T Cells	percent	37.86127658130102
R2W1_D07932_Cy_F_R848.fcs	CD4+/CD8+	CD4+/CD8+	T Cells			R848	D07932	F	Cyno		eventCount	6230
R2W1_D07932_Cy_F_R848.fcs	CD4+/CD8+	CD4+/CD8+	T Cells			R848	D07932	F	Cyno	T Cells	percent	10.573120852638189
R2W1_D07932_Cy_F_PMAIono.fcs	Basophils	Basophils	Singlets			PMAIono	D07932	F	Cyno		eventCount	241
R2W1_D07932_Cy_F_PMAIono.fcs	Basophils	Basophils	Singlets			PMAIono	D07932	F	Cyno	Singlets	percent	0.16280043773727657
R2W1_D07932_Cy_F_PMAIono.fcs	B Cells	B Cells	CD45+ CD66-			PMAIono	D07932	F	Cyno		eventCount	1878
R2W1_D07932_Cy_F_PMAIono.fcs	B Cells	B Cells	CD45+ CD66-			PMAIono	D07932	F	Cyno	CD45+ CD66-	percent	2.843515784692255
R2W1_D07932_Cy_F_PMAIono.fcs	CD1c+ B cells	CD1c+ B cells	B Cells			PMAIono	D07932	F	Cyno		eventCount	103
R2W1_D07932_Cy_F_PMAIono.fcs	CD1c+ B cells	CD1c+ B cells	B Cells			PMAIono	D07932	F	Cyno	B Cells	percent	5.484558040468584
R2W1_D07932_Cy_F_PMAIono.fcs	CD7+/HLA-DR-	CD7+/HLA-DR-	CD19- CD3-			PMAIono	D07932	F	Cyno		eventCount	4423
R2W1_D07932_Cy_F_PMAIono.fcs	CD7+/HLA-DR-	CD7+/HLA-DR-	CD19- CD3-			PMAIono	D07932	F	Cyno	CD19- CD3-	percent	27.277212457600985
R2W1_D07932_Cy_F_PMAIono.fcs	pDCs	pDCs	HLA-DR+ CD11c-			PMAIono	D07932	F	Cyno		eventCount	9
R2W1_D07932_Cy_F_PMAIono.fcs	pDCs	pDCs	HLA-DR+ CD11c-			PMAIono	D07932	F	Cyno	HLA-DR+ CD11c-	percent	0.4143646408839779
R2W1_D07932_Cy_F_PMAIono.fcs	CD11b-/CD16-	CD11b-/CD16-	HLA-DR+/CD7-			PMAIono	D07932	F	Cyno		eventCount	297
R2W1_D07932_Cy_F_PMAIono.fcs	CD11b-/CD16-	CD11b-/CD16-	HLA-DR+/CD7-			PMAIono	D07932	F	Cyno	HLA-DR+/CD7-	percent	9.275452841973767
R2W1_D07932_Cy_F_PMAIono.fcs	CD11b+/CD16-	CD11b+/CD16-	HLA-DR+/CD7-			PMAIono	D07932	F	Cyno		eventCount	2074
R2W1_D07932_Cy_F_PMAIono.fcs	CD11b+/CD16-	CD11b+/CD16-	HLA-DR+/CD7-			PMAIono	D07932	F	Cyno	HLA-DR+/CD7-	percent	64.77201748906933
R2W1_D07932_Cy_F_PMAIono.fcs	CD16+/CD11b-	CD16+/CD11b-	HLA-DR+/CD7-			PMAIono	D07932	F	Cyno		eventCount	368
R2W1_D07932_Cy_F_PMAIono.fcs	CD16+/CD11b-	CD16+/CD11b-	HLA-DR+/CD7-			PMAIono	D07932	F	Cyno	HLA-DR+/CD7-	percent	11.492816989381636
R2W1_D07932_Cy_F_PMAIono.fcs	CD16+/CD11b+	CD16+/CD11b+	HLA-DR+/CD7-			PMAIono	D07932	F	Cyno		eventCount	428
R2W1_D07932_Cy_F_PMAIono.fcs	CD16+/CD11b+	CD16+/CD11b+	HLA-DR+/CD7-			PMAIono	D07932	F	Cyno	HLA-DR+/CD7-	percent	13.366645846346033
R2W1_D07932_Cy_F_PMAIono.fcs	Neutrophils	Neutrophils	Non-Basophils			PMAIono	D07932	F	Cyno		eventCount	46285
R2W1_D07932_Cy_F_PMAIono.fcs	Neutrophils	Neutrophils	Non-Basophils			PMAIono	D07932	F	Cyno	Non-Basophils	percent	31.33929175976708
R2W1_D07932_Cy_F_PMAIono.fcs	CD8+T cells	CD8+T cells	T Cells			PMAIono	D07932	F	Cyno		eventCount	22987
R2W1_D07932_Cy_F_PMAIono.fcs	CD8+T cells	CD8+T cells	T Cells			PMAIono	D07932	F	Cyno	T Cells	percent	49.280737485261014
R2W1_D07932_Cy_F_PMAIono.fcs	CD4+T cells	CD4+T cells	T Cells			PMAIono	D07932	F	Cyno		eventCount	17189
R2W1_D07932_Cy_F_PMAIono.fcs	CD4+T cells	CD4+T cells	T Cells			PMAIono	D07932	F	Cyno	T Cells	percent	36.850680673169684
R2W1_D07932_Cy_F_PMAIono.fcs	CD4+/CD8+	CD4+/CD8+	T Cells			PMAIono	D07932	F	Cyno		eventCount	4649
R2W1_D07932_Cy_F_PMAIono.fcs	CD4+/CD8+	CD4+/CD8+	T Cells			PMAIono	D07932	F	Cyno	T Cells	percent	9.966770286204309
R2W1_D07932_Cy_F_LPS.fcs	Basophils	Basophils	Singlets			LPS	D07932	F	Cyno		eventCount	213
R2W1_D07932_Cy_F_LPS.fcs	Basophils	Basophils	Singlets			LPS	D07932	F	Cyno	Singlets	percent	0.15143651397410648
R2W1_D07932_Cy_F_LPS.fcs	B Cells	B Cells	CD45+ CD66-			LPS	D07932	F	Cyno		eventCount	2394
R2W1_D07932_Cy_F_LPS.fcs	B Cells	B Cells	CD45+ CD66-			LPS	D07932	F	Cyno	CD45+ CD66-	percent	3.4211240836274777
R2W1_D07932_Cy_F_LPS.fcs	CD1c+ B cells	CD1c+ B cells	B Cells			LPS	D07932	F	Cyno		eventCount	150
R2W1_D07932_Cy_F_LPS.fcs	CD1c+ B cells	CD1c+ B cells	B Cells			LPS	D07932	F	Cyno	B Cells	percent	6.265664160401003
R2W1_D07932_Cy_F_LPS.fcs	CD7+/HLA-DR-	CD7+/HLA-DR-	CD19- CD3-			LPS	D07932	F	Cyno		eventCount	4297
R2W1_D07932_Cy_F_LPS.fcs	CD7+/HLA-DR-	CD7+/HLA-DR-	CD19- CD3-			LPS	D07932	F	Cyno	CD19- CD3-	percent	22.12439501596128
R2W1_D07932_Cy_F_LPS.fcs	pDCs	pDCs	HLA-DR+ CD11c-			LPS	D07932	F	Cyno		eventCount	10
R2W1_D07932_Cy_F_LPS.fcs	pDCs	pDCs	HLA-DR+ CD11c-			LPS	D07932	F	Cyno	HLA-DR+ CD11c-	percent	0.4604051565377532
R2W1_D07932_Cy_F_LPS.fcs	CD11b-/CD16-	CD11b-/CD16-	HLA-DR+/CD7-			LPS	D07932	F	Cyno		eventCount	341
R2W1_D07932_Cy_F_LPS.fcs	CD11b-/CD16-	CD11b-/CD16-	HLA-DR+/CD7-			LPS	D07932	F	Cyno	HLA-DR+/CD7-	percent	10.431324564086877
R2W1_D07932_Cy_F_LPS.fcs	CD11b+/CD16-	CD11b+/CD16-	HLA-DR+/CD7-			LPS	D07932	F	Cyno		eventCount	2048
R2W1_D07932_Cy_F_LPS.fcs	CD11b+/CD16-	CD11b+/CD16-	HLA-DR+/CD7-			LPS	D07932	F	Cyno	HLA-DR+/CD7-	percent	62.64912817375344
R2W1_D07932_Cy_F_LPS.fcs	CD16+/CD11b-	CD16+/CD11b-	HLA-DR+/CD7-			LPS	D07932	F	Cyno		eventCount	419
R2W1_D07932_Cy_F_LPS.fcs	CD16+/CD11b-	CD16+/CD11b-	HLA-DR+/CD7-			LPS	D07932	F	Cyno	HLA-DR+/CD7-	percent	12.81737534414194
R2W1_D07932_Cy_F_LPS.fcs	CD16+/CD11b+	CD16+/CD11b+	HLA-DR+/CD7-			LPS	D07932	F	Cyno		eventCount	418
R2W1_D07932_Cy_F_LPS.fcs	CD16+/CD11b+	CD16+/CD11b+	HLA-DR+/CD7-			LPS	D07932	F	Cyno	HLA-DR+/CD7-	percent	12.786784949525849
R2W1_D07932_Cy_F_LPS.fcs	Neutrophils	Neutrophils	Non-Basophils			LPS	D07932	F	Cyno		eventCount	38201
R2W1_D07932_Cy_F_LPS.fcs	Neutrophils	Neutrophils	Non-Basophils			LPS	D07932	F	Cyno	Non-Basophils	percent	27.215861729943075
R2W1_D07932_Cy_F_LPS.fcs	CD8+T cells	CD8+T cells	T Cells			LPS	D07932	F	Cyno		eventCount	22925
R2W1_D07932_Cy_F_LPS.fcs	CD8+T cells	CD8+T cells	T Cells			LPS	D07932	F	Cyno	T Cells	percent	48.745481607484585
R2W1_D07932_Cy_F_LPS.fcs	CD4+T cells	CD4+T cells	T Cells			LPS	D07932	F	Cyno		eventCount	17687
R2W1_D07932_Cy_F_LPS.fcs	CD4+T cells	CD4+T cells	T Cells			LPS	D07932	F	Cyno	T Cells	percent	37.607909844779925
R2W1_D07932_Cy_F_LPS.fcs	CD4+/CD8+	CD4+/CD8+	T Cells			LPS	D07932	F	Cyno		eventCount	4513
R2W1_D07932_Cy_F_LPS.fcs	CD4+/CD8+	CD4+/CD8+	T Cells			LPS	D07932	F	Cyno	T Cells	percent	9.596002551562833
R2W1_D07932_Cy_F_IL-12.fcs	Basophils	Basophils	Singlets			IL-12	D07932	F	Cyno		eventCount	336
R2W1_D07932_Cy_F_IL-12.fcs	Basophils	Basophils	Singlets			IL-12	D07932	F	Cyno	Singlets	percent	0.14680245894118726
R2W1_D07932_Cy_F_IL-12.fcs	B Cells	B Cells	CD45+ CD66-			IL-12	D07932	F	Cyno		eventCount	3535
R2W1_D07932_Cy_F_IL-12.fcs	B Cells	B Cells	CD45+ CD66-			IL-12	D07932	F	Cyno	CD45+ CD66-	percent	4.644471305444608
R2W1_D07932_Cy_F_IL-12.fcs	CD1c+ B cells	CD1c+ B cells	B Cells			IL-12	D07932	F	Cyno		eventCount	131
R2W1_D07932_Cy_F_IL-12.fcs	CD1c+ B cells	CD1c+ B cells	B Cells			IL-12	D07932	F	Cyno	B Cells	percent	3.705799151343706
R2W1_D07932_Cy_F_IL-12.fcs	CD7+/HLA-DR-	CD7+/HLA-DR-	CD19- CD3-			IL-12	D07932	F	Cyno		eventCount	6602
R2W1_D07932_Cy_F_IL-12.fcs	CD7+/HLA-DR-	CD7+/HLA-DR-	CD19- CD3-			IL-12	D07932	F	Cyno	CD19- CD3-	percent	45.66645915473473
R2W1_D07932_Cy_F_IL-12.fcs	pDCs	pDCs	HLA-DR+ CD11c-			IL-12	D07932	F	Cyno		eventCount	7
R2W1_D07932_Cy_F_IL-12.fcs	pDCs	pDCs	HLA-DR+ CD11c-			IL-12	D07932	F	Cyno	HLA-DR+ CD11c-	percent	0.2949852507374631
R2W1_D07932_Cy_F_IL-12.fcs	CD11b-/CD16-	CD11b-/CD16-	HLA-DR+/CD7-			IL-12	D07932	F	Cyno		eventCount	390
R2W1_D07932_Cy_F_IL-12.fcs	CD11b-/CD16-	CD11b-/CD16-	HLA-DR+/CD7-			IL-12	D07932	F	Cyno	HLA-DR+/CD7-	percent	11.101622544833475
R2W1_D07932_Cy_F_IL-12.fcs	CD11b+/CD16-	CD11b+/CD16-	HLA-DR+/CD7-			IL-12	D07932	F	Cyno		eventCount	2183
R2W1_D07932_Cy_F_IL-12.fcs	CD11b+/CD16-	CD11b+/CD16-	HLA-DR+/CD7-			IL-12	D07932	F	Cyno	HLA-DR+/CD7-	percent	62.14062055223456
R2W1_D07932_Cy_F_IL-12.fcs	CD16+/CD11b-	CD16+/CD11b-	HLA-DR+/CD7-			IL-12	D07932	F	Cyno		eventCount	455
R2W1_D07932_Cy_F_IL-12.fcs	CD16+/CD11b-	CD16+/CD11b-	HLA-DR+/CD7-			IL-12	D07932	F	Cyno	HLA-DR+/CD7-	percent	12.951892968972388
R2W1_D07932_Cy_F_IL-12.fcs	CD16+/CD11b+	CD16+/CD11b+	HLA-DR+/CD7-			IL-12	D07932	F	Cyno		eventCount	442
R2W1_D07932_Cy_F_IL-12.fcs	CD16+/CD11b+	CD16+/CD11b+	HLA-DR+/CD7-			IL-12	D07932	F	Cyno	HLA-DR+/CD7-	percent	12.581838884144606
R2W1_D07932_Cy_F_IL-12.fcs	Neutrophils	Neutrophils	Non-Basophils			IL-12	D07932	F	Cyno		eventCount	57145
R2W1_D07932_Cy_F_IL-12.fcs	Neutrophils	Neutrophils	Non-Basophils			IL-12	D07932	F	Cyno	Non-Basophils	percent	25.047337693076425
R2W1_D07932_Cy_F_IL-12.fcs	CD8+T cells	CD8+T cells	T Cells			IL-12	D07932	F	Cyno		eventCount	27363
R2W1_D07932_Cy_F_IL-12.fcs	CD8+T cells	CD8+T cells	T Cells			IL-12	D07932	F	Cyno	T Cells	percent	48.366740905716405
R2W1_D07932_Cy_F_IL-12.fcs	CD4+T cells	CD4+T cells	T Cells			IL-12	D07932	F	Cyno		eventCount	20692
R2W1_D07932_Cy_F_IL-12.fcs	CD4+T cells	CD4+T cells	T Cells			IL-12	D07932	F	Cyno	T Cells	percent	36.57510517198713
R2W1_D07932_Cy_F_IL-12.fcs	CD4+/CD8+	CD4+/CD8+	T Cells			IL-12	D07932	F	Cyno		eventCount	5974
R2W1_D07932_Cy_F_IL-12.fcs	CD4+/CD8+	CD4+/CD8+	T Cells			IL-12	D07932	F	Cyno	T Cells	percent	10.55962102732704
R2W1_D07932_Cy_F_IL-6.fcs	Basophils	Basophils	Singlets			IL-6	D07932	F	Cyno		eventCount	172
R2W1_D07932_Cy_F_IL-6.fcs	Basophils	Basophils	Singlets			IL-6	D07932	F	Cyno	Singlets	percent	0.13918785505041514
R2W1_D07932_Cy_F_IL-6.fcs	B Cells	B Cells	CD45+ CD66-			IL-6	D07932	F	Cyno		eventCount	2087
R2W1_D07932_Cy_F_IL-6.fcs	B Cells	B Cells	CD45+ CD66-			IL-6	D07932	F	Cyno	CD45+ CD66-	percent	3.391069803717665
R2W1_D07932_Cy_F_IL-6.fcs	CD1c+ B cells	CD1c+ B cells	B Cells			IL-6	D07932	F	Cyno		eventCount	130
R2W1_D07932_Cy_F_IL-6.fcs	CD1c+ B cells	CD1c+ B cells	B Cells			IL-6	D07932	F	Cyno	B Cells	percent	6.229036895064686
R2W1_D07932_Cy_F_IL-6.fcs	CD7+/HLA-DR-	CD7+/HLA-DR-	CD19- CD3-			IL-6	D07932	F	Cyno		eventCount	3467
R2W1_D07932_Cy_F_IL-6.fcs	CD7+/HLA-DR-	CD7+/HLA-DR-	CD19- CD3-			IL-6	D07932	F	Cyno	CD19- CD3-	percent	21.50744416873449
R2W1_D07932_Cy_F_IL-6.fcs	pDCs	pDCs	HLA-DR+ CD11c-			IL-6	D07932	F	Cyno		eventCount	6
R2W1_D07932_Cy_F_IL-6.fcs	pDCs	pDCs	HLA-DR+ CD11c-			IL-6	D07932	F	Cyno	HLA-DR+ CD11c-	percent	0.29925187032418954
R2W1_D07932_Cy_F_IL-6.fcs	CD11b-/CD16-	CD11b-/CD16-	HLA-DR+/CD7-			IL-6	D07932	F	Cyno		eventCount	286
R2W1_D07932_Cy_F_IL-6.fcs	CD11b-/CD16-	CD11b-/CD16-	HLA-DR+/CD7-			IL-6	D07932	F	Cyno	HLA-DR+/CD7-	percent	9.734513274336283
R2W1_D07932_Cy_F_IL-6.fcs	CD11b+/CD16-	CD11b+/CD16-	HLA-DR+/CD7-			IL-6	D07932	F	Cyno		eventCount	1893
R2W1_D07932_Cy_F_IL-6.fcs	CD11b+/CD16-	CD11b+/CD16-	HLA-DR+/CD7-			IL-6	D07932	F	Cyno	HLA-DR+/CD7-	percent	64.43158611300204
R2W1_D07932_Cy_F_IL-6.fcs	CD16+/CD11b-	CD16+/CD11b-	HLA-DR+/CD7-			IL-6	D07932	F	Cyno		eventCount	361
R2W1_D07932_Cy_F_IL-6.fcs	CD16+/CD11b-	CD16+/CD11b-	HLA-DR+/CD7-			IL-6	D07932	F	Cyno	HLA-DR+/CD7-	percent	12.287270251872021
R2W1_D07932_Cy_F_IL-6.fcs	CD16+/CD11b+	CD16+/CD11b+	HLA-DR+/CD7-			IL-6	D07932	F	Cyno		eventCount	372
R2W1_D07932_Cy_F_IL-6.fcs	CD16+/CD11b+	CD16+/CD11b+	HLA-DR+/CD7-			IL-6	D07932	F	Cyno	HLA-DR+/CD7-	percent	12.661674608577263
R2W1_D07932_Cy_F_IL-6.fcs	Neutrophils	Neutrophils	Non-Basophils			IL-6	D07932	F	Cyno		eventCount	36023
R2W1_D07932_Cy_F_IL-6.fcs	Neutrophils	Neutrophils	Non-Basophils			IL-6	D07932	F	Cyno	Non-Basophils	percent	29.20815360166056
R2W1_D07932_Cy_F_IL-6.fcs	CD8+T cells	CD8+T cells	T Cells			IL-6	D07932	F	Cyno		eventCount	21076
R2W1_D07932_Cy_F_IL-6.fcs	CD8+T cells	CD8+T cells	T Cells			IL-6	D07932	F	Cyno	T Cells	percent	49.58825467036846
R2W1_D07932_Cy_F_IL-6.fcs	CD4+T cells	CD4+T cells	T Cells			IL-6	D07932	F	Cyno		eventCount	15760
R2W1_D07932_Cy_F_IL-6.fcs	CD4+T cells	CD4+T cells	T Cells			IL-6	D07932	F	Cyno	T Cells	percent	37.08060797138958
R2W1_D07932_Cy_F_IL-6.fcs	CD4+/CD8+	CD4+/CD8+	T Cells			IL-6	D07932	F	Cyno		eventCount	3989
R2W1_D07932_Cy_F_IL-6.fcs	CD4+/CD8+	CD4+/CD8+	T Cells			IL-6	D07932	F	Cyno	T Cells	percent	9.385440685144228
R2W1_D07932_Cy_F_IL-4.fcs	Basophils	Basophils	Singlets			IL-4	D07932	F	Cyno		eventCount	210
R2W1_D07932_Cy_F_IL-4.fcs	Basophils	Basophils	Singlets			IL-4	D07932	F	Cyno	Singlets	percent	0.14204545454545456
R2W1_D07932_Cy_F_IL-4.fcs	B Cells	B Cells	CD45+ CD66-			IL-4	D07932	F	Cyno		eventCount	2501
R2W1_D07932_Cy_F_IL-4.fcs	B Cells	B Cells	CD45+ CD66-			IL-4	D07932	F	Cyno	CD45+ CD66-	percent	3.307194901022176
R2W1_D07932_Cy_F_IL-4.fcs	CD1c+ B cells	CD1c+ B cells	B Cells			IL-4	D07932	F	Cyno		eventCount	81
R2W1_D07932_Cy_F_IL-4.fcs	CD1c+ B cells	CD1c+ B cells	B Cells			IL-4	D07932	F	Cyno	B Cells	percent	3.2387045181927228
R2W1_D07932_Cy_F_IL-4.fcs	CD7+/HLA-DR-	CD7+/HLA-DR-	CD19- CD3-			IL-4	D07932	F	Cyno		eventCount	4265
R2W1_D07932_Cy_F_IL-4.fcs	CD7+/HLA-DR-	CD7+/HLA-DR-	CD19- CD3-			IL-4	D07932	F	Cyno	CD19- CD3-	percent	19.2229684049218
R2W1_D07932_Cy_F_IL-4.fcs	pDCs	pDCs	HLA-DR+ CD11c-			IL-4	D07932	F	Cyno		eventCount	4
R2W1_D07932_Cy_F_IL-4.fcs	pDCs	pDCs	HLA-DR+ CD11c-			IL-4	D07932	F	Cyno	HLA-DR+ CD11c-	percent	0.18198362147406733
R2W1_D07932_Cy_F_IL-4.fcs	CD11b-/CD16-	CD11b-/CD16-	HLA-DR+/CD7-			IL-4	D07932	F	Cyno		eventCount	322
R2W1_D07932_Cy_F_IL-4.fcs	CD11b-/CD16-	CD11b-/CD16-	HLA-DR+/CD7-			IL-4	D07932	F	Cyno	HLA-DR+/CD7-	percent	9.501327825317203
R2W1_D07932_Cy_F_IL-4.fcs	CD11b+/CD16-	CD11b+/CD16-	HLA-DR+/CD7-			IL-4	D07932	F	Cyno		eventCount	2108
R2W1_D07932_Cy_F_IL-4.fcs	CD11b+/CD16-	CD11b+/CD16-	HLA-DR+/CD7-			IL-4	D07932	F	Cyno	HLA-DR+/CD7-	percent	62.201239303629386
R2W1_D07932_Cy_F_IL-4.fcs	CD16+/CD11b-	CD16+/CD11b-	HLA-DR+/CD7-			IL-4	D07932	F	Cyno		eventCount	471
R2W1_D07932_Cy_F_IL-4.fcs	CD16+/CD11b-	CD16+/CD11b-	HLA-DR+/CD7-			IL-4	D07932	F	Cyno	HLA-DR+/CD7-	percent	13.897904986721747
R2W1_D07932_Cy_F_IL-4.fcs	CD16+/CD11b+	CD16+/CD11b+	HLA-DR+/CD7-			IL-4	D07932	F	Cyno		eventCount	445
R2W1_D07932_Cy_F_IL-4.fcs	CD16+/CD11b+	CD16+/CD11b+	HLA-DR+/CD7-			IL-4	D07932	F	Cyno	HLA-DR+/CD7-	percent	13.13071702567129
R2W1_D07932_Cy_F_IL-4.fcs	Neutrophils	Neutrophils	Non-Basophils			IL-4	D07932	F	Cyno		eventCount	38518
R2W1_D07932_Cy_F_IL-4.fcs	Neutrophils	Neutrophils	Non-Basophils			IL-4	D07932	F	Cyno	Non-Basophils	percent	26.10575684871159
R2W1_D07932_Cy_F_IL-4.fcs	CD8+T cells	CD8+T cells	T Cells			IL-4	D07932	F	Cyno		eventCount	24566
R2W1_D07932_Cy_F_IL-4.fcs	CD8+T cells	CD8+T cells	T Cells			IL-4	D07932	F	Cyno	T Cells	percent	49.34913619927682
R2W1_D07932_Cy_F_IL-4.fcs	CD4+T cells	CD4+T cells	T Cells			IL-4	D07932	F	Cyno		eventCount	18574
R2W1_D07932_Cy_F_IL-4.fcs	CD4+T cells	CD4+T cells	T Cells			IL-4	D07932	F	Cyno	T Cells	percent	37.31217356368019
R2W1_D07932_Cy_F_IL-4.fcs	CD4+/CD8+	CD4+/CD8+	T Cells			IL-4	D07932	F	Cyno		eventCount	4675
R2W1_D07932_Cy_F_IL-4.fcs	CD4+/CD8+	CD4+/CD8+	T Cells			IL-4	D07932	F	Cyno	T Cells	percent	9.391321815990358
R2W1_D07932_Cy_F_IL-2.fcs	Basophils	Basophils	Singlets			IL-2	D07932	F	Cyno		eventCount	285
R2W1_D07932_Cy_F_IL-2.fcs	Basophils	Basophils	Singlets			IL-2	D07932	F	Cyno	Singlets	percent	0.14971396752520186
R2W1_D07932_Cy_F_IL-2.fcs	B Cells	B Cells	CD45+ CD66-			IL-2	D07932	F	Cyno		eventCount	3098
R2W1_D07932_Cy_F_IL-2.fcs	B Cells	B Cells	CD45+ CD66-			IL-2	D07932	F	Cyno	CD45+ CD66-	percent	3.263904253189629
R2W1_D07932_Cy_F_IL-2.fcs	CD1c+ B cells	CD1c+ B cells	B Cells			IL-2	D07932	F	Cyno		eventCount	98
R2W1_D07932_Cy_F_IL-2.fcs	CD1c+ B cells	CD1c+ B cells	B Cells			IL-2	D07932	F	Cyno	B Cells	percent	3.1633311814073597
R2W1_D07932_Cy_F_IL-2.fcs	CD7+/HLA-DR-	CD7+/HLA-DR-	CD19- CD3-			IL-2	D07932	F	Cyno		eventCount	6278
R2W1_D07932_Cy_F_IL-2.fcs	CD7+/HLA-DR-	CD7+/HLA-DR-	CD19- CD3-			IL-2	D07932	F	Cyno	CD19- CD3-	percent	22.29640941861704
R2W1_D07932_Cy_F_IL-2.fcs	pDCs	pDCs	HLA-DR+ CD11c-			IL-2	D07932	F	Cyno		eventCount	8
R2W1_D07932_Cy_F_IL-2.fcs	pDCs	pDCs	HLA-DR+ CD11c-			IL-2	D07932	F	Cyno	HLA-DR+ CD11c-	percent	0.31683168316831684
R2W1_D07932_Cy_F_IL-2.fcs	CD11b-/CD16-	CD11b-/CD16-	HLA-DR+/CD7-			IL-2	D07932	F	Cyno		eventCount	347
R2W1_D07932_Cy_F_IL-2.fcs	CD11b-/CD16-	CD11b-/CD16-	HLA-DR+/CD7-			IL-2	D07932	F	Cyno	HLA-DR+/CD7-	percent	9.196925523456136
R2W1_D07932_Cy_F_IL-2.fcs	CD11b+/CD16-	CD11b+/CD16-	HLA-DR+/CD7-			IL-2	D07932	F	Cyno		eventCount	2421
R2W1_D07932_Cy_F_IL-2.fcs	CD11b+/CD16-	CD11b+/CD16-	HLA-DR+/CD7-			IL-2	D07932	F	Cyno	HLA-DR+/CD7-	percent	64.16644579909887
R2W1_D07932_Cy_F_IL-2.fcs	CD16+/CD11b-	CD16+/CD11b-	HLA-DR+/CD7-			IL-2	D07932	F	Cyno		eventCount	471
R2W1_D07932_Cy_F_IL-2.fcs	CD16+/CD11b-	CD16+/CD11b-	HLA-DR+/CD7-			IL-2	D07932	F	Cyno	HLA-DR+/CD7-	percent	12.483434932414525
R2W1_D07932_Cy_F_IL-2.fcs	CD16+/CD11b+	CD16+/CD11b+	HLA-DR+/CD7-			IL-2	D07932	F	Cyno		eventCount	489
R2W1_D07932_Cy_F_IL-2.fcs	CD16+/CD11b+	CD16+/CD11b+	HLA-DR+/CD7-			IL-2	D07932	F	Cyno	HLA-DR+/CD7-	percent	12.960508878876226
R2W1_D07932_Cy_F_IL-2.fcs	Neutrophils	Neutrophils	Non-Basophils			IL-2	D07932	F	Cyno		eventCount	45365
R2W1_D07932_Cy_F_IL-2.fcs	Neutrophils	Neutrophils	Non-Basophils			IL-2	D07932	F	Cyno	Non-Basophils	percent	23.8834808337238
R2W1_D07932_Cy_F_IL-2.fcs	CD8+T cells	CD8+T cells	T Cells			IL-2	D07932	F	Cyno		eventCount	29152
R2W1_D07932_Cy_F_IL-2.fcs	CD8+T cells	CD8+T cells	T Cells			IL-2	D07932	F	Cyno	T Cells	percent	47.57335422174353
R2W1_D07932_Cy_F_IL-2.fcs	CD4+T cells	CD4+T cells	T Cells			IL-2	D07932	F	Cyno		eventCount	22989
R2W1_D07932_Cy_F_IL-2.fcs	CD4+T cells	CD4+T cells	T Cells			IL-2	D07932	F	Cyno	T Cells	percent	37.515911093704105
R2W1_D07932_Cy_F_IL-2.fcs	CD4+/CD8+	CD4+/CD8+	T Cells			IL-2	D07932	F	Cyno		eventCount	6574
R2W1_D07932_Cy_F_IL-2.fcs	CD4+/CD8+	CD4+/CD8+	T Cells			IL-2	D07932	F	Cyno	T Cells	percent	10.728156924181599
R2W1_D07932_Cy_F_IFNg.fcs	Basophils	Basophils	Singlets			IFNg	D07932	F	Cyno		eventCount	213
R2W1_D07932_Cy_F_IFNg.fcs	Basophils	Basophils	Singlets			IFNg	D07932	F	Cyno	Singlets	percent	0.12315626969488468
R2W1_D07932_Cy_F_IFNg.fcs	B Cells	B Cells	CD45+ CD66-			IFNg	D07932	F	Cyno		eventCount	2962
R2W1_D07932_Cy_F_IFNg.fcs	B Cells	B Cells	CD45+ CD66-			IFNg	D07932	F	Cyno	CD45+ CD66-	percent	3.234825153441234
R2W1_D07932_Cy_F_IFNg.fcs	CD1c+ B cells	CD1c+ B cells	B Cells			IFNg	D07932	F	Cyno		eventCount	145
R2W1_D07932_Cy_F_IFNg.fcs	CD1c+ B cells	CD1c+ B cells	B Cells			IFNg	D07932	F	Cyno	B Cells	percent	4.895340985820392
R2W1_D07932_Cy_F_IFNg.fcs	CD7+/HLA-DR-	CD7+/HLA-DR-	CD19- CD3-			IFNg	D07932	F	Cyno		eventCount	5050
R2W1_D07932_Cy_F_IFNg.fcs	CD7+/HLA-DR-	CD7+/HLA-DR-	CD19- CD3-			IFNg	D07932	F	Cyno	CD19- CD3-	percent	19.83191957273013
R2W1_D07932_Cy_F_IFNg.fcs	pDCs	pDCs	HLA-DR+ CD11c-			IFNg	D07932	F	Cyno		eventCount	11
R2W1_D07932_Cy_F_IFNg.fcs	pDCs	pDCs	HLA-DR+ CD11c-			IFNg	D07932	F	Cyno	HLA-DR+ CD11c-	percent	0.3767123287671233
R2W1_D07932_Cy_F_IFNg.fcs	CD11b-/CD16-	CD11b-/CD16-	HLA-DR+/CD7-			IFNg	D07932	F	Cyno		eventCount	444
R2W1_D07932_Cy_F_IFNg.fcs	CD11b-/CD16-	CD11b-/CD16-	HLA-DR+/CD7-			IFNg	D07932	F	Cyno	HLA-DR+/CD7-	percent	10.093203000681973
R2W1_D07932_Cy_F_IFNg.fcs	CD11b+/CD16-	CD11b+/CD16-	HLA-DR+/CD7-			IFNg	D07932	F	Cyno		eventCount	2737
R2W1_D07932_Cy_F_IFNg.fcs	CD11b+/CD16-	CD11b+/CD16-	HLA-DR+/CD7-			IFNg	D07932	F	Cyno	HLA-DR+/CD7-	percent	62.21868606501478
R2W1_D07932_Cy_F_IFNg.fcs	CD16+/CD11b-	CD16+/CD11b-	HLA-DR+/CD7-			IFNg	D07932	F	Cyno		eventCount	558
R2W1_D07932_Cy_F_IFNg.fcs	CD16+/CD11b-	CD16+/CD11b-	HLA-DR+/CD7-			IFNg	D07932	F	Cyno	HLA-DR+/CD7-	percent	12.684701068424642
R2W1_D07932_Cy_F_IFNg.fcs	CD16+/CD11b+	CD16+/CD11b+	HLA-DR+/CD7-			IFNg	D07932	F	Cyno		eventCount	607
R2W1_D07932_Cy_F_IFNg.fcs	CD16+/CD11b+	CD16+/CD11b+	HLA-DR+/CD7-			IFNg	D07932	F	Cyno	HLA-DR+/CD7-	percent	13.798590588770175
R2W1_D07932_Cy_F_IFNg.fcs	Neutrophils	Neutrophils	Non-Basophils			IFNg	D07932	F	Cyno		eventCount	45959
R2W1_D07932_Cy_F_IFNg.fcs	Neutrophils	Neutrophils	Non-Basophils			IFNg	D07932	F	Cyno	Non-Basophils	percent	26.614663863842996
R2W1_D07932_Cy_F_IFNg.fcs	CD8+T cells	CD8+T cells	T Cells			IFNg	D07932	F	Cyno		eventCount	31005
R2W1_D07932_Cy_F_IFNg.fcs	CD8+T cells	CD8+T cells	T Cells			IFNg	D07932	F	Cyno	T Cells	percent	49.8608944566843
R2W1_D07932_Cy_F_IFNg.fcs	CD4+T cells	CD4+T cells	T Cells			IFNg	D07932	F	Cyno		eventCount	23323
R2W1_D07932_Cy_F_IFNg.fcs	CD4+T cells	CD4+T cells	T Cells			IFNg	D07932	F	Cyno	T Cells	percent	37.50703568499429
R2W1_D07932_Cy_F_IFNg.fcs	CD4+/CD8+	CD4+/CD8+	T Cells			IFNg	D07932	F	Cyno		eventCount	5431
R2W1_D07932_Cy_F_IFNg.fcs	CD4+/CD8+	CD4+/CD8+	T Cells			IFNg	D07932	F	Cyno	T Cells	percent	8.733898332341637
R2W1_D07932_Cy_F_IFNb.fcs	Basophils	Basophils	Singlets			IFNb	D07932	F	Cyno		eventCount	170
R2W1_D07932_Cy_F_IFNb.fcs	Basophils	Basophils	Singlets			IFNb	D07932	F	Cyno	Singlets	percent	0.14803977915948238
R2W1_D07932_Cy_F_IFNb.fcs	B Cells	B Cells	CD45+ CD66-			IFNb	D07932	F	Cyno		eventCount	1700
R2W1_D07932_Cy_F_IFNb.fcs	B Cells	B Cells	CD45+ CD66-			IFNb	D07932	F	Cyno	CD45+ CD66-	percent	3.119495008807986
R2W1_D07932_Cy_F_IFNb.fcs	CD1c+ B cells	CD1c+ B cells	B Cells			IFNb	D07932	F	Cyno		eventCount	95
R2W1_D07932_Cy_F_IFNb.fcs	CD1c+ B cells	CD1c+ B cells	B Cells			IFNb	D07932	F	Cyno	B Cells	percent	5.588235294117647
R2W1_D07932_Cy_F_IFNb.fcs	CD7+/HLA-DR-	CD7+/HLA-DR-	CD19- CD3-			IFNb	D07932	F	Cyno		eventCount	3194
R2W1_D07932_Cy_F_IFNb.fcs	CD7+/HLA-DR-	CD7+/HLA-DR-	CD19- CD3-			IFNb	D07932	F	Cyno	CD19- CD3-	percent	23.512956419316843
R2W1_D07932_Cy_F_IFNb.fcs	pDCs	pDCs	HLA-DR+ CD11c-			IFNb	D07932	F	Cyno		eventCount	3
R2W1_D07932_Cy_F_IFNb.fcs	pDCs	pDCs	HLA-DR+ CD11c-			IFNb	D07932	F	Cyno	HLA-DR+ CD11c-	percent	0.15205271160669032
R2W1_D07932_Cy_F_IFNb.fcs	CD11b-/CD16-	CD11b-/CD16-	HLA-DR+/CD7-			IFNb	D07932	F	Cyno		eventCount	254
R2W1_D07932_Cy_F_IFNb.fcs	CD11b-/CD16-	CD11b-/CD16-	HLA-DR+/CD7-			IFNb	D07932	F	Cyno	HLA-DR+/CD7-	percent	8.788927335640139
R2W1_D07932_Cy_F_IFNb.fcs	CD11b+/CD16-	CD11b+/CD16-	HLA-DR+/CD7-			IFNb	D07932	F	Cyno		eventCount	1866
R2W1_D07932_Cy_F_IFNb.fcs	CD11b+/CD16-	CD11b+/CD16-	HLA-DR+/CD7-			IFNb	D07932	F	Cyno	HLA-DR+/CD7-	percent	64.5674740484429
R2W1_D07932_Cy_F_IFNb.fcs	CD16+/CD11b-	CD16+/CD11b-	HLA-DR+/CD7-			IFNb	D07932	F	Cyno		eventCount	323
R2W1_D07932_Cy_F_IFNb.fcs	CD16+/CD11b-	CD16+/CD11b-	HLA-DR+/CD7-			IFNb	D07932	F	Cyno	HLA-DR+/CD7-	percent	11.176470588235293
R2W1_D07932_Cy_F_IFNb.fcs	CD16+/CD11b+	CD16+/CD11b+	HLA-DR+/CD7-			IFNb	D07932	F	Cyno		eventCount	407
R2W1_D07932_Cy_F_IFNb.fcs	CD16+/CD11b+	CD16+/CD11b+	HLA-DR+/CD7-			IFNb	D07932	F	Cyno	HLA-DR+/CD7-	percent	14.083044982698961
R2W1_D07932_Cy_F_IFNb.fcs	Neutrophils	Neutrophils	Non-Basophils			IFNb	D07932	F	Cyno		eventCount	36647
R2W1_D07932_Cy_F_IFNb.fcs	Neutrophils	Neutrophils	Non-Basophils			IFNb	D07932	F	Cyno	Non-Basophils	percent	31.971210468920393
R2W1_D07932_Cy_F_IFNb.fcs	CD8+T cells	CD8+T cells	T Cells			IFNb	D07932	F	Cyno		eventCount	19441
R2W1_D07932_Cy_F_IFNb.fcs	CD8+T cells	CD8+T cells	T Cells			IFNb	D07932	F	Cyno	T Cells	percent	50.51841072681444
R2W1_D07932_Cy_F_IFNb.fcs	CD4+T cells	CD4+T cells	T Cells			IFNb	D07932	F	Cyno		eventCount	14128
R2W1_D07932_Cy_F_IFNb.fcs	CD4+T cells	CD4+T cells	T Cells			IFNb	D07932	F	Cyno	T Cells	percent	36.7123145284931
R2W1_D07932_Cy_F_IFNb.fcs	CD4+/CD8+	CD4+/CD8+	T Cells			IFNb	D07932	F	Cyno		eventCount	3435
R2W1_D07932_Cy_F_IFNb.fcs	CD4+/CD8+	CD4+/CD8+	T Cells			IFNb	D07932	F	Cyno	T Cells	percent	8.926019281241068
R2W1_D07932_Cy_F_IFNa2.fcs	Basophils	Basophils	Singlets			IFNa2	D07932	F	Cyno		eventCount	133
R2W1_D07932_Cy_F_IFNa2.fcs	Basophils	Basophils	Singlets			IFNa2	D07932	F	Cyno	Singlets	percent	0.1094668224991358
R2W1_D07932_Cy_F_IFNa2.fcs	B Cells	B Cells	CD45+ CD66-			IFNa2	D07932	F	Cyno		eventCount	2168
R2W1_D07932_Cy_F_IFNa2.fcs	B Cells	B Cells	CD45+ CD66-			IFNa2	D07932	F	Cyno	CD45+ CD66-	percent	3.3797371661963926
R2W1_D07932_Cy_F_IFNa2.fcs	CD1c+ B cells	CD1c+ B cells	B Cells			IFNa2	D07932	F	Cyno		eventCount	90
R2W1_D07932_Cy_F_IFNa2.fcs	CD1c+ B cells	CD1c+ B cells	B Cells			IFNa2	D07932	F	Cyno	B Cells	percent	4.1512915129151295
R2W1_D07932_Cy_F_IFNa2.fcs	CD7+/HLA-DR-	CD7+/HLA-DR-	CD19- CD3-			IFNa2	D07932	F	Cyno		eventCount	3441
R2W1_D07932_Cy_F_IFNa2.fcs	CD7+/HLA-DR-	CD7+/HLA-DR-	CD19- CD3-			IFNa2	D07932	F	Cyno	CD19- CD3-	percent	18.53288091775731
R2W1_D07932_Cy_F_IFNa2.fcs	pDCs	pDCs	HLA-DR+ CD11c-			IFNa2	D07932	F	Cyno		eventCount	7
R2W1_D07932_Cy_F_IFNa2.fcs	pDCs	pDCs	HLA-DR+ CD11c-			IFNa2	D07932	F	Cyno	HLA-DR+ CD11c-	percent	0.3434739941118744
R2W1_D07932_Cy_F_IFNa2.fcs	CD11b-/CD16-	CD11b-/CD16-	HLA-DR+/CD7-			IFNa2	D07932	F	Cyno		eventCount	268
R2W1_D07932_Cy_F_IFNa2.fcs	CD11b-/CD16-	CD11b-/CD16-	HLA-DR+/CD7-			IFNa2	D07932	F	Cyno	HLA-DR+/CD7-	percent	8.758169934640524
R2W1_D07932_Cy_F_IFNa2.fcs	CD11b+/CD16-	CD11b+/CD16-	HLA-DR+/CD7-			IFNa2	D07932	F	Cyno		eventCount	1949
R2W1_D07932_Cy_F_IFNa2.fcs	CD11b+/CD16-	CD11b+/CD16-	HLA-DR+/CD7-			IFNa2	D07932	F	Cyno	HLA-DR+/CD7-	percent	63.69281045751634
R2W1_D07932_Cy_F_IFNa2.fcs	CD16+/CD11b-	CD16+/CD11b-	HLA-DR+/CD7-			IFNa2	D07932	F	Cyno		eventCount	403
R2W1_D07932_Cy_F_IFNa2.fcs	CD16+/CD11b-	CD16+/CD11b-	HLA-DR+/CD7-			IFNa2	D07932	F	Cyno	HLA-DR+/CD7-	percent	13.169934640522875
R2W1_D07932_Cy_F_IFNa2.fcs	CD16+/CD11b+	CD16+/CD11b+	HLA-DR+/CD7-			IFNa2	D07932	F	Cyno		eventCount	408
R2W1_D07932_Cy_F_IFNa2.fcs	CD16+/CD11b+	CD16+/CD11b+	HLA-DR+/CD7-			IFNa2	D07932	F	Cyno	HLA-DR+/CD7-	percent	13.333333333333334
R2W1_D07932_Cy_F_IFNa2.fcs	Neutrophils	Neutrophils	Non-Basophils			IFNa2	D07932	F	Cyno		eventCount	32243
R2W1_D07932_Cy_F_IFNa2.fcs	Neutrophils	Neutrophils	Non-Basophils			IFNa2	D07932	F	Cyno	Non-Basophils	percent	26.579450654532266
R2W1_D07932_Cy_F_IFNa2.fcs	CD8+T cells	CD8+T cells	T Cells			IFNa2	D07932	F	Cyno		eventCount	21381
R2W1_D07932_Cy_F_IFNa2.fcs	CD8+T cells	CD8+T cells	T Cells			IFNa2	D07932	F	Cyno	T Cells	percent	50.01988536670956
R2W1_D07932_Cy_F_IFNa2.fcs	CD4+T cells	CD4+T cells	T Cells			IFNa2	D07932	F	Cyno		eventCount	16100
R2W1_D07932_Cy_F_IFNa2.fcs	CD4+T cells	CD4+T cells	T Cells			IFNa2	D07932	F	Cyno	T Cells	percent	37.66522400280735
R2W1_D07932_Cy_F_IFNa2.fcs	CD4+/CD8+	CD4+/CD8+	T Cells			IFNa2	D07932	F	Cyno		eventCount	3666
R2W1_D07932_Cy_F_IFNa2.fcs	CD4+/CD8+	CD4+/CD8+	T Cells			IFNa2	D07932	F	Cyno	T Cells	percent	8.576441689086442
R2W1_D07932_Cy_F_GM-CSF.fcs	Basophils	Basophils	Singlets			GM-CSF	D07932	F	Cyno		eventCount	159
R2W1_D07932_Cy_F_GM-CSF.fcs	Basophils	Basophils	Singlets			GM-CSF	D07932	F	Cyno	Singlets	percent	0.12661050150499276
R2W1_D07932_Cy_F_GM-CSF.fcs	B Cells	B Cells	CD45+ CD66-			GM-CSF	D07932	F	Cyno		eventCount	2323
R2W1_D07932_Cy_F_GM-CSF.fcs	B Cells	B Cells	CD45+ CD66-			GM-CSF	D07932	F	Cyno	CD45+ CD66-	percent	3.4719316075805584
R2W1_D07932_Cy_F_GM-CSF.fcs	CD1c+ B cells	CD1c+ B cells	B Cells			GM-CSF	D07932	F	Cyno		eventCount	119
R2W1_D07932_Cy_F_GM-CSF.fcs	CD1c+ B cells	CD1c+ B cells	B Cells			GM-CSF	D07932	F	Cyno	B Cells	percent	5.122686181661645
R2W1_D07932_Cy_F_GM-CSF.fcs	CD7+/HLA-DR-	CD7+/HLA-DR-	CD19- CD3-			GM-CSF	D07932	F	Cyno		eventCount	3709
R2W1_D07932_Cy_F_GM-CSF.fcs	CD7+/HLA-DR-	CD7+/HLA-DR-	CD19- CD3-			GM-CSF	D07932	F	Cyno	CD19- CD3-	percent	19.672218096955554
R2W1_D07932_Cy_F_GM-CSF.fcs	pDCs	pDCs	HLA-DR+ CD11c-			GM-CSF	D07932	F	Cyno		eventCount	3
R2W1_D07932_Cy_F_GM-CSF.fcs	pDCs	pDCs	HLA-DR+ CD11c-			GM-CSF	D07932	F	Cyno	HLA-DR+ CD11c-	percent	0.15136226034308778
R2W1_D07932_Cy_F_GM-CSF.fcs	CD11b-/CD16-	CD11b-/CD16-	HLA-DR+/CD7-			GM-CSF	D07932	F	Cyno		eventCount	263
R2W1_D07932_Cy_F_GM-CSF.fcs	CD11b-/CD16-	CD11b-/CD16-	HLA-DR+/CD7-			GM-CSF	D07932	F	Cyno	HLA-DR+/CD7-	percent	8.731739707835326
R2W1_D07932_Cy_F_GM-CSF.fcs	CD11b+/CD16-	CD11b+/CD16-	HLA-DR+/CD7-			GM-CSF	D07932	F	Cyno		eventCount	1886
R2W1_D07932_Cy_F_GM-CSF.fcs	CD11b+/CD16-	CD11b+/CD16-	HLA-DR+/CD7-			GM-CSF	D07932	F	Cyno	HLA-DR+/CD7-	percent	62.61620185922975
R2W1_D07932_Cy_F_GM-CSF.fcs	CD16+/CD11b-	CD16+/CD11b-	HLA-DR+/CD7-			GM-CSF	D07932	F	Cyno		eventCount	433
R2W1_D07932_Cy_F_GM-CSF.fcs	CD16+/CD11b-	CD16+/CD11b-	HLA-DR+/CD7-			GM-CSF	D07932	F	Cyno	HLA-DR+/CD7-	percent	14.375830013280213
R2W1_D07932_Cy_F_GM-CSF.fcs	CD16+/CD11b+	CD16+/CD11b+	HLA-DR+/CD7-			GM-CSF	D07932	F	Cyno		eventCount	393
R2W1_D07932_Cy_F_GM-CSF.fcs	CD16+/CD11b+	CD16+/CD11b+	HLA-DR+/CD7-			GM-CSF	D07932	F	Cyno	HLA-DR+/CD7-	percent	13.047808764940239
R2W1_D07932_Cy_F_GM-CSF.fcs	Neutrophils	Neutrophils	Non-Basophils			GM-CSF	D07932	F	Cyno		eventCount	32451
R2W1_D07932_Cy_F_GM-CSF.fcs	Neutrophils	Neutrophils	Non-Basophils			GM-CSF	D07932	F	Cyno	Non-Basophils	percent	25.881705507967652
R2W1_D07932_Cy_F_GM-CSF.fcs	CD8+T cells	CD8+T cells	T Cells			GM-CSF	D07932	F	Cyno		eventCount	22129
R2W1_D07932_Cy_F_GM-CSF.fcs	CD8+T cells	CD8+T cells	T Cells			GM-CSF	D07932	F	Cyno	T Cells	percent	49.190859378473306
R2W1_D07932_Cy_F_GM-CSF.fcs	CD4+T cells	CD4+T cells	T Cells			GM-CSF	D07932	F	Cyno		eventCount	17151
R2W1_D07932_Cy_F_GM-CSF.fcs	CD4+T cells	CD4+T cells	T Cells			GM-CSF	D07932	F	Cyno	T Cells	percent	38.1251945049571
R2W1_D07932_Cy_F_GM-CSF.fcs	CD4+/CD8+	CD4+/CD8+	T Cells			GM-CSF	D07932	F	Cyno		eventCount	3960
R2W1_D07932_Cy_F_GM-CSF.fcs	CD4+/CD8+	CD4+/CD8+	T Cells			GM-CSF	D07932	F	Cyno	T Cells	percent	8.802738629795936
R2W1_D07932_Cy_F_Ebola VLPs.fcs	Basophils	Basophils	Singlets			Ebola VLPs	D07932	F	Cyno		eventCount	219
R2W1_D07932_Cy_F_Ebola VLPs.fcs	Basophils	Basophils	Singlets			Ebola VLPs	D07932	F	Cyno	Singlets	percent	0.16323427472552046
R2W1_D07932_Cy_F_Ebola VLPs.fcs	B Cells	B Cells	CD45+ CD66-			Ebola VLPs	D07932	F	Cyno		eventCount	2107
R2W1_D07932_Cy_F_Ebola VLPs.fcs	B Cells	B Cells	CD45+ CD66-			Ebola VLPs	D07932	F	Cyno	CD45+ CD66-	percent	3.142759124740838
R2W1_D07932_Cy_F_Ebola VLPs.fcs	CD1c+ B cells	CD1c+ B cells	B Cells			Ebola VLPs	D07932	F	Cyno		eventCount	106
R2W1_D07932_Cy_F_Ebola VLPs.fcs	CD1c+ B cells	CD1c+ B cells	B Cells			Ebola VLPs	D07932	F	Cyno	B Cells	percent	5.0308495491219745
R2W1_D07932_Cy_F_Ebola VLPs.fcs	CD7+/HLA-DR-	CD7+/HLA-DR-	CD19- CD3-			Ebola VLPs	D07932	F	Cyno		eventCount	3734
R2W1_D07932_Cy_F_Ebola VLPs.fcs	CD7+/HLA-DR-	CD7+/HLA-DR-	CD19- CD3-			Ebola VLPs	D07932	F	Cyno	CD19- CD3-	percent	20.341014326959744
R2W1_D07932_Cy_F_Ebola VLPs.fcs	pDCs	pDCs	HLA-DR+ CD11c-			Ebola VLPs	D07932	F	Cyno		eventCount	2
R2W1_D07932_Cy_F_Ebola VLPs.fcs	pDCs	pDCs	HLA-DR+ CD11c-			Ebola VLPs	D07932	F	Cyno	HLA-DR+ CD11c-	percent	0.0892458723784025
R2W1_D07932_Cy_F_Ebola VLPs.fcs	CD11b-/CD16-	CD11b-/CD16-	HLA-DR+/CD7-			Ebola VLPs	D07932	F	Cyno		eventCount	307
R2W1_D07932_Cy_F_Ebola VLPs.fcs	CD11b-/CD16-	CD11b-/CD16-	HLA-DR+/CD7-			Ebola VLPs	D07932	F	Cyno	HLA-DR+/CD7-	percent	9.155979719654042
R2W1_D07932_Cy_F_Ebola VLPs.fcs	CD11b+/CD16-	CD11b+/CD16-	HLA-DR+/CD7-			Ebola VLPs	D07932	F	Cyno		eventCount	2124
R2W1_D07932_Cy_F_Ebola VLPs.fcs	CD11b+/CD16-	CD11b+/CD16-	HLA-DR+/CD7-			Ebola VLPs	D07932	F	Cyno	HLA-DR+/CD7-	percent	63.34625708320907
R2W1_D07932_Cy_F_Ebola VLPs.fcs	CD16+/CD11b-	CD16+/CD11b-	HLA-DR+/CD7-			Ebola VLPs	D07932	F	Cyno		eventCount	394
R2W1_D07932_Cy_F_Ebola VLPs.fcs	CD16+/CD11b-	CD16+/CD11b-	HLA-DR+/CD7-			Ebola VLPs	D07932	F	Cyno	HLA-DR+/CD7-	percent	11.750671040858933
R2W1_D07932_Cy_F_Ebola VLPs.fcs	CD16+/CD11b+	CD16+/CD11b+	HLA-DR+/CD7-			Ebola VLPs	D07932	F	Cyno		eventCount	482
R2W1_D07932_Cy_F_Ebola VLPs.fcs	CD16+/CD11b+	CD16+/CD11b+	HLA-DR+/CD7-			Ebola VLPs	D07932	F	Cyno	HLA-DR+/CD7-	percent	14.375186400238592
R2W1_D07932_Cy_F_Ebola VLPs.fcs	Neutrophils	Neutrophils	Non-Basophils			Ebola VLPs	D07932	F	Cyno		eventCount	38819
R2W1_D07932_Cy_F_Ebola VLPs.fcs	Neutrophils	Neutrophils	Non-Basophils			Ebola VLPs	D07932	F	Cyno	Non-Basophils	percent	28.992986832572765
R2W1_D07932_Cy_F_Ebola VLPs.fcs	CD8+T cells	CD8+T cells	T Cells			Ebola VLPs	D07932	F	Cyno		eventCount	22836
R2W1_D07932_Cy_F_Ebola VLPs.fcs	CD8+T cells	CD8+T cells	T Cells			Ebola VLPs	D07932	F	Cyno	T Cells	percent	49.904936733757296
R2W1_D07932_Cy_F_Ebola VLPs.fcs	CD4+T cells	CD4+T cells	T Cells			Ebola VLPs	D07932	F	Cyno		eventCount	17051
R2W1_D07932_Cy_F_Ebola VLPs.fcs	CD4+T cells	CD4+T cells	T Cells			Ebola VLPs	D07932	F	Cyno	T Cells	percent	37.26261500469853
R2W1_D07932_Cy_F_Ebola VLPs.fcs	CD4+/CD8+	CD4+/CD8+	T Cells			Ebola VLPs	D07932	F	Cyno		eventCount	4231
R2W1_D07932_Cy_F_Ebola VLPs.fcs	CD4+/CD8+	CD4+/CD8+	T Cells			Ebola VLPs	D07932	F	Cyno	T Cells	percent	9.24626849362967
R2W1_D07932_Cy_F_CD40L.fcs	Basophils	Basophils	Singlets			CD40L	D07932	F	Cyno		eventCount	236
R2W1_D07932_Cy_F_CD40L.fcs	Basophils	Basophils	Singlets			CD40L	D07932	F	Cyno	Singlets	percent	0.14916599773722766
R2W1_D07932_Cy_F_CD40L.fcs	B Cells	B Cells	CD45+ CD66-			CD40L	D07932	F	Cyno		eventCount	2454
R2W1_D07932_Cy_F_CD40L.fcs	B Cells	B Cells	CD45+ CD66-			CD40L	D07932	F	Cyno	CD45+ CD66-	percent	3.2293722858270826
R2W1_D07932_Cy_F_CD40L.fcs	CD1c+ B cells	CD1c+ B cells	B Cells			CD40L	D07932	F	Cyno		eventCount	156
R2W1_D07932_Cy_F_CD40L.fcs	CD1c+ B cells	CD1c+ B cells	B Cells			CD40L	D07932	F	Cyno	B Cells	percent	6.356968215158925
R2W1_D07932_Cy_F_CD40L.fcs	CD7+/HLA-DR-	CD7+/HLA-DR-	CD19- CD3-			CD40L	D07932	F	Cyno		eventCount	4952
R2W1_D07932_Cy_F_CD40L.fcs	CD7+/HLA-DR-	CD7+/HLA-DR-	CD19- CD3-			CD40L	D07932	F	Cyno	CD19- CD3-	percent	24.47486779024366
R2W1_D07932_Cy_F_CD40L.fcs	pDCs	pDCs	HLA-DR+ CD11c-			CD40L	D07932	F	Cyno		eventCount	8
R2W1_D07932_Cy_F_CD40L.fcs	pDCs	pDCs	HLA-DR+ CD11c-			CD40L	D07932	F	Cyno	HLA-DR+ CD11c-	percent	0.33812341504649196
R2W1_D07932_Cy_F_CD40L.fcs	CD11b-/CD16-	CD11b-/CD16-	HLA-DR+/CD7-			CD40L	D07932	F	Cyno		eventCount	330
R2W1_D07932_Cy_F_CD40L.fcs	CD11b-/CD16-	CD11b-/CD16-	HLA-DR+/CD7-			CD40L	D07932	F	Cyno	HLA-DR+/CD7-	percent	9.504608294930875
R2W1_D07932_Cy_F_CD40L.fcs	CD11b+/CD16-	CD11b+/CD16-	HLA-DR+/CD7-			CD40L	D07932	F	Cyno		eventCount	2231
R2W1_D07932_Cy_F_CD40L.fcs	CD11b+/CD16-	CD11b+/CD16-	HLA-DR+/CD7-			CD40L	D07932	F	Cyno	HLA-DR+/CD7-	percent	64.25691244239631
R2W1_D07932_Cy_F_CD40L.fcs	CD16+/CD11b-	CD16+/CD11b-	HLA-DR+/CD7-			CD40L	D07932	F	Cyno		eventCount	422
R2W1_D07932_Cy_F_CD40L.fcs	CD16+/CD11b-	CD16+/CD11b-	HLA-DR+/CD7-			CD40L	D07932	F	Cyno	HLA-DR+/CD7-	percent	12.154377880184331
R2W1_D07932_Cy_F_CD40L.fcs	CD16+/CD11b+	CD16+/CD11b+	HLA-DR+/CD7-			CD40L	D07932	F	Cyno		eventCount	446
R2W1_D07932_Cy_F_CD40L.fcs	CD16+/CD11b+	CD16+/CD11b+	HLA-DR+/CD7-			CD40L	D07932	F	Cyno	HLA-DR+/CD7-	percent	12.845622119815669
R2W1_D07932_Cy_F_CD40L.fcs	Neutrophils	Neutrophils	Non-Basophils			CD40L	D07932	F	Cyno		eventCount	45455
R2W1_D07932_Cy_F_CD40L.fcs	Neutrophils	Neutrophils	Non-Basophils			CD40L	D07932	F	Cyno	Non-Basophils	percent	28.789577355957107
R2W1_D07932_Cy_F_CD40L.fcs	CD8+T cells	CD8+T cells	T Cells			CD40L	D07932	F	Cyno		eventCount	24976
R2W1_D07932_Cy_F_CD40L.fcs	CD8+T cells	CD8+T cells	T Cells			CD40L	D07932	F	Cyno	T Cells	percent	48.32536810943637
R2W1_D07932_Cy_F_CD40L.fcs	CD4+T cells	CD4+T cells	T Cells			CD40L	D07932	F	Cyno		eventCount	19227
R2W1_D07932_Cy_F_CD40L.fcs	CD4+T cells	CD4+T cells	T Cells			CD40L	D07932	F	Cyno	T Cells	percent	37.201787821914365
R2W1_D07932_Cy_F_CD40L.fcs	CD4+/CD8+	CD4+/CD8+	T Cells			CD40L	D07932	F	Cyno		eventCount	5535
R2W1_D07932_Cy_F_CD40L.fcs	CD4+/CD8+	CD4+/CD8+	T Cells			CD40L	D07932	F	Cyno	T Cells	percent	10.709517636360118
R2W1_D07932_Cy_F_Basal.fcs	Basophils	Basophils	Singlets			Basal	D07932	F	Cyno		eventCount	183
R2W1_D07932_Cy_F_Basal.fcs	Basophils	Basophils	Singlets			Basal	D07932	F	Cyno	Singlets	percent	0.1302732178196677
R2W1_D07932_Cy_F_Basal.fcs	B Cells	B Cells	CD45+ CD66-			Basal	D07932	F	Cyno		eventCount	2604
R2W1_D07932_Cy_F_Basal.fcs	B Cells	B Cells	CD45+ CD66-			Basal	D07932	F	Cyno	CD45+ CD66-	percent	3.549569934979076
R2W1_D07932_Cy_F_Basal.fcs	CD1c+ B cells	CD1c+ B cells	B Cells			Basal	D07932	F	Cyno		eventCount	119
R2W1_D07932_Cy_F_Basal.fcs	CD1c+ B cells	CD1c+ B cells	B Cells			Basal	D07932	F	Cyno	B Cells	percent	4.56989247311828
R2W1_D07932_Cy_F_Basal.fcs	CD7+/HLA-DR-	CD7+/HLA-DR-	CD19- CD3-			Basal	D07932	F	Cyno		eventCount	4304
R2W1_D07932_Cy_F_Basal.fcs	CD7+/HLA-DR-	CD7+/HLA-DR-	CD19- CD3-			Basal	D07932	F	Cyno	CD19- CD3-	percent	21.74396281701526
R2W1_D07932_Cy_F_Basal.fcs	pDCs	pDCs	HLA-DR+ CD11c-			Basal	D07932	F	Cyno		eventCount	6
R2W1_D07932_Cy_F_Basal.fcs	pDCs	pDCs	HLA-DR+ CD11c-			Basal	D07932	F	Cyno	HLA-DR+ CD11c-	percent	0.29282576866764276
R2W1_D07932_Cy_F_Basal.fcs	CD11b-/CD16-	CD11b-/CD16-	HLA-DR+/CD7-			Basal	D07932	F	Cyno		eventCount	315
R2W1_D07932_Cy_F_Basal.fcs	CD11b-/CD16-	CD11b-/CD16-	HLA-DR+/CD7-			Basal	D07932	F	Cyno	HLA-DR+/CD7-	percent	10.180995475113122
R2W1_D07932_Cy_F_Basal.fcs	CD11b+/CD16-	CD11b+/CD16-	HLA-DR+/CD7-			Basal	D07932	F	Cyno		eventCount	1905
R2W1_D07932_Cy_F_Basal.fcs	CD11b+/CD16-	CD11b+/CD16-	HLA-DR+/CD7-			Basal	D07932	F	Cyno	HLA-DR+/CD7-	percent	61.570782159017455
R2W1_D07932_Cy_F_Basal.fcs	CD16+/CD11b-	CD16+/CD11b-	HLA-DR+/CD7-			Basal	D07932	F	Cyno		eventCount	420
R2W1_D07932_Cy_F_Basal.fcs	CD16+/CD11b-	CD16+/CD11b-	HLA-DR+/CD7-			Basal	D07932	F	Cyno	HLA-DR+/CD7-	percent	13.574660633484163
R2W1_D07932_Cy_F_Basal.fcs	CD16+/CD11b+	CD16+/CD11b+	HLA-DR+/CD7-			Basal	D07932	F	Cyno		eventCount	419
R2W1_D07932_Cy_F_Basal.fcs	CD16+/CD11b+	CD16+/CD11b+	HLA-DR+/CD7-			Basal	D07932	F	Cyno	HLA-DR+/CD7-	percent	13.542340012928248
R2W1_D07932_Cy_F_Basal.fcs	Neutrophils	Neutrophils	Non-Basophils			Basal	D07932	F	Cyno		eventCount	37272
R2W1_D07932_Cy_F_Basal.fcs	Neutrophils	Neutrophils	Non-Basophils			Basal	D07932	F	Cyno	Non-Basophils	percent	26.579759960635254
R2W1_D07932_Cy_F_Basal.fcs	CD8+T cells	CD8+T cells	T Cells			Basal	D07932	F	Cyno		eventCount	24129
R2W1_D07932_Cy_F_Basal.fcs	CD8+T cells	CD8+T cells	T Cells			Basal	D07932	F	Cyno	T Cells	percent	48.41777866960971
R2W1_D07932_Cy_F_Basal.fcs	CD4+T cells	CD4+T cells	T Cells			Basal	D07932	F	Cyno		eventCount	19063
R2W1_D07932_Cy_F_Basal.fcs	CD4+T cells	CD4+T cells	T Cells			Basal	D07932	F	Cyno	T Cells	percent	38.252232366810475
R2W1_D07932_Cy_F_Basal.fcs	CD4+/CD8+	CD4+/CD8+	T Cells			Basal	D07932	F	Cyno		eventCount	4599
R2W1_D07932_Cy_F_Basal.fcs	CD4+/CD8+	CD4+/CD8+	T Cells			Basal	D07932	F	Cyno	T Cells	percent	9.228453897862948
R2W1_D07932_Cy_F_Anthrax.fcs	Basophils	Basophils	Singlets			Anthrax	D07932	F	Cyno		eventCount	314
R2W1_D07932_Cy_F_Anthrax.fcs	Basophils	Basophils	Singlets			Anthrax	D07932	F	Cyno	Singlets	percent	0.15727995832581995
R2W1_D07932_Cy_F_Anthrax.fcs	B Cells	B Cells	CD45+ CD66-			Anthrax	D07932	F	Cyno		eventCount	3280
R2W1_D07932_Cy_F_Anthrax.fcs	B Cells	B Cells	CD45+ CD66-			Anthrax	D07932	F	Cyno	CD45+ CD66-	percent	3.274956566886994
R2W1_D07932_Cy_F_Anthrax.fcs	CD1c+ B cells	CD1c+ B cells	B Cells			Anthrax	D07932	F	Cyno		eventCount	145
R2W1_D07932_Cy_F_Anthrax.fcs	CD1c+ B cells	CD1c+ B cells	B Cells			Anthrax	D07932	F	Cyno	B Cells	percent	4.420731707317073
R2W1_D07932_Cy_F_Anthrax.fcs	CD7+/HLA-DR-	CD7+/HLA-DR-	CD19- CD3-			Anthrax	D07932	F	Cyno		eventCount	8401
R2W1_D07932_Cy_F_Anthrax.fcs	CD7+/HLA-DR-	CD7+/HLA-DR-	CD19- CD3-			Anthrax	D07932	F	Cyno	CD19- CD3-	percent	27.51088843042866
R2W1_D07932_Cy_F_Anthrax.fcs	pDCs	pDCs	HLA-DR+ CD11c-			Anthrax	D07932	F	Cyno		eventCount	10
R2W1_D07932_Cy_F_Anthrax.fcs	pDCs	pDCs	HLA-DR+ CD11c-			Anthrax	D07932	F	Cyno	HLA-DR+ CD11c-	percent	0.40064102564102566
R2W1_D07932_Cy_F_Anthrax.fcs	CD11b-/CD16-	CD11b-/CD16-	HLA-DR+/CD7-			Anthrax	D07932	F	Cyno		eventCount	379
R2W1_D07932_Cy_F_Anthrax.fcs	CD11b-/CD16-	CD11b-/CD16-	HLA-DR+/CD7-			Anthrax	D07932	F	Cyno	HLA-DR+/CD7-	percent	10.177228786251343
R2W1_D07932_Cy_F_Anthrax.fcs	CD11b+/CD16-	CD11b+/CD16-	HLA-DR+/CD7-			Anthrax	D07932	F	Cyno		eventCount	2363
R2W1_D07932_Cy_F_Anthrax.fcs	CD11b+/CD16-	CD11b+/CD16-	HLA-DR+/CD7-			Anthrax	D07932	F	Cyno	HLA-DR+/CD7-	percent	63.45327604726101
R2W1_D07932_Cy_F_Anthrax.fcs	CD16+/CD11b-	CD16+/CD11b-	HLA-DR+/CD7-			Anthrax	D07932	F	Cyno		eventCount	442
R2W1_D07932_Cy_F_Anthrax.fcs	CD16+/CD11b-	CD16+/CD11b-	HLA-DR+/CD7-			Anthrax	D07932	F	Cyno	HLA-DR+/CD7-	percent	11.868958109559614
R2W1_D07932_Cy_F_Anthrax.fcs	CD16+/CD11b+	CD16+/CD11b+	HLA-DR+/CD7-			Anthrax	D07932	F	Cyno		eventCount	495
R2W1_D07932_Cy_F_Anthrax.fcs	CD16+/CD11b+	CD16+/CD11b+	HLA-DR+/CD7-			Anthrax	D07932	F	Cyno	HLA-DR+/CD7-	percent	13.292158968850698
R2W1_D07932_Cy_F_Anthrax.fcs	Neutrophils	Neutrophils	Non-Basophils			Anthrax	D07932	F	Cyno		eventCount	44938
R2W1_D07932_Cy_F_Anthrax.fcs	Neutrophils	Neutrophils	Non-Basophils			Anthrax	D07932	F	Cyno	Non-Basophils	percent	22.563541237786325
R2W1_D07932_Cy_F_Anthrax.fcs	CD8+T cells	CD8+T cells	T Cells			Anthrax	D07932	F	Cyno		eventCount	29912
R2W1_D07932_Cy_F_Anthrax.fcs	CD8+T cells	CD8+T cells	T Cells			Anthrax	D07932	F	Cyno	T Cells	percent	47.20959595959596
R2W1_D07932_Cy_F_Anthrax.fcs	CD4+T cells	CD4+T cells	T Cells			Anthrax	D07932	F	Cyno		eventCount	23844
R2W1_D07932_Cy_F_Anthrax.fcs	CD4+T cells	CD4+T cells	T Cells			Anthrax	D07932	F	Cyno	T Cells	percent	37.63257575757576
R2W1_D07932_Cy_F_Anthrax.fcs	CD4+/CD8+	CD4+/CD8+	T Cells			Anthrax	D07932	F	Cyno		eventCount	6998
R2W1_D07932_Cy_F_Anthrax.fcs	CD4+/CD8+	CD4+/CD8+	T Cells			Anthrax	D07932	F	Cyno	T Cells	percent	11.044823232323232
R2W3_D00602_Rh_F_TNFa.fcs	Basophils	Basophils	Singlets			TNFa	D00602	F	Rhesus		eventCount	281
R2W3_D00602_Rh_F_TNFa.fcs	Basophils	Basophils	Singlets			TNFa	D00602	F	Rhesus	Singlets	percent	0.19968874139242035
R2W3_D00602_Rh_F_TNFa.fcs	B Cells	B Cells	CD45+ CD66-			TNFa	D00602	F	Rhesus		eventCount	5575
R2W3_D00602_Rh_F_TNFa.fcs	B Cells	B Cells	CD45+ CD66-			TNFa	D00602	F	Rhesus	CD45+ CD66-	percent	6.085248048900289
R2W3_D00602_Rh_F_TNFa.fcs	CD1c+ B cells	CD1c+ B cells	B Cells			TNFa	D00602	F	Rhesus		eventCount	1473
R2W3_D00602_Rh_F_TNFa.fcs	CD1c+ B cells	CD1c+ B cells	B Cells			TNFa	D00602	F	Rhesus	B Cells	percent	26.42152466367713
R2W3_D00602_Rh_F_TNFa.fcs	CD7+/HLA-DR-	CD7+/HLA-DR-	CD19- CD3-			TNFa	D00602	F	Rhesus		eventCount	9242
R2W3_D00602_Rh_F_TNFa.fcs	CD7+/HLA-DR-	CD7+/HLA-DR-	CD19- CD3-			TNFa	D00602	F	Rhesus	CD19- CD3-	percent	66.00014282653717
R2W3_D00602_Rh_F_TNFa.fcs	pDCs	pDCs	HLA-DR+ CD11c-			TNFa	D00602	F	Rhesus		eventCount	29
R2W3_D00602_Rh_F_TNFa.fcs	pDCs	pDCs	HLA-DR+ CD11c-			TNFa	D00602	F	Rhesus	HLA-DR+ CD11c-	percent	2.1936459909228443
R2W3_D00602_Rh_F_TNFa.fcs	CD11b-/CD16-	CD11b-/CD16-	HLA-DR+/CD7-			TNFa	D00602	F	Rhesus		eventCount	564
R2W3_D00602_Rh_F_TNFa.fcs	CD11b-/CD16-	CD11b-/CD16-	HLA-DR+/CD7-			TNFa	D00602	F	Rhesus	HLA-DR+/CD7-	percent	16.091298145506418
R2W3_D00602_Rh_F_TNFa.fcs	CD11b+/CD16-	CD11b+/CD16-	HLA-DR+/CD7-			TNFa	D00602	F	Rhesus		eventCount	1250
R2W3_D00602_Rh_F_TNFa.fcs	CD11b+/CD16-	CD11b+/CD16-	HLA-DR+/CD7-			TNFa	D00602	F	Rhesus	HLA-DR+/CD7-	percent	35.66333808844508
R2W3_D00602_Rh_F_TNFa.fcs	CD16+/CD11b-	CD16+/CD11b-	HLA-DR+/CD7-			TNFa	D00602	F	Rhesus		eventCount	1427
R2W3_D00602_Rh_F_TNFa.fcs	CD16+/CD11b-	CD16+/CD11b-	HLA-DR+/CD7-			TNFa	D00602	F	Rhesus	HLA-DR+/CD7-	percent	40.7132667617689
R2W3_D00602_Rh_F_TNFa.fcs	CD16+/CD11b+	CD16+/CD11b+	HLA-DR+/CD7-			TNFa	D00602	F	Rhesus		eventCount	231
R2W3_D00602_Rh_F_TNFa.fcs	CD16+/CD11b+	CD16+/CD11b+	HLA-DR+/CD7-			TNFa	D00602	F	Rhesus	HLA-DR+/CD7-	percent	6.59058487874465
R2W3_D00602_Rh_F_TNFa.fcs	Neutrophils	Neutrophils	Non-Basophils			TNFa	D00602	F	Rhesus		eventCount	36509
R2W3_D00602_Rh_F_TNFa.fcs	Neutrophils	Neutrophils	Non-Basophils			TNFa	D00602	F	Rhesus	Non-Basophils	percent	26.005413490989387
R2W3_D00602_Rh_F_TNFa.fcs	CD8+T cells	CD8+T cells	T Cells			TNFa	D00602	F	Rhesus		eventCount	29064
R2W3_D00602_Rh_F_TNFa.fcs	CD8+T cells	CD8+T cells	T Cells			TNFa	D00602	F	Rhesus	T Cells	percent	41.12345242306332
R2W3_D00602_Rh_F_TNFa.fcs	CD4+T cells	CD4+T cells	T Cells			TNFa	D00602	F	Rhesus		eventCount	25088
R2W3_D00602_Rh_F_TNFa.fcs	CD4+T cells	CD4+T cells	T Cells			TNFa	D00602	F	Rhesus	T Cells	percent	35.497700742836926
R2W3_D00602_Rh_F_TNFa.fcs	CD4+/CD8+	CD4+/CD8+	T Cells			TNFa	D00602	F	Rhesus		eventCount	10963
R2W3_D00602_Rh_F_TNFa.fcs	CD4+/CD8+	CD4+/CD8+	T Cells			TNFa	D00602	F	Rhesus	T Cells	percent	15.511850017686594
R2W3_D00602_Rh_F_R848.fcs	Basophils	Basophils	Singlets			R848	D00602	F	Rhesus		eventCount	314
R2W3_D00602_Rh_F_R848.fcs	Basophils	Basophils	Singlets			R848	D00602	F	Rhesus	Singlets	percent	0.17160439176080317
R2W3_D00602_Rh_F_R848.fcs	B Cells	B Cells	CD45+ CD66-			R848	D00602	F	Rhesus		eventCount	5836
R2W3_D00602_Rh_F_R848.fcs	B Cells	B Cells	CD45+ CD66-			R848	D00602	F	Rhesus	CD45+ CD66-	percent	5.921386391769314
R2W3_D00602_Rh_F_R848.fcs	CD1c+ B cells	CD1c+ B cells	B Cells			R848	D00602	F	Rhesus		eventCount	479
R2W3_D00602_Rh_F_R848.fcs	CD1c+ B cells	CD1c+ B cells	B Cells			R848	D00602	F	Rhesus	B Cells	percent	8.207676490747087
R2W3_D00602_Rh_F_R848.fcs	CD7+/HLA-DR-	CD7+/HLA-DR-	CD19- CD3-			R848	D00602	F	Rhesus		eventCount	10333
R2W3_D00602_Rh_F_R848.fcs	CD7+/HLA-DR-	CD7+/HLA-DR-	CD19- CD3-			R848	D00602	F	Rhesus	CD19- CD3-	percent	69.74687816402295
R2W3_D00602_Rh_F_R848.fcs	pDCs	pDCs	HLA-DR+ CD11c-			R848	D00602	F	Rhesus		eventCount	40
R2W3_D00602_Rh_F_R848.fcs	pDCs	pDCs	HLA-DR+ CD11c-			R848	D00602	F	Rhesus	HLA-DR+ CD11c-	percent	3.9138943248532287
R2W3_D00602_Rh_F_R848.fcs	CD11b-/CD16-	CD11b-/CD16-	HLA-DR+/CD7-			R848	D00602	F	Rhesus		eventCount	620
R2W3_D00602_Rh_F_R848.fcs	CD11b-/CD16-	CD11b-/CD16-	HLA-DR+/CD7-			R848	D00602	F	Rhesus	HLA-DR+/CD7-	percent	20.182291666666668
R2W3_D00602_Rh_F_R848.fcs	CD11b+/CD16-	CD11b+/CD16-	HLA-DR+/CD7-			R848	D00602	F	Rhesus		eventCount	934
R2W3_D00602_Rh_F_R848.fcs	CD11b+/CD16-	CD11b+/CD16-	HLA-DR+/CD7-			R848	D00602	F	Rhesus	HLA-DR+/CD7-	percent	30.403645833333332
R2W3_D00602_Rh_F_R848.fcs	CD16+/CD11b-	CD16+/CD11b-	HLA-DR+/CD7-			R848	D00602	F	Rhesus		eventCount	1280
R2W3_D00602_Rh_F_R848.fcs	CD16+/CD11b-	CD16+/CD11b-	HLA-DR+/CD7-			R848	D00602	F	Rhesus	HLA-DR+/CD7-	percent	41.666666666666664
R2W3_D00602_Rh_F_R848.fcs	CD16+/CD11b+	CD16+/CD11b+	HLA-DR+/CD7-			R848	D00602	F	Rhesus		eventCount	203
R2W3_D00602_Rh_F_R848.fcs	CD16+/CD11b+	CD16+/CD11b+	HLA-DR+/CD7-			R848	D00602	F	Rhesus	HLA-DR+/CD7-	percent	6.608072916666667
R2W3_D00602_Rh_F_R848.fcs	Neutrophils	Neutrophils	Non-Basophils			R848	D00602	F	Rhesus		eventCount	46024
R2W3_D00602_Rh_F_R848.fcs	Neutrophils	Neutrophils	Non-Basophils			R848	D00602	F	Rhesus	Non-Basophils	percent	25.20550946082861
R2W3_D00602_Rh_F_R848.fcs	CD8+T cells	CD8+T cells	T Cells			R848	D00602	F	Rhesus		eventCount	30314
R2W3_D00602_Rh_F_R848.fcs	CD8+T cells	CD8+T cells	T Cells			R848	D00602	F	Rhesus	T Cells	percent	39.83495183905176
R2W3_D00602_Rh_F_R848.fcs	CD4+T cells	CD4+T cells	T Cells			R848	D00602	F	Rhesus		eventCount	27557
R2W3_D00602_Rh_F_R848.fcs	CD4+T cells	CD4+T cells	T Cells			R848	D00602	F	Rhesus	T Cells	percent	36.212039580020765
R2W3_D00602_Rh_F_R848.fcs	CD4+/CD8+	CD4+/CD8+	T Cells			R848	D00602	F	Rhesus		eventCount	12383
R2W3_D00602_Rh_F_R848.fcs	CD4+/CD8+	CD4+/CD8+	T Cells			R848	D00602	F	Rhesus	T Cells	percent	16.272224339347428
R2W3_D00602_Rh_F_PMAIono.fcs	Basophils	Basophils	Singlets			PMAIono	D00602	F	Rhesus		eventCount	279
R2W3_D00602_Rh_F_PMAIono.fcs	Basophils	Basophils	Singlets			PMAIono	D00602	F	Rhesus	Singlets	percent	0.18233625681310206
R2W3_D00602_Rh_F_PMAIono.fcs	B Cells	B Cells	CD45+ CD66-			PMAIono	D00602	F	Rhesus		eventCount	5771
R2W3_D00602_Rh_F_PMAIono.fcs	B Cells	B Cells	CD45+ CD66-			PMAIono	D00602	F	Rhesus	CD45+ CD66-	percent	6.073138647724283
R2W3_D00602_Rh_F_PMAIono.fcs	CD1c+ B cells	CD1c+ B cells	B Cells			PMAIono	D00602	F	Rhesus		eventCount	1381
R2W3_D00602_Rh_F_PMAIono.fcs	CD1c+ B cells	CD1c+ B cells	B Cells			PMAIono	D00602	F	Rhesus	B Cells	percent	23.929994801594177
R2W3_D00602_Rh_F_PMAIono.fcs	CD7+/HLA-DR-	CD7+/HLA-DR-	CD19- CD3-			PMAIono	D00602	F	Rhesus		eventCount	9892
R2W3_D00602_Rh_F_PMAIono.fcs	CD7+/HLA-DR-	CD7+/HLA-DR-	CD19- CD3-			PMAIono	D00602	F	Rhesus	CD19- CD3-	percent	67.88361240735658
R2W3_D00602_Rh_F_PMAIono.fcs	pDCs	pDCs	HLA-DR+ CD11c-			PMAIono	D00602	F	Rhesus		eventCount	42
R2W3_D00602_Rh_F_PMAIono.fcs	pDCs	pDCs	HLA-DR+ CD11c-			PMAIono	D00602	F	Rhesus	HLA-DR+ CD11c-	percent	4.026845637583893
R2W3_D00602_Rh_F_PMAIono.fcs	CD11b-/CD16-	CD11b-/CD16-	HLA-DR+/CD7-			PMAIono	D00602	F	Rhesus		eventCount	568
R2W3_D00602_Rh_F_PMAIono.fcs	CD11b-/CD16-	CD11b-/CD16-	HLA-DR+/CD7-			PMAIono	D00602	F	Rhesus	HLA-DR+/CD7-	percent	17.15493808517064
R2W3_D00602_Rh_F_PMAIono.fcs	CD11b+/CD16-	CD11b+/CD16-	HLA-DR+/CD7-			PMAIono	D00602	F	Rhesus		eventCount	962
R2W3_D00602_Rh_F_PMAIono.fcs	CD11b+/CD16-	CD11b+/CD16-	HLA-DR+/CD7-			PMAIono	D00602	F	Rhesus	HLA-DR+/CD7-	percent	29.05466626396859
R2W3_D00602_Rh_F_PMAIono.fcs	CD16+/CD11b-	CD16+/CD11b-	HLA-DR+/CD7-			PMAIono	D00602	F	Rhesus		eventCount	1504
R2W3_D00602_Rh_F_PMAIono.fcs	CD16+/CD11b-	CD16+/CD11b-	HLA-DR+/CD7-			PMAIono	D00602	F	Rhesus	HLA-DR+/CD7-	percent	45.4243430987617
R2W3_D00602_Rh_F_PMAIono.fcs	CD16+/CD11b+	CD16+/CD11b+	HLA-DR+/CD7-			PMAIono	D00602	F	Rhesus		eventCount	242
R2W3_D00602_Rh_F_PMAIono.fcs	CD16+/CD11b+	CD16+/CD11b+	HLA-DR+/CD7-			PMAIono	D00602	F	Rhesus	HLA-DR+/CD7-	percent	7.308970099667774
R2W3_D00602_Rh_F_PMAIono.fcs	Neutrophils	Neutrophils	Non-Basophils			PMAIono	D00602	F	Rhesus		eventCount	38312
R2W3_D00602_Rh_F_PMAIono.fcs	Neutrophils	Neutrophils	Non-Basophils			PMAIono	D00602	F	Rhesus	Non-Basophils	percent	25.091361582290915
R2W3_D00602_Rh_F_PMAIono.fcs	CD8+T cells	CD8+T cells	T Cells			PMAIono	D00602	F	Rhesus		eventCount	29678
R2W3_D00602_Rh_F_PMAIono.fcs	CD8+T cells	CD8+T cells	T Cells			PMAIono	D00602	F	Rhesus	T Cells	percent	40.42828536010571
R2W3_D00602_Rh_F_PMAIono.fcs	CD4+T cells	CD4+T cells	T Cells			PMAIono	D00602	F	Rhesus		eventCount	26948
R2W3_D00602_Rh_F_PMAIono.fcs	CD4+T cells	CD4+T cells	T Cells			PMAIono	D00602	F	Rhesus	T Cells	percent	36.7093953057527
R2W3_D00602_Rh_F_PMAIono.fcs	CD4+/CD8+	CD4+/CD8+	T Cells			PMAIono	D00602	F	Rhesus		eventCount	10899
R2W3_D00602_Rh_F_PMAIono.fcs	CD4+/CD8+	CD4+/CD8+	T Cells			PMAIono	D00602	F	Rhesus	T Cells	percent	14.846953370840088
R2W3_D00602_Rh_F_LPS.fcs	Basophils	Basophils	Singlets			LPS	D00602	F	Rhesus		eventCount	328
R2W3_D00602_Rh_F_LPS.fcs	Basophils	Basophils	Singlets			LPS	D00602	F	Rhesus	Singlets	percent	0.21163338387585895
R2W3_D00602_Rh_F_LPS.fcs	B Cells	B Cells	CD45+ CD66-			LPS	D00602	F	Rhesus		eventCount	5345
R2W3_D00602_Rh_F_LPS.fcs	B Cells	B Cells	CD45+ CD66-			LPS	D00602	F	Rhesus	CD45+ CD66-	percent	6.117590504858591
R2W3_D00602_Rh_F_LPS.fcs	CD1c+ B cells	CD1c+ B cells	B Cells			LPS	D00602	F	Rhesus		eventCount	637
R2W3_D00602_Rh_F_LPS.fcs	CD1c+ B cells	CD1c+ B cells	B Cells			LPS	D00602	F	Rhesus	B Cells	percent	11.917680074836296
R2W3_D00602_Rh_F_LPS.fcs	CD7+/HLA-DR-	CD7+/HLA-DR-	CD19- CD3-			LPS	D00602	F	Rhesus		eventCount	9087
R2W3_D00602_Rh_F_LPS.fcs	CD7+/HLA-DR-	CD7+/HLA-DR-	CD19- CD3-			LPS	D00602	F	Rhesus	CD19- CD3-	percent	69.16577865732988
R2W3_D00602_Rh_F_LPS.fcs	pDCs	pDCs	HLA-DR+ CD11c-			LPS	D00602	F	Rhesus		eventCount	29
R2W3_D00602_Rh_F_LPS.fcs	pDCs	pDCs	HLA-DR+ CD11c-			LPS	D00602	F	Rhesus	HLA-DR+ CD11c-	percent	3.3410138248847927
R2W3_D00602_Rh_F_LPS.fcs	CD11b-/CD16-	CD11b-/CD16-	HLA-DR+/CD7-			LPS	D00602	F	Rhesus		eventCount	558
R2W3_D00602_Rh_F_LPS.fcs	CD11b-/CD16-	CD11b-/CD16-	HLA-DR+/CD7-			LPS	D00602	F	Rhesus	HLA-DR+/CD7-	percent	19.57894736842105
R2W3_D00602_Rh_F_LPS.fcs	CD11b+/CD16-	CD11b+/CD16-	HLA-DR+/CD7-			LPS	D00602	F	Rhesus		eventCount	799
R2W3_D00602_Rh_F_LPS.fcs	CD11b+/CD16-	CD11b+/CD16-	HLA-DR+/CD7-			LPS	D00602	F	Rhesus	HLA-DR+/CD7-	percent	28.035087719298247
R2W3_D00602_Rh_F_LPS.fcs	CD16+/CD11b-	CD16+/CD11b-	HLA-DR+/CD7-			LPS	D00602	F	Rhesus		eventCount	1278
R2W3_D00602_Rh_F_LPS.fcs	CD16+/CD11b-	CD16+/CD11b-	HLA-DR+/CD7-			LPS	D00602	F	Rhesus	HLA-DR+/CD7-	percent	44.8421052631579
R2W3_D00602_Rh_F_LPS.fcs	CD16+/CD11b+	CD16+/CD11b+	HLA-DR+/CD7-			LPS	D00602	F	Rhesus		eventCount	194
R2W3_D00602_Rh_F_LPS.fcs	CD16+/CD11b+	CD16+/CD11b+	HLA-DR+/CD7-			LPS	D00602	F	Rhesus	HLA-DR+/CD7-	percent	6.807017543859649
R2W3_D00602_Rh_F_LPS.fcs	Neutrophils	Neutrophils	Non-Basophils			LPS	D00602	F	Rhesus		eventCount	40324
R2W3_D00602_Rh_F_LPS.fcs	Neutrophils	Neutrophils	Non-Basophils			LPS	D00602	F	Rhesus	Non-Basophils	percent	26.082288183282344
R2W3_D00602_Rh_F_LPS.fcs	CD8+T cells	CD8+T cells	T Cells			LPS	D00602	F	Rhesus		eventCount	27080
R2W3_D00602_Rh_F_LPS.fcs	CD8+T cells	CD8+T cells	T Cells			LPS	D00602	F	Rhesus	T Cells	percent	40.06272746101725
R2W3_D00602_Rh_F_LPS.fcs	CD4+T cells	CD4+T cells	T Cells			LPS	D00602	F	Rhesus		eventCount	24644
R2W3_D00602_Rh_F_LPS.fcs	CD4+T cells	CD4+T cells	T Cells			LPS	D00602	F	Rhesus	T Cells	percent	36.458857295026185
R2W3_D00602_Rh_F_LPS.fcs	CD4+/CD8+	CD4+/CD8+	T Cells			LPS	D00602	F	Rhesus		eventCount	10687
R2W3_D00602_Rh_F_LPS.fcs	CD4+/CD8+	CD4+/CD8+	T Cells			LPS	D00602	F	Rhesus	T Cells	percent	15.810574903097908
R2W3_D00602_Rh_F_IL-12.fcs	Basophils	Basophils	Singlets			IL-12	D00602	F	Rhesus		eventCount	462
R2W3_D00602_Rh_F_IL-12.fcs	Basophils	Basophils	Singlets			IL-12	D00602	F	Rhesus	Singlets	percent	0.20120636717984453
R2W3_D00602_Rh_F_IL-12.fcs	B Cells	B Cells	CD45+ CD66-			IL-12	D00602	F	Rhesus		eventCount	7171
R2W3_D00602_Rh_F_IL-12.fcs	B Cells	B Cells	CD45+ CD66-			IL-12	D00602	F	Rhesus	CD45+ CD66-	percent	5.777938925147047
R2W3_D00602_Rh_F_IL-12.fcs	CD1c+ B cells	CD1c+ B cells	B Cells			IL-12	D00602	F	Rhesus		eventCount	1710
R2W3_D00602_Rh_F_IL-12.fcs	CD1c+ B cells	CD1c+ B cells	B Cells			IL-12	D00602	F	Rhesus	B Cells	percent	23.846046576488636
R2W3_D00602_Rh_F_IL-12.fcs	CD7+/HLA-DR-	CD7+/HLA-DR-	CD19- CD3-			IL-12	D00602	F	Rhesus		eventCount	13439
R2W3_D00602_Rh_F_IL-12.fcs	CD7+/HLA-DR-	CD7+/HLA-DR-	CD19- CD3-			IL-12	D00602	F	Rhesus	CD19- CD3-	percent	66.88066089379915
R2W3_D00602_Rh_F_IL-12.fcs	pDCs	pDCs	HLA-DR+ CD11c-			IL-12	D00602	F	Rhesus		eventCount	61
R2W3_D00602_Rh_F_IL-12.fcs	pDCs	pDCs	HLA-DR+ CD11c-			IL-12	D00602	F	Rhesus	HLA-DR+ CD11c-	percent	3.7423312883435584
R2W3_D00602_Rh_F_IL-12.fcs	CD11b-/CD16-	CD11b-/CD16-	HLA-DR+/CD7-			IL-12	D00602	F	Rhesus		eventCount	722
R2W3_D00602_Rh_F_IL-12.fcs	CD11b-/CD16-	CD11b-/CD16-	HLA-DR+/CD7-			IL-12	D00602	F	Rhesus	HLA-DR+/CD7-	percent	15.500214684413912
R2W3_D00602_Rh_F_IL-12.fcs	CD11b+/CD16-	CD11b+/CD16-	HLA-DR+/CD7-			IL-12	D00602	F	Rhesus		eventCount	1625
R2W3_D00602_Rh_F_IL-12.fcs	CD11b+/CD16-	CD11b+/CD16-	HLA-DR+/CD7-			IL-12	D00602	F	Rhesus	HLA-DR+/CD7-	percent	34.88621726062688
R2W3_D00602_Rh_F_IL-12.fcs	CD16+/CD11b-	CD16+/CD11b-	HLA-DR+/CD7-			IL-12	D00602	F	Rhesus		eventCount	1935
R2W3_D00602_Rh_F_IL-12.fcs	CD16+/CD11b-	CD16+/CD11b-	HLA-DR+/CD7-			IL-12	D00602	F	Rhesus	HLA-DR+/CD7-	percent	41.54143409188493
R2W3_D00602_Rh_F_IL-12.fcs	CD16+/CD11b+	CD16+/CD11b+	HLA-DR+/CD7-			IL-12	D00602	F	Rhesus		eventCount	330
R2W3_D00602_Rh_F_IL-12.fcs	CD16+/CD11b+	CD16+/CD11b+	HLA-DR+/CD7-			IL-12	D00602	F	Rhesus	HLA-DR+/CD7-	percent	7.084585659081151
R2W3_D00602_Rh_F_IL-12.fcs	Neutrophils	Neutrophils	Non-Basophils			IL-12	D00602	F	Rhesus		eventCount	57286
R2W3_D00602_Rh_F_IL-12.fcs	Neutrophils	Neutrophils	Non-Basophils			IL-12	D00602	F	Rhesus	Non-Basophils	percent	25.009604638167087
R2W3_D00602_Rh_F_IL-12.fcs	CD8+T cells	CD8+T cells	T Cells			IL-12	D00602	F	Rhesus		eventCount	37128
R2W3_D00602_Rh_F_IL-12.fcs	CD8+T cells	CD8+T cells	T Cells			IL-12	D00602	F	Rhesus	T Cells	percent	39.209225700164744
R2W3_D00602_Rh_F_IL-12.fcs	CD4+T cells	CD4+T cells	T Cells			IL-12	D00602	F	Rhesus		eventCount	35060
R2W3_D00602_Rh_F_IL-12.fcs	CD4+T cells	CD4+T cells	T Cells			IL-12	D00602	F	Rhesus	T Cells	percent	37.02530308790605
R2W3_D00602_Rh_F_IL-12.fcs	CD4+/CD8+	CD4+/CD8+	T Cells			IL-12	D00602	F	Rhesus		eventCount	15242
R2W3_D00602_Rh_F_IL-12.fcs	CD4+/CD8+	CD4+/CD8+	T Cells			IL-12	D00602	F	Rhesus	T Cells	percent	16.096396738900857
R2W3_D00602_Rh_F_IL-6.fcs	Basophils	Basophils	Singlets			IL-6	D00602	F	Rhesus		eventCount	311
R2W3_D00602_Rh_F_IL-6.fcs	Basophils	Basophils	Singlets			IL-6	D00602	F	Rhesus	Singlets	percent	0.1992478553627144
R2W3_D00602_Rh_F_IL-6.fcs	B Cells	B Cells	CD45+ CD66-			IL-6	D00602	F	Rhesus		eventCount	5302
R2W3_D00602_Rh_F_IL-6.fcs	B Cells	B Cells	CD45+ CD66-			IL-6	D00602	F	Rhesus	CD45+ CD66-	percent	5.941415092225285
R2W3_D00602_Rh_F_IL-6.fcs	CD1c+ B cells	CD1c+ B cells	B Cells			IL-6	D00602	F	Rhesus		eventCount	424
R2W3_D00602_Rh_F_IL-6.fcs	CD1c+ B cells	CD1c+ B cells	B Cells			IL-6	D00602	F	Rhesus	B Cells	percent	7.996982270841192
R2W3_D00602_Rh_F_IL-6.fcs	CD7+/HLA-DR-	CD7+/HLA-DR-	CD19- CD3-			IL-6	D00602	F	Rhesus		eventCount	9110
R2W3_D00602_Rh_F_IL-6.fcs	CD7+/HLA-DR-	CD7+/HLA-DR-	CD19- CD3-			IL-6	D00602	F	Rhesus	CD19- CD3-	percent	66.13430127041742
R2W3_D00602_Rh_F_IL-6.fcs	pDCs	pDCs	HLA-DR+ CD11c-			IL-6	D00602	F	Rhesus		eventCount	51
R2W3_D00602_Rh_F_IL-6.fcs	pDCs	pDCs	HLA-DR+ CD11c-			IL-6	D00602	F	Rhesus	HLA-DR+ CD11c-	percent	4.377682403433476
R2W3_D00602_Rh_F_IL-6.fcs	CD11b-/CD16-	CD11b-/CD16-	HLA-DR+/CD7-			IL-6	D00602	F	Rhesus		eventCount	644
R2W3_D00602_Rh_F_IL-6.fcs	CD11b-/CD16-	CD11b-/CD16-	HLA-DR+/CD7-			IL-6	D00602	F	Rhesus	HLA-DR+/CD7-	percent	18.639652677279305
R2W3_D00602_Rh_F_IL-6.fcs	CD11b+/CD16-	CD11b+/CD16-	HLA-DR+/CD7-			IL-6	D00602	F	Rhesus		eventCount	1049
R2W3_D00602_Rh_F_IL-6.fcs	CD11b+/CD16-	CD11b+/CD16-	HLA-DR+/CD7-			IL-6	D00602	F	Rhesus	HLA-DR+/CD7-	percent	30.36179450072359
R2W3_D00602_Rh_F_IL-6.fcs	CD16+/CD11b-	CD16+/CD11b-	HLA-DR+/CD7-			IL-6	D00602	F	Rhesus		eventCount	1517
R2W3_D00602_Rh_F_IL-6.fcs	CD16+/CD11b-	CD16+/CD11b-	HLA-DR+/CD7-			IL-6	D00602	F	Rhesus	HLA-DR+/CD7-	percent	43.90738060781476
R2W3_D00602_Rh_F_IL-6.fcs	CD16+/CD11b+	CD16+/CD11b+	HLA-DR+/CD7-			IL-6	D00602	F	Rhesus		eventCount	218
R2W3_D00602_Rh_F_IL-6.fcs	CD16+/CD11b+	CD16+/CD11b+	HLA-DR+/CD7-			IL-6	D00602	F	Rhesus	HLA-DR+/CD7-	percent	6.309696092619392
R2W3_D00602_Rh_F_IL-6.fcs	Neutrophils	Neutrophils	Non-Basophils			IL-6	D00602	F	Rhesus		eventCount	43956
R2W3_D00602_Rh_F_IL-6.fcs	Neutrophils	Neutrophils	Non-Basophils			IL-6	D00602	F	Rhesus	Non-Basophils	percent	28.226319135410044
R2W3_D00602_Rh_F_IL-6.fcs	CD8+T cells	CD8+T cells	T Cells			IL-6	D00602	F	Rhesus		eventCount	27810
R2W3_D00602_Rh_F_IL-6.fcs	CD8+T cells	CD8+T cells	T Cells			IL-6	D00602	F	Rhesus	T Cells	percent	40.36753178888695
R2W3_D00602_Rh_F_IL-6.fcs	CD4+T cells	CD4+T cells	T Cells			IL-6	D00602	F	Rhesus		eventCount	24668
R2W3_D00602_Rh_F_IL-6.fcs	CD4+T cells	CD4+T cells	T Cells			IL-6	D00602	F	Rhesus	T Cells	percent	35.80677001683795
R2W3_D00602_Rh_F_IL-6.fcs	CD4+/CD8+	CD4+/CD8+	T Cells			IL-6	D00602	F	Rhesus		eventCount	11312
R2W3_D00602_Rh_F_IL-6.fcs	CD4+/CD8+	CD4+/CD8+	T Cells			IL-6	D00602	F	Rhesus	T Cells	percent	16.419903617255994
R2W3_D00602_Rh_F_IL-4.fcs	Basophils	Basophils	Singlets			IL-4	D00602	F	Rhesus		eventCount	320
R2W3_D00602_Rh_F_IL-4.fcs	Basophils	Basophils	Singlets			IL-4	D00602	F	Rhesus	Singlets	percent	0.19336749492410327
R2W3_D00602_Rh_F_IL-4.fcs	B Cells	B Cells	CD45+ CD66-			IL-4	D00602	F	Rhesus		eventCount	7017
R2W3_D00602_Rh_F_IL-4.fcs	B Cells	B Cells	CD45+ CD66-			IL-4	D00602	F	Rhesus	CD45+ CD66-	percent	6.401963378251389
R2W3_D00602_Rh_F_IL-4.fcs	CD1c+ B cells	CD1c+ B cells	B Cells			IL-4	D00602	F	Rhesus		eventCount	1635
R2W3_D00602_Rh_F_IL-4.fcs	CD1c+ B cells	CD1c+ B cells	B Cells			IL-4	D00602	F	Rhesus	B Cells	percent	23.300555793073965
R2W3_D00602_Rh_F_IL-4.fcs	CD7+/HLA-DR-	CD7+/HLA-DR-	CD19- CD3-			IL-4	D00602	F	Rhesus		eventCount	11052
R2W3_D00602_Rh_F_IL-4.fcs	CD7+/HLA-DR-	CD7+/HLA-DR-	CD19- CD3-			IL-4	D00602	F	Rhesus	CD19- CD3-	percent	65.26129317980514
R2W3_D00602_Rh_F_IL-4.fcs	pDCs	pDCs	HLA-DR+ CD11c-			IL-4	D00602	F	Rhesus		eventCount	55
R2W3_D00602_Rh_F_IL-4.fcs	pDCs	pDCs	HLA-DR+ CD11c-			IL-4	D00602	F	Rhesus	HLA-DR+ CD11c-	percent	3.5644847699287103
R2W3_D00602_Rh_F_IL-4.fcs	CD11b-/CD16-	CD11b-/CD16-	HLA-DR+/CD7-			IL-4	D00602	F	Rhesus		eventCount	631
R2W3_D00602_Rh_F_IL-4.fcs	CD11b-/CD16-	CD11b-/CD16-	HLA-DR+/CD7-			IL-4	D00602	F	Rhesus	HLA-DR+/CD7-	percent	14.847058823529412
R2W3_D00602_Rh_F_IL-4.fcs	CD11b+/CD16-	CD11b+/CD16-	HLA-DR+/CD7-			IL-4	D00602	F	Rhesus		eventCount	1530
R2W3_D00602_Rh_F_IL-4.fcs	CD11b+/CD16-	CD11b+/CD16-	HLA-DR+/CD7-			IL-4	D00602	F	Rhesus	HLA-DR+/CD7-	percent	36
R2W3_D00602_Rh_F_IL-4.fcs	CD16+/CD11b-	CD16+/CD11b-	HLA-DR+/CD7-			IL-4	D00602	F	Rhesus		eventCount	1760
R2W3_D00602_Rh_F_IL-4.fcs	CD16+/CD11b-	CD16+/CD11b-	HLA-DR+/CD7-			IL-4	D00602	F	Rhesus	HLA-DR+/CD7-	percent	41.411764705882355
R2W3_D00602_Rh_F_IL-4.fcs	CD16+/CD11b+	CD16+/CD11b+	HLA-DR+/CD7-			IL-4	D00602	F	Rhesus		eventCount	293
R2W3_D00602_Rh_F_IL-4.fcs	CD16+/CD11b+	CD16+/CD11b+	HLA-DR+/CD7-			IL-4	D00602	F	Rhesus	HLA-DR+/CD7-	percent	6.894117647058824
R2W3_D00602_Rh_F_IL-4.fcs	Neutrophils	Neutrophils	Non-Basophils			IL-4	D00602	F	Rhesus		eventCount	43828
R2W3_D00602_Rh_F_IL-4.fcs	Neutrophils	Neutrophils	Non-Basophils			IL-4	D00602	F	Rhesus	Non-Basophils	percent	26.54231642694928
R2W3_D00602_Rh_F_IL-4.fcs	CD8+T cells	CD8+T cells	T Cells			IL-4	D00602	F	Rhesus		eventCount	33795
R2W3_D00602_Rh_F_IL-4.fcs	CD8+T cells	CD8+T cells	T Cells			IL-4	D00602	F	Rhesus	T Cells	percent	40.1275246678303
R2W3_D00602_Rh_F_IL-4.fcs	CD4+T cells	CD4+T cells	T Cells			IL-4	D00602	F	Rhesus		eventCount	31455
R2W3_D00602_Rh_F_IL-4.fcs	CD4+T cells	CD4+T cells	T Cells			IL-4	D00602	F	Rhesus	T Cells	percent	37.34905425141595
R2W3_D00602_Rh_F_IL-4.fcs	CD4+/CD8+	CD4+/CD8+	T Cells			IL-4	D00602	F	Rhesus		eventCount	12491
R2W3_D00602_Rh_F_IL-4.fcs	CD4+/CD8+	CD4+/CD8+	T Cells			IL-4	D00602	F	Rhesus	T Cells	percent	14.831570073261378
R2W3_D00602_Rh_F_IL-2.fcs	Basophils	Basophils	Singlets			IL-2	D00602	F	Rhesus		eventCount	360
R2W3_D00602_Rh_F_IL-2.fcs	Basophils	Basophils	Singlets			IL-2	D00602	F	Rhesus	Singlets	percent	0.1911264248209517
R2W3_D00602_Rh_F_IL-2.fcs	B Cells	B Cells	CD45+ CD66-			IL-2	D00602	F	Rhesus		eventCount	7149
R2W3_D00602_Rh_F_IL-2.fcs	B Cells	B Cells	CD45+ CD66-			IL-2	D00602	F	Rhesus	CD45+ CD66-	percent	6.275236122327166
R2W3_D00602_Rh_F_IL-2.fcs	CD1c+ B cells	CD1c+ B cells	B Cells			IL-2	D00602	F	Rhesus		eventCount	1673
R2W3_D00602_Rh_F_IL-2.fcs	CD1c+ B cells	CD1c+ B cells	B Cells			IL-2	D00602	F	Rhesus	B Cells	percent	23.401874388026297
R2W3_D00602_Rh_F_IL-2.fcs	CD7+/HLA-DR-	CD7+/HLA-DR-	CD19- CD3-			IL-2	D00602	F	Rhesus		eventCount	11269
R2W3_D00602_Rh_F_IL-2.fcs	CD7+/HLA-DR-	CD7+/HLA-DR-	CD19- CD3-			IL-2	D00602	F	Rhesus	CD19- CD3-	percent	65.22544423221625
R2W3_D00602_Rh_F_IL-2.fcs	pDCs	pDCs	HLA-DR+ CD11c-			IL-2	D00602	F	Rhesus		eventCount	57
R2W3_D00602_Rh_F_IL-2.fcs	pDCs	pDCs	HLA-DR+ CD11c-			IL-2	D00602	F	Rhesus	HLA-DR+ CD11c-	percent	3.7898936170212765
R2W3_D00602_Rh_F_IL-2.fcs	CD11b-/CD16-	CD11b-/CD16-	HLA-DR+/CD7-			IL-2	D00602	F	Rhesus		eventCount	724
R2W3_D00602_Rh_F_IL-2.fcs	CD11b-/CD16-	CD11b-/CD16-	HLA-DR+/CD7-			IL-2	D00602	F	Rhesus	HLA-DR+/CD7-	percent	17.01927597555242
R2W3_D00602_Rh_F_IL-2.fcs	CD11b+/CD16-	CD11b+/CD16-	HLA-DR+/CD7-			IL-2	D00602	F	Rhesus		eventCount	1449
R2W3_D00602_Rh_F_IL-2.fcs	CD11b+/CD16-	CD11b+/CD16-	HLA-DR+/CD7-			IL-2	D00602	F	Rhesus	HLA-DR+/CD7-	percent	34.062059238363894
R2W3_D00602_Rh_F_IL-2.fcs	CD16+/CD11b-	CD16+/CD11b-	HLA-DR+/CD7-			IL-2	D00602	F	Rhesus		eventCount	1762
R2W3_D00602_Rh_F_IL-2.fcs	CD16+/CD11b-	CD16+/CD11b-	HLA-DR+/CD7-			IL-2	D00602	F	Rhesus	HLA-DR+/CD7-	percent	41.41984015044664
R2W3_D00602_Rh_F_IL-2.fcs	CD16+/CD11b+	CD16+/CD11b+	HLA-DR+/CD7-			IL-2	D00602	F	Rhesus		eventCount	292
R2W3_D00602_Rh_F_IL-2.fcs	CD16+/CD11b+	CD16+/CD11b+	HLA-DR+/CD7-			IL-2	D00602	F	Rhesus	HLA-DR+/CD7-	percent	6.864127879642689
R2W3_D00602_Rh_F_IL-2.fcs	Neutrophils	Neutrophils	Non-Basophils			IL-2	D00602	F	Rhesus		eventCount	50610
R2W3_D00602_Rh_F_IL-2.fcs	Neutrophils	Neutrophils	Non-Basophils			IL-2	D00602	F	Rhesus	Non-Basophils	percent	26.928663782782895
R2W3_D00602_Rh_F_IL-2.fcs	CD8+T cells	CD8+T cells	T Cells			IL-2	D00602	F	Rhesus		eventCount	35254
R2W3_D00602_Rh_F_IL-2.fcs	CD8+T cells	CD8+T cells	T Cells			IL-2	D00602	F	Rhesus	T Cells	percent	40.14850413966678
R2W3_D00602_Rh_F_IL-2.fcs	CD4+T cells	CD4+T cells	T Cells			IL-2	D00602	F	Rhesus		eventCount	32318
R2W3_D00602_Rh_F_IL-2.fcs	CD4+T cells	CD4+T cells	T Cells			IL-2	D00602	F	Rhesus	T Cells	percent	36.80488332631052
R2W3_D00602_Rh_F_IL-2.fcs	CD4+/CD8+	CD4+/CD8+	T Cells			IL-2	D00602	F	Rhesus		eventCount	13434
R2W3_D00602_Rh_F_IL-2.fcs	CD4+/CD8+	CD4+/CD8+	T Cells			IL-2	D00602	F	Rhesus	T Cells	percent	15.299115124873305
R2W3_D00602_Rh_F_IFNg.fcs	Basophils	Basophils	Singlets			IFNg	D00602	F	Rhesus		eventCount	463
R2W3_D00602_Rh_F_IFNg.fcs	Basophils	Basophils	Singlets			IFNg	D00602	F	Rhesus	Singlets	percent	0.21196722061987822
R2W3_D00602_Rh_F_IFNg.fcs	B Cells	B Cells	CD45+ CD66-			IFNg	D00602	F	Rhesus		eventCount	8059
R2W3_D00602_Rh_F_IFNg.fcs	B Cells	B Cells	CD45+ CD66-			IFNg	D00602	F	Rhesus	CD45+ CD66-	percent	6.161644736339101
R2W3_D00602_Rh_F_IFNg.fcs	CD1c+ B cells	CD1c+ B cells	B Cells			IFNg	D00602	F	Rhesus		eventCount	1092
R2W3_D00602_Rh_F_IFNg.fcs	CD1c+ B cells	CD1c+ B cells	B Cells			IFNg	D00602	F	Rhesus	B Cells	percent	13.550068246680729
R2W3_D00602_Rh_F_IFNg.fcs	CD7+/HLA-DR-	CD7+/HLA-DR-	CD19- CD3-			IFNg	D00602	F	Rhesus		eventCount	13097
R2W3_D00602_Rh_F_IFNg.fcs	CD7+/HLA-DR-	CD7+/HLA-DR-	CD19- CD3-			IFNg	D00602	F	Rhesus	CD19- CD3-	percent	66.68194083804286
R2W3_D00602_Rh_F_IFNg.fcs	pDCs	pDCs	HLA-DR+ CD11c-			IFNg	D00602	F	Rhesus		eventCount	64
R2W3_D00602_Rh_F_IFNg.fcs	pDCs	pDCs	HLA-DR+ CD11c-			IFNg	D00602	F	Rhesus	HLA-DR+ CD11c-	percent	4.012539184952978
R2W3_D00602_Rh_F_IFNg.fcs	CD11b-/CD16-	CD11b-/CD16-	HLA-DR+/CD7-			IFNg	D00602	F	Rhesus		eventCount	906
R2W3_D00602_Rh_F_IFNg.fcs	CD11b-/CD16-	CD11b-/CD16-	HLA-DR+/CD7-			IFNg	D00602	F	Rhesus	HLA-DR+/CD7-	percent	18.68426479686533
R2W3_D00602_Rh_F_IFNg.fcs	CD11b+/CD16-	CD11b+/CD16-	HLA-DR+/CD7-			IFNg	D00602	F	Rhesus		eventCount	1456
R2W3_D00602_Rh_F_IFNg.fcs	CD11b+/CD16-	CD11b+/CD16-	HLA-DR+/CD7-			IFNg	D00602	F	Rhesus	HLA-DR+/CD7-	percent	30.02680965147453
R2W3_D00602_Rh_F_IFNg.fcs	CD16+/CD11b-	CD16+/CD11b-	HLA-DR+/CD7-			IFNg	D00602	F	Rhesus		eventCount	2168
R2W3_D00602_Rh_F_IFNg.fcs	CD16+/CD11b-	CD16+/CD11b-	HLA-DR+/CD7-			IFNg	D00602	F	Rhesus	HLA-DR+/CD7-	percent	44.710249535986804
R2W3_D00602_Rh_F_IFNg.fcs	CD16+/CD11b+	CD16+/CD11b+	HLA-DR+/CD7-			IFNg	D00602	F	Rhesus		eventCount	288
R2W3_D00602_Rh_F_IFNg.fcs	CD16+/CD11b+	CD16+/CD11b+	HLA-DR+/CD7-			IFNg	D00602	F	Rhesus	HLA-DR+/CD7-	percent	5.939368942049907
R2W3_D00602_Rh_F_IFNg.fcs	Neutrophils	Neutrophils	Non-Basophils			IFNg	D00602	F	Rhesus		eventCount	59021
R2W3_D00602_Rh_F_IFNg.fcs	Neutrophils	Neutrophils	Non-Basophils			IFNg	D00602	F	Rhesus	Non-Basophils	percent	27.086651032368504
R2W3_D00602_Rh_F_IFNg.fcs	CD8+T cells	CD8+T cells	T Cells			IFNg	D00602	F	Rhesus		eventCount	40826
R2W3_D00602_Rh_F_IFNg.fcs	CD8+T cells	CD8+T cells	T Cells			IFNg	D00602	F	Rhesus	T Cells	percent	40.26470994338916
R2W3_D00602_Rh_F_IFNg.fcs	CD4+T cells	CD4+T cells	T Cells			IFNg	D00602	F	Rhesus		eventCount	37425
R2W3_D00602_Rh_F_IFNg.fcs	CD4+T cells	CD4+T cells	T Cells			IFNg	D00602	F	Rhesus	T Cells	percent	36.910468075034025
R2W3_D00602_Rh_F_IFNg.fcs	CD4+/CD8+	CD4+/CD8+	T Cells			IFNg	D00602	F	Rhesus		eventCount	15545
R2W3_D00602_Rh_F_IFNg.fcs	CD4+/CD8+	CD4+/CD8+	T Cells			IFNg	D00602	F	Rhesus	T Cells	percent	15.331281929897232
R2W3_D00602_Rh_F_IFNb.fcs	Basophils	Basophils	Singlets			IFNb	D00602	F	Rhesus		eventCount	255
R2W3_D00602_Rh_F_IFNb.fcs	Basophils	Basophils	Singlets			IFNb	D00602	F	Rhesus	Singlets	percent	0.1851959445719432
R2W3_D00602_Rh_F_IFNb.fcs	B Cells	B Cells	CD45+ CD66-			IFNb	D00602	F	Rhesus		eventCount	5681
R2W3_D00602_Rh_F_IFNb.fcs	B Cells	B Cells	CD45+ CD66-			IFNb	D00602	F	Rhesus	CD45+ CD66-	percent	6.340614083060816
R2W3_D00602_Rh_F_IFNb.fcs	CD1c+ B cells	CD1c+ B cells	B Cells			IFNb	D00602	F	Rhesus		eventCount	1449
R2W3_D00602_Rh_F_IFNb.fcs	CD1c+ B cells	CD1c+ B cells	B Cells			IFNb	D00602	F	Rhesus	B Cells	percent	25.506072874493928
R2W3_D00602_Rh_F_IFNb.fcs	CD7+/HLA-DR-	CD7+/HLA-DR-	CD19- CD3-			IFNb	D00602	F	Rhesus		eventCount	8754
R2W3_D00602_Rh_F_IFNb.fcs	CD7+/HLA-DR-	CD7+/HLA-DR-	CD19- CD3-			IFNb	D00602	F	Rhesus	CD19- CD3-	percent	65.44557416267942
R2W3_D00602_Rh_F_IFNb.fcs	pDCs	pDCs	HLA-DR+ CD11c-			IFNb	D00602	F	Rhesus		eventCount	35
R2W3_D00602_Rh_F_IFNb.fcs	pDCs	pDCs	HLA-DR+ CD11c-			IFNb	D00602	F	Rhesus	HLA-DR+ CD11c-	percent	3.2080659945004584
R2W3_D00602_Rh_F_IFNb.fcs	CD11b-/CD16-	CD11b-/CD16-	HLA-DR+/CD7-			IFNb	D00602	F	Rhesus		eventCount	546
R2W3_D00602_Rh_F_IFNb.fcs	CD11b-/CD16-	CD11b-/CD16-	HLA-DR+/CD7-			IFNb	D00602	F	Rhesus	HLA-DR+/CD7-	percent	15.974253949678175
R2W3_D00602_Rh_F_IFNb.fcs	CD11b+/CD16-	CD11b+/CD16-	HLA-DR+/CD7-			IFNb	D00602	F	Rhesus		eventCount	1120
R2W3_D00602_Rh_F_IFNb.fcs	CD11b+/CD16-	CD11b+/CD16-	HLA-DR+/CD7-			IFNb	D00602	F	Rhesus	HLA-DR+/CD7-	percent	32.76770040959625
R2W3_D00602_Rh_F_IFNb.fcs	CD16+/CD11b-	CD16+/CD11b-	HLA-DR+/CD7-			IFNb	D00602	F	Rhesus		eventCount	1460
R2W3_D00602_Rh_F_IFNb.fcs	CD16+/CD11b-	CD16+/CD11b-	HLA-DR+/CD7-			IFNb	D00602	F	Rhesus	HLA-DR+/CD7-	percent	42.71503803393797
R2W3_D00602_Rh_F_IFNb.fcs	CD16+/CD11b+	CD16+/CD11b+	HLA-DR+/CD7-			IFNb	D00602	F	Rhesus		eventCount	253
R2W3_D00602_Rh_F_IFNb.fcs	CD16+/CD11b+	CD16+/CD11b+	HLA-DR+/CD7-			IFNb	D00602	F	Rhesus	HLA-DR+/CD7-	percent	7.401989467524868
R2W3_D00602_Rh_F_IFNb.fcs	Neutrophils	Neutrophils	Non-Basophils			IFNb	D00602	F	Rhesus		eventCount	36720
R2W3_D00602_Rh_F_IFNb.fcs	Neutrophils	Neutrophils	Non-Basophils			IFNb	D00602	F	Rhesus	Non-Basophils	percent	26.725668869544965
R2W3_D00602_Rh_F_IFNb.fcs	CD8+T cells	CD8+T cells	T Cells			IFNb	D00602	F	Rhesus		eventCount	28264
R2W3_D00602_Rh_F_IFNb.fcs	CD8+T cells	CD8+T cells	T Cells			IFNb	D00602	F	Rhesus	T Cells	percent	40.77146113122629
R2W3_D00602_Rh_F_IFNb.fcs	CD4+T cells	CD4+T cells	T Cells			IFNb	D00602	F	Rhesus		eventCount	25227
R2W3_D00602_Rh_F_IFNb.fcs	CD4+T cells	CD4+T cells	T Cells			IFNb	D00602	F	Rhesus	T Cells	percent	36.390519740922926
R2W3_D00602_Rh_F_IFNb.fcs	CD4+/CD8+	CD4+/CD8+	T Cells			IFNb	D00602	F	Rhesus		eventCount	10420
R2W3_D00602_Rh_F_IFNb.fcs	CD4+/CD8+	CD4+/CD8+	T Cells			IFNb	D00602	F	Rhesus	T Cells	percent	15.03108636383307
R2W3_D00602_Rh_F_IFNa2.fcs	Basophils	Basophils	Singlets			IFNa2	D00602	F	Rhesus		eventCount	275
R2W3_D00602_Rh_F_IFNa2.fcs	Basophils	Basophils	Singlets			IFNa2	D00602	F	Rhesus	Singlets	percent	0.20150948926503995
R2W3_D00602_Rh_F_IFNa2.fcs	B Cells	B Cells	CD45+ CD66-			IFNa2	D00602	F	Rhesus		eventCount	5122
R2W3_D00602_Rh_F_IFNa2.fcs	B Cells	B Cells	CD45+ CD66-			IFNa2	D00602	F	Rhesus	CD45+ CD66-	percent	6.151222558485853
R2W3_D00602_Rh_F_IFNa2.fcs	CD1c+ B cells	CD1c+ B cells	B Cells			IFNa2	D00602	F	Rhesus		eventCount	775
R2W3_D00602_Rh_F_IFNa2.fcs	CD1c+ B cells	CD1c+ B cells	B Cells			IFNa2	D00602	F	Rhesus	B Cells	percent	15.1308082780164
R2W3_D00602_Rh_F_IFNa2.fcs	CD7+/HLA-DR-	CD7+/HLA-DR-	CD19- CD3-			IFNa2	D00602	F	Rhesus		eventCount	8636
R2W3_D00602_Rh_F_IFNa2.fcs	CD7+/HLA-DR-	CD7+/HLA-DR-	CD19- CD3-			IFNa2	D00602	F	Rhesus	CD19- CD3-	percent	67.73864616832692
R2W3_D00602_Rh_F_IFNa2.fcs	pDCs	pDCs	HLA-DR+ CD11c-			IFNa2	D00602	F	Rhesus		eventCount	28
R2W3_D00602_Rh_F_IFNa2.fcs	pDCs	pDCs	HLA-DR+ CD11c-			IFNa2	D00602	F	Rhesus	HLA-DR+ CD11c-	percent	2.9166666666666665
R2W3_D00602_Rh_F_IFNa2.fcs	CD11b-/CD16-	CD11b-/CD16-	HLA-DR+/CD7-			IFNa2	D00602	F	Rhesus		eventCount	539
R2W3_D00602_Rh_F_IFNa2.fcs	CD11b-/CD16-	CD11b-/CD16-	HLA-DR+/CD7-			IFNa2	D00602	F	Rhesus	HLA-DR+/CD7-	percent	17.53986332574032
R2W3_D00602_Rh_F_IFNa2.fcs	CD11b+/CD16-	CD11b+/CD16-	HLA-DR+/CD7-			IFNa2	D00602	F	Rhesus		eventCount	928
R2W3_D00602_Rh_F_IFNa2.fcs	CD11b+/CD16-	CD11b+/CD16-	HLA-DR+/CD7-			IFNa2	D00602	F	Rhesus	HLA-DR+/CD7-	percent	30.198503091441587
R2W3_D00602_Rh_F_IFNa2.fcs	CD16+/CD11b-	CD16+/CD11b-	HLA-DR+/CD7-			IFNa2	D00602	F	Rhesus		eventCount	1371
R2W3_D00602_Rh_F_IFNa2.fcs	CD16+/CD11b-	CD16+/CD11b-	HLA-DR+/CD7-			IFNa2	D00602	F	Rhesus	HLA-DR+/CD7-	percent	44.614383338756916
R2W3_D00602_Rh_F_IFNa2.fcs	CD16+/CD11b+	CD16+/CD11b+	HLA-DR+/CD7-			IFNa2	D00602	F	Rhesus		eventCount	207
R2W3_D00602_Rh_F_IFNa2.fcs	CD16+/CD11b+	CD16+/CD11b+	HLA-DR+/CD7-			IFNa2	D00602	F	Rhesus	HLA-DR+/CD7-	percent	6.736088512853889
R2W3_D00602_Rh_F_IFNa2.fcs	Neutrophils	Neutrophils	Non-Basophils			IFNa2	D00602	F	Rhesus		eventCount	38107
R2W3_D00602_Rh_F_IFNa2.fcs	Neutrophils	Neutrophils	Non-Basophils			IFNa2	D00602	F	Rhesus	Non-Basophils	percent	27.988366029393404
R2W3_D00602_Rh_F_IFNa2.fcs	CD8+T cells	CD8+T cells	T Cells			IFNa2	D00602	F	Rhesus		eventCount	25985
R2W3_D00602_Rh_F_IFNa2.fcs	CD8+T cells	CD8+T cells	T Cells			IFNa2	D00602	F	Rhesus	T Cells	percent	40.404590123149646
R2W3_D00602_Rh_F_IFNa2.fcs	CD4+T cells	CD4+T cells	T Cells			IFNa2	D00602	F	Rhesus		eventCount	23670
R2W3_D00602_Rh_F_IFNa2.fcs	CD4+T cells	CD4+T cells	T Cells			IFNa2	D00602	F	Rhesus	T Cells	percent	36.80495086453539
R2W3_D00602_Rh_F_IFNa2.fcs	CD4+/CD8+	CD4+/CD8+	T Cells			IFNa2	D00602	F	Rhesus		eventCount	9811
R2W3_D00602_Rh_F_IFNa2.fcs	CD4+/CD8+	CD4+/CD8+	T Cells			IFNa2	D00602	F	Rhesus	T Cells	percent	15.2553178256002
R2W3_D00602_Rh_F_GM-CSF.fcs	Basophils	Basophils	Singlets			GM-CSF	D00602	F	Rhesus		eventCount	280
R2W3_D00602_Rh_F_GM-CSF.fcs	Basophils	Basophils	Singlets			GM-CSF	D00602	F	Rhesus	Singlets	percent	0.2033450256723095
R2W3_D00602_Rh_F_GM-CSF.fcs	B Cells	B Cells	CD45+ CD66-			GM-CSF	D00602	F	Rhesus		eventCount	5074
R2W3_D00602_Rh_F_GM-CSF.fcs	B Cells	B Cells	CD45+ CD66-			GM-CSF	D00602	F	Rhesus	CD45+ CD66-	percent	6.067200765275619
R2W3_D00602_Rh_F_GM-CSF.fcs	CD1c+ B cells	CD1c+ B cells	B Cells			GM-CSF	D00602	F	Rhesus		eventCount	844
R2W3_D00602_Rh_F_GM-CSF.fcs	CD1c+ B cells	CD1c+ B cells	B Cells			GM-CSF	D00602	F	Rhesus	B Cells	percent	16.633819471817105
R2W3_D00602_Rh_F_GM-CSF.fcs	CD7+/HLA-DR-	CD7+/HLA-DR-	CD19- CD3-			GM-CSF	D00602	F	Rhesus		eventCount	8524
R2W3_D00602_Rh_F_GM-CSF.fcs	CD7+/HLA-DR-	CD7+/HLA-DR-	CD19- CD3-			GM-CSF	D00602	F	Rhesus	CD19- CD3-	percent	67.56499682942295
R2W3_D00602_Rh_F_GM-CSF.fcs	pDCs	pDCs	HLA-DR+ CD11c-			GM-CSF	D00602	F	Rhesus		eventCount	49
R2W3_D00602_Rh_F_GM-CSF.fcs	pDCs	pDCs	HLA-DR+ CD11c-			GM-CSF	D00602	F	Rhesus	HLA-DR+ CD11c-	percent	4.794520547945205
R2W3_D00602_Rh_F_GM-CSF.fcs	CD11b-/CD16-	CD11b-/CD16-	HLA-DR+/CD7-			GM-CSF	D00602	F	Rhesus		eventCount	580
R2W3_D00602_Rh_F_GM-CSF.fcs	CD11b-/CD16-	CD11b-/CD16-	HLA-DR+/CD7-			GM-CSF	D00602	F	Rhesus	HLA-DR+/CD7-	percent	19.091507570770244
R2W3_D00602_Rh_F_GM-CSF.fcs	CD11b+/CD16-	CD11b+/CD16-	HLA-DR+/CD7-			GM-CSF	D00602	F	Rhesus		eventCount	970
R2W3_D00602_Rh_F_GM-CSF.fcs	CD11b+/CD16-	CD11b+/CD16-	HLA-DR+/CD7-			GM-CSF	D00602	F	Rhesus	HLA-DR+/CD7-	percent	31.92890059249506
R2W3_D00602_Rh_F_GM-CSF.fcs	CD16+/CD11b-	CD16+/CD11b-	HLA-DR+/CD7-			GM-CSF	D00602	F	Rhesus		eventCount	1237
R2W3_D00602_Rh_F_GM-CSF.fcs	CD16+/CD11b-	CD16+/CD11b-	HLA-DR+/CD7-			GM-CSF	D00602	F	Rhesus	HLA-DR+/CD7-	percent	40.71757735352205
R2W3_D00602_Rh_F_GM-CSF.fcs	CD16+/CD11b+	CD16+/CD11b+	HLA-DR+/CD7-			GM-CSF	D00602	F	Rhesus		eventCount	217
R2W3_D00602_Rh_F_GM-CSF.fcs	CD16+/CD11b+	CD16+/CD11b+	HLA-DR+/CD7-			GM-CSF	D00602	F	Rhesus	HLA-DR+/CD7-	percent	7.142857142857143
R2W3_D00602_Rh_F_GM-CSF.fcs	Neutrophils	Neutrophils	Non-Basophils			GM-CSF	D00602	F	Rhesus		eventCount	37001
R2W3_D00602_Rh_F_GM-CSF.fcs	Neutrophils	Neutrophils	Non-Basophils			GM-CSF	D00602	F	Rhesus	Non-Basophils	percent	26.935284268763194
R2W3_D00602_Rh_F_GM-CSF.fcs	CD8+T cells	CD8+T cells	T Cells			GM-CSF	D00602	F	Rhesus		eventCount	26313
R2W3_D00602_Rh_F_GM-CSF.fcs	CD8+T cells	CD8+T cells	T Cells			GM-CSF	D00602	F	Rhesus	T Cells	percent	40.62278074536079
R2W3_D00602_Rh_F_GM-CSF.fcs	CD4+T cells	CD4+T cells	T Cells			GM-CSF	D00602	F	Rhesus		eventCount	23542
R2W3_D00602_Rh_F_GM-CSF.fcs	CD4+T cells	CD4+T cells	T Cells			GM-CSF	D00602	F	Rhesus	T Cells	percent	36.34482971562664
R2W3_D00602_Rh_F_GM-CSF.fcs	CD4+/CD8+	CD4+/CD8+	T Cells			GM-CSF	D00602	F	Rhesus		eventCount	9938
R2W3_D00602_Rh_F_GM-CSF.fcs	CD4+/CD8+	CD4+/CD8+	T Cells			GM-CSF	D00602	F	Rhesus	T Cells	percent	15.342575724827864
R2W3_D00602_Rh_F_Ebola VLPs.fcs	Basophils	Basophils	Singlets			Ebola VLPs	D00602	F	Rhesus		eventCount	338
R2W3_D00602_Rh_F_Ebola VLPs.fcs	Basophils	Basophils	Singlets			Ebola VLPs	D00602	F	Rhesus	Singlets	percent	0.2149388886769176
R2W3_D00602_Rh_F_Ebola VLPs.fcs	B Cells	B Cells	CD45+ CD66-			Ebola VLPs	D00602	F	Rhesus		eventCount	5281
R2W3_D00602_Rh_F_Ebola VLPs.fcs	B Cells	B Cells	CD45+ CD66-			Ebola VLPs	D00602	F	Rhesus	CD45+ CD66-	percent	5.788919825488348
R2W3_D00602_Rh_F_Ebola VLPs.fcs	CD1c+ B cells	CD1c+ B cells	B Cells			Ebola VLPs	D00602	F	Rhesus		eventCount	376
R2W3_D00602_Rh_F_Ebola VLPs.fcs	CD1c+ B cells	CD1c+ B cells	B Cells			Ebola VLPs	D00602	F	Rhesus	B Cells	percent	7.1198636621851925
R2W3_D00602_Rh_F_Ebola VLPs.fcs	CD7+/HLA-DR-	CD7+/HLA-DR-	CD19- CD3-			Ebola VLPs	D00602	F	Rhesus		eventCount	9371
R2W3_D00602_Rh_F_Ebola VLPs.fcs	CD7+/HLA-DR-	CD7+/HLA-DR-	CD19- CD3-			Ebola VLPs	D00602	F	Rhesus	CD19- CD3-	percent	67.09386410825518
R2W3_D00602_Rh_F_Ebola VLPs.fcs	pDCs	pDCs	HLA-DR+ CD11c-			Ebola VLPs	D00602	F	Rhesus		eventCount	54
R2W3_D00602_Rh_F_Ebola VLPs.fcs	pDCs	pDCs	HLA-DR+ CD11c-			Ebola VLPs	D00602	F	Rhesus	HLA-DR+ CD11c-	percent	4.5
R2W3_D00602_Rh_F_Ebola VLPs.fcs	CD11b-/CD16-	CD11b-/CD16-	HLA-DR+/CD7-			Ebola VLPs	D00602	F	Rhesus		eventCount	676
R2W3_D00602_Rh_F_Ebola VLPs.fcs	CD11b-/CD16-	CD11b-/CD16-	HLA-DR+/CD7-			Ebola VLPs	D00602	F	Rhesus	HLA-DR+/CD7-	percent	19.616947185142195
R2W3_D00602_Rh_F_Ebola VLPs.fcs	CD11b+/CD16-	CD11b+/CD16-	HLA-DR+/CD7-			Ebola VLPs	D00602	F	Rhesus		eventCount	1077
R2W3_D00602_Rh_F_Ebola VLPs.fcs	CD11b+/CD16-	CD11b+/CD16-	HLA-DR+/CD7-			Ebola VLPs	D00602	F	Rhesus	HLA-DR+/CD7-	percent	31.253627394080095
R2W3_D00602_Rh_F_Ebola VLPs.fcs	CD16+/CD11b-	CD16+/CD11b-	HLA-DR+/CD7-			Ebola VLPs	D00602	F	Rhesus		eventCount	1454
R2W3_D00602_Rh_F_Ebola VLPs.fcs	CD16+/CD11b-	CD16+/CD11b-	HLA-DR+/CD7-			Ebola VLPs	D00602	F	Rhesus	HLA-DR+/CD7-	percent	42.193847939640165
R2W3_D00602_Rh_F_Ebola VLPs.fcs	CD16+/CD11b+	CD16+/CD11b+	HLA-DR+/CD7-			Ebola VLPs	D00602	F	Rhesus		eventCount	212
R2W3_D00602_Rh_F_Ebola VLPs.fcs	CD16+/CD11b+	CD16+/CD11b+	HLA-DR+/CD7-			Ebola VLPs	D00602	F	Rhesus	HLA-DR+/CD7-	percent	6.152060359837493
R2W3_D00602_Rh_F_Ebola VLPs.fcs	Neutrophils	Neutrophils	Non-Basophils			Ebola VLPs	D00602	F	Rhesus		eventCount	43245
R2W3_D00602_Rh_F_Ebola VLPs.fcs	Neutrophils	Neutrophils	Non-Basophils			Ebola VLPs	D00602	F	Rhesus	Non-Basophils	percent	27.56846695226438
R2W3_D00602_Rh_F_Ebola VLPs.fcs	CD8+T cells	CD8+T cells	T Cells			Ebola VLPs	D00602	F	Rhesus		eventCount	28610
R2W3_D00602_Rh_F_Ebola VLPs.fcs	CD8+T cells	CD8+T cells	T Cells			Ebola VLPs	D00602	F	Rhesus	T Cells	percent	40.63170153238749
R2W3_D00602_Rh_F_Ebola VLPs.fcs	CD4+T cells	CD4+T cells	T Cells			Ebola VLPs	D00602	F	Rhesus		eventCount	25323
R2W3_D00602_Rh_F_Ebola VLPs.fcs	CD4+T cells	CD4+T cells	T Cells			Ebola VLPs	D00602	F	Rhesus	T Cells	percent	35.96352946188914
R2W3_D00602_Rh_F_Ebola VLPs.fcs	CD4+/CD8+	CD4+/CD8+	T Cells			Ebola VLPs	D00602	F	Rhesus		eventCount	11323
R2W3_D00602_Rh_F_Ebola VLPs.fcs	CD4+/CD8+	CD4+/CD8+	T Cells			Ebola VLPs	D00602	F	Rhesus	T Cells	percent	16.080837345376565
R2W3_D00602_Rh_F_CD40L.fcs	Basophils	Basophils	Singlets			CD40L	D00602	F	Rhesus		eventCount	308
R2W3_D00602_Rh_F_CD40L.fcs	Basophils	Basophils	Singlets			CD40L	D00602	F	Rhesus	Singlets	percent	0.17931893736063484
R2W3_D00602_Rh_F_CD40L.fcs	B Cells	B Cells	CD45+ CD66-			CD40L	D00602	F	Rhesus		eventCount	6402
R2W3_D00602_Rh_F_CD40L.fcs	B Cells	B Cells	CD45+ CD66-			CD40L	D00602	F	Rhesus	CD45+ CD66-	percent	6.088445078459344
R2W3_D00602_Rh_F_CD40L.fcs	CD1c+ B cells	CD1c+ B cells	B Cells			CD40L	D00602	F	Rhesus		eventCount	1578
R2W3_D00602_Rh_F_CD40L.fcs	CD1c+ B cells	CD1c+ B cells	B Cells			CD40L	D00602	F	Rhesus	B Cells	percent	24.6485473289597
R2W3_D00602_Rh_F_CD40L.fcs	CD7+/HLA-DR-	CD7+/HLA-DR-	CD19- CD3-			CD40L	D00602	F	Rhesus		eventCount	10629
R2W3_D00602_Rh_F_CD40L.fcs	CD7+/HLA-DR-	CD7+/HLA-DR-	CD19- CD3-			CD40L	D00602	F	Rhesus	CD19- CD3-	percent	65.8101665531546
R2W3_D00602_Rh_F_CD40L.fcs	pDCs	pDCs	HLA-DR+ CD11c-			CD40L	D00602	F	Rhesus		eventCount	47
R2W3_D00602_Rh_F_CD40L.fcs	pDCs	pDCs	HLA-DR+ CD11c-			CD40L	D00602	F	Rhesus	HLA-DR+ CD11c-	percent	3.4231609613983975
R2W3_D00602_Rh_F_CD40L.fcs	CD11b-/CD16-	CD11b-/CD16-	HLA-DR+/CD7-			CD40L	D00602	F	Rhesus		eventCount	617
R2W3_D00602_Rh_F_CD40L.fcs	CD11b-/CD16-	CD11b-/CD16-	HLA-DR+/CD7-			CD40L	D00602	F	Rhesus	HLA-DR+/CD7-	percent	15.743812196989028
R2W3_D00602_Rh_F_CD40L.fcs	CD11b+/CD16-	CD11b+/CD16-	HLA-DR+/CD7-			CD40L	D00602	F	Rhesus		eventCount	1334
R2W3_D00602_Rh_F_CD40L.fcs	CD11b+/CD16-	CD11b+/CD16-	HLA-DR+/CD7-			CD40L	D00602	F	Rhesus	HLA-DR+/CD7-	percent	34.03929573870885
R2W3_D00602_Rh_F_CD40L.fcs	CD16+/CD11b-	CD16+/CD11b-	HLA-DR+/CD7-			CD40L	D00602	F	Rhesus		eventCount	1676
R2W3_D00602_Rh_F_CD40L.fcs	CD16+/CD11b-	CD16+/CD11b-	HLA-DR+/CD7-			CD40L	D00602	F	Rhesus	HLA-DR+/CD7-	percent	42.76601173768819
R2W3_D00602_Rh_F_CD40L.fcs	CD16+/CD11b+	CD16+/CD11b+	HLA-DR+/CD7-			CD40L	D00602	F	Rhesus		eventCount	258
R2W3_D00602_Rh_F_CD40L.fcs	CD16+/CD11b+	CD16+/CD11b+	HLA-DR+/CD7-			CD40L	D00602	F	Rhesus	HLA-DR+/CD7-	percent	6.58331206940546
R2W3_D00602_Rh_F_CD40L.fcs	Neutrophils	Neutrophils	Non-Basophils			CD40L	D00602	F	Rhesus		eventCount	45610
R2W3_D00602_Rh_F_CD40L.fcs	Neutrophils	Neutrophils	Non-Basophils			CD40L	D00602	F	Rhesus	Non-Basophils	percent	26.61197626452106
R2W3_D00602_Rh_F_CD40L.fcs	CD8+T cells	CD8+T cells	T Cells			CD40L	D00602	F	Rhesus		eventCount	32512
R2W3_D00602_Rh_F_CD40L.fcs	CD8+T cells	CD8+T cells	T Cells			CD40L	D00602	F	Rhesus	T Cells	percent	40.134803165158566
R2W3_D00602_Rh_F_CD40L.fcs	CD4+T cells	CD4+T cells	T Cells			CD40L	D00602	F	Rhesus		eventCount	30079
R2W3_D00602_Rh_F_CD40L.fcs	CD4+T cells	CD4+T cells	T Cells			CD40L	D00602	F	Rhesus	T Cells	percent	37.13135901835644
R2W3_D00602_Rh_F_CD40L.fcs	CD4+/CD8+	CD4+/CD8+	T Cells			CD40L	D00602	F	Rhesus		eventCount	12175
R2W3_D00602_Rh_F_CD40L.fcs	CD4+/CD8+	CD4+/CD8+	T Cells			CD40L	D00602	F	Rhesus	T Cells	percent	15.029565346204649
R2W3_D00602_Rh_F_Basal.fcs	Basophils	Basophils	Singlets			Basal	D00602	F	Rhesus		eventCount	285
R2W3_D00602_Rh_F_Basal.fcs	Basophils	Basophils	Singlets			Basal	D00602	F	Rhesus	Singlets	percent	0.19791941554743817
R2W3_D00602_Rh_F_Basal.fcs	B Cells	B Cells	CD45+ CD66-			Basal	D00602	F	Rhesus		eventCount	5472
R2W3_D00602_Rh_F_Basal.fcs	B Cells	B Cells	CD45+ CD66-			Basal	D00602	F	Rhesus	CD45+ CD66-	percent	6.082230151055387
R2W3_D00602_Rh_F_Basal.fcs	CD1c+ B cells	CD1c+ B cells	B Cells			Basal	D00602	F	Rhesus		eventCount	1263
R2W3_D00602_Rh_F_Basal.fcs	CD1c+ B cells	CD1c+ B cells	B Cells			Basal	D00602	F	Rhesus	B Cells	percent	23.08114035087719
R2W3_D00602_Rh_F_Basal.fcs	CD7+/HLA-DR-	CD7+/HLA-DR-	CD19- CD3-			Basal	D00602	F	Rhesus		eventCount	9061
R2W3_D00602_Rh_F_Basal.fcs	CD7+/HLA-DR-	CD7+/HLA-DR-	CD19- CD3-			Basal	D00602	F	Rhesus	CD19- CD3-	percent	66.33235724743777
R2W3_D00602_Rh_F_Basal.fcs	pDCs	pDCs	HLA-DR+ CD11c-			Basal	D00602	F	Rhesus		eventCount	38
R2W3_D00602_Rh_F_Basal.fcs	pDCs	pDCs	HLA-DR+ CD11c-			Basal	D00602	F	Rhesus	HLA-DR+ CD11c-	percent	3.4514078110808355
R2W3_D00602_Rh_F_Basal.fcs	CD11b-/CD16-	CD11b-/CD16-	HLA-DR+/CD7-			Basal	D00602	F	Rhesus		eventCount	554
R2W3_D00602_Rh_F_Basal.fcs	CD11b-/CD16-	CD11b-/CD16-	HLA-DR+/CD7-			Basal	D00602	F	Rhesus	HLA-DR+/CD7-	percent	16.71695835847918
R2W3_D00602_Rh_F_Basal.fcs	CD11b+/CD16-	CD11b+/CD16-	HLA-DR+/CD7-			Basal	D00602	F	Rhesus		eventCount	1074
R2W3_D00602_Rh_F_Basal.fcs	CD11b+/CD16-	CD11b+/CD16-	HLA-DR+/CD7-			Basal	D00602	F	Rhesus	HLA-DR+/CD7-	percent	32.4079662039831
R2W3_D00602_Rh_F_Basal.fcs	CD16+/CD11b-	CD16+/CD11b-	HLA-DR+/CD7-			Basal	D00602	F	Rhesus		eventCount	1428
R2W3_D00602_Rh_F_Basal.fcs	CD16+/CD11b-	CD16+/CD11b-	HLA-DR+/CD7-			Basal	D00602	F	Rhesus	HLA-DR+/CD7-	percent	43.089921544960774
R2W3_D00602_Rh_F_Basal.fcs	CD16+/CD11b+	CD16+/CD11b+	HLA-DR+/CD7-			Basal	D00602	F	Rhesus		eventCount	225
R2W3_D00602_Rh_F_Basal.fcs	CD16+/CD11b+	CD16+/CD11b+	HLA-DR+/CD7-			Basal	D00602	F	Rhesus	HLA-DR+/CD7-	percent	6.789378394689197
R2W3_D00602_Rh_F_Basal.fcs	Neutrophils	Neutrophils	Non-Basophils			Basal	D00602	F	Rhesus		eventCount	37640
R2W3_D00602_Rh_F_Basal.fcs	Neutrophils	Neutrophils	Non-Basophils			Basal	D00602	F	Rhesus	Non-Basophils	percent	26.19892809911603
R2W3_D00602_Rh_F_Basal.fcs	CD8+T cells	CD8+T cells	T Cells			Basal	D00602	F	Rhesus		eventCount	28036
R2W3_D00602_Rh_F_Basal.fcs	CD8+T cells	CD8+T cells	T Cells			Basal	D00602	F	Rhesus	T Cells	percent	40.28855549807438
R2W3_D00602_Rh_F_Basal.fcs	CD4+T cells	CD4+T cells	T Cells			Basal	D00602	F	Rhesus		eventCount	25695
R2W3_D00602_Rh_F_Basal.fcs	CD4+T cells	CD4+T cells	T Cells			Basal	D00602	F	Rhesus	T Cells	percent	36.924469736161406
R2W3_D00602_Rh_F_Basal.fcs	CD4+/CD8+	CD4+/CD8+	T Cells			Basal	D00602	F	Rhesus		eventCount	10398
R2W3_D00602_Rh_F_Basal.fcs	CD4+/CD8+	CD4+/CD8+	T Cells			Basal	D00602	F	Rhesus	T Cells	percent	14.94223141921021
R2W3_D00602_Rh_F_Anthrax.fcs	Basophils	Basophils	Singlets			Anthrax	D00602	F	Rhesus		eventCount	402
R2W3_D00602_Rh_F_Anthrax.fcs	Basophils	Basophils	Singlets			Anthrax	D00602	F	Rhesus	Singlets	percent	0.24525355068573382
R2W3_D00602_Rh_F_Anthrax.fcs	B Cells	B Cells	CD45+ CD66-			Anthrax	D00602	F	Rhesus		eventCount	6151
R2W3_D00602_Rh_F_Anthrax.fcs	B Cells	B Cells	CD45+ CD66-			Anthrax	D00602	F	Rhesus	CD45+ CD66-	percent	6.153769196138263
R2W3_D00602_Rh_F_Anthrax.fcs	CD1c+ B cells	CD1c+ B cells	B Cells			Anthrax	D00602	F	Rhesus		eventCount	1474
R2W3_D00602_Rh_F_Anthrax.fcs	CD1c+ B cells	CD1c+ B cells	B Cells			Anthrax	D00602	F	Rhesus	B Cells	percent	23.96358315721021
R2W3_D00602_Rh_F_Anthrax.fcs	CD7+/HLA-DR-	CD7+/HLA-DR-	CD19- CD3-			Anthrax	D00602	F	Rhesus		eventCount	10665
R2W3_D00602_Rh_F_Anthrax.fcs	CD7+/HLA-DR-	CD7+/HLA-DR-	CD19- CD3-			Anthrax	D00602	F	Rhesus	CD19- CD3-	percent	66.45273848837934
R2W3_D00602_Rh_F_Anthrax.fcs	pDCs	pDCs	HLA-DR+ CD11c-			Anthrax	D00602	F	Rhesus		eventCount	47
R2W3_D00602_Rh_F_Anthrax.fcs	pDCs	pDCs	HLA-DR+ CD11c-			Anthrax	D00602	F	Rhesus	HLA-DR+ CD11c-	percent	3.323903818953324
R2W3_D00602_Rh_F_Anthrax.fcs	CD11b-/CD16-	CD11b-/CD16-	HLA-DR+/CD7-			Anthrax	D00602	F	Rhesus		eventCount	622
R2W3_D00602_Rh_F_Anthrax.fcs	CD11b-/CD16-	CD11b-/CD16-	HLA-DR+/CD7-			Anthrax	D00602	F	Rhesus	HLA-DR+/CD7-	percent	15.875446656457376
R2W3_D00602_Rh_F_Anthrax.fcs	CD11b+/CD16-	CD11b+/CD16-	HLA-DR+/CD7-			Anthrax	D00602	F	Rhesus		eventCount	1357
R2W3_D00602_Rh_F_Anthrax.fcs	CD11b+/CD16-	CD11b+/CD16-	HLA-DR+/CD7-			Anthrax	D00602	F	Rhesus	HLA-DR+/CD7-	percent	34.635017866258295
R2W3_D00602_Rh_F_Anthrax.fcs	CD16+/CD11b-	CD16+/CD11b-	HLA-DR+/CD7-			Anthrax	D00602	F	Rhesus		eventCount	1645
R2W3_D00602_Rh_F_Anthrax.fcs	CD16+/CD11b-	CD16+/CD11b-	HLA-DR+/CD7-			Anthrax	D00602	F	Rhesus	HLA-DR+/CD7-	percent	41.98570699336396
R2W3_D00602_Rh_F_Anthrax.fcs	CD16+/CD11b+	CD16+/CD11b+	HLA-DR+/CD7-			Anthrax	D00602	F	Rhesus		eventCount	261
R2W3_D00602_Rh_F_Anthrax.fcs	CD16+/CD11b+	CD16+/CD11b+	HLA-DR+/CD7-			Anthrax	D00602	F	Rhesus	HLA-DR+/CD7-	percent	6.66156202143951
R2W3_D00602_Rh_F_Anthrax.fcs	Neutrophils	Neutrophils	Non-Basophils			Anthrax	D00602	F	Rhesus		eventCount	42251
R2W3_D00602_Rh_F_Anthrax.fcs	Neutrophils	Neutrophils	Non-Basophils			Anthrax	D00602	F	Rhesus	Non-Basophils	percent	25.849653408708527
R2W3_D00602_Rh_F_Anthrax.fcs	CD8+T cells	CD8+T cells	T Cells			Anthrax	D00602	F	Rhesus		eventCount	30946
R2W3_D00602_Rh_F_Anthrax.fcs	CD8+T cells	CD8+T cells	T Cells			Anthrax	D00602	F	Rhesus	T Cells	percent	40.62647692065326
R2W3_D00602_Rh_F_Anthrax.fcs	CD4+T cells	CD4+T cells	T Cells			Anthrax	D00602	F	Rhesus		eventCount	26788
R2W3_D00602_Rh_F_Anthrax.fcs	CD4+T cells	CD4+T cells	T Cells			Anthrax	D00602	F	Rhesus	T Cells	percent	35.16777818621016
R2W3_D00602_Rh_F_Anthrax.fcs	CD4+/CD8+	CD4+/CD8+	T Cells			Anthrax	D00602	F	Rhesus		eventCount	12480
R2W3_D00602_Rh_F_Anthrax.fcs	CD4+/CD8+	CD4+/CD8+	T Cells			Anthrax	D00602	F	Rhesus	T Cells	percent	16.383973113480018
R2W5_D07322_Cy_M_TNFa.fcs	Basophils	Basophils	Singlets			TNFa	D07322	M	Cyno		eventCount	303
R2W5_D07322_Cy_M_TNFa.fcs	Basophils	Basophils	Singlets			TNFa	D07322	M	Cyno	Singlets	percent	0.127474284271861
R2W5_D07322_Cy_M_TNFa.fcs	B Cells	B Cells	CD45+ CD66-			TNFa	D07322	M	Cyno		eventCount	9197
R2W5_D07322_Cy_M_TNFa.fcs	B Cells	B Cells	CD45+ CD66-			TNFa	D07322	M	Cyno	CD45+ CD66-	percent	9.236810653918388
R2W5_D07322_Cy_M_TNFa.fcs	CD1c+ B cells	CD1c+ B cells	B Cells			TNFa	D07322	M	Cyno		eventCount	481
R2W5_D07322_Cy_M_TNFa.fcs	CD1c+ B cells	CD1c+ B cells	B Cells			TNFa	D07322	M	Cyno	B Cells	percent	5.229966293356529
R2W5_D07322_Cy_M_TNFa.fcs	CD7+/HLA-DR-	CD7+/HLA-DR-	CD19- CD3-			TNFa	D07322	M	Cyno		eventCount	13184
R2W5_D07322_Cy_M_TNFa.fcs	CD7+/HLA-DR-	CD7+/HLA-DR-	CD19- CD3-			TNFa	D07322	M	Cyno	CD19- CD3-	percent	39.474235755561544
R2W5_D07322_Cy_M_TNFa.fcs	pDCs	pDCs	HLA-DR+ CD11c-			TNFa	D07322	M	Cyno		eventCount	13
R2W5_D07322_Cy_M_TNFa.fcs	pDCs	pDCs	HLA-DR+ CD11c-			TNFa	D07322	M	Cyno	HLA-DR+ CD11c-	percent	0.21280078572597808
R2W5_D07322_Cy_M_TNFa.fcs	CD11b-/CD16-	CD11b-/CD16-	HLA-DR+/CD7-			TNFa	D07322	M	Cyno		eventCount	714
R2W5_D07322_Cy_M_TNFa.fcs	CD11b-/CD16-	CD11b-/CD16-	HLA-DR+/CD7-			TNFa	D07322	M	Cyno	HLA-DR+/CD7-	percent	8.936170212765957
R2W5_D07322_Cy_M_TNFa.fcs	CD11b+/CD16-	CD11b+/CD16-	HLA-DR+/CD7-			TNFa	D07322	M	Cyno		eventCount	5357
R2W5_D07322_Cy_M_TNFa.fcs	CD11b+/CD16-	CD11b+/CD16-	HLA-DR+/CD7-			TNFa	D07322	M	Cyno	HLA-DR+/CD7-	percent	67.04630788485608
R2W5_D07322_Cy_M_TNFa.fcs	CD16+/CD11b-	CD16+/CD11b-	HLA-DR+/CD7-			TNFa	D07322	M	Cyno		eventCount	1176
R2W5_D07322_Cy_M_TNFa.fcs	CD16+/CD11b-	CD16+/CD11b-	HLA-DR+/CD7-			TNFa	D07322	M	Cyno	HLA-DR+/CD7-	percent	14.71839799749687
R2W5_D07322_Cy_M_TNFa.fcs	CD16+/CD11b+	CD16+/CD11b+	HLA-DR+/CD7-			TNFa	D07322	M	Cyno		eventCount	680
R2W5_D07322_Cy_M_TNFa.fcs	CD16+/CD11b+	CD16+/CD11b+	HLA-DR+/CD7-			TNFa	D07322	M	Cyno	HLA-DR+/CD7-	percent	8.51063829787234
R2W5_D07322_Cy_M_TNFa.fcs	Neutrophils	Neutrophils	Non-Basophils			TNFa	D07322	M	Cyno		eventCount	53153
R2W5_D07322_Cy_M_TNFa.fcs	Neutrophils	Neutrophils	Non-Basophils			TNFa	D07322	M	Cyno	Non-Basophils	percent	22.395769692628562
R2W5_D07322_Cy_M_TNFa.fcs	CD8+T cells	CD8+T cells	T Cells			TNFa	D07322	M	Cyno		eventCount	17829
R2W5_D07322_Cy_M_TNFa.fcs	CD8+T cells	CD8+T cells	T Cells			TNFa	D07322	M	Cyno	T Cells	percent	32.68557390873925
R2W5_D07322_Cy_M_TNFa.fcs	CD4+T cells	CD4+T cells	T Cells			TNFa	D07322	M	Cyno		eventCount	31132
R2W5_D07322_Cy_M_TNFa.fcs	CD4+T cells	CD4+T cells	T Cells			TNFa	D07322	M	Cyno	T Cells	percent	57.0737162447064
R2W5_D07322_Cy_M_TNFa.fcs	CD4+/CD8+	CD4+/CD8+	T Cells			TNFa	D07322	M	Cyno		eventCount	2458
R2W5_D07322_Cy_M_TNFa.fcs	CD4+/CD8+	CD4+/CD8+	T Cells			TNFa	D07322	M	Cyno	T Cells	percent	4.506205657506371
R2W5_D07322_Cy_M_R848.fcs	Basophils	Basophils	Singlets			R848	D07322	M	Cyno		eventCount	349
R2W5_D07322_Cy_M_R848.fcs	Basophils	Basophils	Singlets			R848	D07322	M	Cyno	Singlets	percent	0.1365917043043999
R2W5_D07322_Cy_M_R848.fcs	B Cells	B Cells	CD45+ CD66-			R848	D07322	M	Cyno		eventCount	9427
R2W5_D07322_Cy_M_R848.fcs	B Cells	B Cells	CD45+ CD66-			R848	D07322	M	Cyno	CD45+ CD66-	percent	8.8878622744329
R2W5_D07322_Cy_M_R848.fcs	CD1c+ B cells	CD1c+ B cells	B Cells			R848	D07322	M	Cyno		eventCount	402
R2W5_D07322_Cy_M_R848.fcs	CD1c+ B cells	CD1c+ B cells	B Cells			R848	D07322	M	Cyno	B Cells	percent	4.264347088151055
R2W5_D07322_Cy_M_R848.fcs	CD7+/HLA-DR-	CD7+/HLA-DR-	CD19- CD3-			R848	D07322	M	Cyno		eventCount	14085
R2W5_D07322_Cy_M_R848.fcs	CD7+/HLA-DR-	CD7+/HLA-DR-	CD19- CD3-			R848	D07322	M	Cyno	CD19- CD3-	percent	37.65640038498556
R2W5_D07322_Cy_M_R848.fcs	pDCs	pDCs	HLA-DR+ CD11c-			R848	D07322	M	Cyno		eventCount	6
R2W5_D07322_Cy_M_R848.fcs	pDCs	pDCs	HLA-DR+ CD11c-			R848	D07322	M	Cyno	HLA-DR+ CD11c-	percent	0.09074410163339383
R2W5_D07322_Cy_M_R848.fcs	CD11b-/CD16-	CD11b-/CD16-	HLA-DR+/CD7-			R848	D07322	M	Cyno		eventCount	758
R2W5_D07322_Cy_M_R848.fcs	CD11b-/CD16-	CD11b-/CD16-	HLA-DR+/CD7-			R848	D07322	M	Cyno	HLA-DR+/CD7-	percent	8.800650179960524
R2W5_D07322_Cy_M_R848.fcs	CD11b+/CD16-	CD11b+/CD16-	HLA-DR+/CD7-			R848	D07322	M	Cyno		eventCount	5888
R2W5_D07322_Cy_M_R848.fcs	CD11b+/CD16-	CD11b+/CD16-	HLA-DR+/CD7-			R848	D07322	M	Cyno	HLA-DR+/CD7-	percent	68.36177870660629
R2W5_D07322_Cy_M_R848.fcs	CD16+/CD11b-	CD16+/CD11b-	HLA-DR+/CD7-			R848	D07322	M	Cyno		eventCount	1216
R2W5_D07322_Cy_M_R848.fcs	CD16+/CD11b-	CD16+/CD11b-	HLA-DR+/CD7-			R848	D07322	M	Cyno	HLA-DR+/CD7-	percent	14.118193428538255
R2W5_D07322_Cy_M_R848.fcs	CD16+/CD11b+	CD16+/CD11b+	HLA-DR+/CD7-			R848	D07322	M	Cyno		eventCount	702
R2W5_D07322_Cy_M_R848.fcs	CD16+/CD11b+	CD16+/CD11b+	HLA-DR+/CD7-			R848	D07322	M	Cyno	HLA-DR+/CD7-	percent	8.150470219435737
R2W5_D07322_Cy_M_R848.fcs	Neutrophils	Neutrophils	Non-Basophils			R848	D07322	M	Cyno		eventCount	54688
R2W5_D07322_Cy_M_R848.fcs	Neutrophils	Neutrophils	Non-Basophils			R848	D07322	M	Cyno	Non-Basophils	percent	21.43769943003191
R2W5_D07322_Cy_M_R848.fcs	CD8+T cells	CD8+T cells	T Cells			R848	D07322	M	Cyno		eventCount	18381
R2W5_D07322_Cy_M_R848.fcs	CD8+T cells	CD8+T cells	T Cells			R848	D07322	M	Cyno	T Cells	percent	32.63845730418879
R2W5_D07322_Cy_M_R848.fcs	CD4+T cells	CD4+T cells	T Cells			R848	D07322	M	Cyno		eventCount	31593
R2W5_D07322_Cy_M_R848.fcs	CD4+T cells	CD4+T cells	T Cells			R848	D07322	M	Cyno	T Cells	percent	56.09851377026475
R2W5_D07322_Cy_M_R848.fcs	CD4+/CD8+	CD4+/CD8+	T Cells			R848	D07322	M	Cyno		eventCount	2957
R2W5_D07322_Cy_M_R848.fcs	CD4+/CD8+	CD4+/CD8+	T Cells			R848	D07322	M	Cyno	T Cells	percent	5.250634799438891
R2W5_D07322_Cy_M_PMAIono.fcs	Basophils	Basophils	Singlets			PMAIono	D07322	M	Cyno		eventCount	294
R2W5_D07322_Cy_M_PMAIono.fcs	Basophils	Basophils	Singlets			PMAIono	D07322	M	Cyno	Singlets	percent	0.12867309156797352
R2W5_D07322_Cy_M_PMAIono.fcs	B Cells	B Cells	CD45+ CD66-			PMAIono	D07322	M	Cyno		eventCount	7265
R2W5_D07322_Cy_M_PMAIono.fcs	B Cells	B Cells	CD45+ CD66-			PMAIono	D07322	M	Cyno	CD45+ CD66-	percent	7.910927206402787
R2W5_D07322_Cy_M_PMAIono.fcs	CD1c+ B cells	CD1c+ B cells	B Cells			PMAIono	D07322	M	Cyno		eventCount	353
R2W5_D07322_Cy_M_PMAIono.fcs	CD1c+ B cells	CD1c+ B cells	B Cells			PMAIono	D07322	M	Cyno	B Cells	percent	4.858912594631796
R2W5_D07322_Cy_M_PMAIono.fcs	CD7+/HLA-DR-	CD7+/HLA-DR-	CD19- CD3-			PMAIono	D07322	M	Cyno		eventCount	12733
R2W5_D07322_Cy_M_PMAIono.fcs	CD7+/HLA-DR-	CD7+/HLA-DR-	CD19- CD3-			PMAIono	D07322	M	Cyno	CD19- CD3-	percent	38.52181279119017
R2W5_D07322_Cy_M_PMAIono.fcs	pDCs	pDCs	HLA-DR+ CD11c-			PMAIono	D07322	M	Cyno		eventCount	10
R2W5_D07322_Cy_M_PMAIono.fcs	pDCs	pDCs	HLA-DR+ CD11c-			PMAIono	D07322	M	Cyno	HLA-DR+ CD11c-	percent	0.17806267806267806
R2W5_D07322_Cy_M_PMAIono.fcs	CD11b-/CD16-	CD11b-/CD16-	HLA-DR+/CD7-			PMAIono	D07322	M	Cyno		eventCount	656
R2W5_D07322_Cy_M_PMAIono.fcs	CD11b-/CD16-	CD11b-/CD16-	HLA-DR+/CD7-			PMAIono	D07322	M	Cyno	HLA-DR+/CD7-	percent	8.933678333106359
R2W5_D07322_Cy_M_PMAIono.fcs	CD11b+/CD16-	CD11b+/CD16-	HLA-DR+/CD7-			PMAIono	D07322	M	Cyno		eventCount	4956
R2W5_D07322_Cy_M_PMAIono.fcs	CD11b+/CD16-	CD11b+/CD16-	HLA-DR+/CD7-			PMAIono	D07322	M	Cyno	HLA-DR+/CD7-	percent	67.49285033365109
R2W5_D07322_Cy_M_PMAIono.fcs	CD16+/CD11b-	CD16+/CD11b-	HLA-DR+/CD7-			PMAIono	D07322	M	Cyno		eventCount	1079
R2W5_D07322_Cy_M_PMAIono.fcs	CD16+/CD11b-	CD16+/CD11b-	HLA-DR+/CD7-			PMAIono	D07322	M	Cyno	HLA-DR+/CD7-	percent	14.694266648508783
R2W5_D07322_Cy_M_PMAIono.fcs	CD16+/CD11b+	CD16+/CD11b+	HLA-DR+/CD7-			PMAIono	D07322	M	Cyno		eventCount	595
R2W5_D07322_Cy_M_PMAIono.fcs	CD16+/CD11b+	CD16+/CD11b+	HLA-DR+/CD7-			PMAIono	D07322	M	Cyno	HLA-DR+/CD7-	percent	8.102955195424213
R2W5_D07322_Cy_M_PMAIono.fcs	Neutrophils	Neutrophils	Non-Basophils			PMAIono	D07322	M	Cyno		eventCount	50123
R2W5_D07322_Cy_M_PMAIono.fcs	Neutrophils	Neutrophils	Non-Basophils			PMAIono	D07322	M	Cyno	Non-Basophils	percent	21.97124446587472
R2W5_D07322_Cy_M_PMAIono.fcs	CD8+T cells	CD8+T cells	T Cells			PMAIono	D07322	M	Cyno		eventCount	16064
R2W5_D07322_Cy_M_PMAIono.fcs	CD8+T cells	CD8+T cells	T Cells			PMAIono	D07322	M	Cyno	T Cells	percent	32.66102797657775
R2W5_D07322_Cy_M_PMAIono.fcs	CD4+T cells	CD4+T cells	T Cells			PMAIono	D07322	M	Cyno		eventCount	27783
R2W5_D07322_Cy_M_PMAIono.fcs	CD4+T cells	CD4+T cells	T Cells			PMAIono	D07322	M	Cyno	T Cells	percent	56.48788223812622
R2W5_D07322_Cy_M_PMAIono.fcs	CD4+/CD8+	CD4+/CD8+	T Cells			PMAIono	D07322	M	Cyno		eventCount	2403
R2W5_D07322_Cy_M_PMAIono.fcs	CD4+/CD8+	CD4+/CD8+	T Cells			PMAIono	D07322	M	Cyno	T Cells	percent	4.885735198438517
R2W5_D07322_Cy_M_LPS.fcs	Basophils	Basophils	Singlets			LPS	D07322	M	Cyno		eventCount	329
R2W5_D07322_Cy_M_LPS.fcs	Basophils	Basophils	Singlets			LPS	D07322	M	Cyno	Singlets	percent	0.13924275641405462
R2W5_D07322_Cy_M_LPS.fcs	B Cells	B Cells	CD45+ CD66-			LPS	D07322	M	Cyno		eventCount	8446
R2W5_D07322_Cy_M_LPS.fcs	B Cells	B Cells	CD45+ CD66-			LPS	D07322	M	Cyno	CD45+ CD66-	percent	9.076742861441575
R2W5_D07322_Cy_M_LPS.fcs	CD1c+ B cells	CD1c+ B cells	B Cells			LPS	D07322	M	Cyno		eventCount	496
R2W5_D07322_Cy_M_LPS.fcs	CD1c+ B cells	CD1c+ B cells	B Cells			LPS	D07322	M	Cyno	B Cells	percent	5.8726024153445415
R2W5_D07322_Cy_M_LPS.fcs	CD7+/HLA-DR-	CD7+/HLA-DR-	CD19- CD3-			LPS	D07322	M	Cyno		eventCount	12706
R2W5_D07322_Cy_M_LPS.fcs	CD7+/HLA-DR-	CD7+/HLA-DR-	CD19- CD3-			LPS	D07322	M	Cyno	CD19- CD3-	percent	39.16286524472938
R2W5_D07322_Cy_M_LPS.fcs	pDCs	pDCs	HLA-DR+ CD11c-			LPS	D07322	M	Cyno		eventCount	13
R2W5_D07322_Cy_M_LPS.fcs	pDCs	pDCs	HLA-DR+ CD11c-			LPS	D07322	M	Cyno	HLA-DR+ CD11c-	percent	0.20809988794621417
R2W5_D07322_Cy_M_LPS.fcs	CD11b-/CD16-	CD11b-/CD16-	HLA-DR+/CD7-			LPS	D07322	M	Cyno		eventCount	701
R2W5_D07322_Cy_M_LPS.fcs	CD11b-/CD16-	CD11b-/CD16-	HLA-DR+/CD7-			LPS	D07322	M	Cyno	HLA-DR+/CD7-	percent	8.586477217050465
R2W5_D07322_Cy_M_LPS.fcs	CD11b+/CD16-	CD11b+/CD16-	HLA-DR+/CD7-			LPS	D07322	M	Cyno		eventCount	5549
R2W5_D07322_Cy_M_LPS.fcs	CD11b+/CD16-	CD11b+/CD16-	HLA-DR+/CD7-			LPS	D07322	M	Cyno	HLA-DR+/CD7-	percent	67.96913277804998
R2W5_D07322_Cy_M_LPS.fcs	CD16+/CD11b-	CD16+/CD11b-	HLA-DR+/CD7-			LPS	D07322	M	Cyno		eventCount	1185
R2W5_D07322_Cy_M_LPS.fcs	CD16+/CD11b-	CD16+/CD11b-	HLA-DR+/CD7-			LPS	D07322	M	Cyno	HLA-DR+/CD7-	percent	14.514943655071043
R2W5_D07322_Cy_M_LPS.fcs	CD16+/CD11b+	CD16+/CD11b+	HLA-DR+/CD7-			LPS	D07322	M	Cyno		eventCount	666
R2W5_D07322_Cy_M_LPS.fcs	CD16+/CD11b+	CD16+/CD11b+	HLA-DR+/CD7-			LPS	D07322	M	Cyno	HLA-DR+/CD7-	percent	8.157765801077902
R2W5_D07322_Cy_M_LPS.fcs	Neutrophils	Neutrophils	Non-Basophils			LPS	D07322	M	Cyno		eventCount	57464
R2W5_D07322_Cy_M_LPS.fcs	Neutrophils	Neutrophils	Non-Basophils			LPS	D07322	M	Cyno	Non-Basophils	percent	24.359577615844067
R2W5_D07322_Cy_M_LPS.fcs	CD8+T cells	CD8+T cells	T Cells			LPS	D07322	M	Cyno		eventCount	16450
R2W5_D07322_Cy_M_LPS.fcs	CD8+T cells	CD8+T cells	T Cells			LPS	D07322	M	Cyno	T Cells	percent	32.99304037385427
R2W5_D07322_Cy_M_LPS.fcs	CD4+T cells	CD4+T cells	T Cells			LPS	D07322	M	Cyno		eventCount	27923
R2W5_D07322_Cy_M_LPS.fcs	CD4+T cells	CD4+T cells	T Cells			LPS	D07322	M	Cyno	T Cells	percent	56.00393108566156
R2W5_D07322_Cy_M_LPS.fcs	CD4+/CD8+	CD4+/CD8+	T Cells			LPS	D07322	M	Cyno		eventCount	2342
R2W5_D07322_Cy_M_LPS.fcs	CD4+/CD8+	CD4+/CD8+	T Cells			LPS	D07322	M	Cyno	T Cells	percent	4.6972462343809545
R2W5_D07322_Cy_M_IL-12.fcs	Basophils	Basophils	Singlets			IL-12	D07322	M	Cyno		eventCount	350
R2W5_D07322_Cy_M_IL-12.fcs	Basophils	Basophils	Singlets			IL-12	D07322	M	Cyno	Singlets	percent	0.14421809071729957
R2W5_D07322_Cy_M_IL-12.fcs	B Cells	B Cells	CD45+ CD66-			IL-12	D07322	M	Cyno		eventCount	9016
R2W5_D07322_Cy_M_IL-12.fcs	B Cells	B Cells	CD45+ CD66-			IL-12	D07322	M	Cyno	CD45+ CD66-	percent	8.148436017244029
R2W5_D07322_Cy_M_IL-12.fcs	CD1c+ B cells	CD1c+ B cells	B Cells			IL-12	D07322	M	Cyno		eventCount	124
R2W5_D07322_Cy_M_IL-12.fcs	CD1c+ B cells	CD1c+ B cells	B Cells			IL-12	D07322	M	Cyno	B Cells	percent	1.375332741792369
R2W5_D07322_Cy_M_IL-12.fcs	CD7+/HLA-DR-	CD7+/HLA-DR-	CD19- CD3-			IL-12	D07322	M	Cyno		eventCount	14088
R2W5_D07322_Cy_M_IL-12.fcs	CD7+/HLA-DR-	CD7+/HLA-DR-	CD19- CD3-			IL-12	D07322	M	Cyno	CD19- CD3-	percent	36.68081339339183
R2W5_D07322_Cy_M_IL-12.fcs	pDCs	pDCs	HLA-DR+ CD11c-			IL-12	D07322	M	Cyno		eventCount	6
R2W5_D07322_Cy_M_IL-12.fcs	pDCs	pDCs	HLA-DR+ CD11c-			IL-12	D07322	M	Cyno	HLA-DR+ CD11c-	percent	0.1463771651622347
R2W5_D07322_Cy_M_IL-12.fcs	CD11b-/CD16-	CD11b-/CD16-	HLA-DR+/CD7-			IL-12	D07322	M	Cyno		eventCount	552
R2W5_D07322_Cy_M_IL-12.fcs	CD11b-/CD16-	CD11b-/CD16-	HLA-DR+/CD7-			IL-12	D07322	M	Cyno	HLA-DR+/CD7-	percent	9.844836811128946
R2W5_D07322_Cy_M_IL-12.fcs	CD11b+/CD16-	CD11b+/CD16-	HLA-DR+/CD7-			IL-12	D07322	M	Cyno		eventCount	3860
R2W5_D07322_Cy_M_IL-12.fcs	CD11b+/CD16-	CD11b+/CD16-	HLA-DR+/CD7-			IL-12	D07322	M	Cyno	HLA-DR+/CD7-	percent	68.84251828072053
R2W5_D07322_Cy_M_IL-12.fcs	CD16+/CD11b-	CD16+/CD11b-	HLA-DR+/CD7-			IL-12	D07322	M	Cyno		eventCount	811
R2W5_D07322_Cy_M_IL-12.fcs	CD16+/CD11b-	CD16+/CD11b-	HLA-DR+/CD7-			IL-12	D07322	M	Cyno	HLA-DR+/CD7-	percent	14.46406277866952
R2W5_D07322_Cy_M_IL-12.fcs	CD16+/CD11b+	CD16+/CD11b+	HLA-DR+/CD7-			IL-12	D07322	M	Cyno		eventCount	333
R2W5_D07322_Cy_M_IL-12.fcs	CD16+/CD11b+	CD16+/CD11b+	HLA-DR+/CD7-			IL-12	D07322	M	Cyno	HLA-DR+/CD7-	percent	5.93900481540931
R2W5_D07322_Cy_M_IL-12.fcs	Neutrophils	Neutrophils	Non-Basophils			IL-12	D07322	M	Cyno		eventCount	39963
R2W5_D07322_Cy_M_IL-12.fcs	Neutrophils	Neutrophils	Non-Basophils			IL-12	D07322	M	Cyno	Non-Basophils	percent	16.502044018664574
R2W5_D07322_Cy_M_IL-12.fcs	CD8+T cells	CD8+T cells	T Cells			IL-12	D07322	M	Cyno		eventCount	17206
R2W5_D07322_Cy_M_IL-12.fcs	CD8+T cells	CD8+T cells	T Cells			IL-12	D07322	M	Cyno	T Cells	percent	30.22414277684092
R2W5_D07322_Cy_M_IL-12.fcs	CD4+T cells	CD4+T cells	T Cells			IL-12	D07322	M	Cyno		eventCount	31251
R2W5_D07322_Cy_M_IL-12.fcs	CD4+T cells	CD4+T cells	T Cells			IL-12	D07322	M	Cyno	T Cells	percent	54.895657672849914
R2W5_D07322_Cy_M_IL-12.fcs	CD4+/CD8+	CD4+/CD8+	T Cells			IL-12	D07322	M	Cyno		eventCount	4908
R2W5_D07322_Cy_M_IL-12.fcs	CD4+/CD8+	CD4+/CD8+	T Cells			IL-12	D07322	M	Cyno	T Cells	percent	8.62141652613828
R2W5_D07322_Cy_M_IL-6.fcs	Basophils	Basophils	Singlets			IL-6	D07322	M	Cyno		eventCount	296
R2W5_D07322_Cy_M_IL-6.fcs	Basophils	Basophils	Singlets			IL-6	D07322	M	Cyno	Singlets	percent	0.12450942864474011
R2W5_D07322_Cy_M_IL-6.fcs	B Cells	B Cells	CD45+ CD66-			IL-6	D07322	M	Cyno		eventCount	8689
R2W5_D07322_Cy_M_IL-6.fcs	B Cells	B Cells	CD45+ CD66-			IL-6	D07322	M	Cyno	CD45+ CD66-	percent	8.90011062400131
R2W5_D07322_Cy_M_IL-6.fcs	CD1c+ B cells	CD1c+ B cells	B Cells			IL-6	D07322	M	Cyno		eventCount	371
R2W5_D07322_Cy_M_IL-6.fcs	CD1c+ B cells	CD1c+ B cells	B Cells			IL-6	D07322	M	Cyno	B Cells	percent	4.269766371274025
R2W5_D07322_Cy_M_IL-6.fcs	CD7+/HLA-DR-	CD7+/HLA-DR-	CD19- CD3-			IL-6	D07322	M	Cyno		eventCount	12916
R2W5_D07322_Cy_M_IL-6.fcs	CD7+/HLA-DR-	CD7+/HLA-DR-	CD19- CD3-			IL-6	D07322	M	Cyno	CD19- CD3-	percent	37.45939675174014
R2W5_D07322_Cy_M_IL-6.fcs	pDCs	pDCs	HLA-DR+ CD11c-			IL-6	D07322	M	Cyno		eventCount	9
R2W5_D07322_Cy_M_IL-6.fcs	pDCs	pDCs	HLA-DR+ CD11c-			IL-6	D07322	M	Cyno	HLA-DR+ CD11c-	percent	0.14278914802475012
R2W5_D07322_Cy_M_IL-6.fcs	CD11b-/CD16-	CD11b-/CD16-	HLA-DR+/CD7-			IL-6	D07322	M	Cyno		eventCount	632
R2W5_D07322_Cy_M_IL-6.fcs	CD11b-/CD16-	CD11b-/CD16-	HLA-DR+/CD7-			IL-6	D07322	M	Cyno	HLA-DR+/CD7-	percent	7.6494795449043815
R2W5_D07322_Cy_M_IL-6.fcs	CD11b+/CD16-	CD11b+/CD16-	HLA-DR+/CD7-			IL-6	D07322	M	Cyno		eventCount	5666
R2W5_D07322_Cy_M_IL-6.fcs	CD11b+/CD16-	CD11b+/CD16-	HLA-DR+/CD7-			IL-6	D07322	M	Cyno	HLA-DR+/CD7-	percent	68.57903655289276
R2W5_D07322_Cy_M_IL-6.fcs	CD16+/CD11b-	CD16+/CD11b-	HLA-DR+/CD7-			IL-6	D07322	M	Cyno		eventCount	1202
R2W5_D07322_Cy_M_IL-6.fcs	CD16+/CD11b-	CD16+/CD11b-	HLA-DR+/CD7-			IL-6	D07322	M	Cyno	HLA-DR+/CD7-	percent	14.548535463568143
R2W5_D07322_Cy_M_IL-6.fcs	CD16+/CD11b+	CD16+/CD11b+	HLA-DR+/CD7-			IL-6	D07322	M	Cyno		eventCount	711
R2W5_D07322_Cy_M_IL-6.fcs	CD16+/CD11b+	CD16+/CD11b+	HLA-DR+/CD7-			IL-6	D07322	M	Cyno	HLA-DR+/CD7-	percent	8.60566448801743
R2W5_D07322_Cy_M_IL-6.fcs	Neutrophils	Neutrophils	Non-Basophils			IL-6	D07322	M	Cyno		eventCount	52691
R2W5_D07322_Cy_M_IL-6.fcs	Neutrophils	Neutrophils	Non-Basophils			IL-6	D07322	M	Cyno	Non-Basophils	percent	22.196057947082636
R2W5_D07322_Cy_M_IL-6.fcs	CD8+T cells	CD8+T cells	T Cells			IL-6	D07322	M	Cyno		eventCount	17414
R2W5_D07322_Cy_M_IL-6.fcs	CD8+T cells	CD8+T cells	T Cells			IL-6	D07322	M	Cyno	T Cells	percent	33.327591816424565
R2W5_D07322_Cy_M_IL-6.fcs	CD4+T cells	CD4+T cells	T Cells			IL-6	D07322	M	Cyno		eventCount	29426
R2W5_D07322_Cy_M_IL-6.fcs	CD4+T cells	CD4+T cells	T Cells			IL-6	D07322	M	Cyno	T Cells	percent	56.31662551912882
R2W5_D07322_Cy_M_IL-6.fcs	CD4+/CD8+	CD4+/CD8+	T Cells			IL-6	D07322	M	Cyno		eventCount	2252
R2W5_D07322_Cy_M_IL-6.fcs	CD4+/CD8+	CD4+/CD8+	T Cells			IL-6	D07322	M	Cyno	T Cells	percent	4.30996535951465
R2W5_D07322_Cy_M_IL-4.fcs	Basophils	Basophils	Singlets			IL-4	D07322	M	Cyno		eventCount	303
R2W5_D07322_Cy_M_IL-4.fcs	Basophils	Basophils	Singlets			IL-4	D07322	M	Cyno	Singlets	percent	0.1332125773776027
R2W5_D07322_Cy_M_IL-4.fcs	B Cells	B Cells	CD45+ CD66-			IL-4	D07322	M	Cyno		eventCount	7727
R2W5_D07322_Cy_M_IL-4.fcs	B Cells	B Cells	CD45+ CD66-			IL-4	D07322	M	Cyno	CD45+ CD66-	percent	8.378694888421418
R2W5_D07322_Cy_M_IL-4.fcs	CD1c+ B cells	CD1c+ B cells	B Cells			IL-4	D07322	M	Cyno		eventCount	304
R2W5_D07322_Cy_M_IL-4.fcs	CD1c+ B cells	CD1c+ B cells	B Cells			IL-4	D07322	M	Cyno	B Cells	percent	3.9342565031707
R2W5_D07322_Cy_M_IL-4.fcs	CD7+/HLA-DR-	CD7+/HLA-DR-	CD19- CD3-			IL-4	D07322	M	Cyno		eventCount	12346
R2W5_D07322_Cy_M_IL-4.fcs	CD7+/HLA-DR-	CD7+/HLA-DR-	CD19- CD3-			IL-4	D07322	M	Cyno	CD19- CD3-	percent	37.08398414033402
R2W5_D07322_Cy_M_IL-4.fcs	pDCs	pDCs	HLA-DR+ CD11c-			IL-4	D07322	M	Cyno		eventCount	9
R2W5_D07322_Cy_M_IL-4.fcs	pDCs	pDCs	HLA-DR+ CD11c-			IL-4	D07322	M	Cyno	HLA-DR+ CD11c-	percent	0.14720314033366044
R2W5_D07322_Cy_M_IL-4.fcs	CD11b-/CD16-	CD11b-/CD16-	HLA-DR+/CD7-			IL-4	D07322	M	Cyno		eventCount	649
R2W5_D07322_Cy_M_IL-4.fcs	CD11b-/CD16-	CD11b-/CD16-	HLA-DR+/CD7-			IL-4	D07322	M	Cyno	HLA-DR+/CD7-	percent	8.07816778690565
R2W5_D07322_Cy_M_IL-4.fcs	CD11b+/CD16-	CD11b+/CD16-	HLA-DR+/CD7-			IL-4	D07322	M	Cyno		eventCount	5448
R2W5_D07322_Cy_M_IL-4.fcs	CD11b+/CD16-	CD11b+/CD16-	HLA-DR+/CD7-			IL-4	D07322	M	Cyno	HLA-DR+/CD7-	percent	67.8117998506348
R2W5_D07322_Cy_M_IL-4.fcs	CD16+/CD11b-	CD16+/CD11b-	HLA-DR+/CD7-			IL-4	D07322	M	Cyno		eventCount	1201
R2W5_D07322_Cy_M_IL-4.fcs	CD16+/CD11b-	CD16+/CD11b-	HLA-DR+/CD7-			IL-4	D07322	M	Cyno	HLA-DR+/CD7-	percent	14.948966890714464
R2W5_D07322_Cy_M_IL-4.fcs	CD16+/CD11b+	CD16+/CD11b+	HLA-DR+/CD7-			IL-4	D07322	M	Cyno		eventCount	693
R2W5_D07322_Cy_M_IL-4.fcs	CD16+/CD11b+	CD16+/CD11b+	HLA-DR+/CD7-			IL-4	D07322	M	Cyno	HLA-DR+/CD7-	percent	8.625840179238237
R2W5_D07322_Cy_M_IL-4.fcs	Neutrophils	Neutrophils	Non-Basophils			IL-4	D07322	M	Cyno		eventCount	49504
R2W5_D07322_Cy_M_IL-4.fcs	Neutrophils	Neutrophils	Non-Basophils			IL-4	D07322	M	Cyno	Non-Basophils	percent	21.799094640057774
R2W5_D07322_Cy_M_IL-4.fcs	CD8+T cells	CD8+T cells	T Cells			IL-4	D07322	M	Cyno		eventCount	16241
R2W5_D07322_Cy_M_IL-4.fcs	CD8+T cells	CD8+T cells	T Cells			IL-4	D07322	M	Cyno	T Cells	percent	33.127995920448754
R2W5_D07322_Cy_M_IL-4.fcs	CD4+T cells	CD4+T cells	T Cells			IL-4	D07322	M	Cyno		eventCount	27678
R2W5_D07322_Cy_M_IL-4.fcs	CD4+T cells	CD4+T cells	T Cells			IL-4	D07322	M	Cyno	T Cells	percent	56.456909739928605
R2W5_D07322_Cy_M_IL-4.fcs	CD4+/CD8+	CD4+/CD8+	T Cells			IL-4	D07322	M	Cyno		eventCount	2265
R2W5_D07322_Cy_M_IL-4.fcs	CD4+/CD8+	CD4+/CD8+	T Cells			IL-4	D07322	M	Cyno	T Cells	percent	4.62009178990311
R2W5_D07322_Cy_M_IL-2.fcs	Basophils	Basophils	Singlets			IL-2	D07322	M	Cyno		eventCount	403
R2W5_D07322_Cy_M_IL-2.fcs	Basophils	Basophils	Singlets			IL-2	D07322	M	Cyno	Singlets	percent	0.16351670467178991
R2W5_D07322_Cy_M_IL-2.fcs	B Cells	B Cells	CD45+ CD66-			IL-2	D07322	M	Cyno		eventCount	7360
R2W5_D07322_Cy_M_IL-2.fcs	B Cells	B Cells	CD45+ CD66-			IL-2	D07322	M	Cyno	CD45+ CD66-	percent	8.124517054862567
R2W5_D07322_Cy_M_IL-2.fcs	CD1c+ B cells	CD1c+ B cells	B Cells			IL-2	D07322	M	Cyno		eventCount	289
R2W5_D07322_Cy_M_IL-2.fcs	CD1c+ B cells	CD1c+ B cells	B Cells			IL-2	D07322	M	Cyno	B Cells	percent	3.926630434782609
R2W5_D07322_Cy_M_IL-2.fcs	CD7+/HLA-DR-	CD7+/HLA-DR-	CD19- CD3-			IL-2	D07322	M	Cyno		eventCount	12364
R2W5_D07322_Cy_M_IL-2.fcs	CD7+/HLA-DR-	CD7+/HLA-DR-	CD19- CD3-			IL-2	D07322	M	Cyno	CD19- CD3-	percent	37.958983175733756
R2W5_D07322_Cy_M_IL-2.fcs	pDCs	pDCs	HLA-DR+ CD11c-			IL-2	D07322	M	Cyno		eventCount	15
R2W5_D07322_Cy_M_IL-2.fcs	pDCs	pDCs	HLA-DR+ CD11c-			IL-2	D07322	M	Cyno	HLA-DR+ CD11c-	percent	0.22655188038060717
R2W5_D07322_Cy_M_IL-2.fcs	CD11b-/CD16-	CD11b-/CD16-	HLA-DR+/CD7-			IL-2	D07322	M	Cyno		eventCount	687
R2W5_D07322_Cy_M_IL-2.fcs	CD11b-/CD16-	CD11b-/CD16-	HLA-DR+/CD7-			IL-2	D07322	M	Cyno	HLA-DR+/CD7-	percent	7.991159706874491
R2W5_D07322_Cy_M_IL-2.fcs	CD11b+/CD16-	CD11b+/CD16-	HLA-DR+/CD7-			IL-2	D07322	M	Cyno		eventCount	5891
R2W5_D07322_Cy_M_IL-2.fcs	CD11b+/CD16-	CD11b+/CD16-	HLA-DR+/CD7-			IL-2	D07322	M	Cyno	HLA-DR+/CD7-	percent	68.52390368733279
R2W5_D07322_Cy_M_IL-2.fcs	CD16+/CD11b-	CD16+/CD11b-	HLA-DR+/CD7-			IL-2	D07322	M	Cyno		eventCount	1222
R2W5_D07322_Cy_M_IL-2.fcs	CD16+/CD11b-	CD16+/CD11b-	HLA-DR+/CD7-			IL-2	D07322	M	Cyno	HLA-DR+/CD7-	percent	14.214260788647202
R2W5_D07322_Cy_M_IL-2.fcs	CD16+/CD11b+	CD16+/CD11b+	HLA-DR+/CD7-			IL-2	D07322	M	Cyno		eventCount	714
R2W5_D07322_Cy_M_IL-2.fcs	CD16+/CD11b+	CD16+/CD11b+	HLA-DR+/CD7-			IL-2	D07322	M	Cyno	HLA-DR+/CD7-	percent	8.305222752122834
R2W5_D07322_Cy_M_IL-2.fcs	Neutrophils	Neutrophils	Non-Basophils			IL-2	D07322	M	Cyno		eventCount	61385
R2W5_D07322_Cy_M_IL-2.fcs	Neutrophils	Neutrophils	Non-Basophils			IL-2	D07322	M	Cyno	Non-Basophils	percent	24.955483823756595
R2W5_D07322_Cy_M_IL-2.fcs	CD8+T cells	CD8+T cells	T Cells			IL-2	D07322	M	Cyno		eventCount	15367
R2W5_D07322_Cy_M_IL-2.fcs	CD8+T cells	CD8+T cells	T Cells			IL-2	D07322	M	Cyno	T Cells	percent	32.40205794290052
R2W5_D07322_Cy_M_IL-2.fcs	CD4+T cells	CD4+T cells	T Cells			IL-2	D07322	M	Cyno		eventCount	25903
R2W5_D07322_Cy_M_IL-2.fcs	CD4+T cells	CD4+T cells	T Cells			IL-2	D07322	M	Cyno	T Cells	percent	54.61772023784422
R2W5_D07322_Cy_M_IL-2.fcs	CD4+/CD8+	CD4+/CD8+	T Cells			IL-2	D07322	M	Cyno		eventCount	3098
R2W5_D07322_Cy_M_IL-2.fcs	CD4+/CD8+	CD4+/CD8+	T Cells			IL-2	D07322	M	Cyno	T Cells	percent	6.532281870703834
R2W5_D07322_Cy_M_IFNg.fcs	Basophils	Basophils	Singlets			IFNg	D07322	M	Cyno		eventCount	371
R2W5_D07322_Cy_M_IFNg.fcs	Basophils	Basophils	Singlets			IFNg	D07322	M	Cyno	Singlets	percent	0.1251957237730144
R2W5_D07322_Cy_M_IFNg.fcs	B Cells	B Cells	CD45+ CD66-			IFNg	D07322	M	Cyno		eventCount	9952
R2W5_D07322_Cy_M_IFNg.fcs	B Cells	B Cells	CD45+ CD66-			IFNg	D07322	M	Cyno	CD45+ CD66-	percent	8.01714276507645
R2W5_D07322_Cy_M_IFNg.fcs	CD1c+ B cells	CD1c+ B cells	B Cells			IFNg	D07322	M	Cyno		eventCount	289
R2W5_D07322_Cy_M_IFNg.fcs	CD1c+ B cells	CD1c+ B cells	B Cells			IFNg	D07322	M	Cyno	B Cells	percent	2.9039389067524115
R2W5_D07322_Cy_M_IFNg.fcs	CD7+/HLA-DR-	CD7+/HLA-DR-	CD19- CD3-			IFNg	D07322	M	Cyno		eventCount	16805
R2W5_D07322_Cy_M_IFNg.fcs	CD7+/HLA-DR-	CD7+/HLA-DR-	CD19- CD3-			IFNg	D07322	M	Cyno	CD19- CD3-	percent	35.24538590604027
R2W5_D07322_Cy_M_IFNg.fcs	pDCs	pDCs	HLA-DR+ CD11c-			IFNg	D07322	M	Cyno		eventCount	10
R2W5_D07322_Cy_M_IFNg.fcs	pDCs	pDCs	HLA-DR+ CD11c-			IFNg	D07322	M	Cyno	HLA-DR+ CD11c-	percent	0.11706860220088972
R2W5_D07322_Cy_M_IFNg.fcs	CD11b-/CD16-	CD11b-/CD16-	HLA-DR+/CD7-			IFNg	D07322	M	Cyno		eventCount	833
R2W5_D07322_Cy_M_IFNg.fcs	CD11b-/CD16-	CD11b-/CD16-	HLA-DR+/CD7-			IFNg	D07322	M	Cyno	HLA-DR+/CD7-	percent	7.541191381495564
R2W5_D07322_Cy_M_IFNg.fcs	CD11b+/CD16-	CD11b+/CD16-	HLA-DR+/CD7-			IFNg	D07322	M	Cyno		eventCount	7605
R2W5_D07322_Cy_M_IFNg.fcs	CD11b+/CD16-	CD11b+/CD16-	HLA-DR+/CD7-			IFNg	D07322	M	Cyno	HLA-DR+/CD7-	percent	68.84845192829984
R2W5_D07322_Cy_M_IFNg.fcs	CD16+/CD11b-	CD16+/CD11b-	HLA-DR+/CD7-			IFNg	D07322	M	Cyno		eventCount	1619
R2W5_D07322_Cy_M_IFNg.fcs	CD16+/CD11b-	CD16+/CD11b-	HLA-DR+/CD7-			IFNg	D07322	M	Cyno	HLA-DR+/CD7-	percent	14.656889371718268
R2W5_D07322_Cy_M_IFNg.fcs	CD16+/CD11b+	CD16+/CD11b+	HLA-DR+/CD7-			IFNg	D07322	M	Cyno		eventCount	924
R2W5_D07322_Cy_M_IFNg.fcs	CD16+/CD11b+	CD16+/CD11b+	HLA-DR+/CD7-			IFNg	D07322	M	Cyno	HLA-DR+/CD7-	percent	8.365019011406844
R2W5_D07322_Cy_M_IFNg.fcs	Neutrophils	Neutrophils	Non-Basophils			IFNg	D07322	M	Cyno		eventCount	60813
R2W5_D07322_Cy_M_IFNg.fcs	Neutrophils	Neutrophils	Non-Basophils			IFNg	D07322	M	Cyno	Non-Basophils	percent	20.55090330298668
R2W5_D07322_Cy_M_IFNg.fcs	CD8+T cells	CD8+T cells	T Cells			IFNg	D07322	M	Cyno		eventCount	21373
R2W5_D07322_Cy_M_IFNg.fcs	CD8+T cells	CD8+T cells	T Cells			IFNg	D07322	M	Cyno	T Cells	percent	33.334373099178066
R2W5_D07322_Cy_M_IFNg.fcs	CD4+T cells	CD4+T cells	T Cells			IFNg	D07322	M	Cyno		eventCount	36634
R2W5_D07322_Cy_M_IFNg.fcs	CD4+T cells	CD4+T cells	T Cells			IFNg	D07322	M	Cyno	T Cells	percent	57.1361729338553
R2W5_D07322_Cy_M_IFNg.fcs	CD4+/CD8+	CD4+/CD8+	T Cells			IFNg	D07322	M	Cyno		eventCount	2478
R2W5_D07322_Cy_M_IFNg.fcs	CD4+/CD8+	CD4+/CD8+	T Cells			IFNg	D07322	M	Cyno	T Cells	percent	3.8648096448679756
R2W5_D07322_Cy_M_IFNb.fcs	Basophils	Basophils	Singlets			IFNb	D07322	M	Cyno		eventCount	269
R2W5_D07322_Cy_M_IFNb.fcs	Basophils	Basophils	Singlets			IFNb	D07322	M	Cyno	Singlets	percent	0.1287605006820956
R2W5_D07322_Cy_M_IFNb.fcs	B Cells	B Cells	CD45+ CD66-			IFNb	D07322	M	Cyno		eventCount	7288
R2W5_D07322_Cy_M_IFNb.fcs	B Cells	B Cells	CD45+ CD66-			IFNb	D07322	M	Cyno	CD45+ CD66-	percent	8.82602271901567
R2W5_D07322_Cy_M_IFNb.fcs	CD1c+ B cells	CD1c+ B cells	B Cells			IFNb	D07322	M	Cyno		eventCount	387
R2W5_D07322_Cy_M_IFNb.fcs	CD1c+ B cells	CD1c+ B cells	B Cells			IFNb	D07322	M	Cyno	B Cells	percent	5.310098792535675
R2W5_D07322_Cy_M_IFNb.fcs	CD7+/HLA-DR-	CD7+/HLA-DR-	CD19- CD3-			IFNb	D07322	M	Cyno		eventCount	11516
R2W5_D07322_Cy_M_IFNb.fcs	CD7+/HLA-DR-	CD7+/HLA-DR-	CD19- CD3-			IFNb	D07322	M	Cyno	CD19- CD3-	percent	40.157617602957075
R2W5_D07322_Cy_M_IFNb.fcs	pDCs	pDCs	HLA-DR+ CD11c-			IFNb	D07322	M	Cyno		eventCount	14
R2W5_D07322_Cy_M_IFNb.fcs	pDCs	pDCs	HLA-DR+ CD11c-			IFNb	D07322	M	Cyno	HLA-DR+ CD11c-	percent	0.25040243248077265
R2W5_D07322_Cy_M_IFNb.fcs	CD11b-/CD16-	CD11b-/CD16-	HLA-DR+/CD7-			IFNb	D07322	M	Cyno		eventCount	581
R2W5_D07322_Cy_M_IFNb.fcs	CD11b-/CD16-	CD11b-/CD16-	HLA-DR+/CD7-			IFNb	D07322	M	Cyno	HLA-DR+/CD7-	percent	7.976386600768809
R2W5_D07322_Cy_M_IFNb.fcs	CD11b+/CD16-	CD11b+/CD16-	HLA-DR+/CD7-			IFNb	D07322	M	Cyno		eventCount	4970
R2W5_D07322_Cy_M_IFNb.fcs	CD11b+/CD16-	CD11b+/CD16-	HLA-DR+/CD7-			IFNb	D07322	M	Cyno	HLA-DR+/CD7-	percent	68.23174080175728
R2W5_D07322_Cy_M_IFNb.fcs	CD16+/CD11b-	CD16+/CD11b-	HLA-DR+/CD7-			IFNb	D07322	M	Cyno		eventCount	1051
R2W5_D07322_Cy_M_IFNb.fcs	CD16+/CD11b-	CD16+/CD11b-	HLA-DR+/CD7-			IFNb	D07322	M	Cyno	HLA-DR+/CD7-	percent	14.42888522789676
R2W5_D07322_Cy_M_IFNb.fcs	CD16+/CD11b+	CD16+/CD11b+	HLA-DR+/CD7-			IFNb	D07322	M	Cyno		eventCount	627
R2W5_D07322_Cy_M_IFNb.fcs	CD16+/CD11b+	CD16+/CD11b+	HLA-DR+/CD7-			IFNb	D07322	M	Cyno	HLA-DR+/CD7-	percent	8.607907742998352
R2W5_D07322_Cy_M_IFNb.fcs	Neutrophils	Neutrophils	Non-Basophils			IFNb	D07322	M	Cyno		eventCount	51468
R2W5_D07322_Cy_M_IFNb.fcs	Neutrophils	Neutrophils	Non-Basophils			IFNb	D07322	M	Cyno	Non-Basophils	percent	24.67223055793909
R2W5_D07322_Cy_M_IFNb.fcs	CD8+T cells	CD8+T cells	T Cells			IFNb	D07322	M	Cyno		eventCount	14999
R2W5_D07322_Cy_M_IFNb.fcs	CD8+T cells	CD8+T cells	T Cells			IFNb	D07322	M	Cyno	T Cells	percent	33.521812980511356
R2W5_D07322_Cy_M_IFNb.fcs	CD4+T cells	CD4+T cells	T Cells			IFNb	D07322	M	Cyno		eventCount	25209
R2W5_D07322_Cy_M_IFNb.fcs	CD4+T cells	CD4+T cells	T Cells			IFNb	D07322	M	Cyno	T Cells	percent	56.340514929376006
R2W5_D07322_Cy_M_IFNb.fcs	CD4+/CD8+	CD4+/CD8+	T Cells			IFNb	D07322	M	Cyno		eventCount	1880
R2W5_D07322_Cy_M_IFNb.fcs	CD4+/CD8+	CD4+/CD8+	T Cells			IFNb	D07322	M	Cyno	T Cells	percent	4.201680672268908
R2W5_D07322_Cy_M_IFNa2.fcs	Basophils	Basophils	Singlets			IFNa2	D07322	M	Cyno		eventCount	220
R2W5_D07322_Cy_M_IFNa2.fcs	Basophils	Basophils	Singlets			IFNa2	D07322	M	Cyno	Singlets	percent	0.10611307795452572
R2W5_D07322_Cy_M_IFNa2.fcs	B Cells	B Cells	CD45+ CD66-			IFNa2	D07322	M	Cyno		eventCount	7547
R2W5_D07322_Cy_M_IFNa2.fcs	B Cells	B Cells	CD45+ CD66-			IFNa2	D07322	M	Cyno	CD45+ CD66-	percent	9.032265785820288
R2W5_D07322_Cy_M_IFNa2.fcs	CD1c+ B cells	CD1c+ B cells	B Cells			IFNa2	D07322	M	Cyno		eventCount	385
R2W5_D07322_Cy_M_IFNa2.fcs	CD1c+ B cells	CD1c+ B cells	B Cells			IFNa2	D07322	M	Cyno	B Cells	percent	5.1013647807075655
R2W5_D07322_Cy_M_IFNa2.fcs	CD7+/HLA-DR-	CD7+/HLA-DR-	CD19- CD3-			IFNa2	D07322	M	Cyno		eventCount	11464
R2W5_D07322_Cy_M_IFNa2.fcs	CD7+/HLA-DR-	CD7+/HLA-DR-	CD19- CD3-			IFNa2	D07322	M	Cyno	CD19- CD3-	percent	38.648776211988405
R2W5_D07322_Cy_M_IFNa2.fcs	pDCs	pDCs	HLA-DR+ CD11c-			IFNa2	D07322	M	Cyno		eventCount	7
R2W5_D07322_Cy_M_IFNa2.fcs	pDCs	pDCs	HLA-DR+ CD11c-			IFNa2	D07322	M	Cyno	HLA-DR+ CD11c-	percent	0.11752854264607118
R2W5_D07322_Cy_M_IFNa2.fcs	CD11b-/CD16-	CD11b-/CD16-	HLA-DR+/CD7-			IFNa2	D07322	M	Cyno		eventCount	636
R2W5_D07322_Cy_M_IFNa2.fcs	CD11b-/CD16-	CD11b-/CD16-	HLA-DR+/CD7-			IFNa2	D07322	M	Cyno	HLA-DR+/CD7-	percent	8.200103145951521
R2W5_D07322_Cy_M_IFNa2.fcs	CD11b+/CD16-	CD11b+/CD16-	HLA-DR+/CD7-			IFNa2	D07322	M	Cyno		eventCount	5277
R2W5_D07322_Cy_M_IFNa2.fcs	CD11b+/CD16-	CD11b+/CD16-	HLA-DR+/CD7-			IFNa2	D07322	M	Cyno	HLA-DR+/CD7-	percent	68.03764827230532
R2W5_D07322_Cy_M_IFNa2.fcs	CD16+/CD11b-	CD16+/CD11b-	HLA-DR+/CD7-			IFNa2	D07322	M	Cyno		eventCount	1163
R2W5_D07322_Cy_M_IFNa2.fcs	CD16+/CD11b-	CD16+/CD11b-	HLA-DR+/CD7-			IFNa2	D07322	M	Cyno	HLA-DR+/CD7-	percent	14.994842702423929
R2W5_D07322_Cy_M_IFNa2.fcs	CD16+/CD11b+	CD16+/CD11b+	HLA-DR+/CD7-			IFNa2	D07322	M	Cyno		eventCount	627
R2W5_D07322_Cy_M_IFNa2.fcs	CD16+/CD11b+	CD16+/CD11b+	HLA-DR+/CD7-			IFNa2	D07322	M	Cyno	HLA-DR+/CD7-	percent	8.084063950489943
R2W5_D07322_Cy_M_IFNa2.fcs	Neutrophils	Neutrophils	Non-Basophils			IFNa2	D07322	M	Cyno		eventCount	49653
R2W5_D07322_Cy_M_IFNa2.fcs	Neutrophils	Neutrophils	Non-Basophils			IFNa2	D07322	M	Cyno	Non-Basophils	percent	23.97931094433659
R2W5_D07322_Cy_M_IFNa2.fcs	CD8+T cells	CD8+T cells	T Cells			IFNa2	D07322	M	Cyno		eventCount	14945
R2W5_D07322_Cy_M_IFNa2.fcs	CD8+T cells	CD8+T cells	T Cells			IFNa2	D07322	M	Cyno	T Cells	percent	33.28063065069256
R2W5_D07322_Cy_M_IFNa2.fcs	CD4+T cells	CD4+T cells	T Cells			IFNa2	D07322	M	Cyno		eventCount	25745
R2W5_D07322_Cy_M_IFNa2.fcs	CD4+T cells	CD4+T cells	T Cells			IFNa2	D07322	M	Cyno	T Cells	percent	57.3308689262014
R2W5_D07322_Cy_M_IFNa2.fcs	CD4+/CD8+	CD4+/CD8+	T Cells			IFNa2	D07322	M	Cyno		eventCount	1510
R2W5_D07322_Cy_M_IFNa2.fcs	CD4+/CD8+	CD4+/CD8+	T Cells			IFNa2	D07322	M	Cyno	T Cells	percent	3.36257961074244
R2W5_D07322_Cy_M_GM-CSF.fcs	Basophils	Basophils	Singlets			GM-CSF	D07322	M	Cyno		eventCount	220
R2W5_D07322_Cy_M_GM-CSF.fcs	Basophils	Basophils	Singlets			GM-CSF	D07322	M	Cyno	Singlets	percent	0.10663151058075399
R2W5_D07322_Cy_M_GM-CSF.fcs	B Cells	B Cells	CD45+ CD66-			GM-CSF	D07322	M	Cyno		eventCount	7228
R2W5_D07322_Cy_M_GM-CSF.fcs	B Cells	B Cells	CD45+ CD66-			GM-CSF	D07322	M	Cyno	CD45+ CD66-	percent	8.86566578353449
R2W5_D07322_Cy_M_GM-CSF.fcs	CD1c+ B cells	CD1c+ B cells	B Cells			GM-CSF	D07322	M	Cyno		eventCount	381
R2W5_D07322_Cy_M_GM-CSF.fcs	CD1c+ B cells	CD1c+ B cells	B Cells			GM-CSF	D07322	M	Cyno	B Cells	percent	5.271167681239624
R2W5_D07322_Cy_M_GM-CSF.fcs	CD7+/HLA-DR-	CD7+/HLA-DR-	CD19- CD3-			GM-CSF	D07322	M	Cyno		eventCount	11664
R2W5_D07322_Cy_M_GM-CSF.fcs	CD7+/HLA-DR-	CD7+/HLA-DR-	CD19- CD3-			GM-CSF	D07322	M	Cyno	CD19- CD3-	percent	40.065952184666116
R2W5_D07322_Cy_M_GM-CSF.fcs	pDCs	pDCs	HLA-DR+ CD11c-			GM-CSF	D07322	M	Cyno		eventCount	15
R2W5_D07322_Cy_M_GM-CSF.fcs	pDCs	pDCs	HLA-DR+ CD11c-			GM-CSF	D07322	M	Cyno	HLA-DR+ CD11c-	percent	0.2524827470122875
R2W5_D07322_Cy_M_GM-CSF.fcs	CD11b-/CD16-	CD11b-/CD16-	HLA-DR+/CD7-			GM-CSF	D07322	M	Cyno		eventCount	584
R2W5_D07322_Cy_M_GM-CSF.fcs	CD11b-/CD16-	CD11b-/CD16-	HLA-DR+/CD7-			GM-CSF	D07322	M	Cyno	HLA-DR+/CD7-	percent	7.513186671812685
R2W5_D07322_Cy_M_GM-CSF.fcs	CD11b+/CD16-	CD11b+/CD16-	HLA-DR+/CD7-			GM-CSF	D07322	M	Cyno		eventCount	5286
R2W5_D07322_Cy_M_GM-CSF.fcs	CD11b+/CD16-	CD11b+/CD16-	HLA-DR+/CD7-			GM-CSF	D07322	M	Cyno	HLA-DR+/CD7-	percent	68.00463141644153
R2W5_D07322_Cy_M_GM-CSF.fcs	CD16+/CD11b-	CD16+/CD11b-	HLA-DR+/CD7-			GM-CSF	D07322	M	Cyno		eventCount	1184
R2W5_D07322_Cy_M_GM-CSF.fcs	CD16+/CD11b-	CD16+/CD11b-	HLA-DR+/CD7-			GM-CSF	D07322	M	Cyno	HLA-DR+/CD7-	percent	15.232214074359964
R2W5_D07322_Cy_M_GM-CSF.fcs	CD16+/CD11b+	CD16+/CD11b+	HLA-DR+/CD7-			GM-CSF	D07322	M	Cyno		eventCount	683
R2W5_D07322_Cy_M_GM-CSF.fcs	CD16+/CD11b+	CD16+/CD11b+	HLA-DR+/CD7-			GM-CSF	D07322	M	Cyno	HLA-DR+/CD7-	percent	8.786826193232987
R2W5_D07322_Cy_M_GM-CSF.fcs	Neutrophils	Neutrophils	Non-Basophils			GM-CSF	D07322	M	Cyno		eventCount	51389
R2W5_D07322_Cy_M_GM-CSF.fcs	Neutrophils	Neutrophils	Non-Basophils			GM-CSF	D07322	M	Cyno	Non-Basophils	percent	24.939094817963873
R2W5_D07322_Cy_M_GM-CSF.fcs	CD8+T cells	CD8+T cells	T Cells			GM-CSF	D07322	M	Cyno		eventCount	14508
R2W5_D07322_Cy_M_GM-CSF.fcs	CD8+T cells	CD8+T cells	T Cells			GM-CSF	D07322	M	Cyno	T Cells	percent	33.29355608591885
R2W5_D07322_Cy_M_GM-CSF.fcs	CD4+T cells	CD4+T cells	T Cells			GM-CSF	D07322	M	Cyno		eventCount	24729
R2W5_D07322_Cy_M_GM-CSF.fcs	CD4+T cells	CD4+T cells	T Cells			GM-CSF	D07322	M	Cyno	T Cells	percent	56.74912796034514
R2W5_D07322_Cy_M_GM-CSF.fcs	CD4+/CD8+	CD4+/CD8+	T Cells			GM-CSF	D07322	M	Cyno		eventCount	1717
R2W5_D07322_Cy_M_GM-CSF.fcs	CD4+/CD8+	CD4+/CD8+	T Cells			GM-CSF	D07322	M	Cyno	T Cells	percent	3.940242335230402
R2W5_D07322_Cy_M_Ebola VLPs.fcs	Basophils	Basophils	Singlets			Ebola VLPs	D07322	M	Cyno		eventCount	271
R2W5_D07322_Cy_M_Ebola VLPs.fcs	Basophils	Basophils	Singlets			Ebola VLPs	D07322	M	Cyno	Singlets	percent	0.13175294620979347
R2W5_D07322_Cy_M_Ebola VLPs.fcs	B Cells	B Cells	CD45+ CD66-			Ebola VLPs	D07322	M	Cyno		eventCount	6479
R2W5_D07322_Cy_M_Ebola VLPs.fcs	B Cells	B Cells	CD45+ CD66-			Ebola VLPs	D07322	M	Cyno	CD45+ CD66-	percent	8.390965368974538
R2W5_D07322_Cy_M_Ebola VLPs.fcs	CD1c+ B cells	CD1c+ B cells	B Cells			Ebola VLPs	D07322	M	Cyno		eventCount	329
R2W5_D07322_Cy_M_Ebola VLPs.fcs	CD1c+ B cells	CD1c+ B cells	B Cells			Ebola VLPs	D07322	M	Cyno	B Cells	percent	5.07794412718012
R2W5_D07322_Cy_M_Ebola VLPs.fcs	CD7+/HLA-DR-	CD7+/HLA-DR-	CD19- CD3-			Ebola VLPs	D07322	M	Cyno		eventCount	10999
R2W5_D07322_Cy_M_Ebola VLPs.fcs	CD7+/HLA-DR-	CD7+/HLA-DR-	CD19- CD3-			Ebola VLPs	D07322	M	Cyno	CD19- CD3-	percent	38.05487319655399
R2W5_D07322_Cy_M_Ebola VLPs.fcs	pDCs	pDCs	HLA-DR+ CD11c-			Ebola VLPs	D07322	M	Cyno		eventCount	10
R2W5_D07322_Cy_M_Ebola VLPs.fcs	pDCs	pDCs	HLA-DR+ CD11c-			Ebola VLPs	D07322	M	Cyno	HLA-DR+ CD11c-	percent	0.16539861065167052
R2W5_D07322_Cy_M_Ebola VLPs.fcs	CD11b-/CD16-	CD11b-/CD16-	HLA-DR+/CD7-			Ebola VLPs	D07322	M	Cyno		eventCount	586
R2W5_D07322_Cy_M_Ebola VLPs.fcs	CD11b-/CD16-	CD11b-/CD16-	HLA-DR+/CD7-			Ebola VLPs	D07322	M	Cyno	HLA-DR+/CD7-	percent	7.393388846833207
R2W5_D07322_Cy_M_Ebola VLPs.fcs	CD11b+/CD16-	CD11b+/CD16-	HLA-DR+/CD7-			Ebola VLPs	D07322	M	Cyno		eventCount	5370
R2W5_D07322_Cy_M_Ebola VLPs.fcs	CD11b+/CD16-	CD11b+/CD16-	HLA-DR+/CD7-			Ebola VLPs	D07322	M	Cyno	HLA-DR+/CD7-	percent	67.75170325510976
R2W5_D07322_Cy_M_Ebola VLPs.fcs	CD16+/CD11b-	CD16+/CD11b-	HLA-DR+/CD7-			Ebola VLPs	D07322	M	Cyno		eventCount	1182
R2W5_D07322_Cy_M_Ebola VLPs.fcs	CD16+/CD11b-	CD16+/CD11b-	HLA-DR+/CD7-			Ebola VLPs	D07322	M	Cyno	HLA-DR+/CD7-	percent	14.912944738834216
R2W5_D07322_Cy_M_Ebola VLPs.fcs	CD16+/CD11b+	CD16+/CD11b+	HLA-DR+/CD7-			Ebola VLPs	D07322	M	Cyno		eventCount	727
R2W5_D07322_Cy_M_Ebola VLPs.fcs	CD16+/CD11b+	CD16+/CD11b+	HLA-DR+/CD7-			Ebola VLPs	D07322	M	Cyno	HLA-DR+/CD7-	percent	9.172344183699218
R2W5_D07322_Cy_M_Ebola VLPs.fcs	Neutrophils	Neutrophils	Non-Basophils			Ebola VLPs	D07322	M	Cyno		eventCount	52486
R2W5_D07322_Cy_M_Ebola VLPs.fcs	Neutrophils	Neutrophils	Non-Basophils			Ebola VLPs	D07322	M	Cyno	Non-Basophils	percent	25.55592885279267
R2W5_D07322_Cy_M_Ebola VLPs.fcs	CD8+T cells	CD8+T cells	T Cells			Ebola VLPs	D07322	M	Cyno		eventCount	13661
R2W5_D07322_Cy_M_Ebola VLPs.fcs	CD8+T cells	CD8+T cells	T Cells			Ebola VLPs	D07322	M	Cyno	T Cells	percent	33.96062248297121
R2W5_D07322_Cy_M_Ebola VLPs.fcs	CD4+T cells	CD4+T cells	T Cells			Ebola VLPs	D07322	M	Cyno		eventCount	22381
R2W5_D07322_Cy_M_Ebola VLPs.fcs	CD4+T cells	CD4+T cells	T Cells			Ebola VLPs	D07322	M	Cyno	T Cells	percent	55.63814448366728
R2W5_D07322_Cy_M_Ebola VLPs.fcs	CD4+/CD8+	CD4+/CD8+	T Cells			Ebola VLPs	D07322	M	Cyno		eventCount	1710
R2W5_D07322_Cy_M_Ebola VLPs.fcs	CD4+/CD8+	CD4+/CD8+	T Cells			Ebola VLPs	D07322	M	Cyno	T Cells	percent	4.250981951971362
R2W5_D07322_Cy_M_CD40L.fcs	Basophils	Basophils	Singlets			CD40L	D07322	M	Cyno		eventCount	396
R2W5_D07322_Cy_M_CD40L.fcs	Basophils	Basophils	Singlets			CD40L	D07322	M	Cyno	Singlets	percent	0.15826136304597174
R2W5_D07322_Cy_M_CD40L.fcs	B Cells	B Cells	CD45+ CD66-			CD40L	D07322	M	Cyno		eventCount	7837
R2W5_D07322_Cy_M_CD40L.fcs	B Cells	B Cells	CD45+ CD66-			CD40L	D07322	M	Cyno	CD45+ CD66-	percent	8.50535043736841
R2W5_D07322_Cy_M_CD40L.fcs	CD1c+ B cells	CD1c+ B cells	B Cells			CD40L	D07322	M	Cyno		eventCount	470
R2W5_D07322_Cy_M_CD40L.fcs	CD1c+ B cells	CD1c+ B cells	B Cells			CD40L	D07322	M	Cyno	B Cells	percent	5.997192803368636
R2W5_D07322_Cy_M_CD40L.fcs	CD7+/HLA-DR-	CD7+/HLA-DR-	CD19- CD3-			CD40L	D07322	M	Cyno		eventCount	13299
R2W5_D07322_Cy_M_CD40L.fcs	CD7+/HLA-DR-	CD7+/HLA-DR-	CD19- CD3-			CD40L	D07322	M	Cyno	CD19- CD3-	percent	42.49560632688928
R2W5_D07322_Cy_M_CD40L.fcs	pDCs	pDCs	HLA-DR+ CD11c-			CD40L	D07322	M	Cyno		eventCount	8
R2W5_D07322_Cy_M_CD40L.fcs	pDCs	pDCs	HLA-DR+ CD11c-			CD40L	D07322	M	Cyno	HLA-DR+ CD11c-	percent	0.12525442304681383
R2W5_D07322_Cy_M_CD40L.fcs	CD11b-/CD16-	CD11b-/CD16-	HLA-DR+/CD7-			CD40L	D07322	M	Cyno		eventCount	704
R2W5_D07322_Cy_M_CD40L.fcs	CD11b-/CD16-	CD11b-/CD16-	HLA-DR+/CD7-			CD40L	D07322	M	Cyno	HLA-DR+/CD7-	percent	8.395945140131186
R2W5_D07322_Cy_M_CD40L.fcs	CD11b+/CD16-	CD11b+/CD16-	HLA-DR+/CD7-			CD40L	D07322	M	Cyno		eventCount	5669
R2W5_D07322_Cy_M_CD40L.fcs	CD11b+/CD16-	CD11b+/CD16-	HLA-DR+/CD7-			CD40L	D07322	M	Cyno	HLA-DR+/CD7-	percent	67.60882528324389
R2W5_D07322_Cy_M_CD40L.fcs	CD16+/CD11b-	CD16+/CD11b-	HLA-DR+/CD7-			CD40L	D07322	M	Cyno		eventCount	1176
R2W5_D07322_Cy_M_CD40L.fcs	CD16+/CD11b-	CD16+/CD11b-	HLA-DR+/CD7-			CD40L	D07322	M	Cyno	HLA-DR+/CD7-	percent	14.02504472271914
R2W5_D07322_Cy_M_CD40L.fcs	CD16+/CD11b+	CD16+/CD11b+	HLA-DR+/CD7-			CD40L	D07322	M	Cyno		eventCount	758
R2W5_D07322_Cy_M_CD40L.fcs	CD16+/CD11b+	CD16+/CD11b+	HLA-DR+/CD7-			CD40L	D07322	M	Cyno	HLA-DR+/CD7-	percent	9.039952295766248
R2W5_D07322_Cy_M_CD40L.fcs	Neutrophils	Neutrophils	Non-Basophils			CD40L	D07322	M	Cyno		eventCount	65344
R2W5_D07322_Cy_M_CD40L.fcs	Neutrophils	Neutrophils	Non-Basophils			CD40L	D07322	M	Cyno	Non-Basophils	percent	26.163135219974695
R2W5_D07322_Cy_M_CD40L.fcs	CD8+T cells	CD8+T cells	T Cells			CD40L	D07322	M	Cyno		eventCount	16369
R2W5_D07322_Cy_M_CD40L.fcs	CD8+T cells	CD8+T cells	T Cells			CD40L	D07322	M	Cyno	T Cells	percent	32.636825839896325
R2W5_D07322_Cy_M_CD40L.fcs	CD4+T cells	CD4+T cells	T Cells			CD40L	D07322	M	Cyno		eventCount	27712
R2W5_D07322_Cy_M_CD40L.fcs	CD4+T cells	CD4+T cells	T Cells			CD40L	D07322	M	Cyno	T Cells	percent	55.25271657860632
R2W5_D07322_Cy_M_CD40L.fcs	CD4+/CD8+	CD4+/CD8+	T Cells			CD40L	D07322	M	Cyno		eventCount	2924
R2W5_D07322_Cy_M_CD40L.fcs	CD4+/CD8+	CD4+/CD8+	T Cells			CD40L	D07322	M	Cyno	T Cells	percent	5.829927225600638
R2W5_D07322_Cy_M_Basal.fcs	Basophils	Basophils	Singlets			Basal	D07322	M	Cyno		eventCount	273
R2W5_D07322_Cy_M_Basal.fcs	Basophils	Basophils	Singlets			Basal	D07322	M	Cyno	Singlets	percent	0.13564071606373623
R2W5_D07322_Cy_M_Basal.fcs	B Cells	B Cells	CD45+ CD66-			Basal	D07322	M	Cyno		eventCount	7083
R2W5_D07322_Cy_M_Basal.fcs	B Cells	B Cells	CD45+ CD66-			Basal	D07322	M	Cyno	CD45+ CD66-	percent	9.145491168267741
R2W5_D07322_Cy_M_Basal.fcs	CD1c+ B cells	CD1c+ B cells	B Cells			Basal	D07322	M	Cyno		eventCount	372
R2W5_D07322_Cy_M_Basal.fcs	CD1c+ B cells	CD1c+ B cells	B Cells			Basal	D07322	M	Cyno	B Cells	percent	5.252011859381618
R2W5_D07322_Cy_M_Basal.fcs	CD7+/HLA-DR-	CD7+/HLA-DR-	CD19- CD3-			Basal	D07322	M	Cyno		eventCount	10971
R2W5_D07322_Cy_M_Basal.fcs	CD7+/HLA-DR-	CD7+/HLA-DR-	CD19- CD3-			Basal	D07322	M	Cyno	CD19- CD3-	percent	42.3574379367592
R2W5_D07322_Cy_M_Basal.fcs	pDCs	pDCs	HLA-DR+ CD11c-			Basal	D07322	M	Cyno		eventCount	12
R2W5_D07322_Cy_M_Basal.fcs	pDCs	pDCs	HLA-DR+ CD11c-			Basal	D07322	M	Cyno	HLA-DR+ CD11c-	percent	0.22710068130204392
R2W5_D07322_Cy_M_Basal.fcs	CD11b-/CD16-	CD11b-/CD16-	HLA-DR+/CD7-			Basal	D07322	M	Cyno		eventCount	615
R2W5_D07322_Cy_M_Basal.fcs	CD11b-/CD16-	CD11b-/CD16-	HLA-DR+/CD7-			Basal	D07322	M	Cyno	HLA-DR+/CD7-	percent	8.815940366972477
R2W5_D07322_Cy_M_Basal.fcs	CD11b+/CD16-	CD11b+/CD16-	HLA-DR+/CD7-			Basal	D07322	M	Cyno		eventCount	4590
R2W5_D07322_Cy_M_Basal.fcs	CD11b+/CD16-	CD11b+/CD16-	HLA-DR+/CD7-			Basal	D07322	M	Cyno	HLA-DR+/CD7-	percent	65.79701834862385
R2W5_D07322_Cy_M_Basal.fcs	CD16+/CD11b-	CD16+/CD11b-	HLA-DR+/CD7-			Basal	D07322	M	Cyno		eventCount	1084
R2W5_D07322_Cy_M_Basal.fcs	CD16+/CD11b-	CD16+/CD11b-	HLA-DR+/CD7-			Basal	D07322	M	Cyno	HLA-DR+/CD7-	percent	15.538990825688073
R2W5_D07322_Cy_M_Basal.fcs	CD16+/CD11b+	CD16+/CD11b+	HLA-DR+/CD7-			Basal	D07322	M	Cyno		eventCount	636
R2W5_D07322_Cy_M_Basal.fcs	CD16+/CD11b+	CD16+/CD11b+	HLA-DR+/CD7-			Basal	D07322	M	Cyno	HLA-DR+/CD7-	percent	9.11697247706422
R2W5_D07322_Cy_M_Basal.fcs	Neutrophils	Neutrophils	Non-Basophils			Basal	D07322	M	Cyno		eventCount	52744
R2W5_D07322_Cy_M_Basal.fcs	Neutrophils	Neutrophils	Non-Basophils			Basal	D07322	M	Cyno	Non-Basophils	percent	26.248762062118356
R2W5_D07322_Cy_M_Basal.fcs	CD8+T cells	CD8+T cells	T Cells			Basal	D07322	M	Cyno		eventCount	14177
R2W5_D07322_Cy_M_Basal.fcs	CD8+T cells	CD8+T cells	T Cells			Basal	D07322	M	Cyno	T Cells	percent	33.29653811827704
R2W5_D07322_Cy_M_Basal.fcs	CD4+T cells	CD4+T cells	T Cells			Basal	D07322	M	Cyno		eventCount	24092
R2W5_D07322_Cy_M_Basal.fcs	CD4+T cells	CD4+T cells	T Cells			Basal	D07322	M	Cyno	T Cells	percent	56.58321198741134
R2W5_D07322_Cy_M_Basal.fcs	CD4+/CD8+	CD4+/CD8+	T Cells			Basal	D07322	M	Cyno		eventCount	1777
R2W5_D07322_Cy_M_Basal.fcs	CD4+/CD8+	CD4+/CD8+	T Cells			Basal	D07322	M	Cyno	T Cells	percent	4.173516839682465
R2W5_D07322_Cy_M_Anthrax.fcs	Basophils	Basophils	Singlets			Anthrax	D07322	M	Cyno		eventCount	444
R2W5_D07322_Cy_M_Anthrax.fcs	Basophils	Basophils	Singlets			Anthrax	D07322	M	Cyno	Singlets	percent	0.15199181161231134
R2W5_D07322_Cy_M_Anthrax.fcs	B Cells	B Cells	CD45+ CD66-			Anthrax	D07322	M	Cyno		eventCount	10633
R2W5_D07322_Cy_M_Anthrax.fcs	B Cells	B Cells	CD45+ CD66-			Anthrax	D07322	M	Cyno	CD45+ CD66-	percent	8.737776316870738
R2W5_D07322_Cy_M_Anthrax.fcs	CD1c+ B cells	CD1c+ B cells	B Cells			Anthrax	D07322	M	Cyno		eventCount	450
R2W5_D07322_Cy_M_Anthrax.fcs	CD1c+ B cells	CD1c+ B cells	B Cells			Anthrax	D07322	M	Cyno	B Cells	percent	4.232107589579611
R2W5_D07322_Cy_M_Anthrax.fcs	CD7+/HLA-DR-	CD7+/HLA-DR-	CD19- CD3-			Anthrax	D07322	M	Cyno		eventCount	16455
R2W5_D07322_Cy_M_Anthrax.fcs	CD7+/HLA-DR-	CD7+/HLA-DR-	CD19- CD3-			Anthrax	D07322	M	Cyno	CD19- CD3-	percent	38.65852226007283
R2W5_D07322_Cy_M_Anthrax.fcs	pDCs	pDCs	HLA-DR+ CD11c-			Anthrax	D07322	M	Cyno		eventCount	8
R2W5_D07322_Cy_M_Anthrax.fcs	pDCs	pDCs	HLA-DR+ CD11c-			Anthrax	D07322	M	Cyno	HLA-DR+ CD11c-	percent	0.11532362692806689
R2W5_D07322_Cy_M_Anthrax.fcs	CD11b-/CD16-	CD11b-/CD16-	HLA-DR+/CD7-			Anthrax	D07322	M	Cyno		eventCount	787
R2W5_D07322_Cy_M_Anthrax.fcs	CD11b-/CD16-	CD11b-/CD16-	HLA-DR+/CD7-			Anthrax	D07322	M	Cyno	HLA-DR+/CD7-	percent	8.651203693525337
R2W5_D07322_Cy_M_Anthrax.fcs	CD11b+/CD16-	CD11b+/CD16-	HLA-DR+/CD7-			Anthrax	D07322	M	Cyno		eventCount	6227
R2W5_D07322_Cy_M_Anthrax.fcs	CD11b+/CD16-	CD11b+/CD16-	HLA-DR+/CD7-			Anthrax	D07322	M	Cyno	HLA-DR+/CD7-	percent	68.45113773771573
R2W5_D07322_Cy_M_Anthrax.fcs	CD16+/CD11b-	CD16+/CD11b-	HLA-DR+/CD7-			Anthrax	D07322	M	Cyno		eventCount	1292
R2W5_D07322_Cy_M_Anthrax.fcs	CD16+/CD11b-	CD16+/CD11b-	HLA-DR+/CD7-			Anthrax	D07322	M	Cyno	HLA-DR+/CD7-	percent	14.202484335495217
R2W5_D07322_Cy_M_Anthrax.fcs	CD16+/CD11b+	CD16+/CD11b+	HLA-DR+/CD7-			Anthrax	D07322	M	Cyno		eventCount	732
R2W5_D07322_Cy_M_Anthrax.fcs	CD16+/CD11b+	CD16+/CD11b+	HLA-DR+/CD7-			Anthrax	D07322	M	Cyno	HLA-DR+/CD7-	percent	8.046608772122678
R2W5_D07322_Cy_M_Anthrax.fcs	Neutrophils	Neutrophils	Non-Basophils			Anthrax	D07322	M	Cyno		eventCount	59437
R2W5_D07322_Cy_M_Anthrax.fcs	Neutrophils	Neutrophils	Non-Basophils			Anthrax	D07322	M	Cyno	Non-Basophils	percent	20.385016393892418
R2W5_D07322_Cy_M_Anthrax.fcs	CD8+T cells	CD8+T cells	T Cells			Anthrax	D07322	M	Cyno		eventCount	20407
R2W5_D07322_Cy_M_Anthrax.fcs	CD8+T cells	CD8+T cells	T Cells			Anthrax	D07322	M	Cyno	T Cells	percent	31.742106081816768
R2W5_D07322_Cy_M_Anthrax.fcs	CD4+T cells	CD4+T cells	T Cells			Anthrax	D07322	M	Cyno		eventCount	35916
R2W5_D07322_Cy_M_Anthrax.fcs	CD4+T cells	CD4+T cells	T Cells			Anthrax	D07322	M	Cyno	T Cells	percent	55.86560895940271
R2W5_D07322_Cy_M_Anthrax.fcs	CD4+/CD8+	CD4+/CD8+	T Cells			Anthrax	D07322	M	Cyno		eventCount	4090
R2W5_D07322_Cy_M_Anthrax.fcs	CD4+/CD8+	CD4+/CD8+	T Cells			Anthrax	D07322	M	Cyno	T Cells	percent	6.361798102348732
R2W7_D07942_Cy_F_TNFa.fcs	Basophils	Basophils	Singlets			TNFa	D07942	F	Cyno		eventCount	119
R2W7_D07942_Cy_F_TNFa.fcs	Basophils	Basophils	Singlets			TNFa	D07942	F	Cyno	Singlets	percent	0.05074973132495181
R2W7_D07942_Cy_F_TNFa.fcs	B Cells	B Cells	CD45+ CD66-			TNFa	D07942	F	Cyno		eventCount	13359
R2W7_D07942_Cy_F_TNFa.fcs	B Cells	B Cells	CD45+ CD66-			TNFa	D07942	F	Cyno	CD45+ CD66-	percent	8.18651452663574
R2W7_D07942_Cy_F_TNFa.fcs	CD1c+ B cells	CD1c+ B cells	B Cells			TNFa	D07942	F	Cyno		eventCount	1378
R2W7_D07942_Cy_F_TNFa.fcs	CD1c+ B cells	CD1c+ B cells	B Cells			TNFa	D07942	F	Cyno	B Cells	percent	10.315143349053074
R2W7_D07942_Cy_F_TNFa.fcs	CD7+/HLA-DR-	CD7+/HLA-DR-	CD19- CD3-			TNFa	D07942	F	Cyno		eventCount	11589
R2W7_D07942_Cy_F_TNFa.fcs	CD7+/HLA-DR-	CD7+/HLA-DR-	CD19- CD3-			TNFa	D07942	F	Cyno	CD19- CD3-	percent	30.718053383518434
R2W7_D07942_Cy_F_TNFa.fcs	pDCs	pDCs	HLA-DR+ CD11c-			TNFa	D07942	F	Cyno		eventCount	11
R2W7_D07942_Cy_F_TNFa.fcs	pDCs	pDCs	HLA-DR+ CD11c-			TNFa	D07942	F	Cyno	HLA-DR+ CD11c-	percent	0.3003003003003003
R2W7_D07942_Cy_F_TNFa.fcs	CD11b-/CD16-	CD11b-/CD16-	HLA-DR+/CD7-			TNFa	D07942	F	Cyno		eventCount	2025
R2W7_D07942_Cy_F_TNFa.fcs	CD11b-/CD16-	CD11b-/CD16-	HLA-DR+/CD7-			TNFa	D07942	F	Cyno	HLA-DR+/CD7-	percent	43.08510638297872
R2W7_D07942_Cy_F_TNFa.fcs	CD11b+/CD16-	CD11b+/CD16-	HLA-DR+/CD7-			TNFa	D07942	F	Cyno		eventCount	2033
R2W7_D07942_Cy_F_TNFa.fcs	CD11b+/CD16-	CD11b+/CD16-	HLA-DR+/CD7-			TNFa	D07942	F	Cyno	HLA-DR+/CD7-	percent	43.255319148936174
R2W7_D07942_Cy_F_TNFa.fcs	CD16+/CD11b-	CD16+/CD11b-	HLA-DR+/CD7-			TNFa	D07942	F	Cyno		eventCount	269
R2W7_D07942_Cy_F_TNFa.fcs	CD16+/CD11b-	CD16+/CD11b-	HLA-DR+/CD7-			TNFa	D07942	F	Cyno	HLA-DR+/CD7-	percent	5.723404255319149
R2W7_D07942_Cy_F_TNFa.fcs	CD16+/CD11b+	CD16+/CD11b+	HLA-DR+/CD7-			TNFa	D07942	F	Cyno		eventCount	317
R2W7_D07942_Cy_F_TNFa.fcs	CD16+/CD11b+	CD16+/CD11b+	HLA-DR+/CD7-			TNFa	D07942	F	Cyno	HLA-DR+/CD7-	percent	6.74468085106383
R2W7_D07942_Cy_F_TNFa.fcs	Neutrophils	Neutrophils	Non-Basophils			TNFa	D07942	F	Cyno		eventCount	46733
R2W7_D07942_Cy_F_TNFa.fcs	Neutrophils	Neutrophils	Non-Basophils			TNFa	D07942	F	Cyno	Non-Basophils	percent	19.94290201165857
R2W7_D07942_Cy_F_TNFa.fcs	CD8+T cells	CD8+T cells	T Cells			TNFa	D07942	F	Cyno		eventCount	51200
R2W7_D07942_Cy_F_TNFa.fcs	CD8+T cells	CD8+T cells	T Cells			TNFa	D07942	F	Cyno	T Cells	percent	52.40961388854768
R2W7_D07942_Cy_F_TNFa.fcs	CD4+T cells	CD4+T cells	T Cells			TNFa	D07942	F	Cyno		eventCount	34996
R2W7_D07942_Cy_F_TNFa.fcs	CD4+T cells	CD4+T cells	T Cells			TNFa	D07942	F	Cyno	T Cells	percent	35.82278999303935
R2W7_D07942_Cy_F_TNFa.fcs	CD4+/CD8+	CD4+/CD8+	T Cells			TNFa	D07942	F	Cyno		eventCount	7500
R2W7_D07942_Cy_F_TNFa.fcs	CD4+/CD8+	CD4+/CD8+	T Cells			TNFa	D07942	F	Cyno	T Cells	percent	7.677189534455227
R2W7_D07942_Cy_F_R848.fcs	Basophils	Basophils	Singlets			R848	D07942	F	Cyno		eventCount	123
R2W7_D07942_Cy_F_R848.fcs	Basophils	Basophils	Singlets			R848	D07942	F	Cyno	Singlets	percent	0.04769660307119591
R2W7_D07942_Cy_F_R848.fcs	B Cells	B Cells	CD45+ CD66-			R848	D07942	F	Cyno		eventCount	14854
R2W7_D07942_Cy_F_R848.fcs	B Cells	B Cells	CD45+ CD66-			R848	D07942	F	Cyno	CD45+ CD66-	percent	8.215071841782162
R2W7_D07942_Cy_F_R848.fcs	CD1c+ B cells	CD1c+ B cells	B Cells			R848	D07942	F	Cyno		eventCount	1045
R2W7_D07942_Cy_F_R848.fcs	CD1c+ B cells	CD1c+ B cells	B Cells			R848	D07942	F	Cyno	B Cells	percent	7.0351420492796555
R2W7_D07942_Cy_F_R848.fcs	CD7+/HLA-DR-	CD7+/HLA-DR-	CD19- CD3-			R848	D07942	F	Cyno		eventCount	12798
R2W7_D07942_Cy_F_R848.fcs	CD7+/HLA-DR-	CD7+/HLA-DR-	CD19- CD3-			R848	D07942	F	Cyno	CD19- CD3-	percent	30.10373297579564
R2W7_D07942_Cy_F_R848.fcs	pDCs	pDCs	HLA-DR+ CD11c-			R848	D07942	F	Cyno		eventCount	14
R2W7_D07942_Cy_F_R848.fcs	pDCs	pDCs	HLA-DR+ CD11c-			R848	D07942	F	Cyno	HLA-DR+ CD11c-	percent	0.37373198077949815
R2W7_D07942_Cy_F_R848.fcs	CD11b-/CD16-	CD11b-/CD16-	HLA-DR+/CD7-			R848	D07942	F	Cyno		eventCount	2216
R2W7_D07942_Cy_F_R848.fcs	CD11b-/CD16-	CD11b-/CD16-	HLA-DR+/CD7-			R848	D07942	F	Cyno	HLA-DR+/CD7-	percent	45.54048499794492
R2W7_D07942_Cy_F_R848.fcs	CD11b+/CD16-	CD11b+/CD16-	HLA-DR+/CD7-			R848	D07942	F	Cyno		eventCount	2020
R2W7_D07942_Cy_F_R848.fcs	CD11b+/CD16-	CD11b+/CD16-	HLA-DR+/CD7-			R848	D07942	F	Cyno	HLA-DR+/CD7-	percent	41.512535963830665
R2W7_D07942_Cy_F_R848.fcs	CD16+/CD11b-	CD16+/CD11b-	HLA-DR+/CD7-			R848	D07942	F	Cyno		eventCount	275
R2W7_D07942_Cy_F_R848.fcs	CD16+/CD11b-	CD16+/CD11b-	HLA-DR+/CD7-			R848	D07942	F	Cyno	HLA-DR+/CD7-	percent	5.651459103986848
R2W7_D07942_Cy_F_R848.fcs	CD16+/CD11b+	CD16+/CD11b+	HLA-DR+/CD7-			R848	D07942	F	Cyno		eventCount	308
R2W7_D07942_Cy_F_R848.fcs	CD16+/CD11b+	CD16+/CD11b+	HLA-DR+/CD7-			R848	D07942	F	Cyno	HLA-DR+/CD7-	percent	6.329634196465269
R2W7_D07942_Cy_F_R848.fcs	Neutrophils	Neutrophils	Non-Basophils			R848	D07942	F	Cyno		eventCount	50439
R2W7_D07942_Cy_F_R848.fcs	Neutrophils	Neutrophils	Non-Basophils			R848	D07942	F	Cyno	Non-Basophils	percent	19.57230332239063
R2W7_D07942_Cy_F_R848.fcs	CD8+T cells	CD8+T cells	T Cells			R848	D07942	F	Cyno		eventCount	55604
R2W7_D07942_Cy_F_R848.fcs	CD8+T cells	CD8+T cells	T Cells			R848	D07942	F	Cyno	T Cells	percent	51.69147245024124
R2W7_D07942_Cy_F_R848.fcs	CD4+T cells	CD4+T cells	T Cells			R848	D07942	F	Cyno		eventCount	39238
R2W7_D07942_Cy_F_R848.fcs	CD4+T cells	CD4+T cells	T Cells			R848	D07942	F	Cyno	T Cells	percent	36.47705193875559
R2W7_D07942_Cy_F_R848.fcs	CD4+/CD8+	CD4+/CD8+	T Cells			R848	D07942	F	Cyno		eventCount	8291
R2W7_D07942_Cy_F_R848.fcs	CD4+/CD8+	CD4+/CD8+	T Cells			R848	D07942	F	Cyno	T Cells	percent	7.707610928799189
R2W7_D07942_Cy_F_PMAIono.fcs	Basophils	Basophils	Singlets			PMAIono	D07942	F	Cyno		eventCount	139
R2W7_D07942_Cy_F_PMAIono.fcs	Basophils	Basophils	Singlets			PMAIono	D07942	F	Cyno	Singlets	percent	0.053390898196232675
R2W7_D07942_Cy_F_PMAIono.fcs	B Cells	B Cells	CD45+ CD66-			PMAIono	D07942	F	Cyno		eventCount	13507
R2W7_D07942_Cy_F_PMAIono.fcs	B Cells	B Cells	CD45+ CD66-			PMAIono	D07942	F	Cyno	CD45+ CD66-	percent	7.504389181500989
R2W7_D07942_Cy_F_PMAIono.fcs	CD1c+ B cells	CD1c+ B cells	B Cells			PMAIono	D07942	F	Cyno		eventCount	1109
R2W7_D07942_Cy_F_PMAIono.fcs	CD1c+ B cells	CD1c+ B cells	B Cells			PMAIono	D07942	F	Cyno	B Cells	percent	8.210557488709558
R2W7_D07942_Cy_F_PMAIono.fcs	CD7+/HLA-DR-	CD7+/HLA-DR-	CD19- CD3-			PMAIono	D07942	F	Cyno		eventCount	17246
R2W7_D07942_Cy_F_PMAIono.fcs	CD7+/HLA-DR-	CD7+/HLA-DR-	CD19- CD3-			PMAIono	D07942	F	Cyno	CD19- CD3-	percent	37.38078723773192
R2W7_D07942_Cy_F_PMAIono.fcs	pDCs	pDCs	HLA-DR+ CD11c-			PMAIono	D07942	F	Cyno		eventCount	18
R2W7_D07942_Cy_F_PMAIono.fcs	pDCs	pDCs	HLA-DR+ CD11c-			PMAIono	D07942	F	Cyno	HLA-DR+ CD11c-	percent	0.5266237565827969
R2W7_D07942_Cy_F_PMAIono.fcs	CD11b-/CD16-	CD11b-/CD16-	HLA-DR+/CD7-			PMAIono	D07942	F	Cyno		eventCount	2176
R2W7_D07942_Cy_F_PMAIono.fcs	CD11b-/CD16-	CD11b-/CD16-	HLA-DR+/CD7-			PMAIono	D07942	F	Cyno	HLA-DR+/CD7-	percent	48.495654111878764
R2W7_D07942_Cy_F_PMAIono.fcs	CD11b+/CD16-	CD11b+/CD16-	HLA-DR+/CD7-			PMAIono	D07942	F	Cyno		eventCount	1725
R2W7_D07942_Cy_F_PMAIono.fcs	CD11b+/CD16-	CD11b+/CD16-	HLA-DR+/CD7-			PMAIono	D07942	F	Cyno	HLA-DR+/CD7-	percent	38.44439491865389
R2W7_D07942_Cy_F_PMAIono.fcs	CD16+/CD11b-	CD16+/CD11b-	HLA-DR+/CD7-			PMAIono	D07942	F	Cyno		eventCount	270
R2W7_D07942_Cy_F_PMAIono.fcs	CD16+/CD11b-	CD16+/CD11b-	HLA-DR+/CD7-			PMAIono	D07942	F	Cyno	HLA-DR+/CD7-	percent	6.017383552484956
R2W7_D07942_Cy_F_PMAIono.fcs	CD16+/CD11b+	CD16+/CD11b+	HLA-DR+/CD7-			PMAIono	D07942	F	Cyno		eventCount	278
R2W7_D07942_Cy_F_PMAIono.fcs	CD16+/CD11b+	CD16+/CD11b+	HLA-DR+/CD7-			PMAIono	D07942	F	Cyno	HLA-DR+/CD7-	percent	6.195676398484511
R2W7_D07942_Cy_F_PMAIono.fcs	Neutrophils	Neutrophils	Non-Basophils			PMAIono	D07942	F	Cyno		eventCount	50585
R2W7_D07942_Cy_F_PMAIono.fcs	Neutrophils	Neutrophils	Non-Basophils			PMAIono	D07942	F	Cyno	Non-Basophils	percent	19.444028029228505
R2W7_D07942_Cy_F_PMAIono.fcs	CD8+T cells	CD8+T cells	T Cells			PMAIono	D07942	F	Cyno		eventCount	54209
R2W7_D07942_Cy_F_PMAIono.fcs	CD8+T cells	CD8+T cells	T Cells			PMAIono	D07942	F	Cyno	T Cells	percent	51.72910662824207
R2W7_D07942_Cy_F_PMAIono.fcs	CD4+T cells	CD4+T cells	T Cells			PMAIono	D07942	F	Cyno		eventCount	37989
R2W7_D07942_Cy_F_PMAIono.fcs	CD4+T cells	CD4+T cells	T Cells			PMAIono	D07942	F	Cyno	T Cells	percent	36.25112124739966
R2W7_D07942_Cy_F_PMAIono.fcs	CD4+/CD8+	CD4+/CD8+	T Cells			PMAIono	D07942	F	Cyno		eventCount	8264
R2W7_D07942_Cy_F_PMAIono.fcs	CD4+/CD8+	CD4+/CD8+	T Cells			PMAIono	D07942	F	Cyno	T Cells	percent	7.885947668759662
R2W7_D07942_Cy_F_LPS.fcs	Basophils	Basophils	Singlets			LPS	D07942	F	Cyno		eventCount	70
R2W7_D07942_Cy_F_LPS.fcs	Basophils	Basophils	Singlets			LPS	D07942	F	Cyno	Singlets	percent	0.042531473290234774
R2W7_D07942_Cy_F_LPS.fcs	B Cells	B Cells	CD45+ CD66-			LPS	D07942	F	Cyno		eventCount	7378
R2W7_D07942_Cy_F_LPS.fcs	B Cells	B Cells	CD45+ CD66-			LPS	D07942	F	Cyno	CD45+ CD66-	percent	6.196615294167052
R2W7_D07942_Cy_F_LPS.fcs	CD1c+ B cells	CD1c+ B cells	B Cells			LPS	D07942	F	Cyno		eventCount	55
R2W7_D07942_Cy_F_LPS.fcs	CD1c+ B cells	CD1c+ B cells	B Cells			LPS	D07942	F	Cyno	B Cells	percent	0.7454594741122256
R2W7_D07942_Cy_F_LPS.fcs	CD7+/HLA-DR-	CD7+/HLA-DR-	CD19- CD3-			LPS	D07942	F	Cyno		eventCount	8152
R2W7_D07942_Cy_F_LPS.fcs	CD7+/HLA-DR-	CD7+/HLA-DR-	CD19- CD3-			LPS	D07942	F	Cyno	CD19- CD3-	percent	30.049025028567215
R2W7_D07942_Cy_F_LPS.fcs	pDCs	pDCs	HLA-DR+ CD11c-			LPS	D07942	F	Cyno		eventCount	0
R2W7_D07942_Cy_F_LPS.fcs	pDCs	pDCs	HLA-DR+ CD11c-			LPS	D07942	F	Cyno	HLA-DR+ CD11c-	percent	0
R2W7_D07942_Cy_F_LPS.fcs	CD11b-/CD16-	CD11b-/CD16-	HLA-DR+/CD7-			LPS	D07942	F	Cyno		eventCount	1053
R2W7_D07942_Cy_F_LPS.fcs	CD11b-/CD16-	CD11b-/CD16-	HLA-DR+/CD7-			LPS	D07942	F	Cyno	HLA-DR+/CD7-	percent	50.89415176413726
R2W7_D07942_Cy_F_LPS.fcs	CD11b+/CD16-	CD11b+/CD16-	HLA-DR+/CD7-			LPS	D07942	F	Cyno		eventCount	870
R2W7_D07942_Cy_F_LPS.fcs	CD11b+/CD16-	CD11b+/CD16-	HLA-DR+/CD7-			LPS	D07942	F	Cyno	HLA-DR+/CD7-	percent	42.04929917834703
R2W7_D07942_Cy_F_LPS.fcs	CD16+/CD11b-	CD16+/CD11b-	HLA-DR+/CD7-			LPS	D07942	F	Cyno		eventCount	76
R2W7_D07942_Cy_F_LPS.fcs	CD16+/CD11b-	CD16+/CD11b-	HLA-DR+/CD7-			LPS	D07942	F	Cyno	HLA-DR+/CD7-	percent	3.6732721121314644
R2W7_D07942_Cy_F_LPS.fcs	CD16+/CD11b+	CD16+/CD11b+	HLA-DR+/CD7-			LPS	D07942	F	Cyno		eventCount	51
R2W7_D07942_Cy_F_LPS.fcs	CD16+/CD11b+	CD16+/CD11b+	HLA-DR+/CD7-			LPS	D07942	F	Cyno	HLA-DR+/CD7-	percent	2.4649589173513773
R2W7_D07942_Cy_F_LPS.fcs	Neutrophils	Neutrophils	Non-Basophils			LPS	D07942	F	Cyno		eventCount	29324
R2W7_D07942_Cy_F_LPS.fcs	Neutrophils	Neutrophils	Non-Basophils			LPS	D07942	F	Cyno	Non-Basophils	percent	17.827548681658733
R2W7_D07942_Cy_F_LPS.fcs	CD8+T cells	CD8+T cells	T Cells			LPS	D07942	F	Cyno		eventCount	37263
R2W7_D07942_Cy_F_LPS.fcs	CD8+T cells	CD8+T cells	T Cells			LPS	D07942	F	Cyno	T Cells	percent	50.51582728936487
R2W7_D07942_Cy_F_LPS.fcs	CD4+T cells	CD4+T cells	T Cells			LPS	D07942	F	Cyno		eventCount	27512
R2W7_D07942_Cy_F_LPS.fcs	CD4+T cells	CD4+T cells	T Cells			LPS	D07942	F	Cyno	T Cells	percent	37.296820985562256
R2W7_D07942_Cy_F_LPS.fcs	CD4+/CD8+	CD4+/CD8+	T Cells			LPS	D07942	F	Cyno		eventCount	4974
R2W7_D07942_Cy_F_LPS.fcs	CD4+/CD8+	CD4+/CD8+	T Cells			LPS	D07942	F	Cyno	T Cells	percent	6.743035314851217
R2W7_D07942_Cy_F_IL-12.fcs	Basophils	Basophils	Singlets			IL-12	D07942	F	Cyno		eventCount	37
R2W7_D07942_Cy_F_IL-12.fcs	Basophils	Basophils	Singlets			IL-12	D07942	F	Cyno	Singlets	percent	0.1386650676460668
R2W7_D07942_Cy_F_IL-12.fcs	B Cells	B Cells	CD45+ CD66-			IL-12	D07942	F	Cyno		eventCount	945
R2W7_D07942_Cy_F_IL-12.fcs	B Cells	B Cells	CD45+ CD66-			IL-12	D07942	F	Cyno	CD45+ CD66-	percent	5.566682375117813
R2W7_D07942_Cy_F_IL-12.fcs	CD1c+ B cells	CD1c+ B cells	B Cells			IL-12	D07942	F	Cyno		eventCount	75
R2W7_D07942_Cy_F_IL-12.fcs	CD1c+ B cells	CD1c+ B cells	B Cells			IL-12	D07942	F	Cyno	B Cells	percent	7.936507936507937
R2W7_D07942_Cy_F_IL-12.fcs	CD7+/HLA-DR-	CD7+/HLA-DR-	CD19- CD3-			IL-12	D07942	F	Cyno		eventCount	4149
R2W7_D07942_Cy_F_IL-12.fcs	CD7+/HLA-DR-	CD7+/HLA-DR-	CD19- CD3-			IL-12	D07942	F	Cyno	CD19- CD3-	percent	60.853622763273684
R2W7_D07942_Cy_F_IL-12.fcs	pDCs	pDCs	HLA-DR+ CD11c-			IL-12	D07942	F	Cyno		eventCount	1
R2W7_D07942_Cy_F_IL-12.fcs	pDCs	pDCs	HLA-DR+ CD11c-			IL-12	D07942	F	Cyno	HLA-DR+ CD11c-	percent	0.29673590504451036
R2W7_D07942_Cy_F_IL-12.fcs	CD11b-/CD16-	CD11b-/CD16-	HLA-DR+/CD7-			IL-12	D07942	F	Cyno		eventCount	321
R2W7_D07942_Cy_F_IL-12.fcs	CD11b-/CD16-	CD11b-/CD16-	HLA-DR+/CD7-			IL-12	D07942	F	Cyno	HLA-DR+/CD7-	percent	68.44349680170576
R2W7_D07942_Cy_F_IL-12.fcs	CD11b+/CD16-	CD11b+/CD16-	HLA-DR+/CD7-			IL-12	D07942	F	Cyno		eventCount	124
R2W7_D07942_Cy_F_IL-12.fcs	CD11b+/CD16-	CD11b+/CD16-	HLA-DR+/CD7-			IL-12	D07942	F	Cyno	HLA-DR+/CD7-	percent	26.439232409381663
R2W7_D07942_Cy_F_IL-12.fcs	CD16+/CD11b-	CD16+/CD11b-	HLA-DR+/CD7-			IL-12	D07942	F	Cyno		eventCount	14
R2W7_D07942_Cy_F_IL-12.fcs	CD16+/CD11b-	CD16+/CD11b-	HLA-DR+/CD7-			IL-12	D07942	F	Cyno	HLA-DR+/CD7-	percent	2.985074626865672
R2W7_D07942_Cy_F_IL-12.fcs	CD16+/CD11b+	CD16+/CD11b+	HLA-DR+/CD7-			IL-12	D07942	F	Cyno		eventCount	9
R2W7_D07942_Cy_F_IL-12.fcs	CD16+/CD11b+	CD16+/CD11b+	HLA-DR+/CD7-			IL-12	D07942	F	Cyno	HLA-DR+/CD7-	percent	1.9189765458422174
R2W7_D07942_Cy_F_IL-12.fcs	Neutrophils	Neutrophils	Non-Basophils			IL-12	D07942	F	Cyno		eventCount	5743
R2W7_D07942_Cy_F_IL-12.fcs	Neutrophils	Neutrophils	Non-Basophils			IL-12	D07942	F	Cyno	Non-Basophils	percent	21.560235762285544
R2W7_D07942_Cy_F_IL-12.fcs	CD8+T cells	CD8+T cells	T Cells			IL-12	D07942	F	Cyno		eventCount	3240
R2W7_D07942_Cy_F_IL-12.fcs	CD8+T cells	CD8+T cells	T Cells			IL-12	D07942	F	Cyno	T Cells	percent	42.447268439669855
R2W7_D07942_Cy_F_IL-12.fcs	CD4+T cells	CD4+T cells	T Cells			IL-12	D07942	F	Cyno		eventCount	2890
R2W7_D07942_Cy_F_IL-12.fcs	CD4+T cells	CD4+T cells	T Cells			IL-12	D07942	F	Cyno	T Cells	percent	37.8619153674833
R2W7_D07942_Cy_F_IL-12.fcs	CD4+/CD8+	CD4+/CD8+	T Cells			IL-12	D07942	F	Cyno		eventCount	1020
R2W7_D07942_Cy_F_IL-12.fcs	CD4+/CD8+	CD4+/CD8+	T Cells			IL-12	D07942	F	Cyno	T Cells	percent	13.3630289532294
R2W7_D07942_Cy_F_IL-6.fcs	Basophils	Basophils	Singlets			IL-6	D07942	F	Cyno		eventCount	73
R2W7_D07942_Cy_F_IL-6.fcs	Basophils	Basophils	Singlets			IL-6	D07942	F	Cyno	Singlets	percent	0.04077232843506867
R2W7_D07942_Cy_F_IL-6.fcs	B Cells	B Cells	CD45+ CD66-			IL-6	D07942	F	Cyno		eventCount	7835
R2W7_D07942_Cy_F_IL-6.fcs	B Cells	B Cells	CD45+ CD66-			IL-6	D07942	F	Cyno	CD45+ CD66-	percent	6.05393293154072
R2W7_D07942_Cy_F_IL-6.fcs	CD1c+ B cells	CD1c+ B cells	B Cells			IL-6	D07942	F	Cyno		eventCount	36
R2W7_D07942_Cy_F_IL-6.fcs	CD1c+ B cells	CD1c+ B cells	B Cells			IL-6	D07942	F	Cyno	B Cells	percent	0.4594767070835992
R2W7_D07942_Cy_F_IL-6.fcs	CD7+/HLA-DR-	CD7+/HLA-DR-	CD19- CD3-			IL-6	D07942	F	Cyno		eventCount	8506
R2W7_D07942_Cy_F_IL-6.fcs	CD7+/HLA-DR-	CD7+/HLA-DR-	CD19- CD3-			IL-6	D07942	F	Cyno	CD19- CD3-	percent	30.18024411013341
R2W7_D07942_Cy_F_IL-6.fcs	pDCs	pDCs	HLA-DR+ CD11c-			IL-6	D07942	F	Cyno		eventCount	4
R2W7_D07942_Cy_F_IL-6.fcs	pDCs	pDCs	HLA-DR+ CD11c-			IL-6	D07942	F	Cyno	HLA-DR+ CD11c-	percent	0.24169184290030213
R2W7_D07942_Cy_F_IL-6.fcs	CD11b-/CD16-	CD11b-/CD16-	HLA-DR+/CD7-			IL-6	D07942	F	Cyno		eventCount	1048
R2W7_D07942_Cy_F_IL-6.fcs	CD11b-/CD16-	CD11b-/CD16-	HLA-DR+/CD7-			IL-6	D07942	F	Cyno	HLA-DR+/CD7-	percent	48.25046040515654
R2W7_D07942_Cy_F_IL-6.fcs	CD11b+/CD16-	CD11b+/CD16-	HLA-DR+/CD7-			IL-6	D07942	F	Cyno		eventCount	950
R2W7_D07942_Cy_F_IL-6.fcs	CD11b+/CD16-	CD11b+/CD16-	HLA-DR+/CD7-			IL-6	D07942	F	Cyno	HLA-DR+/CD7-	percent	43.73848987108656
R2W7_D07942_Cy_F_IL-6.fcs	CD16+/CD11b-	CD16+/CD11b-	HLA-DR+/CD7-			IL-6	D07942	F	Cyno		eventCount	74
R2W7_D07942_Cy_F_IL-6.fcs	CD16+/CD11b-	CD16+/CD11b-	HLA-DR+/CD7-			IL-6	D07942	F	Cyno	HLA-DR+/CD7-	percent	3.406998158379374
R2W7_D07942_Cy_F_IL-6.fcs	CD16+/CD11b+	CD16+/CD11b+	HLA-DR+/CD7-			IL-6	D07942	F	Cyno		eventCount	71
R2W7_D07942_Cy_F_IL-6.fcs	CD16+/CD11b+	CD16+/CD11b+	HLA-DR+/CD7-			IL-6	D07942	F	Cyno	HLA-DR+/CD7-	percent	3.268876611418048
R2W7_D07942_Cy_F_IL-6.fcs	Neutrophils	Neutrophils	Non-Basophils			IL-6	D07942	F	Cyno		eventCount	31398
R2W7_D07942_Cy_F_IL-6.fcs	Neutrophils	Neutrophils	Non-Basophils			IL-6	D07942	F	Cyno	Non-Basophils	percent	17.54676174562281
R2W7_D07942_Cy_F_IL-6.fcs	CD8+T cells	CD8+T cells	T Cells			IL-6	D07942	F	Cyno		eventCount	40971
R2W7_D07942_Cy_F_IL-6.fcs	CD8+T cells	CD8+T cells	T Cells			IL-6	D07942	F	Cyno	T Cells	percent	50.11314015925242
R2W7_D07942_Cy_F_IL-6.fcs	CD4+T cells	CD4+T cells	T Cells			IL-6	D07942	F	Cyno		eventCount	30666
R2W7_D07942_Cy_F_IL-6.fcs	CD4+T cells	CD4+T cells	T Cells			IL-6	D07942	F	Cyno	T Cells	percent	37.50871485010458
R2W7_D07942_Cy_F_IL-6.fcs	CD4+/CD8+	CD4+/CD8+	T Cells			IL-6	D07942	F	Cyno		eventCount	5561
R2W7_D07942_Cy_F_IL-6.fcs	CD4+/CD8+	CD4+/CD8+	T Cells			IL-6	D07942	F	Cyno	T Cells	percent	6.801864060569737
R2W7_D07942_Cy_F_IL-4.fcs	Basophils	Basophils	Singlets			IL-4	D07942	F	Cyno		eventCount	120
R2W7_D07942_Cy_F_IL-4.fcs	Basophils	Basophils	Singlets			IL-4	D07942	F	Cyno	Singlets	percent	0.04904304753497382
R2W7_D07942_Cy_F_IL-4.fcs	B Cells	B Cells	CD45+ CD66-			IL-4	D07942	F	Cyno		eventCount	12958
R2W7_D07942_Cy_F_IL-4.fcs	B Cells	B Cells	CD45+ CD66-			IL-4	D07942	F	Cyno	CD45+ CD66-	percent	7.747775758155553
R2W7_D07942_Cy_F_IL-4.fcs	CD1c+ B cells	CD1c+ B cells	B Cells			IL-4	D07942	F	Cyno		eventCount	951
R2W7_D07942_Cy_F_IL-4.fcs	CD1c+ B cells	CD1c+ B cells	B Cells			IL-4	D07942	F	Cyno	B Cells	percent	7.339095539435098
R2W7_D07942_Cy_F_IL-4.fcs	CD7+/HLA-DR-	CD7+/HLA-DR-	CD19- CD3-			IL-4	D07942	F	Cyno		eventCount	12889
R2W7_D07942_Cy_F_IL-4.fcs	CD7+/HLA-DR-	CD7+/HLA-DR-	CD19- CD3-			IL-4	D07942	F	Cyno	CD19- CD3-	percent	32.66511227127579
R2W7_D07942_Cy_F_IL-4.fcs	pDCs	pDCs	HLA-DR+ CD11c-			IL-4	D07942	F	Cyno		eventCount	18
R2W7_D07942_Cy_F_IL-4.fcs	pDCs	pDCs	HLA-DR+ CD11c-			IL-4	D07942	F	Cyno	HLA-DR+ CD11c-	percent	0.45743329097839897
R2W7_D07942_Cy_F_IL-4.fcs	CD11b-/CD16-	CD11b-/CD16-	HLA-DR+/CD7-			IL-4	D07942	F	Cyno		eventCount	2206
R2W7_D07942_Cy_F_IL-4.fcs	CD11b-/CD16-	CD11b-/CD16-	HLA-DR+/CD7-			IL-4	D07942	F	Cyno	HLA-DR+/CD7-	percent	43.92672242134608
R2W7_D07942_Cy_F_IL-4.fcs	CD11b+/CD16-	CD11b+/CD16-	HLA-DR+/CD7-			IL-4	D07942	F	Cyno		eventCount	2144
R2W7_D07942_Cy_F_IL-4.fcs	CD11b+/CD16-	CD11b+/CD16-	HLA-DR+/CD7-			IL-4	D07942	F	Cyno	HLA-DR+/CD7-	percent	42.69215452011151
R2W7_D07942_Cy_F_IL-4.fcs	CD16+/CD11b-	CD16+/CD11b-	HLA-DR+/CD7-			IL-4	D07942	F	Cyno		eventCount	283
R2W7_D07942_Cy_F_IL-4.fcs	CD16+/CD11b-	CD16+/CD11b-	HLA-DR+/CD7-			IL-4	D07942	F	Cyno	HLA-DR+/CD7-	percent	5.635205097570689
R2W7_D07942_Cy_F_IL-4.fcs	CD16+/CD11b+	CD16+/CD11b+	HLA-DR+/CD7-			IL-4	D07942	F	Cyno		eventCount	345
R2W7_D07942_Cy_F_IL-4.fcs	CD16+/CD11b+	CD16+/CD11b+	HLA-DR+/CD7-			IL-4	D07942	F	Cyno	HLA-DR+/CD7-	percent	6.8697729988052565
R2W7_D07942_Cy_F_IL-4.fcs	Neutrophils	Neutrophils	Non-Basophils			IL-4	D07942	F	Cyno		eventCount	50612
R2W7_D07942_Cy_F_IL-4.fcs	Neutrophils	Neutrophils	Non-Basophils			IL-4	D07942	F	Cyno	Non-Basophils	percent	20.69783419485703
R2W7_D07942_Cy_F_IL-4.fcs	CD8+T cells	CD8+T cells	T Cells			IL-4	D07942	F	Cyno		eventCount	53221
R2W7_D07942_Cy_F_IL-4.fcs	CD8+T cells	CD8+T cells	T Cells			IL-4	D07942	F	Cyno	T Cells	percent	52.97150421514666
R2W7_D07942_Cy_F_IL-4.fcs	CD4+T cells	CD4+T cells	T Cells			IL-4	D07942	F	Cyno		eventCount	34857
R2W7_D07942_Cy_F_IL-4.fcs	CD4+T cells	CD4+T cells	T Cells			IL-4	D07942	F	Cyno	T Cells	percent	34.69359317614038
R2W7_D07942_Cy_F_IL-4.fcs	CD4+/CD8+	CD4+/CD8+	T Cells			IL-4	D07942	F	Cyno		eventCount	8263
R2W7_D07942_Cy_F_IL-4.fcs	CD4+/CD8+	CD4+/CD8+	T Cells			IL-4	D07942	F	Cyno	T Cells	percent	8.224263717888745
R2W7_D07942_Cy_F_IL-2.fcs	Basophils	Basophils	Singlets			IL-2	D07942	F	Cyno		eventCount	160
R2W7_D07942_Cy_F_IL-2.fcs	Basophils	Basophils	Singlets			IL-2	D07942	F	Cyno	Singlets	percent	0.05777570748159302
R2W7_D07942_Cy_F_IL-2.fcs	B Cells	B Cells	CD45+ CD66-			IL-2	D07942	F	Cyno		eventCount	13570
R2W7_D07942_Cy_F_IL-2.fcs	B Cells	B Cells	CD45+ CD66-			IL-2	D07942	F	Cyno	CD45+ CD66-	percent	7.224233390119251
R2W7_D07942_Cy_F_IL-2.fcs	CD1c+ B cells	CD1c+ B cells	B Cells			IL-2	D07942	F	Cyno		eventCount	779
R2W7_D07942_Cy_F_IL-2.fcs	CD1c+ B cells	CD1c+ B cells	B Cells			IL-2	D07942	F	Cyno	B Cells	percent	5.740604274134119
R2W7_D07942_Cy_F_IL-2.fcs	CD7+/HLA-DR-	CD7+/HLA-DR-	CD19- CD3-			IL-2	D07942	F	Cyno		eventCount	16715
R2W7_D07942_Cy_F_IL-2.fcs	CD7+/HLA-DR-	CD7+/HLA-DR-	CD19- CD3-			IL-2	D07942	F	Cyno	CD19- CD3-	percent	35.06471711174977
R2W7_D07942_Cy_F_IL-2.fcs	pDCs	pDCs	HLA-DR+ CD11c-			IL-2	D07942	F	Cyno		eventCount	13
R2W7_D07942_Cy_F_IL-2.fcs	pDCs	pDCs	HLA-DR+ CD11c-			IL-2	D07942	F	Cyno	HLA-DR+ CD11c-	percent	0.29693924166285973
R2W7_D07942_Cy_F_IL-2.fcs	CD11b-/CD16-	CD11b-/CD16-	HLA-DR+/CD7-			IL-2	D07942	F	Cyno		eventCount	2481
R2W7_D07942_Cy_F_IL-2.fcs	CD11b-/CD16-	CD11b-/CD16-	HLA-DR+/CD7-			IL-2	D07942	F	Cyno	HLA-DR+/CD7-	percent	44.7027027027027
R2W7_D07942_Cy_F_IL-2.fcs	CD11b+/CD16-	CD11b+/CD16-	HLA-DR+/CD7-			IL-2	D07942	F	Cyno		eventCount	2413
R2W7_D07942_Cy_F_IL-2.fcs	CD11b+/CD16-	CD11b+/CD16-	HLA-DR+/CD7-			IL-2	D07942	F	Cyno	HLA-DR+/CD7-	percent	43.47747747747748
R2W7_D07942_Cy_F_IL-2.fcs	CD16+/CD11b-	CD16+/CD11b-	HLA-DR+/CD7-			IL-2	D07942	F	Cyno		eventCount	298
R2W7_D07942_Cy_F_IL-2.fcs	CD16+/CD11b-	CD16+/CD11b-	HLA-DR+/CD7-			IL-2	D07942	F	Cyno	HLA-DR+/CD7-	percent	5.36936936936937
R2W7_D07942_Cy_F_IL-2.fcs	CD16+/CD11b+	CD16+/CD11b+	HLA-DR+/CD7-			IL-2	D07942	F	Cyno		eventCount	312
R2W7_D07942_Cy_F_IL-2.fcs	CD16+/CD11b+	CD16+/CD11b+	HLA-DR+/CD7-			IL-2	D07942	F	Cyno	HLA-DR+/CD7-	percent	5.621621621621622
R2W7_D07942_Cy_F_IL-2.fcs	Neutrophils	Neutrophils	Non-Basophils			IL-2	D07942	F	Cyno		eventCount	58462
R2W7_D07942_Cy_F_IL-2.fcs	Neutrophils	Neutrophils	Non-Basophils			IL-2	D07942	F	Cyno	Non-Basophils	percent	21.126236326776933
R2W7_D07942_Cy_F_IL-2.fcs	CD8+T cells	CD8+T cells	T Cells			IL-2	D07942	F	Cyno		eventCount	57836
R2W7_D07942_Cy_F_IL-2.fcs	CD8+T cells	CD8+T cells	T Cells			IL-2	D07942	F	Cyno	T Cells	percent	52.68354891601385
R2W7_D07942_Cy_F_IL-2.fcs	CD4+T cells	CD4+T cells	T Cells			IL-2	D07942	F	Cyno		eventCount	38161
R2W7_D07942_Cy_F_IL-2.fcs	CD4+T cells	CD4+T cells	T Cells			IL-2	D07942	F	Cyno	T Cells	percent	34.76134086354527
R2W7_D07942_Cy_F_IL-2.fcs	CD4+/CD8+	CD4+/CD8+	T Cells			IL-2	D07942	F	Cyno		eventCount	9356
R2W7_D07942_Cy_F_IL-2.fcs	CD4+/CD8+	CD4+/CD8+	T Cells			IL-2	D07942	F	Cyno	T Cells	percent	8.522499544543633
R2W7_D07942_Cy_F_IFNg.fcs	Basophils	Basophils	Singlets			IFNg	D07942	F	Cyno		eventCount	127
R2W7_D07942_Cy_F_IFNg.fcs	Basophils	Basophils	Singlets			IFNg	D07942	F	Cyno	Singlets	percent	0.0399127576258509
R2W7_D07942_Cy_F_IFNg.fcs	B Cells	B Cells	CD45+ CD66-			IFNg	D07942	F	Cyno		eventCount	17238
R2W7_D07942_Cy_F_IFNg.fcs	B Cells	B Cells	CD45+ CD66-			IFNg	D07942	F	Cyno	CD45+ CD66-	percent	7.764235332270356
R2W7_D07942_Cy_F_IFNg.fcs	CD1c+ B cells	CD1c+ B cells	B Cells			IFNg	D07942	F	Cyno		eventCount	1129
R2W7_D07942_Cy_F_IFNg.fcs	CD1c+ B cells	CD1c+ B cells	B Cells			IFNg	D07942	F	Cyno	B Cells	percent	6.549483698804965
R2W7_D07942_Cy_F_IFNg.fcs	CD7+/HLA-DR-	CD7+/HLA-DR-	CD19- CD3-			IFNg	D07942	F	Cyno		eventCount	15096
R2W7_D07942_Cy_F_IFNg.fcs	CD7+/HLA-DR-	CD7+/HLA-DR-	CD19- CD3-			IFNg	D07942	F	Cyno	CD19- CD3-	percent	29.24391236124833
R2W7_D07942_Cy_F_IFNg.fcs	pDCs	pDCs	HLA-DR+ CD11c-			IFNg	D07942	F	Cyno		eventCount	11
R2W7_D07942_Cy_F_IFNg.fcs	pDCs	pDCs	HLA-DR+ CD11c-			IFNg	D07942	F	Cyno	HLA-DR+ CD11c-	percent	0.21929824561403508
R2W7_D07942_Cy_F_IFNg.fcs	CD11b-/CD16-	CD11b-/CD16-	HLA-DR+/CD7-			IFNg	D07942	F	Cyno		eventCount	2836
R2W7_D07942_Cy_F_IFNg.fcs	CD11b-/CD16-	CD11b-/CD16-	HLA-DR+/CD7-			IFNg	D07942	F	Cyno	HLA-DR+/CD7-	percent	44.48627450980392
R2W7_D07942_Cy_F_IFNg.fcs	CD11b+/CD16-	CD11b+/CD16-	HLA-DR+/CD7-			IFNg	D07942	F	Cyno		eventCount	2781
R2W7_D07942_Cy_F_IFNg.fcs	CD11b+/CD16-	CD11b+/CD16-	HLA-DR+/CD7-			IFNg	D07942	F	Cyno	HLA-DR+/CD7-	percent	43.62352941176471
R2W7_D07942_Cy_F_IFNg.fcs	CD16+/CD11b-	CD16+/CD11b-	HLA-DR+/CD7-			IFNg	D07942	F	Cyno		eventCount	336
R2W7_D07942_Cy_F_IFNg.fcs	CD16+/CD11b-	CD16+/CD11b-	HLA-DR+/CD7-			IFNg	D07942	F	Cyno	HLA-DR+/CD7-	percent	5.270588235294118
R2W7_D07942_Cy_F_IFNg.fcs	CD16+/CD11b+	CD16+/CD11b+	HLA-DR+/CD7-			IFNg	D07942	F	Cyno		eventCount	368
R2W7_D07942_Cy_F_IFNg.fcs	CD16+/CD11b+	CD16+/CD11b+	HLA-DR+/CD7-			IFNg	D07942	F	Cyno	HLA-DR+/CD7-	percent	5.772549019607843
R2W7_D07942_Cy_F_IFNg.fcs	Neutrophils	Neutrophils	Non-Basophils			IFNg	D07942	F	Cyno		eventCount	63311
R2W7_D07942_Cy_F_IFNg.fcs	Neutrophils	Neutrophils	Non-Basophils			IFNg	D07942	F	Cyno	Non-Basophils	percent	19.908618651103115
R2W7_D07942_Cy_F_IFNg.fcs	CD8+T cells	CD8+T cells	T Cells			IFNg	D07942	F	Cyno		eventCount	71003
R2W7_D07942_Cy_F_IFNg.fcs	CD8+T cells	CD8+T cells	T Cells			IFNg	D07942	F	Cyno	T Cells	percent	53.20609371370336
R2W7_D07942_Cy_F_IFNg.fcs	CD4+T cells	CD4+T cells	T Cells			IFNg	D07942	F	Cyno		eventCount	46728
R2W7_D07942_Cy_F_IFNg.fcs	CD4+T cells	CD4+T cells	T Cells			IFNg	D07942	F	Cyno	T Cells	percent	35.01562394622665
R2W7_D07942_Cy_F_IFNg.fcs	CD4+/CD8+	CD4+/CD8+	T Cells			IFNg	D07942	F	Cyno		eventCount	10247
R2W7_D07942_Cy_F_IFNg.fcs	CD4+/CD8+	CD4+/CD8+	T Cells			IFNg	D07942	F	Cyno	T Cells	percent	7.67858882419501
R2W7_D07942_Cy_F_IFNb.fcs	Basophils	Basophils	Singlets			IFNb	D07942	F	Cyno		eventCount	85
R2W7_D07942_Cy_F_IFNb.fcs	Basophils	Basophils	Singlets			IFNb	D07942	F	Cyno	Singlets	percent	0.03905047618610079
R2W7_D07942_Cy_F_IFNb.fcs	B Cells	B Cells	CD45+ CD66-			IFNb	D07942	F	Cyno		eventCount	11799
R2W7_D07942_Cy_F_IFNb.fcs	B Cells	B Cells	CD45+ CD66-			IFNb	D07942	F	Cyno	CD45+ CD66-	percent	7.80739250691476
R2W7_D07942_Cy_F_IFNb.fcs	CD1c+ B cells	CD1c+ B cells	B Cells			IFNb	D07942	F	Cyno		eventCount	983
R2W7_D07942_Cy_F_IFNb.fcs	CD1c+ B cells	CD1c+ B cells	B Cells			IFNb	D07942	F	Cyno	B Cells	percent	8.331214509704212
R2W7_D07942_Cy_F_IFNb.fcs	CD7+/HLA-DR-	CD7+/HLA-DR-	CD19- CD3-			IFNb	D07942	F	Cyno		eventCount	10803
R2W7_D07942_Cy_F_IFNb.fcs	CD7+/HLA-DR-	CD7+/HLA-DR-	CD19- CD3-			IFNb	D07942	F	Cyno	CD19- CD3-	percent	29.743123812670355
R2W7_D07942_Cy_F_IFNb.fcs	pDCs	pDCs	HLA-DR+ CD11c-			IFNb	D07942	F	Cyno		eventCount	15
R2W7_D07942_Cy_F_IFNb.fcs	pDCs	pDCs	HLA-DR+ CD11c-			IFNb	D07942	F	Cyno	HLA-DR+ CD11c-	percent	0.453035336756267
R2W7_D07942_Cy_F_IFNb.fcs	CD11b-/CD16-	CD11b-/CD16-	HLA-DR+/CD7-			IFNb	D07942	F	Cyno		eventCount	1932
R2W7_D07942_Cy_F_IFNb.fcs	CD11b-/CD16-	CD11b-/CD16-	HLA-DR+/CD7-			IFNb	D07942	F	Cyno	HLA-DR+/CD7-	percent	44.72222222222222
R2W7_D07942_Cy_F_IFNb.fcs	CD11b+/CD16-	CD11b+/CD16-	HLA-DR+/CD7-			IFNb	D07942	F	Cyno		eventCount	1807
R2W7_D07942_Cy_F_IFNb.fcs	CD11b+/CD16-	CD11b+/CD16-	HLA-DR+/CD7-			IFNb	D07942	F	Cyno	HLA-DR+/CD7-	percent	41.8287037037037
R2W7_D07942_Cy_F_IFNb.fcs	CD16+/CD11b-	CD16+/CD11b-	HLA-DR+/CD7-			IFNb	D07942	F	Cyno		eventCount	252
R2W7_D07942_Cy_F_IFNb.fcs	CD16+/CD11b-	CD16+/CD11b-	HLA-DR+/CD7-			IFNb	D07942	F	Cyno	HLA-DR+/CD7-	percent	5.833333333333333
R2W7_D07942_Cy_F_IFNb.fcs	CD16+/CD11b+	CD16+/CD11b+	HLA-DR+/CD7-			IFNb	D07942	F	Cyno		eventCount	299
R2W7_D07942_Cy_F_IFNb.fcs	CD16+/CD11b+	CD16+/CD11b+	HLA-DR+/CD7-			IFNb	D07942	F	Cyno	HLA-DR+/CD7-	percent	6.921296296296297
R2W7_D07942_Cy_F_IFNb.fcs	Neutrophils	Neutrophils	Non-Basophils			IFNb	D07942	F	Cyno		eventCount	44109
R2W7_D07942_Cy_F_IFNb.fcs	Neutrophils	Neutrophils	Non-Basophils			IFNb	D07942	F	Cyno	Non-Basophils	percent	20.276177823950427
R2W7_D07942_Cy_F_IFNb.fcs	CD8+T cells	CD8+T cells	T Cells			IFNb	D07942	F	Cyno		eventCount	47187
R2W7_D07942_Cy_F_IFNb.fcs	CD8+T cells	CD8+T cells	T Cells			IFNb	D07942	F	Cyno	T Cells	percent	52.626472162740896
R2W7_D07942_Cy_F_IFNb.fcs	CD4+T cells	CD4+T cells	T Cells			IFNb	D07942	F	Cyno		eventCount	31976
R2W7_D07942_Cy_F_IFNb.fcs	CD4+T cells	CD4+T cells	T Cells			IFNb	D07942	F	Cyno	T Cells	percent	35.66202712348323
R2W7_D07942_Cy_F_IFNb.fcs	CD4+/CD8+	CD4+/CD8+	T Cells			IFNb	D07942	F	Cyno		eventCount	6704
R2W7_D07942_Cy_F_IFNb.fcs	CD4+/CD8+	CD4+/CD8+	T Cells			IFNb	D07942	F	Cyno	T Cells	percent	7.476802284082798
R2W7_D07942_Cy_F_IFNa2.fcs	Basophils	Basophils	Singlets			IFNa2	D07942	F	Cyno		eventCount	95
R2W7_D07942_Cy_F_IFNa2.fcs	Basophils	Basophils	Singlets			IFNa2	D07942	F	Cyno	Singlets	percent	0.04803899755253949
R2W7_D07942_Cy_F_IFNa2.fcs	B Cells	B Cells	CD45+ CD66-			IFNa2	D07942	F	Cyno		eventCount	11490
R2W7_D07942_Cy_F_IFNa2.fcs	B Cells	B Cells	CD45+ CD66-			IFNa2	D07942	F	Cyno	CD45+ CD66-	percent	8.302623021894645
R2W7_D07942_Cy_F_IFNa2.fcs	CD1c+ B cells	CD1c+ B cells	B Cells			IFNa2	D07942	F	Cyno		eventCount	1011
R2W7_D07942_Cy_F_IFNa2.fcs	CD1c+ B cells	CD1c+ B cells	B Cells			IFNa2	D07942	F	Cyno	B Cells	percent	8.798955613577023
R2W7_D07942_Cy_F_IFNa2.fcs	CD7+/HLA-DR-	CD7+/HLA-DR-	CD19- CD3-			IFNa2	D07942	F	Cyno		eventCount	9244
R2W7_D07942_Cy_F_IFNa2.fcs	CD7+/HLA-DR-	CD7+/HLA-DR-	CD19- CD3-			IFNa2	D07942	F	Cyno	CD19- CD3-	percent	28.846033826374587
R2W7_D07942_Cy_F_IFNa2.fcs	pDCs	pDCs	HLA-DR+ CD11c-			IFNa2	D07942	F	Cyno		eventCount	15
R2W7_D07942_Cy_F_IFNa2.fcs	pDCs	pDCs	HLA-DR+ CD11c-			IFNa2	D07942	F	Cyno	HLA-DR+ CD11c-	percent	0.47244094488188976
R2W7_D07942_Cy_F_IFNa2.fcs	CD11b-/CD16-	CD11b-/CD16-	HLA-DR+/CD7-			IFNa2	D07942	F	Cyno		eventCount	1703
R2W7_D07942_Cy_F_IFNa2.fcs	CD11b-/CD16-	CD11b-/CD16-	HLA-DR+/CD7-			IFNa2	D07942	F	Cyno	HLA-DR+/CD7-	percent	41.65851272015656
R2W7_D07942_Cy_F_IFNa2.fcs	CD11b+/CD16-	CD11b+/CD16-	HLA-DR+/CD7-			IFNa2	D07942	F	Cyno		eventCount	1770
R2W7_D07942_Cy_F_IFNa2.fcs	CD11b+/CD16-	CD11b+/CD16-	HLA-DR+/CD7-			IFNa2	D07942	F	Cyno	HLA-DR+/CD7-	percent	43.297455968688844
R2W7_D07942_Cy_F_IFNa2.fcs	CD16+/CD11b-	CD16+/CD11b-	HLA-DR+/CD7-			IFNa2	D07942	F	Cyno		eventCount	278
R2W7_D07942_Cy_F_IFNa2.fcs	CD16+/CD11b-	CD16+/CD11b-	HLA-DR+/CD7-			IFNa2	D07942	F	Cyno	HLA-DR+/CD7-	percent	6.800391389432486
R2W7_D07942_Cy_F_IFNa2.fcs	CD16+/CD11b+	CD16+/CD11b+	HLA-DR+/CD7-			IFNa2	D07942	F	Cyno		eventCount	304
R2W7_D07942_Cy_F_IFNa2.fcs	CD16+/CD11b+	CD16+/CD11b+	HLA-DR+/CD7-			IFNa2	D07942	F	Cyno	HLA-DR+/CD7-	percent	7.436399217221135
R2W7_D07942_Cy_F_IFNa2.fcs	Neutrophils	Neutrophils	Non-Basophils			IFNa2	D07942	F	Cyno		eventCount	39439
R2W7_D07942_Cy_F_IFNa2.fcs	Neutrophils	Neutrophils	Non-Basophils			IFNa2	D07942	F	Cyno	Non-Basophils	percent	19.956180298338293
R2W7_D07942_Cy_F_IFNa2.fcs	CD8+T cells	CD8+T cells	T Cells			IFNa2	D07942	F	Cyno		eventCount	43862
R2W7_D07942_Cy_F_IFNa2.fcs	CD8+T cells	CD8+T cells	T Cells			IFNa2	D07942	F	Cyno	T Cells	percent	52.84259984338293
R2W7_D07942_Cy_F_IFNa2.fcs	CD4+T cells	CD4+T cells	T Cells			IFNa2	D07942	F	Cyno		eventCount	29383
R2W7_D07942_Cy_F_IFNa2.fcs	CD4+T cells	CD4+T cells	T Cells			IFNa2	D07942	F	Cyno	T Cells	percent	35.39907234503946
R2W7_D07942_Cy_F_IFNa2.fcs	CD4+/CD8+	CD4+/CD8+	T Cells			IFNa2	D07942	F	Cyno		eventCount	6468
R2W7_D07942_Cy_F_IFNa2.fcs	CD4+/CD8+	CD4+/CD8+	T Cells			IFNa2	D07942	F	Cyno	T Cells	percent	7.792301668574182
R2W7_D07942_Cy_F_GM-CSF.fcs	Basophils	Basophils	Singlets			GM-CSF	D07942	F	Cyno		eventCount	85
R2W7_D07942_Cy_F_GM-CSF.fcs	Basophils	Basophils	Singlets			GM-CSF	D07942	F	Cyno	Singlets	percent	0.041669526340042944
R2W7_D07942_Cy_F_GM-CSF.fcs	B Cells	B Cells	CD45+ CD66-			GM-CSF	D07942	F	Cyno		eventCount	12071
R2W7_D07942_Cy_F_GM-CSF.fcs	B Cells	B Cells	CD45+ CD66-			GM-CSF	D07942	F	Cyno	CD45+ CD66-	percent	8.455568164306028
R2W7_D07942_Cy_F_GM-CSF.fcs	CD1c+ B cells	CD1c+ B cells	B Cells			GM-CSF	D07942	F	Cyno		eventCount	1075
R2W7_D07942_Cy_F_GM-CSF.fcs	CD1c+ B cells	CD1c+ B cells	B Cells			GM-CSF	D07942	F	Cyno	B Cells	percent	8.90564162041256
R2W7_D07942_Cy_F_GM-CSF.fcs	CD7+/HLA-DR-	CD7+/HLA-DR-	CD19- CD3-			GM-CSF	D07942	F	Cyno		eventCount	9713
R2W7_D07942_Cy_F_GM-CSF.fcs	CD7+/HLA-DR-	CD7+/HLA-DR-	CD19- CD3-			GM-CSF	D07942	F	Cyno	CD19- CD3-	percent	30.182405767378267
R2W7_D07942_Cy_F_GM-CSF.fcs	pDCs	pDCs	HLA-DR+ CD11c-			GM-CSF	D07942	F	Cyno		eventCount	11
R2W7_D07942_Cy_F_GM-CSF.fcs	pDCs	pDCs	HLA-DR+ CD11c-			GM-CSF	D07942	F	Cyno	HLA-DR+ CD11c-	percent	0.3387742531567601
R2W7_D07942_Cy_F_GM-CSF.fcs	CD11b-/CD16-	CD11b-/CD16-	HLA-DR+/CD7-			GM-CSF	D07942	F	Cyno		eventCount	1794
R2W7_D07942_Cy_F_GM-CSF.fcs	CD11b-/CD16-	CD11b-/CD16-	HLA-DR+/CD7-			GM-CSF	D07942	F	Cyno	HLA-DR+/CD7-	percent	43.54368932038835
R2W7_D07942_Cy_F_GM-CSF.fcs	CD11b+/CD16-	CD11b+/CD16-	HLA-DR+/CD7-			GM-CSF	D07942	F	Cyno		eventCount	1782
R2W7_D07942_Cy_F_GM-CSF.fcs	CD11b+/CD16-	CD11b+/CD16-	HLA-DR+/CD7-			GM-CSF	D07942	F	Cyno	HLA-DR+/CD7-	percent	43.25242718446602
R2W7_D07942_Cy_F_GM-CSF.fcs	CD16+/CD11b-	CD16+/CD11b-	HLA-DR+/CD7-			GM-CSF	D07942	F	Cyno		eventCount	243
R2W7_D07942_Cy_F_GM-CSF.fcs	CD16+/CD11b-	CD16+/CD11b-	HLA-DR+/CD7-			GM-CSF	D07942	F	Cyno	HLA-DR+/CD7-	percent	5.898058252427185
R2W7_D07942_Cy_F_GM-CSF.fcs	CD16+/CD11b+	CD16+/CD11b+	HLA-DR+/CD7-			GM-CSF	D07942	F	Cyno		eventCount	271
R2W7_D07942_Cy_F_GM-CSF.fcs	CD16+/CD11b+	CD16+/CD11b+	HLA-DR+/CD7-			GM-CSF	D07942	F	Cyno	HLA-DR+/CD7-	percent	6.577669902912621
R2W7_D07942_Cy_F_GM-CSF.fcs	Neutrophils	Neutrophils	Non-Basophils			GM-CSF	D07942	F	Cyno		eventCount	39882
R2W7_D07942_Cy_F_GM-CSF.fcs	Neutrophils	Neutrophils	Non-Basophils			GM-CSF	D07942	F	Cyno	Non-Basophils	percent	19.561890560929193
R2W7_D07942_Cy_F_GM-CSF.fcs	CD8+T cells	CD8+T cells	T Cells			GM-CSF	D07942	F	Cyno		eventCount	46007
R2W7_D07942_Cy_F_GM-CSF.fcs	CD8+T cells	CD8+T cells	T Cells			GM-CSF	D07942	F	Cyno	T Cells	percent	53.19958371877891
R2W7_D07942_Cy_F_GM-CSF.fcs	CD4+T cells	CD4+T cells	T Cells			GM-CSF	D07942	F	Cyno		eventCount	30414
R2W7_D07942_Cy_F_GM-CSF.fcs	CD4+T cells	CD4+T cells	T Cells			GM-CSF	D07942	F	Cyno	T Cells	percent	35.16882516188714
R2W7_D07942_Cy_F_GM-CSF.fcs	CD4+/CD8+	CD4+/CD8+	T Cells			GM-CSF	D07942	F	Cyno		eventCount	6645
R2W7_D07942_Cy_F_GM-CSF.fcs	CD4+/CD8+	CD4+/CD8+	T Cells			GM-CSF	D07942	F	Cyno	T Cells	percent	7.683857539315449
R2W7_D07942_Cy_F_Ebola VLPs.fcs	Basophils	Basophils	Singlets			Ebola VLPs	D07942	F	Cyno		eventCount	115
R2W7_D07942_Cy_F_Ebola VLPs.fcs	Basophils	Basophils	Singlets			Ebola VLPs	D07942	F	Cyno	Singlets	percent	0.0467960951710499
R2W7_D07942_Cy_F_Ebola VLPs.fcs	B Cells	B Cells	CD45+ CD66-			Ebola VLPs	D07942	F	Cyno		eventCount	13879
R2W7_D07942_Cy_F_Ebola VLPs.fcs	B Cells	B Cells	CD45+ CD66-			Ebola VLPs	D07942	F	Cyno	CD45+ CD66-	percent	8.096629855848603
R2W7_D07942_Cy_F_Ebola VLPs.fcs	CD1c+ B cells	CD1c+ B cells	B Cells			Ebola VLPs	D07942	F	Cyno		eventCount	1048
R2W7_D07942_Cy_F_Ebola VLPs.fcs	CD1c+ B cells	CD1c+ B cells	B Cells			Ebola VLPs	D07942	F	Cyno	B Cells	percent	7.550976295122127
R2W7_D07942_Cy_F_Ebola VLPs.fcs	CD7+/HLA-DR-	CD7+/HLA-DR-	CD19- CD3-			Ebola VLPs	D07942	F	Cyno		eventCount	11469
R2W7_D07942_Cy_F_Ebola VLPs.fcs	CD7+/HLA-DR-	CD7+/HLA-DR-	CD19- CD3-			Ebola VLPs	D07942	F	Cyno	CD19- CD3-	percent	28.80210949271723
R2W7_D07942_Cy_F_Ebola VLPs.fcs	pDCs	pDCs	HLA-DR+ CD11c-			Ebola VLPs	D07942	F	Cyno		eventCount	15
R2W7_D07942_Cy_F_Ebola VLPs.fcs	pDCs	pDCs	HLA-DR+ CD11c-			Ebola VLPs	D07942	F	Cyno	HLA-DR+ CD11c-	percent	0.40398599515216804
R2W7_D07942_Cy_F_Ebola VLPs.fcs	CD11b-/CD16-	CD11b-/CD16-	HLA-DR+/CD7-			Ebola VLPs	D07942	F	Cyno		eventCount	1969
R2W7_D07942_Cy_F_Ebola VLPs.fcs	CD11b-/CD16-	CD11b-/CD16-	HLA-DR+/CD7-			Ebola VLPs	D07942	F	Cyno	HLA-DR+/CD7-	percent	41.76033934252386
R2W7_D07942_Cy_F_Ebola VLPs.fcs	CD11b+/CD16-	CD11b+/CD16-	HLA-DR+/CD7-			Ebola VLPs	D07942	F	Cyno		eventCount	2122
R2W7_D07942_Cy_F_Ebola VLPs.fcs	CD11b+/CD16-	CD11b+/CD16-	HLA-DR+/CD7-			Ebola VLPs	D07942	F	Cyno	HLA-DR+/CD7-	percent	45.005302226935314
R2W7_D07942_Cy_F_Ebola VLPs.fcs	CD16+/CD11b-	CD16+/CD11b-	HLA-DR+/CD7-			Ebola VLPs	D07942	F	Cyno		eventCount	281
R2W7_D07942_Cy_F_Ebola VLPs.fcs	CD16+/CD11b-	CD16+/CD11b-	HLA-DR+/CD7-			Ebola VLPs	D07942	F	Cyno	HLA-DR+/CD7-	percent	5.959703075291623
R2W7_D07942_Cy_F_Ebola VLPs.fcs	CD16+/CD11b+	CD16+/CD11b+	HLA-DR+/CD7-			Ebola VLPs	D07942	F	Cyno		eventCount	300
R2W7_D07942_Cy_F_Ebola VLPs.fcs	CD16+/CD11b+	CD16+/CD11b+	HLA-DR+/CD7-			Ebola VLPs	D07942	F	Cyno	HLA-DR+/CD7-	percent	6.362672322375397
R2W7_D07942_Cy_F_Ebola VLPs.fcs	Neutrophils	Neutrophils	Non-Basophils			Ebola VLPs	D07942	F	Cyno		eventCount	49107
R2W7_D07942_Cy_F_Ebola VLPs.fcs	Neutrophils	Neutrophils	Non-Basophils			Ebola VLPs	D07942	F	Cyno	Non-Basophils	percent	19.996172357908968
R2W7_D07942_Cy_F_Ebola VLPs.fcs	CD8+T cells	CD8+T cells	T Cells			Ebola VLPs	D07942	F	Cyno		eventCount	53783
R2W7_D07942_Cy_F_Ebola VLPs.fcs	CD8+T cells	CD8+T cells	T Cells			Ebola VLPs	D07942	F	Cyno	T Cells	percent	52.44717056569183
R2W7_D07942_Cy_F_Ebola VLPs.fcs	CD4+T cells	CD4+T cells	T Cells			Ebola VLPs	D07942	F	Cyno		eventCount	36930
R2W7_D07942_Cy_F_Ebola VLPs.fcs	CD4+T cells	CD4+T cells	T Cells			Ebola VLPs	D07942	F	Cyno	T Cells	percent	36.01275512691741
R2W7_D07942_Cy_F_Ebola VLPs.fcs	CD4+/CD8+	CD4+/CD8+	T Cells			Ebola VLPs	D07942	F	Cyno		eventCount	7762
R2W7_D07942_Cy_F_Ebola VLPs.fcs	CD4+/CD8+	CD4+/CD8+	T Cells			Ebola VLPs	D07942	F	Cyno	T Cells	percent	7.569212166128702
R2W7_D07942_Cy_F_CD40L.fcs	Basophils	Basophils	Singlets			CD40L	D07942	F	Cyno		eventCount	145
R2W7_D07942_Cy_F_CD40L.fcs	Basophils	Basophils	Singlets			CD40L	D07942	F	Cyno	Singlets	percent	0.055553852755471096
R2W7_D07942_Cy_F_CD40L.fcs	B Cells	B Cells	CD45+ CD66-			CD40L	D07942	F	Cyno		eventCount	14466
R2W7_D07942_Cy_F_CD40L.fcs	B Cells	B Cells	CD45+ CD66-			CD40L	D07942	F	Cyno	CD45+ CD66-	percent	8.112655203741713
R2W7_D07942_Cy_F_CD40L.fcs	CD1c+ B cells	CD1c+ B cells	B Cells			CD40L	D07942	F	Cyno		eventCount	1250
R2W7_D07942_Cy_F_CD40L.fcs	CD1c+ B cells	CD1c+ B cells	B Cells			CD40L	D07942	F	Cyno	B Cells	percent	8.640951195907645
R2W7_D07942_Cy_F_CD40L.fcs	CD7+/HLA-DR-	CD7+/HLA-DR-	CD19- CD3-			CD40L	D07942	F	Cyno		eventCount	13589
R2W7_D07942_Cy_F_CD40L.fcs	CD7+/HLA-DR-	CD7+/HLA-DR-	CD19- CD3-			CD40L	D07942	F	Cyno	CD19- CD3-	percent	32.63683742824891
R2W7_D07942_Cy_F_CD40L.fcs	pDCs	pDCs	HLA-DR+ CD11c-			CD40L	D07942	F	Cyno		eventCount	13
R2W7_D07942_Cy_F_CD40L.fcs	pDCs	pDCs	HLA-DR+ CD11c-			CD40L	D07942	F	Cyno	HLA-DR+ CD11c-	percent	0.3238664673642252
R2W7_D07942_Cy_F_CD40L.fcs	CD11b-/CD16-	CD11b-/CD16-	HLA-DR+/CD7-			CD40L	D07942	F	Cyno		eventCount	2328
R2W7_D07942_Cy_F_CD40L.fcs	CD11b-/CD16-	CD11b-/CD16-	HLA-DR+/CD7-			CD40L	D07942	F	Cyno	HLA-DR+/CD7-	percent	45.664966653589644
R2W7_D07942_Cy_F_CD40L.fcs	CD11b+/CD16-	CD11b+/CD16-	HLA-DR+/CD7-			CD40L	D07942	F	Cyno		eventCount	2120
R2W7_D07942_Cy_F_CD40L.fcs	CD11b+/CD16-	CD11b+/CD16-	HLA-DR+/CD7-			CD40L	D07942	F	Cyno	HLA-DR+/CD7-	percent	41.584935268732835
R2W7_D07942_Cy_F_CD40L.fcs	CD16+/CD11b-	CD16+/CD11b-	HLA-DR+/CD7-			CD40L	D07942	F	Cyno		eventCount	311
R2W7_D07942_Cy_F_CD40L.fcs	CD16+/CD11b-	CD16+/CD11b-	HLA-DR+/CD7-			CD40L	D07942	F	Cyno	HLA-DR+/CD7-	percent	6.100431541781091
R2W7_D07942_Cy_F_CD40L.fcs	CD16+/CD11b+	CD16+/CD11b+	HLA-DR+/CD7-			CD40L	D07942	F	Cyno		eventCount	289
R2W7_D07942_Cy_F_CD40L.fcs	CD16+/CD11b+	CD16+/CD11b+	HLA-DR+/CD7-			CD40L	D07942	F	Cyno	HLA-DR+/CD7-	percent	5.668889760690467
R2W7_D07942_Cy_F_CD40L.fcs	Neutrophils	Neutrophils	Non-Basophils			CD40L	D07942	F	Cyno		eventCount	52986
R2W7_D07942_Cy_F_CD40L.fcs	Neutrophils	Neutrophils	Non-Basophils			CD40L	D07942	F	Cyno	Non-Basophils	percent	20.31578301611889
R2W7_D07942_Cy_F_CD40L.fcs	CD8+T cells	CD8+T cells	T Cells			CD40L	D07942	F	Cyno		eventCount	56112
R2W7_D07942_Cy_F_CD40L.fcs	CD8+T cells	CD8+T cells	T Cells			CD40L	D07942	F	Cyno	T Cells	percent	52.60878125615279
R2W7_D07942_Cy_F_CD40L.fcs	CD4+T cells	CD4+T cells	T Cells			CD40L	D07942	F	Cyno		eventCount	37691
R2W7_D07942_Cy_F_CD40L.fcs	CD4+T cells	CD4+T cells	T Cells			CD40L	D07942	F	Cyno	T Cells	percent	35.337852408141835
R2W7_D07942_Cy_F_CD40L.fcs	CD4+/CD8+	CD4+/CD8+	T Cells			CD40L	D07942	F	Cyno		eventCount	8509
R2W7_D07942_Cy_F_CD40L.fcs	CD4+/CD8+	CD4+/CD8+	T Cells			CD40L	D07942	F	Cyno	T Cells	percent	7.9777609015648
R2W7_D07942_Cy_F_Basal.fcs	Basophils	Basophils	Singlets			Basal	D07942	F	Cyno		eventCount	76
R2W7_D07942_Cy_F_Basal.fcs	Basophils	Basophils	Singlets			Basal	D07942	F	Cyno	Singlets	percent	0.03710901260729876
R2W7_D07942_Cy_F_Basal.fcs	B Cells	B Cells	CD45+ CD66-			Basal	D07942	F	Cyno		eventCount	11786
R2W7_D07942_Cy_F_Basal.fcs	B Cells	B Cells	CD45+ CD66-			Basal	D07942	F	Cyno	CD45+ CD66-	percent	8.22309667336459
R2W7_D07942_Cy_F_Basal.fcs	CD1c+ B cells	CD1c+ B cells	B Cells			Basal	D07942	F	Cyno		eventCount	1243
R2W7_D07942_Cy_F_Basal.fcs	CD1c+ B cells	CD1c+ B cells	B Cells			Basal	D07942	F	Cyno	B Cells	percent	10.546410996097064
R2W7_D07942_Cy_F_Basal.fcs	CD7+/HLA-DR-	CD7+/HLA-DR-	CD19- CD3-			Basal	D07942	F	Cyno		eventCount	9559
R2W7_D07942_Cy_F_Basal.fcs	CD7+/HLA-DR-	CD7+/HLA-DR-	CD19- CD3-			Basal	D07942	F	Cyno	CD19- CD3-	percent	29.434043601428748
R2W7_D07942_Cy_F_Basal.fcs	pDCs	pDCs	HLA-DR+ CD11c-			Basal	D07942	F	Cyno		eventCount	17
R2W7_D07942_Cy_F_Basal.fcs	pDCs	pDCs	HLA-DR+ CD11c-			Basal	D07942	F	Cyno	HLA-DR+ CD11c-	percent	0.5213124808341
R2W7_D07942_Cy_F_Basal.fcs	CD11b-/CD16-	CD11b-/CD16-	HLA-DR+/CD7-			Basal	D07942	F	Cyno		eventCount	1854
R2W7_D07942_Cy_F_Basal.fcs	CD11b-/CD16-	CD11b-/CD16-	HLA-DR+/CD7-			Basal	D07942	F	Cyno	HLA-DR+/CD7-	percent	44.92367337048704
R2W7_D07942_Cy_F_Basal.fcs	CD11b+/CD16-	CD11b+/CD16-	HLA-DR+/CD7-			Basal	D07942	F	Cyno		eventCount	1700
R2W7_D07942_Cy_F_Basal.fcs	CD11b+/CD16-	CD11b+/CD16-	HLA-DR+/CD7-			Basal	D07942	F	Cyno	HLA-DR+/CD7-	percent	41.19214926096438
R2W7_D07942_Cy_F_Basal.fcs	CD16+/CD11b-	CD16+/CD11b-	HLA-DR+/CD7-			Basal	D07942	F	Cyno		eventCount	250
R2W7_D07942_Cy_F_Basal.fcs	CD16+/CD11b-	CD16+/CD11b-	HLA-DR+/CD7-			Basal	D07942	F	Cyno	HLA-DR+/CD7-	percent	6.05766900896535
R2W7_D07942_Cy_F_Basal.fcs	CD16+/CD11b+	CD16+/CD11b+	HLA-DR+/CD7-			Basal	D07942	F	Cyno		eventCount	285
R2W7_D07942_Cy_F_Basal.fcs	CD16+/CD11b+	CD16+/CD11b+	HLA-DR+/CD7-			Basal	D07942	F	Cyno	HLA-DR+/CD7-	percent	6.9057426702205
R2W7_D07942_Cy_F_Basal.fcs	Neutrophils	Neutrophils	Non-Basophils			Basal	D07942	F	Cyno		eventCount	40447
R2W7_D07942_Cy_F_Basal.fcs	Neutrophils	Neutrophils	Non-Basophils			Basal	D07942	F	Cyno	Non-Basophils	percent	19.758966693046478
R2W7_D07942_Cy_F_Basal.fcs	CD8+T cells	CD8+T cells	T Cells			Basal	D07942	F	Cyno		eventCount	45766
R2W7_D07942_Cy_F_Basal.fcs	CD8+T cells	CD8+T cells	T Cells			Basal	D07942	F	Cyno	T Cells	percent	52.90255461796324
R2W7_D07942_Cy_F_Basal.fcs	CD4+T cells	CD4+T cells	T Cells			Basal	D07942	F	Cyno		eventCount	30696
R2W7_D07942_Cy_F_Basal.fcs	CD4+T cells	CD4+T cells	T Cells			Basal	D07942	F	Cyno	T Cells	percent	35.4826031672639
R2W7_D07942_Cy_F_Basal.fcs	CD4+/CD8+	CD4+/CD8+	T Cells			Basal	D07942	F	Cyno		eventCount	6488
R2W7_D07942_Cy_F_Basal.fcs	CD4+/CD8+	CD4+/CD8+	T Cells			Basal	D07942	F	Cyno	T Cells	percent	7.499711016067507
R2W7_D07942_Cy_F_Anthrax.fcs	Basophils	Basophils	Singlets			Anthrax	D07942	F	Cyno		eventCount	153
R2W7_D07942_Cy_F_Anthrax.fcs	Basophils	Basophils	Singlets			Anthrax	D07942	F	Cyno	Singlets	percent	0.05893569076096377
R2W7_D07942_Cy_F_Anthrax.fcs	B Cells	B Cells	CD45+ CD66-			Anthrax	D07942	F	Cyno		eventCount	14029
R2W7_D07942_Cy_F_Anthrax.fcs	B Cells	B Cells	CD45+ CD66-			Anthrax	D07942	F	Cyno	CD45+ CD66-	percent	7.99537227009529
R2W7_D07942_Cy_F_Anthrax.fcs	CD1c+ B cells	CD1c+ B cells	B Cells			Anthrax	D07942	F	Cyno		eventCount	1245
R2W7_D07942_Cy_F_Anthrax.fcs	CD1c+ B cells	CD1c+ B cells	B Cells			Anthrax	D07942	F	Cyno	B Cells	percent	8.874474303229025
R2W7_D07942_Cy_F_Anthrax.fcs	CD7+/HLA-DR-	CD7+/HLA-DR-	CD19- CD3-			Anthrax	D07942	F	Cyno		eventCount	15268
R2W7_D07942_Cy_F_Anthrax.fcs	CD7+/HLA-DR-	CD7+/HLA-DR-	CD19- CD3-			Anthrax	D07942	F	Cyno	CD19- CD3-	percent	35.419663155941166
R2W7_D07942_Cy_F_Anthrax.fcs	pDCs	pDCs	HLA-DR+ CD11c-			Anthrax	D07942	F	Cyno		eventCount	13
R2W7_D07942_Cy_F_Anthrax.fcs	pDCs	pDCs	HLA-DR+ CD11c-			Anthrax	D07942	F	Cyno	HLA-DR+ CD11c-	percent	0.31784841075794623
R2W7_D07942_Cy_F_Anthrax.fcs	CD11b-/CD16-	CD11b-/CD16-	HLA-DR+/CD7-			Anthrax	D07942	F	Cyno		eventCount	2382
R2W7_D07942_Cy_F_Anthrax.fcs	CD11b-/CD16-	CD11b-/CD16-	HLA-DR+/CD7-			Anthrax	D07942	F	Cyno	HLA-DR+/CD7-	percent	45.345516847515704
R2W7_D07942_Cy_F_Anthrax.fcs	CD11b+/CD16-	CD11b+/CD16-	HLA-DR+/CD7-			Anthrax	D07942	F	Cyno		eventCount	2195
R2W7_D07942_Cy_F_Anthrax.fcs	CD11b+/CD16-	CD11b+/CD16-	HLA-DR+/CD7-			Anthrax	D07942	F	Cyno	HLA-DR+/CD7-	percent	41.78564629735389
R2W7_D07942_Cy_F_Anthrax.fcs	CD16+/CD11b-	CD16+/CD11b-	HLA-DR+/CD7-			Anthrax	D07942	F	Cyno		eventCount	323
R2W7_D07942_Cy_F_Anthrax.fcs	CD16+/CD11b-	CD16+/CD11b-	HLA-DR+/CD7-			Anthrax	D07942	F	Cyno	HLA-DR+/CD7-	percent	6.148867313915858
R2W7_D07942_Cy_F_Anthrax.fcs	CD16+/CD11b+	CD16+/CD11b+	HLA-DR+/CD7-			Anthrax	D07942	F	Cyno		eventCount	296
R2W7_D07942_Cy_F_Anthrax.fcs	CD16+/CD11b+	CD16+/CD11b+	HLA-DR+/CD7-			Anthrax	D07942	F	Cyno	HLA-DR+/CD7-	percent	5.63487530934704
R2W7_D07942_Cy_F_Anthrax.fcs	Neutrophils	Neutrophils	Non-Basophils			Anthrax	D07942	F	Cyno		eventCount	53254
R2W7_D07942_Cy_F_Anthrax.fcs	Neutrophils	Neutrophils	Non-Basophils			Anthrax	D07942	F	Cyno	Non-Basophils	percent	20.52952560119043
R2W7_D07942_Cy_F_Anthrax.fcs	CD8+T cells	CD8+T cells	T Cells			Anthrax	D07942	F	Cyno		eventCount	54396
R2W7_D07942_Cy_F_Anthrax.fcs	CD8+T cells	CD8+T cells	T Cells			Anthrax	D07942	F	Cyno	T Cells	percent	52.692452994681936
R2W7_D07942_Cy_F_Anthrax.fcs	CD4+T cells	CD4+T cells	T Cells			Anthrax	D07942	F	Cyno		eventCount	35627
R2W7_D07942_Cy_F_Anthrax.fcs	CD4+T cells	CD4+T cells	T Cells			Anthrax	D07942	F	Cyno	T Cells	percent	34.51125124717871
R2W7_D07942_Cy_F_Anthrax.fcs	CD4+/CD8+	CD4+/CD8+	T Cells			Anthrax	D07942	F	Cyno		eventCount	8841
R2W7_D07942_Cy_F_Anthrax.fcs	CD4+/CD8+	CD4+/CD8+	T Cells			Anthrax	D07942	F	Cyno	T Cells	percent	8.564121937752462
R2W9_D09361_Rh_F_TNFa.fcs	Basophils	Basophils	Singlets			TNFa	D09361	F	Rhesus		eventCount	147
R2W9_D09361_Rh_F_TNFa.fcs	Basophils	Basophils	Singlets			TNFa	D09361	F	Rhesus	Singlets	percent	0.12139329776867558
R2W9_D09361_Rh_F_TNFa.fcs	B Cells	B Cells	CD45+ CD66-			TNFa	D09361	F	Rhesus		eventCount	5040
R2W9_D09361_Rh_F_TNFa.fcs	B Cells	B Cells	CD45+ CD66-			TNFa	D09361	F	Rhesus	CD45+ CD66-	percent	6.393099511638232
R2W9_D09361_Rh_F_TNFa.fcs	CD1c+ B cells	CD1c+ B cells	B Cells			TNFa	D09361	F	Rhesus		eventCount	223
R2W9_D09361_Rh_F_TNFa.fcs	CD1c+ B cells	CD1c+ B cells	B Cells			TNFa	D09361	F	Rhesus	B Cells	percent	4.424603174603175
R2W9_D09361_Rh_F_TNFa.fcs	CD7+/HLA-DR-	CD7+/HLA-DR-	CD19- CD3-			TNFa	D09361	F	Rhesus		eventCount	9596
R2W9_D09361_Rh_F_TNFa.fcs	CD7+/HLA-DR-	CD7+/HLA-DR-	CD19- CD3-			TNFa	D09361	F	Rhesus	CD19- CD3-	percent	65.43470848960109
R2W9_D09361_Rh_F_TNFa.fcs	pDCs	pDCs	HLA-DR+ CD11c-			TNFa	D09361	F	Rhesus		eventCount	35
R2W9_D09361_Rh_F_TNFa.fcs	pDCs	pDCs	HLA-DR+ CD11c-			TNFa	D09361	F	Rhesus	HLA-DR+ CD11c-	percent	3.004291845493562
R2W9_D09361_Rh_F_TNFa.fcs	CD11b-/CD16-	CD11b-/CD16-	HLA-DR+/CD7-			TNFa	D09361	F	Rhesus		eventCount	430
R2W9_D09361_Rh_F_TNFa.fcs	CD11b-/CD16-	CD11b-/CD16-	HLA-DR+/CD7-			TNFa	D09361	F	Rhesus	HLA-DR+/CD7-	percent	14.280969777482564
R2W9_D09361_Rh_F_TNFa.fcs	CD11b+/CD16-	CD11b+/CD16-	HLA-DR+/CD7-			TNFa	D09361	F	Rhesus		eventCount	1198
R2W9_D09361_Rh_F_TNFa.fcs	CD11b+/CD16-	CD11b+/CD16-	HLA-DR+/CD7-			TNFa	D09361	F	Rhesus	HLA-DR+/CD7-	percent	39.78744603121886
R2W9_D09361_Rh_F_TNFa.fcs	CD16+/CD11b-	CD16+/CD11b-	HLA-DR+/CD7-			TNFa	D09361	F	Rhesus		eventCount	999
R2W9_D09361_Rh_F_TNFa.fcs	CD16+/CD11b-	CD16+/CD11b-	HLA-DR+/CD7-			TNFa	D09361	F	Rhesus	HLA-DR+/CD7-	percent	33.17834606443042
R2W9_D09361_Rh_F_TNFa.fcs	CD16+/CD11b+	CD16+/CD11b+	HLA-DR+/CD7-			TNFa	D09361	F	Rhesus		eventCount	360
R2W9_D09361_Rh_F_TNFa.fcs	CD16+/CD11b+	CD16+/CD11b+	HLA-DR+/CD7-			TNFa	D09361	F	Rhesus	HLA-DR+/CD7-	percent	11.956160743938891
R2W9_D09361_Rh_F_TNFa.fcs	Neutrophils	Neutrophils	Non-Basophils			TNFa	D09361	F	Rhesus		eventCount	27816
R2W9_D09361_Rh_F_TNFa.fcs	Neutrophils	Neutrophils	Non-Basophils			TNFa	D09361	F	Rhesus	Non-Basophils	percent	23.00668298815589
R2W9_D09361_Rh_F_TNFa.fcs	CD8+T cells	CD8+T cells	T Cells			TNFa	D09361	F	Rhesus		eventCount	24015
R2W9_D09361_Rh_F_TNFa.fcs	CD8+T cells	CD8+T cells	T Cells			TNFa	D09361	F	Rhesus	T Cells	percent	41.666666666666664
R2W9_D09361_Rh_F_TNFa.fcs	CD4+T cells	CD4+T cells	T Cells			TNFa	D09361	F	Rhesus		eventCount	18677
R2W9_D09361_Rh_F_TNFa.fcs	CD4+T cells	CD4+T cells	T Cells			TNFa	D09361	F	Rhesus	T Cells	percent	32.40509403844819
R2W9_D09361_Rh_F_TNFa.fcs	CD4+/CD8+	CD4+/CD8+	T Cells			TNFa	D09361	F	Rhesus		eventCount	11741
R2W9_D09361_Rh_F_TNFa.fcs	CD4+/CD8+	CD4+/CD8+	T Cells			TNFa	D09361	F	Rhesus	T Cells	percent	20.370948712610176
R2W9_D09361_Rh_F_R848.fcs	Basophils	Basophils	Singlets			R848	D09361	F	Rhesus		eventCount	131
R2W9_D09361_Rh_F_R848.fcs	Basophils	Basophils	Singlets			R848	D09361	F	Rhesus	Singlets	percent	0.09765333810418345
R2W9_D09361_Rh_F_R848.fcs	B Cells	B Cells	CD45+ CD66-			R848	D09361	F	Rhesus		eventCount	4813
R2W9_D09361_Rh_F_R848.fcs	B Cells	B Cells	CD45+ CD66-			R848	D09361	F	Rhesus	CD45+ CD66-	percent	5.843430541728383
R2W9_D09361_Rh_F_R848.fcs	CD1c+ B cells	CD1c+ B cells	B Cells			R848	D09361	F	Rhesus		eventCount	57
R2W9_D09361_Rh_F_R848.fcs	CD1c+ B cells	CD1c+ B cells	B Cells			R848	D09361	F	Rhesus	B Cells	percent	1.1842925410346976
R2W9_D09361_Rh_F_R848.fcs	CD7+/HLA-DR-	CD7+/HLA-DR-	CD19- CD3-			R848	D09361	F	Rhesus		eventCount	9916
R2W9_D09361_Rh_F_R848.fcs	CD7+/HLA-DR-	CD7+/HLA-DR-	CD19- CD3-			R848	D09361	F	Rhesus	CD19- CD3-	percent	68.30612385479094
R2W9_D09361_Rh_F_R848.fcs	pDCs	pDCs	HLA-DR+ CD11c-			R848	D09361	F	Rhesus		eventCount	24
R2W9_D09361_Rh_F_R848.fcs	pDCs	pDCs	HLA-DR+ CD11c-			R848	D09361	F	Rhesus	HLA-DR+ CD11c-	percent	2.742857142857143
R2W9_D09361_Rh_F_R848.fcs	CD11b-/CD16-	CD11b-/CD16-	HLA-DR+/CD7-			R848	D09361	F	Rhesus		eventCount	345
R2W9_D09361_Rh_F_R848.fcs	CD11b-/CD16-	CD11b-/CD16-	HLA-DR+/CD7-			R848	D09361	F	Rhesus	HLA-DR+/CD7-	percent	12.509064539521392
R2W9_D09361_Rh_F_R848.fcs	CD11b+/CD16-	CD11b+/CD16-	HLA-DR+/CD7-			R848	D09361	F	Rhesus		eventCount	1104
R2W9_D09361_Rh_F_R848.fcs	CD11b+/CD16-	CD11b+/CD16-	HLA-DR+/CD7-			R848	D09361	F	Rhesus	HLA-DR+/CD7-	percent	40.02900652646846
R2W9_D09361_Rh_F_R848.fcs	CD16+/CD11b-	CD16+/CD11b-	HLA-DR+/CD7-			R848	D09361	F	Rhesus		eventCount	986
R2W9_D09361_Rh_F_R848.fcs	CD16+/CD11b-	CD16+/CD11b-	HLA-DR+/CD7-			R848	D09361	F	Rhesus	HLA-DR+/CD7-	percent	35.75054387237128
R2W9_D09361_Rh_F_R848.fcs	CD16+/CD11b+	CD16+/CD11b+	HLA-DR+/CD7-			R848	D09361	F	Rhesus		eventCount	301
R2W9_D09361_Rh_F_R848.fcs	CD16+/CD11b+	CD16+/CD11b+	HLA-DR+/CD7-			R848	D09361	F	Rhesus	HLA-DR+/CD7-	percent	10.913705583756345
R2W9_D09361_Rh_F_R848.fcs	Neutrophils	Neutrophils	Non-Basophils			R848	D09361	F	Rhesus		eventCount	31421
R2W9_D09361_Rh_F_R848.fcs	Neutrophils	Neutrophils	Non-Basophils			R848	D09361	F	Rhesus	Non-Basophils	percent	23.461288612453053
R2W9_D09361_Rh_F_R848.fcs	CD8+T cells	CD8+T cells	T Cells			R848	D09361	F	Rhesus		eventCount	24341
R2W9_D09361_Rh_F_R848.fcs	CD8+T cells	CD8+T cells	T Cells			R848	D09361	F	Rhesus	T Cells	percent	39.95830323724473
R2W9_D09361_Rh_F_R848.fcs	CD4+T cells	CD4+T cells	T Cells			R848	D09361	F	Rhesus		eventCount	19480
R2W9_D09361_Rh_F_R848.fcs	CD4+T cells	CD4+T cells	T Cells			R848	D09361	F	Rhesus	T Cells	percent	31.978462144592555
R2W9_D09361_Rh_F_R848.fcs	CD4+/CD8+	CD4+/CD8+	T Cells			R848	D09361	F	Rhesus		eventCount	13380
R2W9_D09361_Rh_F_R848.fcs	CD4+/CD8+	CD4+/CD8+	T Cells			R848	D09361	F	Rhesus	T Cells	percent	21.96467266399632
R2W9_D09361_Rh_F_PMAIono.fcs	Basophils	Basophils	Singlets			PMAIono	D09361	F	Rhesus		eventCount	159
R2W9_D09361_Rh_F_PMAIono.fcs	Basophils	Basophils	Singlets			PMAIono	D09361	F	Rhesus	Singlets	percent	0.10618617976852748
R2W9_D09361_Rh_F_PMAIono.fcs	B Cells	B Cells	CD45+ CD66-			PMAIono	D09361	F	Rhesus		eventCount	4564
R2W9_D09361_Rh_F_PMAIono.fcs	B Cells	B Cells	CD45+ CD66-			PMAIono	D09361	F	Rhesus	CD45+ CD66-	percent	5.151590401155834
R2W9_D09361_Rh_F_PMAIono.fcs	CD1c+ B cells	CD1c+ B cells	B Cells			PMAIono	D09361	F	Rhesus		eventCount	107
R2W9_D09361_Rh_F_PMAIono.fcs	CD1c+ B cells	CD1c+ B cells	B Cells			PMAIono	D09361	F	Rhesus	B Cells	percent	2.3444347063978968
R2W9_D09361_Rh_F_PMAIono.fcs	CD7+/HLA-DR-	CD7+/HLA-DR-	CD19- CD3-			PMAIono	D09361	F	Rhesus		eventCount	14552
R2W9_D09361_Rh_F_PMAIono.fcs	CD7+/HLA-DR-	CD7+/HLA-DR-	CD19- CD3-			PMAIono	D09361	F	Rhesus	CD19- CD3-	percent	74.01831129196337
R2W9_D09361_Rh_F_PMAIono.fcs	pDCs	pDCs	HLA-DR+ CD11c-			PMAIono	D09361	F	Rhesus		eventCount	33
R2W9_D09361_Rh_F_PMAIono.fcs	pDCs	pDCs	HLA-DR+ CD11c-			PMAIono	D09361	F	Rhesus	HLA-DR+ CD11c-	percent	3.0136986301369864
R2W9_D09361_Rh_F_PMAIono.fcs	CD11b-/CD16-	CD11b-/CD16-	HLA-DR+/CD7-			PMAIono	D09361	F	Rhesus		eventCount	438
R2W9_D09361_Rh_F_PMAIono.fcs	CD11b-/CD16-	CD11b-/CD16-	HLA-DR+/CD7-			PMAIono	D09361	F	Rhesus	HLA-DR+/CD7-	percent	14.174757281553399
R2W9_D09361_Rh_F_PMAIono.fcs	CD11b+/CD16-	CD11b+/CD16-	HLA-DR+/CD7-			PMAIono	D09361	F	Rhesus		eventCount	1147
R2W9_D09361_Rh_F_PMAIono.fcs	CD11b+/CD16-	CD11b+/CD16-	HLA-DR+/CD7-			PMAIono	D09361	F	Rhesus	HLA-DR+/CD7-	percent	37.11974110032362
R2W9_D09361_Rh_F_PMAIono.fcs	CD16+/CD11b-	CD16+/CD11b-	HLA-DR+/CD7-			PMAIono	D09361	F	Rhesus		eventCount	1052
R2W9_D09361_Rh_F_PMAIono.fcs	CD16+/CD11b-	CD16+/CD11b-	HLA-DR+/CD7-			PMAIono	D09361	F	Rhesus	HLA-DR+/CD7-	percent	34.045307443365694
R2W9_D09361_Rh_F_PMAIono.fcs	CD16+/CD11b+	CD16+/CD11b+	HLA-DR+/CD7-			PMAIono	D09361	F	Rhesus		eventCount	425
R2W9_D09361_Rh_F_PMAIono.fcs	CD16+/CD11b+	CD16+/CD11b+	HLA-DR+/CD7-			PMAIono	D09361	F	Rhesus	HLA-DR+/CD7-	percent	13.754045307443366
R2W9_D09361_Rh_F_PMAIono.fcs	Neutrophils	Neutrophils	Non-Basophils			PMAIono	D09361	F	Rhesus		eventCount	30601
R2W9_D09361_Rh_F_PMAIono.fcs	Neutrophils	Neutrophils	Non-Basophils			PMAIono	D09361	F	Rhesus	Non-Basophils	percent	20.466979680832566
R2W9_D09361_Rh_F_PMAIono.fcs	CD8+T cells	CD8+T cells	T Cells			PMAIono	D09361	F	Rhesus		eventCount	25558
R2W9_D09361_Rh_F_PMAIono.fcs	CD8+T cells	CD8+T cells	T Cells			PMAIono	D09361	F	Rhesus	T Cells	percent	40.90850886740508
R2W9_D09361_Rh_F_PMAIono.fcs	CD4+T cells	CD4+T cells	T Cells			PMAIono	D09361	F	Rhesus		eventCount	20209
R2W9_D09361_Rh_F_PMAIono.fcs	CD4+T cells	CD4+T cells	T Cells			PMAIono	D09361	F	Rhesus	T Cells	percent	32.34682117933286
R2W9_D09361_Rh_F_PMAIono.fcs	CD4+/CD8+	CD4+/CD8+	T Cells			PMAIono	D09361	F	Rhesus		eventCount	13037
R2W9_D09361_Rh_F_PMAIono.fcs	CD4+/CD8+	CD4+/CD8+	T Cells			PMAIono	D09361	F	Rhesus	T Cells	percent	20.867213009795762
R2W9_D09361_Rh_F_LPS.fcs	Basophils	Basophils	Singlets			LPS	D09361	F	Rhesus		eventCount	130
R2W9_D09361_Rh_F_LPS.fcs	Basophils	Basophils	Singlets			LPS	D09361	F	Rhesus	Singlets	percent	0.11403008639971932
R2W9_D09361_Rh_F_LPS.fcs	B Cells	B Cells	CD45+ CD66-			LPS	D09361	F	Rhesus		eventCount	4443
R2W9_D09361_Rh_F_LPS.fcs	B Cells	B Cells	CD45+ CD66-			LPS	D09361	F	Rhesus	CD45+ CD66-	percent	6.289459528325925
R2W9_D09361_Rh_F_LPS.fcs	CD1c+ B cells	CD1c+ B cells	B Cells			LPS	D09361	F	Rhesus		eventCount	114
R2W9_D09361_Rh_F_LPS.fcs	CD1c+ B cells	CD1c+ B cells	B Cells			LPS	D09361	F	Rhesus	B Cells	percent	2.5658338960162053
R2W9_D09361_Rh_F_LPS.fcs	CD7+/HLA-DR-	CD7+/HLA-DR-	CD19- CD3-			LPS	D09361	F	Rhesus		eventCount	8960
R2W9_D09361_Rh_F_LPS.fcs	CD7+/HLA-DR-	CD7+/HLA-DR-	CD19- CD3-			LPS	D09361	F	Rhesus	CD19- CD3-	percent	66.11082417177009
R2W9_D09361_Rh_F_LPS.fcs	pDCs	pDCs	HLA-DR+ CD11c-			LPS	D09361	F	Rhesus		eventCount	26
R2W9_D09361_Rh_F_LPS.fcs	pDCs	pDCs	HLA-DR+ CD11c-			LPS	D09361	F	Rhesus	HLA-DR+ CD11c-	percent	2.6315789473684212
R2W9_D09361_Rh_F_LPS.fcs	CD11b-/CD16-	CD11b-/CD16-	HLA-DR+/CD7-			LPS	D09361	F	Rhesus		eventCount	376
R2W9_D09361_Rh_F_LPS.fcs	CD11b-/CD16-	CD11b-/CD16-	HLA-DR+/CD7-			LPS	D09361	F	Rhesus	HLA-DR+/CD7-	percent	13.777940637596188
R2W9_D09361_Rh_F_LPS.fcs	CD11b+/CD16-	CD11b+/CD16-	HLA-DR+/CD7-			LPS	D09361	F	Rhesus		eventCount	1068
R2W9_D09361_Rh_F_LPS.fcs	CD11b+/CD16-	CD11b+/CD16-	HLA-DR+/CD7-			LPS	D09361	F	Rhesus	HLA-DR+/CD7-	percent	39.135214364235985
R2W9_D09361_Rh_F_LPS.fcs	CD16+/CD11b-	CD16+/CD11b-	HLA-DR+/CD7-			LPS	D09361	F	Rhesus		eventCount	944
R2W9_D09361_Rh_F_LPS.fcs	CD16+/CD11b-	CD16+/CD11b-	HLA-DR+/CD7-			LPS	D09361	F	Rhesus	HLA-DR+/CD7-	percent	34.59142543056065
R2W9_D09361_Rh_F_LPS.fcs	CD16+/CD11b+	CD16+/CD11b+	HLA-DR+/CD7-			LPS	D09361	F	Rhesus		eventCount	324
R2W9_D09361_Rh_F_LPS.fcs	CD16+/CD11b+	CD16+/CD11b+	HLA-DR+/CD7-			LPS	D09361	F	Rhesus	HLA-DR+/CD7-	percent	11.872480762183951
R2W9_D09361_Rh_F_LPS.fcs	Neutrophils	Neutrophils	Non-Basophils			LPS	D09361	F	Rhesus		eventCount	27369
R2W9_D09361_Rh_F_LPS.fcs	Neutrophils	Neutrophils	Non-Basophils			LPS	D09361	F	Rhesus	Non-Basophils	percent	24.047552103468878
R2W9_D09361_Rh_F_LPS.fcs	CD8+T cells	CD8+T cells	T Cells			LPS	D09361	F	Rhesus		eventCount	21082
R2W9_D09361_Rh_F_LPS.fcs	CD8+T cells	CD8+T cells	T Cells			LPS	D09361	F	Rhesus	T Cells	percent	41.2353792590854
R2W9_D09361_Rh_F_LPS.fcs	CD4+T cells	CD4+T cells	T Cells			LPS	D09361	F	Rhesus		eventCount	16445
R2W9_D09361_Rh_F_LPS.fcs	CD4+T cells	CD4+T cells	T Cells			LPS	D09361	F	Rhesus	T Cells	percent	32.165630012126904
R2W9_D09361_Rh_F_LPS.fcs	CD4+/CD8+	CD4+/CD8+	T Cells			LPS	D09361	F	Rhesus		eventCount	10664
R2W9_D09361_Rh_F_LPS.fcs	CD4+/CD8+	CD4+/CD8+	T Cells			LPS	D09361	F	Rhesus	T Cells	percent	20.858271720846535
R2W9_D09361_Rh_F_IL-12.fcs	Basophils	Basophils	Singlets			IL-12	D09361	F	Rhesus		eventCount	210
R2W9_D09361_Rh_F_IL-12.fcs	Basophils	Basophils	Singlets			IL-12	D09361	F	Rhesus	Singlets	percent	0.10073053622222115
R2W9_D09361_Rh_F_IL-12.fcs	B Cells	B Cells	CD45+ CD66-			IL-12	D09361	F	Rhesus		eventCount	6557
R2W9_D09361_Rh_F_IL-12.fcs	B Cells	B Cells	CD45+ CD66-			IL-12	D09361	F	Rhesus	CD45+ CD66-	percent	5.493050959629384
R2W9_D09361_Rh_F_IL-12.fcs	CD1c+ B cells	CD1c+ B cells	B Cells			IL-12	D09361	F	Rhesus		eventCount	209
R2W9_D09361_Rh_F_IL-12.fcs	CD1c+ B cells	CD1c+ B cells	B Cells			IL-12	D09361	F	Rhesus	B Cells	percent	3.1874332774134513
R2W9_D09361_Rh_F_IL-12.fcs	CD7+/HLA-DR-	CD7+/HLA-DR-	CD19- CD3-			IL-12	D09361	F	Rhesus		eventCount	19171
R2W9_D09361_Rh_F_IL-12.fcs	CD7+/HLA-DR-	CD7+/HLA-DR-	CD19- CD3-			IL-12	D09361	F	Rhesus	CD19- CD3-	percent	74.83702228988562
R2W9_D09361_Rh_F_IL-12.fcs	pDCs	pDCs	HLA-DR+ CD11c-			IL-12	D09361	F	Rhesus		eventCount	40
R2W9_D09361_Rh_F_IL-12.fcs	pDCs	pDCs	HLA-DR+ CD11c-			IL-12	D09361	F	Rhesus	HLA-DR+ CD11c-	percent	2.9563932002956395
R2W9_D09361_Rh_F_IL-12.fcs	CD11b-/CD16-	CD11b-/CD16-	HLA-DR+/CD7-			IL-12	D09361	F	Rhesus		eventCount	502
R2W9_D09361_Rh_F_IL-12.fcs	CD11b-/CD16-	CD11b-/CD16-	HLA-DR+/CD7-			IL-12	D09361	F	Rhesus	HLA-DR+/CD7-	percent	12.56885327991988
R2W9_D09361_Rh_F_IL-12.fcs	CD11b+/CD16-	CD11b+/CD16-	HLA-DR+/CD7-			IL-12	D09361	F	Rhesus		eventCount	1656
R2W9_D09361_Rh_F_IL-12.fcs	CD11b+/CD16-	CD11b+/CD16-	HLA-DR+/CD7-			IL-12	D09361	F	Rhesus	HLA-DR+/CD7-	percent	41.4621932899349
R2W9_D09361_Rh_F_IL-12.fcs	CD16+/CD11b-	CD16+/CD11b-	HLA-DR+/CD7-			IL-12	D09361	F	Rhesus		eventCount	1358
R2W9_D09361_Rh_F_IL-12.fcs	CD16+/CD11b-	CD16+/CD11b-	HLA-DR+/CD7-			IL-12	D09361	F	Rhesus	HLA-DR+/CD7-	percent	34.00100150225338
R2W9_D09361_Rh_F_IL-12.fcs	CD16+/CD11b+	CD16+/CD11b+	HLA-DR+/CD7-			IL-12	D09361	F	Rhesus		eventCount	446
R2W9_D09361_Rh_F_IL-12.fcs	CD16+/CD11b+	CD16+/CD11b+	HLA-DR+/CD7-			IL-12	D09361	F	Rhesus	HLA-DR+/CD7-	percent	11.166750125187782
R2W9_D09361_Rh_F_IL-12.fcs	Neutrophils	Neutrophils	Non-Basophils			IL-12	D09361	F	Rhesus		eventCount	43222
R2W9_D09361_Rh_F_IL-12.fcs	Neutrophils	Neutrophils	Non-Basophils			IL-12	D09361	F	Rhesus	Non-Basophils	percent	20.766429319572968
R2W9_D09361_Rh_F_IL-12.fcs	CD8+T cells	CD8+T cells	T Cells			IL-12	D09361	F	Rhesus		eventCount	31557
R2W9_D09361_Rh_F_IL-12.fcs	CD8+T cells	CD8+T cells	T Cells			IL-12	D09361	F	Rhesus	T Cells	percent	37.96833265153885
R2W9_D09361_Rh_F_IL-12.fcs	CD4+T cells	CD4+T cells	T Cells			IL-12	D09361	F	Rhesus		eventCount	27017
R2W9_D09361_Rh_F_IL-12.fcs	CD4+T cells	CD4+T cells	T Cells			IL-12	D09361	F	Rhesus	T Cells	percent	32.50595567533749
R2W9_D09361_Rh_F_IL-12.fcs	CD4+/CD8+	CD4+/CD8+	T Cells			IL-12	D09361	F	Rhesus		eventCount	19409
R2W9_D09361_Rh_F_IL-12.fcs	CD4+/CD8+	CD4+/CD8+	T Cells			IL-12	D09361	F	Rhesus	T Cells	percent	23.352263156628247
R2W9_D09361_Rh_F_IL-6.fcs	Basophils	Basophils	Singlets			IL-6	D09361	F	Rhesus		eventCount	133
R2W9_D09361_Rh_F_IL-6.fcs	Basophils	Basophils	Singlets			IL-6	D09361	F	Rhesus	Singlets	percent	0.10992371459505922
R2W9_D09361_Rh_F_IL-6.fcs	B Cells	B Cells	CD45+ CD66-			IL-6	D09361	F	Rhesus		eventCount	4595
R2W9_D09361_Rh_F_IL-6.fcs	B Cells	B Cells	CD45+ CD66-			IL-6	D09361	F	Rhesus	CD45+ CD66-	percent	6.134191274630213
R2W9_D09361_Rh_F_IL-6.fcs	CD1c+ B cells	CD1c+ B cells	B Cells			IL-6	D09361	F	Rhesus		eventCount	71
R2W9_D09361_Rh_F_IL-6.fcs	CD1c+ B cells	CD1c+ B cells	B Cells			IL-6	D09361	F	Rhesus	B Cells	percent	1.5451577801958651
R2W9_D09361_Rh_F_IL-6.fcs	CD7+/HLA-DR-	CD7+/HLA-DR-	CD19- CD3-			IL-6	D09361	F	Rhesus		eventCount	8908
R2W9_D09361_Rh_F_IL-6.fcs	CD7+/HLA-DR-	CD7+/HLA-DR-	CD19- CD3-			IL-6	D09361	F	Rhesus	CD19- CD3-	percent	64.61627738285218
R2W9_D09361_Rh_F_IL-6.fcs	pDCs	pDCs	HLA-DR+ CD11c-			IL-6	D09361	F	Rhesus		eventCount	24
R2W9_D09361_Rh_F_IL-6.fcs	pDCs	pDCs	HLA-DR+ CD11c-			IL-6	D09361	F	Rhesus	HLA-DR+ CD11c-	percent	2.2535211267605635
R2W9_D09361_Rh_F_IL-6.fcs	CD11b-/CD16-	CD11b-/CD16-	HLA-DR+/CD7-			IL-6	D09361	F	Rhesus		eventCount	363
R2W9_D09361_Rh_F_IL-6.fcs	CD11b-/CD16-	CD11b-/CD16-	HLA-DR+/CD7-			IL-6	D09361	F	Rhesus	HLA-DR+/CD7-	percent	12.309257375381485
R2W9_D09361_Rh_F_IL-6.fcs	CD11b+/CD16-	CD11b+/CD16-	HLA-DR+/CD7-			IL-6	D09361	F	Rhesus		eventCount	1200
R2W9_D09361_Rh_F_IL-6.fcs	CD11b+/CD16-	CD11b+/CD16-	HLA-DR+/CD7-			IL-6	D09361	F	Rhesus	HLA-DR+/CD7-	percent	40.691759918616484
R2W9_D09361_Rh_F_IL-6.fcs	CD16+/CD11b-	CD16+/CD11b-	HLA-DR+/CD7-			IL-6	D09361	F	Rhesus		eventCount	1037
R2W9_D09361_Rh_F_IL-6.fcs	CD16+/CD11b-	CD16+/CD11b-	HLA-DR+/CD7-			IL-6	D09361	F	Rhesus	HLA-DR+/CD7-	percent	35.16446252967108
R2W9_D09361_Rh_F_IL-6.fcs	CD16+/CD11b+	CD16+/CD11b+	HLA-DR+/CD7-			IL-6	D09361	F	Rhesus		eventCount	322
R2W9_D09361_Rh_F_IL-6.fcs	CD16+/CD11b+	CD16+/CD11b+	HLA-DR+/CD7-			IL-6	D09361	F	Rhesus	HLA-DR+/CD7-	percent	10.91895557816209
R2W9_D09361_Rh_F_IL-6.fcs	Neutrophils	Neutrophils	Non-Basophils			IL-6	D09361	F	Rhesus		eventCount	28747
R2W9_D09361_Rh_F_IL-6.fcs	Neutrophils	Neutrophils	Non-Basophils			IL-6	D09361	F	Rhesus	Non-Basophils	percent	23.800928954057344
R2W9_D09361_Rh_F_IL-6.fcs	CD8+T cells	CD8+T cells	T Cells			IL-6	D09361	F	Rhesus		eventCount	22666
R2W9_D09361_Rh_F_IL-6.fcs	CD8+T cells	CD8+T cells	T Cells			IL-6	D09361	F	Rhesus	T Cells	percent	41.175722564354096
R2W9_D09361_Rh_F_IL-6.fcs	CD4+T cells	CD4+T cells	T Cells			IL-6	D09361	F	Rhesus		eventCount	17851
R2W9_D09361_Rh_F_IL-6.fcs	CD4+T cells	CD4+T cells	T Cells			IL-6	D09361	F	Rhesus	T Cells	percent	32.42865187930314
R2W9_D09361_Rh_F_IL-6.fcs	CD4+/CD8+	CD4+/CD8+	T Cells			IL-6	D09361	F	Rhesus		eventCount	11259
R2W9_D09361_Rh_F_IL-6.fcs	CD4+/CD8+	CD4+/CD8+	T Cells			IL-6	D09361	F	Rhesus	T Cells	percent	20.453430704670556
R2W9_D09361_Rh_F_IL-4.fcs	Basophils	Basophils	Singlets			IL-4	D09361	F	Rhesus		eventCount	150
R2W9_D09361_Rh_F_IL-4.fcs	Basophils	Basophils	Singlets			IL-4	D09361	F	Rhesus	Singlets	percent	0.1231668664706945
R2W9_D09361_Rh_F_IL-4.fcs	B Cells	B Cells	CD45+ CD66-			IL-4	D09361	F	Rhesus		eventCount	4466
R2W9_D09361_Rh_F_IL-4.fcs	B Cells	B Cells	CD45+ CD66-			IL-4	D09361	F	Rhesus	CD45+ CD66-	percent	6.006644160804831
R2W9_D09361_Rh_F_IL-4.fcs	CD1c+ B cells	CD1c+ B cells	B Cells			IL-4	D09361	F	Rhesus		eventCount	167
R2W9_D09361_Rh_F_IL-4.fcs	CD1c+ B cells	CD1c+ B cells	B Cells			IL-4	D09361	F	Rhesus	B Cells	percent	3.73936408419167
R2W9_D09361_Rh_F_IL-4.fcs	CD7+/HLA-DR-	CD7+/HLA-DR-	CD19- CD3-			IL-4	D09361	F	Rhesus		eventCount	9579
R2W9_D09361_Rh_F_IL-4.fcs	CD7+/HLA-DR-	CD7+/HLA-DR-	CD19- CD3-			IL-4	D09361	F	Rhesus	CD19- CD3-	percent	65.89845899834893
R2W9_D09361_Rh_F_IL-4.fcs	pDCs	pDCs	HLA-DR+ CD11c-			IL-4	D09361	F	Rhesus		eventCount	40
R2W9_D09361_Rh_F_IL-4.fcs	pDCs	pDCs	HLA-DR+ CD11c-			IL-4	D09361	F	Rhesus	HLA-DR+ CD11c-	percent	3.1372549019607843
R2W9_D09361_Rh_F_IL-4.fcs	CD11b-/CD16-	CD11b-/CD16-	HLA-DR+/CD7-			IL-4	D09361	F	Rhesus		eventCount	403
R2W9_D09361_Rh_F_IL-4.fcs	CD11b-/CD16-	CD11b-/CD16-	HLA-DR+/CD7-			IL-4	D09361	F	Rhesus	HLA-DR+/CD7-	percent	12.392373923739237
R2W9_D09361_Rh_F_IL-4.fcs	CD11b+/CD16-	CD11b+/CD16-	HLA-DR+/CD7-			IL-4	D09361	F	Rhesus		eventCount	1362
R2W9_D09361_Rh_F_IL-4.fcs	CD11b+/CD16-	CD11b+/CD16-	HLA-DR+/CD7-			IL-4	D09361	F	Rhesus	HLA-DR+/CD7-	percent	41.88191881918819
R2W9_D09361_Rh_F_IL-4.fcs	CD16+/CD11b-	CD16+/CD11b-	HLA-DR+/CD7-			IL-4	D09361	F	Rhesus		eventCount	1071
R2W9_D09361_Rh_F_IL-4.fcs	CD16+/CD11b-	CD16+/CD11b-	HLA-DR+/CD7-			IL-4	D09361	F	Rhesus	HLA-DR+/CD7-	percent	32.93357933579336
R2W9_D09361_Rh_F_IL-4.fcs	CD16+/CD11b+	CD16+/CD11b+	HLA-DR+/CD7-			IL-4	D09361	F	Rhesus		eventCount	393
R2W9_D09361_Rh_F_IL-4.fcs	CD16+/CD11b+	CD16+/CD11b+	HLA-DR+/CD7-			IL-4	D09361	F	Rhesus	HLA-DR+/CD7-	percent	12.084870848708487
R2W9_D09361_Rh_F_IL-4.fcs	Neutrophils	Neutrophils	Non-Basophils			IL-4	D09361	F	Rhesus		eventCount	28795
R2W9_D09361_Rh_F_IL-4.fcs	Neutrophils	Neutrophils	Non-Basophils			IL-4	D09361	F	Rhesus	Non-Basophils	percent	23.683020109388494
R2W9_D09361_Rh_F_IL-4.fcs	CD8+T cells	CD8+T cells	T Cells			IL-4	D09361	F	Rhesus		eventCount	22246
R2W9_D09361_Rh_F_IL-4.fcs	CD8+T cells	CD8+T cells	T Cells			IL-4	D09361	F	Rhesus	T Cells	percent	41.291879350348026
R2W9_D09361_Rh_F_IL-4.fcs	CD4+T cells	CD4+T cells	T Cells			IL-4	D09361	F	Rhesus		eventCount	16952
R2W9_D09361_Rh_F_IL-4.fcs	CD4+T cells	CD4+T cells	T Cells			IL-4	D09361	F	Rhesus	T Cells	percent	31.465429234338746
R2W9_D09361_Rh_F_IL-4.fcs	CD4+/CD8+	CD4+/CD8+	T Cells			IL-4	D09361	F	Rhesus		eventCount	11630
R2W9_D09361_Rh_F_IL-4.fcs	CD4+/CD8+	CD4+/CD8+	T Cells			IL-4	D09361	F	Rhesus	T Cells	percent	21.587006960556845
R2W9_D09361_Rh_F_IL-2.fcs	Basophils	Basophils	Singlets			IL-2	D09361	F	Rhesus		eventCount	159
R2W9_D09361_Rh_F_IL-2.fcs	Basophils	Basophils	Singlets			IL-2	D09361	F	Rhesus	Singlets	percent	0.09242197899289106
R2W9_D09361_Rh_F_IL-2.fcs	B Cells	B Cells	CD45+ CD66-			IL-2	D09361	F	Rhesus		eventCount	5986
R2W9_D09361_Rh_F_IL-2.fcs	B Cells	B Cells	CD45+ CD66-			IL-2	D09361	F	Rhesus	CD45+ CD66-	percent	5.788272607720275
R2W9_D09361_Rh_F_IL-2.fcs	CD1c+ B cells	CD1c+ B cells	B Cells			IL-2	D09361	F	Rhesus		eventCount	109
R2W9_D09361_Rh_F_IL-2.fcs	CD1c+ B cells	CD1c+ B cells	B Cells			IL-2	D09361	F	Rhesus	B Cells	percent	1.8209154694286669
R2W9_D09361_Rh_F_IL-2.fcs	CD7+/HLA-DR-	CD7+/HLA-DR-	CD19- CD3-			IL-2	D09361	F	Rhesus		eventCount	13369
R2W9_D09361_Rh_F_IL-2.fcs	CD7+/HLA-DR-	CD7+/HLA-DR-	CD19- CD3-			IL-2	D09361	F	Rhesus	CD19- CD3-	percent	70.04977731202516
R2W9_D09361_Rh_F_IL-2.fcs	pDCs	pDCs	HLA-DR+ CD11c-			IL-2	D09361	F	Rhesus		eventCount	24
R2W9_D09361_Rh_F_IL-2.fcs	pDCs	pDCs	HLA-DR+ CD11c-			IL-2	D09361	F	Rhesus	HLA-DR+ CD11c-	percent	1.8058690744920993
R2W9_D09361_Rh_F_IL-2.fcs	CD11b-/CD16-	CD11b-/CD16-	HLA-DR+/CD7-			IL-2	D09361	F	Rhesus		eventCount	441
R2W9_D09361_Rh_F_IL-2.fcs	CD11b-/CD16-	CD11b-/CD16-	HLA-DR+/CD7-			IL-2	D09361	F	Rhesus	HLA-DR+/CD7-	percent	12.105407631073291
R2W9_D09361_Rh_F_IL-2.fcs	CD11b+/CD16-	CD11b+/CD16-	HLA-DR+/CD7-			IL-2	D09361	F	Rhesus		eventCount	1563
R2W9_D09361_Rh_F_IL-2.fcs	CD11b+/CD16-	CD11b+/CD16-	HLA-DR+/CD7-			IL-2	D09361	F	Rhesus	HLA-DR+/CD7-	percent	42.904199835300574
R2W9_D09361_Rh_F_IL-2.fcs	CD16+/CD11b-	CD16+/CD11b-	HLA-DR+/CD7-			IL-2	D09361	F	Rhesus		eventCount	1216
R2W9_D09361_Rh_F_IL-2.fcs	CD16+/CD11b-	CD16+/CD11b-	HLA-DR+/CD7-			IL-2	D09361	F	Rhesus	HLA-DR+/CD7-	percent	33.37908317320889
R2W9_D09361_Rh_F_IL-2.fcs	CD16+/CD11b+	CD16+/CD11b+	HLA-DR+/CD7-			IL-2	D09361	F	Rhesus		eventCount	390
R2W9_D09361_Rh_F_IL-2.fcs	CD16+/CD11b+	CD16+/CD11b+	HLA-DR+/CD7-			IL-2	D09361	F	Rhesus	HLA-DR+/CD7-	percent	10.705462530881142
R2W9_D09361_Rh_F_IL-2.fcs	Neutrophils	Neutrophils	Non-Basophils			IL-2	D09361	F	Rhesus		eventCount	37773
R2W9_D09361_Rh_F_IL-2.fcs	Neutrophils	Neutrophils	Non-Basophils			IL-2	D09361	F	Rhesus	Non-Basophils	percent	21.991476578055682
R2W9_D09361_Rh_F_IL-2.fcs	CD8+T cells	CD8+T cells	T Cells			IL-2	D09361	F	Rhesus		eventCount	29545
R2W9_D09361_Rh_F_IL-2.fcs	CD8+T cells	CD8+T cells	T Cells			IL-2	D09361	F	Rhesus	T Cells	percent	39.1397080253292
R2W9_D09361_Rh_F_IL-2.fcs	CD4+T cells	CD4+T cells	T Cells			IL-2	D09361	F	Rhesus		eventCount	24984
R2W9_D09361_Rh_F_IL-2.fcs	CD4+T cells	CD4+T cells	T Cells			IL-2	D09361	F	Rhesus	T Cells	percent	33.09752801844051
R2W9_D09361_Rh_F_IL-2.fcs	CD4+/CD8+	CD4+/CD8+	T Cells			IL-2	D09361	F	Rhesus		eventCount	16256
R2W9_D09361_Rh_F_IL-2.fcs	CD4+/CD8+	CD4+/CD8+	T Cells			IL-2	D09361	F	Rhesus	T Cells	percent	21.53511909493151
R2W9_D09361_Rh_F_IFNg.fcs	Basophils	Basophils	Singlets			IFNg	D09361	F	Rhesus		eventCount	163
R2W9_D09361_Rh_F_IFNg.fcs	Basophils	Basophils	Singlets			IFNg	D09361	F	Rhesus	Singlets	percent	0.09905382329527154
R2W9_D09361_Rh_F_IFNg.fcs	B Cells	B Cells	CD45+ CD66-			IFNg	D09361	F	Rhesus		eventCount	6522
R2W9_D09361_Rh_F_IFNg.fcs	B Cells	B Cells	CD45+ CD66-			IFNg	D09361	F	Rhesus	CD45+ CD66-	percent	6.161258325067309
R2W9_D09361_Rh_F_IFNg.fcs	CD1c+ B cells	CD1c+ B cells	B Cells			IFNg	D09361	F	Rhesus		eventCount	124
R2W9_D09361_Rh_F_IFNg.fcs	CD1c+ B cells	CD1c+ B cells	B Cells			IFNg	D09361	F	Rhesus	B Cells	percent	1.9012572830420116
R2W9_D09361_Rh_F_IFNg.fcs	CD7+/HLA-DR-	CD7+/HLA-DR-	CD19- CD3-			IFNg	D09361	F	Rhesus		eventCount	12580
R2W9_D09361_Rh_F_IFNg.fcs	CD7+/HLA-DR-	CD7+/HLA-DR-	CD19- CD3-			IFNg	D09361	F	Rhesus	CD19- CD3-	percent	65.89492430988423
R2W9_D09361_Rh_F_IFNg.fcs	pDCs	pDCs	HLA-DR+ CD11c-			IFNg	D09361	F	Rhesus		eventCount	36
R2W9_D09361_Rh_F_IFNg.fcs	pDCs	pDCs	HLA-DR+ CD11c-			IFNg	D09361	F	Rhesus	HLA-DR+ CD11c-	percent	2.406417112299465
R2W9_D09361_Rh_F_IFNg.fcs	CD11b-/CD16-	CD11b-/CD16-	HLA-DR+/CD7-			IFNg	D09361	F	Rhesus		eventCount	520
R2W9_D09361_Rh_F_IFNg.fcs	CD11b-/CD16-	CD11b-/CD16-	HLA-DR+/CD7-			IFNg	D09361	F	Rhesus	HLA-DR+/CD7-	percent	12.664393570384803
R2W9_D09361_Rh_F_IFNg.fcs	CD11b+/CD16-	CD11b+/CD16-	HLA-DR+/CD7-			IFNg	D09361	F	Rhesus		eventCount	1722
R2W9_D09361_Rh_F_IFNg.fcs	CD11b+/CD16-	CD11b+/CD16-	HLA-DR+/CD7-			IFNg	D09361	F	Rhesus	HLA-DR+/CD7-	percent	41.93862640038967
R2W9_D09361_Rh_F_IFNg.fcs	CD16+/CD11b-	CD16+/CD11b-	HLA-DR+/CD7-			IFNg	D09361	F	Rhesus		eventCount	1412
R2W9_D09361_Rh_F_IFNg.fcs	CD16+/CD11b-	CD16+/CD11b-	HLA-DR+/CD7-			IFNg	D09361	F	Rhesus	HLA-DR+/CD7-	percent	34.38869946419873
R2W9_D09361_Rh_F_IFNg.fcs	CD16+/CD11b+	CD16+/CD11b+	HLA-DR+/CD7-			IFNg	D09361	F	Rhesus		eventCount	421
R2W9_D09361_Rh_F_IFNg.fcs	CD16+/CD11b+	CD16+/CD11b+	HLA-DR+/CD7-			IFNg	D09361	F	Rhesus	HLA-DR+/CD7-	percent	10.253287871407696
R2W9_D09361_Rh_F_IFNg.fcs	Neutrophils	Neutrophils	Non-Basophils			IFNg	D09361	F	Rhesus		eventCount	39453
R2W9_D09361_Rh_F_IFNg.fcs	Neutrophils	Neutrophils	Non-Basophils			IFNg	D09361	F	Rhesus	Non-Basophils	percent	24.010297169495548
R2W9_D09361_Rh_F_IFNg.fcs	CD8+T cells	CD8+T cells	T Cells			IFNg	D09361	F	Rhesus		eventCount	32522
R2W9_D09361_Rh_F_IFNg.fcs	CD8+T cells	CD8+T cells	T Cells			IFNg	D09361	F	Rhesus	T Cells	percent	41.44566644152468
R2W9_D09361_Rh_F_IFNg.fcs	CD4+T cells	CD4+T cells	T Cells			IFNg	D09361	F	Rhesus		eventCount	26027
R2W9_D09361_Rh_F_IFNg.fcs	CD4+T cells	CD4+T cells	T Cells			IFNg	D09361	F	Rhesus	T Cells	percent	33.168512406173136
R2W9_D09361_Rh_F_IFNg.fcs	CD4+/CD8+	CD4+/CD8+	T Cells			IFNg	D09361	F	Rhesus		eventCount	15311
R2W9_D09361_Rh_F_IFNg.fcs	CD4+/CD8+	CD4+/CD8+	T Cells			IFNg	D09361	F	Rhesus	T Cells	percent	19.512164039302146
R2W9_D09361_Rh_F_IFNb.fcs	Basophils	Basophils	Singlets			IFNb	D09361	F	Rhesus		eventCount	126
R2W9_D09361_Rh_F_IFNb.fcs	Basophils	Basophils	Singlets			IFNb	D09361	F	Rhesus	Singlets	percent	0.1122754491017964
R2W9_D09361_Rh_F_IFNb.fcs	B Cells	B Cells	CD45+ CD66-			IFNb	D09361	F	Rhesus		eventCount	4632
R2W9_D09361_Rh_F_IFNb.fcs	B Cells	B Cells	CD45+ CD66-			IFNb	D09361	F	Rhesus	CD45+ CD66-	percent	6.180944755804644
R2W9_D09361_Rh_F_IFNb.fcs	CD1c+ B cells	CD1c+ B cells	B Cells			IFNb	D09361	F	Rhesus		eventCount	172
R2W9_D09361_Rh_F_IFNb.fcs	CD1c+ B cells	CD1c+ B cells	B Cells			IFNb	D09361	F	Rhesus	B Cells	percent	3.7132987910189983
R2W9_D09361_Rh_F_IFNb.fcs	CD7+/HLA-DR-	CD7+/HLA-DR-	CD19- CD3-			IFNb	D09361	F	Rhesus		eventCount	10136
R2W9_D09361_Rh_F_IFNb.fcs	CD7+/HLA-DR-	CD7+/HLA-DR-	CD19- CD3-			IFNb	D09361	F	Rhesus	CD19- CD3-	percent	65.20005146018268
R2W9_D09361_Rh_F_IFNb.fcs	pDCs	pDCs	HLA-DR+ CD11c-			IFNb	D09361	F	Rhesus		eventCount	33
R2W9_D09361_Rh_F_IFNb.fcs	pDCs	pDCs	HLA-DR+ CD11c-			IFNb	D09361	F	Rhesus	HLA-DR+ CD11c-	percent	2.8085106382978724
R2W9_D09361_Rh_F_IFNb.fcs	CD11b-/CD16-	CD11b-/CD16-	HLA-DR+/CD7-			IFNb	D09361	F	Rhesus		eventCount	501
R2W9_D09361_Rh_F_IFNb.fcs	CD11b-/CD16-	CD11b-/CD16-	HLA-DR+/CD7-			IFNb	D09361	F	Rhesus	HLA-DR+/CD7-	percent	15.031503150315032
R2W9_D09361_Rh_F_IFNb.fcs	CD11b+/CD16-	CD11b+/CD16-	HLA-DR+/CD7-			IFNb	D09361	F	Rhesus		eventCount	1262
R2W9_D09361_Rh_F_IFNb.fcs	CD11b+/CD16-	CD11b+/CD16-	HLA-DR+/CD7-			IFNb	D09361	F	Rhesus	HLA-DR+/CD7-	percent	37.86378637863786
R2W9_D09361_Rh_F_IFNb.fcs	CD16+/CD11b-	CD16+/CD11b-	HLA-DR+/CD7-			IFNb	D09361	F	Rhesus		eventCount	1176
R2W9_D09361_Rh_F_IFNb.fcs	CD16+/CD11b-	CD16+/CD11b-	HLA-DR+/CD7-			IFNb	D09361	F	Rhesus	HLA-DR+/CD7-	percent	35.28352835283528
R2W9_D09361_Rh_F_IFNb.fcs	CD16+/CD11b+	CD16+/CD11b+	HLA-DR+/CD7-			IFNb	D09361	F	Rhesus		eventCount	364
R2W9_D09361_Rh_F_IFNb.fcs	CD16+/CD11b+	CD16+/CD11b+	HLA-DR+/CD7-			IFNb	D09361	F	Rhesus	HLA-DR+/CD7-	percent	10.921092109210921
R2W9_D09361_Rh_F_IFNb.fcs	Neutrophils	Neutrophils	Non-Basophils			IFNb	D09361	F	Rhesus		eventCount	26601
R2W9_D09361_Rh_F_IFNb.fcs	Neutrophils	Neutrophils	Non-Basophils			IFNb	D09361	F	Rhesus	Non-Basophils	percent	23.740082640940287
R2W9_D09361_Rh_F_IFNb.fcs	CD8+T cells	CD8+T cells	T Cells			IFNb	D09361	F	Rhesus		eventCount	22091
R2W9_D09361_Rh_F_IFNb.fcs	CD8+T cells	CD8+T cells	T Cells			IFNb	D09361	F	Rhesus	T Cells	percent	41.436422636130025
R2W9_D09361_Rh_F_IFNb.fcs	CD4+T cells	CD4+T cells	T Cells			IFNb	D09361	F	Rhesus		eventCount	17042
R2W9_D09361_Rh_F_IFNb.fcs	CD4+T cells	CD4+T cells	T Cells			IFNb	D09361	F	Rhesus	T Cells	percent	31.965937013486393
R2W9_D09361_Rh_F_IFNb.fcs	CD4+/CD8+	CD4+/CD8+	T Cells			IFNb	D09361	F	Rhesus		eventCount	11061
R2W9_D09361_Rh_F_IFNb.fcs	CD4+/CD8+	CD4+/CD8+	T Cells			IFNb	D09361	F	Rhesus	T Cells	percent	20.747284902369028
R2W9_D09361_Rh_F_IFNa2.fcs	Basophils	Basophils	Singlets			IFNa2	D09361	F	Rhesus		eventCount	102
R2W9_D09361_Rh_F_IFNa2.fcs	Basophils	Basophils	Singlets			IFNa2	D09361	F	Rhesus	Singlets	percent	0.09610945170500051
R2W9_D09361_Rh_F_IFNa2.fcs	B Cells	B Cells	CD45+ CD66-			IFNa2	D09361	F	Rhesus		eventCount	4437
R2W9_D09361_Rh_F_IFNa2.fcs	B Cells	B Cells	CD45+ CD66-			IFNa2	D09361	F	Rhesus	CD45+ CD66-	percent	6.344644159409721
R2W9_D09361_Rh_F_IFNa2.fcs	CD1c+ B cells	CD1c+ B cells	B Cells			IFNa2	D09361	F	Rhesus		eventCount	98
R2W9_D09361_Rh_F_IFNa2.fcs	CD1c+ B cells	CD1c+ B cells	B Cells			IFNa2	D09361	F	Rhesus	B Cells	percent	2.208699571782736
R2W9_D09361_Rh_F_IFNa2.fcs	CD7+/HLA-DR-	CD7+/HLA-DR-	CD19- CD3-			IFNa2	D09361	F	Rhesus		eventCount	8629
R2W9_D09361_Rh_F_IFNa2.fcs	CD7+/HLA-DR-	CD7+/HLA-DR-	CD19- CD3-			IFNa2	D09361	F	Rhesus	CD19- CD3-	percent	65.7047133175969
R2W9_D09361_Rh_F_IFNa2.fcs	pDCs	pDCs	HLA-DR+ CD11c-			IFNa2	D09361	F	Rhesus		eventCount	22
R2W9_D09361_Rh_F_IFNa2.fcs	pDCs	pDCs	HLA-DR+ CD11c-			IFNa2	D09361	F	Rhesus	HLA-DR+ CD11c-	percent	2.2222222222222223
R2W9_D09361_Rh_F_IFNa2.fcs	CD11b-/CD16-	CD11b-/CD16-	HLA-DR+/CD7-			IFNa2	D09361	F	Rhesus		eventCount	327
R2W9_D09361_Rh_F_IFNa2.fcs	CD11b-/CD16-	CD11b-/CD16-	HLA-DR+/CD7-			IFNa2	D09361	F	Rhesus	HLA-DR+/CD7-	percent	11.575221238938052
R2W9_D09361_Rh_F_IFNa2.fcs	CD11b+/CD16-	CD11b+/CD16-	HLA-DR+/CD7-			IFNa2	D09361	F	Rhesus		eventCount	1098
R2W9_D09361_Rh_F_IFNa2.fcs	CD11b+/CD16-	CD11b+/CD16-	HLA-DR+/CD7-			IFNa2	D09361	F	Rhesus	HLA-DR+/CD7-	percent	38.86725663716814
R2W9_D09361_Rh_F_IFNa2.fcs	CD16+/CD11b-	CD16+/CD11b-	HLA-DR+/CD7-			IFNa2	D09361	F	Rhesus		eventCount	1035
R2W9_D09361_Rh_F_IFNa2.fcs	CD16+/CD11b-	CD16+/CD11b-	HLA-DR+/CD7-			IFNa2	D09361	F	Rhesus	HLA-DR+/CD7-	percent	36.63716814159292
R2W9_D09361_Rh_F_IFNa2.fcs	CD16+/CD11b+	CD16+/CD11b+	HLA-DR+/CD7-			IFNa2	D09361	F	Rhesus		eventCount	343
R2W9_D09361_Rh_F_IFNa2.fcs	CD16+/CD11b+	CD16+/CD11b+	HLA-DR+/CD7-			IFNa2	D09361	F	Rhesus	HLA-DR+/CD7-	percent	12.141592920353983
R2W9_D09361_Rh_F_IFNa2.fcs	Neutrophils	Neutrophils	Non-Basophils			IFNa2	D09361	F	Rhesus		eventCount	26102
R2W9_D09361_Rh_F_IFNa2.fcs	Neutrophils	Neutrophils	Non-Basophils			IFNa2	D09361	F	Rhesus	Non-Basophils	percent	24.6277810276829
R2W9_D09361_Rh_F_IFNa2.fcs	CD8+T cells	CD8+T cells	T Cells			IFNa2	D09361	F	Rhesus		eventCount	21245
R2W9_D09361_Rh_F_IFNa2.fcs	CD8+T cells	CD8+T cells	T Cells			IFNa2	D09361	F	Rhesus	T Cells	percent	41.44961467173934
R2W9_D09361_Rh_F_IFNa2.fcs	CD4+T cells	CD4+T cells	T Cells			IFNa2	D09361	F	Rhesus		eventCount	16919
R2W9_D09361_Rh_F_IFNa2.fcs	CD4+T cells	CD4+T cells	T Cells			IFNa2	D09361	F	Rhesus	T Cells	percent	33.00946249146425
R2W9_D09361_Rh_F_IFNa2.fcs	CD4+/CD8+	CD4+/CD8+	T Cells			IFNa2	D09361	F	Rhesus		eventCount	10254
R2W9_D09361_Rh_F_IFNa2.fcs	CD4+/CD8+	CD4+/CD8+	T Cells			IFNa2	D09361	F	Rhesus	T Cells	percent	20.00585308750366
R2W9_D09361_Rh_F_GM-CSF.fcs	Basophils	Basophils	Singlets			GM-CSF	D09361	F	Rhesus		eventCount	100
R2W9_D09361_Rh_F_GM-CSF.fcs	Basophils	Basophils	Singlets			GM-CSF	D09361	F	Rhesus	Singlets	percent	0.09758096780803872
R2W9_D09361_Rh_F_GM-CSF.fcs	B Cells	B Cells	CD45+ CD66-			GM-CSF	D09361	F	Rhesus		eventCount	4181
R2W9_D09361_Rh_F_GM-CSF.fcs	B Cells	B Cells	CD45+ CD66-			GM-CSF	D09361	F	Rhesus	CD45+ CD66-	percent	6.262638366711104
R2W9_D09361_Rh_F_GM-CSF.fcs	CD1c+ B cells	CD1c+ B cells	B Cells			GM-CSF	D09361	F	Rhesus		eventCount	87
R2W9_D09361_Rh_F_GM-CSF.fcs	CD1c+ B cells	CD1c+ B cells	B Cells			GM-CSF	D09361	F	Rhesus	B Cells	percent	2.0808419038507533
R2W9_D09361_Rh_F_GM-CSF.fcs	CD7+/HLA-DR-	CD7+/HLA-DR-	CD19- CD3-			GM-CSF	D09361	F	Rhesus		eventCount	8247
R2W9_D09361_Rh_F_GM-CSF.fcs	CD7+/HLA-DR-	CD7+/HLA-DR-	CD19- CD3-			GM-CSF	D09361	F	Rhesus	CD19- CD3-	percent	65.62425399856768
R2W9_D09361_Rh_F_GM-CSF.fcs	pDCs	pDCs	HLA-DR+ CD11c-			GM-CSF	D09361	F	Rhesus		eventCount	23
R2W9_D09361_Rh_F_GM-CSF.fcs	pDCs	pDCs	HLA-DR+ CD11c-			GM-CSF	D09361	F	Rhesus	HLA-DR+ CD11c-	percent	2.3613963039014374
R2W9_D09361_Rh_F_GM-CSF.fcs	CD11b-/CD16-	CD11b-/CD16-	HLA-DR+/CD7-			GM-CSF	D09361	F	Rhesus		eventCount	321
R2W9_D09361_Rh_F_GM-CSF.fcs	CD11b-/CD16-	CD11b-/CD16-	HLA-DR+/CD7-			GM-CSF	D09361	F	Rhesus	HLA-DR+/CD7-	percent	12.466019417475728
R2W9_D09361_Rh_F_GM-CSF.fcs	CD11b+/CD16-	CD11b+/CD16-	HLA-DR+/CD7-			GM-CSF	D09361	F	Rhesus		eventCount	1061
R2W9_D09361_Rh_F_GM-CSF.fcs	CD11b+/CD16-	CD11b+/CD16-	HLA-DR+/CD7-			GM-CSF	D09361	F	Rhesus	HLA-DR+/CD7-	percent	41.20388349514563
R2W9_D09361_Rh_F_GM-CSF.fcs	CD16+/CD11b-	CD16+/CD11b-	HLA-DR+/CD7-			GM-CSF	D09361	F	Rhesus		eventCount	882
R2W9_D09361_Rh_F_GM-CSF.fcs	CD16+/CD11b-	CD16+/CD11b-	HLA-DR+/CD7-			GM-CSF	D09361	F	Rhesus	HLA-DR+/CD7-	percent	34.25242718446602
R2W9_D09361_Rh_F_GM-CSF.fcs	CD16+/CD11b+	CD16+/CD11b+	HLA-DR+/CD7-			GM-CSF	D09361	F	Rhesus		eventCount	280
R2W9_D09361_Rh_F_GM-CSF.fcs	CD16+/CD11b+	CD16+/CD11b+	HLA-DR+/CD7-			GM-CSF	D09361	F	Rhesus	HLA-DR+/CD7-	percent	10.87378640776699
R2W9_D09361_Rh_F_GM-CSF.fcs	Neutrophils	Neutrophils	Non-Basophils			GM-CSF	D09361	F	Rhesus		eventCount	24589
R2W9_D09361_Rh_F_GM-CSF.fcs	Neutrophils	Neutrophils	Non-Basophils			GM-CSF	D09361	F	Rhesus	Non-Basophils	percent	24.030295626679695
R2W9_D09361_Rh_F_GM-CSF.fcs	CD8+T cells	CD8+T cells	T Cells			GM-CSF	D09361	F	Rhesus		eventCount	20574
R2W9_D09361_Rh_F_GM-CSF.fcs	CD8+T cells	CD8+T cells	T Cells			GM-CSF	D09361	F	Rhesus	T Cells	percent	42.02978488692774
R2W9_D09361_Rh_F_GM-CSF.fcs	CD4+T cells	CD4+T cells	T Cells			GM-CSF	D09361	F	Rhesus		eventCount	15625
R2W9_D09361_Rh_F_GM-CSF.fcs	CD4+T cells	CD4+T cells	T Cells			GM-CSF	D09361	F	Rhesus	T Cells	percent	31.919674776817633
R2W9_D09361_Rh_F_GM-CSF.fcs	CD4+/CD8+	CD4+/CD8+	T Cells			GM-CSF	D09361	F	Rhesus		eventCount	9963
R2W9_D09361_Rh_F_GM-CSF.fcs	CD4+/CD8+	CD4+/CD8+	T Cells			GM-CSF	D09361	F	Rhesus	T Cells	percent	20.35300606729178
R2W9_D09361_Rh_F_Ebola VLPs.fcs	Basophils	Basophils	Singlets			Ebola VLPs	D09361	F	Rhesus		eventCount	85
R2W9_D09361_Rh_F_Ebola VLPs.fcs	Basophils	Basophils	Singlets			Ebola VLPs	D09361	F	Rhesus	Singlets	percent	0.06998246321804065
R2W9_D09361_Rh_F_Ebola VLPs.fcs	B Cells	B Cells	CD45+ CD66-			Ebola VLPs	D09361	F	Rhesus		eventCount	4617
R2W9_D09361_Rh_F_Ebola VLPs.fcs	B Cells	B Cells	CD45+ CD66-			Ebola VLPs	D09361	F	Rhesus	CD45+ CD66-	percent	6.078999341672152
R2W9_D09361_Rh_F_Ebola VLPs.fcs	CD1c+ B cells	CD1c+ B cells	B Cells			Ebola VLPs	D09361	F	Rhesus		eventCount	63
R2W9_D09361_Rh_F_Ebola VLPs.fcs	CD1c+ B cells	CD1c+ B cells	B Cells			Ebola VLPs	D09361	F	Rhesus	B Cells	percent	1.364522417153996
R2W9_D09361_Rh_F_Ebola VLPs.fcs	CD7+/HLA-DR-	CD7+/HLA-DR-	CD19- CD3-			Ebola VLPs	D09361	F	Rhesus		eventCount	9103
R2W9_D09361_Rh_F_Ebola VLPs.fcs	CD7+/HLA-DR-	CD7+/HLA-DR-	CD19- CD3-			Ebola VLPs	D09361	F	Rhesus	CD19- CD3-	percent	65.84448462929475
R2W9_D09361_Rh_F_Ebola VLPs.fcs	pDCs	pDCs	HLA-DR+ CD11c-			Ebola VLPs	D09361	F	Rhesus		eventCount	33
R2W9_D09361_Rh_F_Ebola VLPs.fcs	pDCs	pDCs	HLA-DR+ CD11c-			Ebola VLPs	D09361	F	Rhesus	HLA-DR+ CD11c-	percent	3.019213174748399
R2W9_D09361_Rh_F_Ebola VLPs.fcs	CD11b-/CD16-	CD11b-/CD16-	HLA-DR+/CD7-			Ebola VLPs	D09361	F	Rhesus		eventCount	383
R2W9_D09361_Rh_F_Ebola VLPs.fcs	CD11b-/CD16-	CD11b-/CD16-	HLA-DR+/CD7-			Ebola VLPs	D09361	F	Rhesus	HLA-DR+/CD7-	percent	13.197794624396968
R2W9_D09361_Rh_F_Ebola VLPs.fcs	CD11b+/CD16-	CD11b+/CD16-	HLA-DR+/CD7-			Ebola VLPs	D09361	F	Rhesus		eventCount	1212
R2W9_D09361_Rh_F_Ebola VLPs.fcs	CD11b+/CD16-	CD11b+/CD16-	HLA-DR+/CD7-			Ebola VLPs	D09361	F	Rhesus	HLA-DR+/CD7-	percent	41.76430048242592
R2W9_D09361_Rh_F_Ebola VLPs.fcs	CD16+/CD11b-	CD16+/CD11b-	HLA-DR+/CD7-			Ebola VLPs	D09361	F	Rhesus		eventCount	991
R2W9_D09361_Rh_F_Ebola VLPs.fcs	CD16+/CD11b-	CD16+/CD11b-	HLA-DR+/CD7-			Ebola VLPs	D09361	F	Rhesus	HLA-DR+/CD7-	percent	34.14886285320468
R2W9_D09361_Rh_F_Ebola VLPs.fcs	CD16+/CD11b+	CD16+/CD11b+	HLA-DR+/CD7-			Ebola VLPs	D09361	F	Rhesus		eventCount	287
R2W9_D09361_Rh_F_Ebola VLPs.fcs	CD16+/CD11b+	CD16+/CD11b+	HLA-DR+/CD7-			Ebola VLPs	D09361	F	Rhesus	HLA-DR+/CD7-	percent	9.88973121984838
R2W9_D09361_Rh_F_Ebola VLPs.fcs	Neutrophils	Neutrophils	Non-Basophils			Ebola VLPs	D09361	F	Rhesus		eventCount	29729
R2W9_D09361_Rh_F_Ebola VLPs.fcs	Neutrophils	Neutrophils	Non-Basophils			Ebola VLPs	D09361	F	Rhesus	Non-Basophils	percent	24.509464450600184
R2W9_D09361_Rh_F_Ebola VLPs.fcs	CD8+T cells	CD8+T cells	T Cells			Ebola VLPs	D09361	F	Rhesus		eventCount	22916
R2W9_D09361_Rh_F_Ebola VLPs.fcs	CD8+T cells	CD8+T cells	T Cells			Ebola VLPs	D09361	F	Rhesus	T Cells	percent	40.83611026961527
R2W9_D09361_Rh_F_Ebola VLPs.fcs	CD4+T cells	CD4+T cells	T Cells			Ebola VLPs	D09361	F	Rhesus		eventCount	18432
[truncated: 70,385 more rows]
