# Supplementary material for: A Comprehensive Atlas of Immunological Differences Between Humans, Mice, and Non-Human Primates
Source: Front Immunol. 2022 Mar 11;13:867015. doi: 10.3389/fimmu.2022.867015 (PMC8962947; doi:10.3389/fimmu.2022.867015)
Supplement: Supplementary Table 2 — CyTOF Panel. Sheet 1-3: Extracellular antibody, clone, label, and staining concentrations for humans (sheet 1), macaques (sheet 2), AGMs (sheet 3), and mice (sheet 4). Sheet 5: Signaling and other post-permeabilization antibodies. *At time of rehydration, surface cocktail was supplemented with 8.64 µl of CD4 #201 (OKT4) per 12 LyoSpheres to increase signal. [file Table_2.xlsx]

## Sheet: Human
Antigen	Clone	Label	Vendor and Catalog	Species	Staining Concentration (µg/ml)	Canonical Target
CD235a	HIR2	113	Biolegend 306602	Human	0.67	Erythrocytes
CD45	HI30	115	Biolegend 304002	Human	3.25	Lymph/Mono
CD61	VI-PL2	140	Biolegend 336402	Human	5.37	Platelets
CD7	M-T701	141	BD 555359	Human	5.37	NK cells
CD33	AC104.3E3	142	Miltenyi (Custom)	Human	3.58	Myeoid
CD11c	Bu15	143	Biolegend 337202	Human	1.34	Myeloid, T subset
CD123	7G3	148	BD 554527	Human	1.34	pDCs
CD14	M5E2	151	Biolegend 301802	Human	10.73	Monocytes
CD11b	ICRF44	153	Biolegend 301302	Human	7.16	Myeloid cells
CD8	RPA-T8	155	Biolegend 301002	Human	1.41	CD8+ T cells
CD4*	OKT4	156	Biolegend 317402	Human	1.25	CD4+ T cells
CD3	SP34.2	157	BD 551916	Human	2.68	T cells
CD66	YTH71.3	158	Pierce MA1-36189	Human	3.41	Granulocytes
CD16	3G8	159	Biolegend 302033	Human	2.68	NK, mono, gran
CD1c	AD5-8E7	162	Miltenyi (Custom)	Human	1.34	DCs, B cells
BDCA3	1A4	164	BD 559780	Human	4.31	cDCs
CD45RA	HI100	166	Biolegend 304102	Human	2.68	Naïve T cells
CD161	HP-G310	168	Biolegend 339902	Human	5.37	NK cells
CCR7	150503	171	R&D MAB197-100	Human	7.01	T subset
CD19	J3-119	173	Beckman Coulter IM1313	Human	1.79	B cells
IgM	G20-127	174	BD 555780	Human	2.68	B cells, class-switched
CD56	NCAM16.2	175	BD 559043	Human	1.79	NK cells
HLA-DR	Immu357	176	Beckman Coulter Immu357	Human	0.34	APCs (B, DC)
Supplementary Table 2.

## Sheet: Macaque
Antigen	Clone	Label	Vendor and Catalog	Species	Straining Concentration (µg/ml)	Canonical Target
CD233	BRIC 6	113	IBGRL 9439	Macaque	4.11	Erythrocytes
CD45	DO58-1283	115	BD 552566	Macaque	5.37	Lymph/Mono
CD61	VI-PL2	140	Biolegend 336402	Macaque	5.37	Platelets
CD7	M-T701	141	BD 555359	Macaque	5.37	NK cells
CD33	AC104.3E3	142	Miltenyi	Macaque	4.29	Granulocytes
CD11c	3.9	143	Biolegend	Macaque	1.34	Myeloid, T subset
CD123	7G3	148	BD 554527	Macaque	1.34	pDCs
CD14	M5E2	151	Biolegend 301810	Macaque	10.73	Monocytes
CD11b	ICRF44	153	Biolegend 301312	Macaque	6.71	Myeloid cells
CD8	RPA-T8	155	Biolegend 301002	Macaque	1.41	CD8+ T cells
CD4*	OKT4	156	Biolegend 317404	Macaque	1.25	CD4+ T cells
CD3	SP34.2	157	BD 551916	Macaque	2.68	T cells
CD66	YTH71.3	158	Thermo MA5-17003	Macaque	2.25	Granulocytes
CD16	3G8	159	Biolegend 302033	Macaque	2.68	NK, mono, gran
CD1c	AD5-8E7	162	Miltenyi	Macaque	1.34	DCs, B cells
BDCA3	1A4	164	BD 559780	Macaque	3.58	cDCs
CD45RA	HI100	166	Biolegend 304102	Macaque	2.68	Naïve T cells
CD161	HP-G310	168	Biolegend 339902	Macaque	3.08	NK cells
FITC	FIT-22	171	Biolegend 408302	Macaque	5.39
CD20	2H7	173	Biolegend 302302	Macaque	5.37	B cells
IgM	G20-127	174	BD 555780	Macaque	2.68	B cells, class-switched
CD56	NCAM16.2	175	BD 559403	Macaque	1.79	NK cells
HLA-DR	Immu357	176	Beckman Coulter	Macaque	0.34	APCs (B, DC)
CCR7	150503	FITC	BD 561271	Macaque	8.94	T subset
Supplementary Table 2.

## Sheet: AGM
Antigen	Clone	Label	Vendor and Catalog	Species	Straining Concentration (µg/ml)	Canonical Target
CD233	BRIC 6	113				Erythrocytes
CD45	DO58-1283	115	BD 552566	AGM	5.37	Lymph/Mono
CD61	VI-PL2	140	Biolegend 336402	AGM	5.37	Platelets
CD7	M-T701	141	BD 555359	AGM	5.37	NK cells
CD33	AC104.3E3	142	Miltenyi	AGM	4.29	Granulocytes
CD11c	3.9	143	Biolegend	AGM	1.34	Myeloid, T subset
CD123	7G3	148	BD 554527	AGM	1.34	pDCs
CD14	M5E2	151	Biolegend 301810	AGM	10.73	Monocytes
CD11b	ICRF44	153	Biolegend 301312	AGM	6.71	Myeloid cells
CD8	RPA-T8	155	Biolegend 301002	AGM	1.41	CD8+ T cells
CD4*	OKT4	156	Biolegend 317404	AGM	1.25	CD4+ T cells
CD3	SP34.2	157	BD 551916	AGM	2.68	T cells
CD66	YTH71.3	158	Thermo MA5-17003	AGM	2.25	Granulocytes
CD16	3G8	159	Biolegend 302033	AGM	2.68	NK, mono, gran
CD1c	AD5-8E7	162	Miltenyi	AGM	1.34	DCs, B cells
BDCA3	1A4	164	BD 559780	AGM	3.58	cDCs
CD45RA	HI100	166				Naïve T cells
CD161	HP-G310	168	Biolegend 339902	AGM	3.08	NK cells
FITC	FIT-22	171	Biolegend 408302	AGM	5.39
CD20	2H7	173	Biolegend 302302	AGM	5.37	B cells
IgM	G20-127	174	BD 555780	AGM	2.68	B cells, class-switched
CD56	NCAM16.2	175				NK cells
HLA-DR	Immu357	176	Beckman Coulter	AGM	0.34	APCs (B, DC)
CCR7	150503	FITC	BD 561271	AGM	8.94	T subset
Supplementary Table 2.

## Sheet: Mice
Antigen	Clone	Label	Vendor and Catalog	Species	Straining Concentration (µg/ml)
Ter119	TER-119	113	Biolegend 116202	Mice	5.37
CD45.2	104	115	Biolegend 109801	Mice	5.37
pan-CD45	30-F11	115	Biolegend 103102	Mice	5.37
CD61	2C9.G2	140	Biolegend 104302	Mice	1.34
B220	RA3-6B2	141	Biolegend 103202	Mice	22.68
CD49b	HMa2	142	Biolegend 103501	Mice	0.34
CD11c	HL3	143	BD 553799	Mice	0.34
BST-2	120g8	148	Dendritics DDX0390P-100	Mice	1.34
Ly6C	HK1.4	151	Biolegend 128002	Mice	0.34
CD11b	M1/70	153	Biolegend 101202	Mice	1.34
CD8	53-6.7	155	Biolegend 100702	Mice	0.34
CD4	RM4-5	156	Biolegend 100506	Mice	0.34
CD3	17A2	157	Biolegend 100202	Mice	0.34
Ly6G	1A8	158	Biolegend 127602	Mice	0.34
CD16/32	2.4G2	162	BD 553142	Mice	1.34
CD115	CSF-1R	164	Biolegend 135502	Mice	1.34
FcεRIa	MAR-1	166	Bioelgend 134302	Mice	0.34
NK1.1	PK136	168	Biolegend 108702	Mice	1.34
CD19	6D5	173	Biolegend 115502	Mice	1.34
IgM	RMM-1	174	Biolegend 406501	Mice	2.68
CD44	IM7	175	Biolegend 103002	Mice	0.34
MHC II	M5/114.15.2	176	Biolegend 107602	Mice	0.34
CD62L	MEL-14	FITC	Biolegend 104406	Mice	3.22
Supplementary Table 2.

## Sheet: Intracellular
Antigen	Clone	Label	Vendor and Catalog	Species	Straining Concentration (µg/ml)
STAT1 pY701	4a	147	BD Biosciences 612233	primates, mice	3.83, 6.97
STAT3 pY705	4	139	BD Biosciences 612357	all	5.82
STAT4 pY693	38	170	BD Biosciences 612738	all	5.66
STAT5 pY694	46	149	BD Biosciences 611965	all	5.37
STAT6 pY691	18, J71-773.58.11	165	BD Biosciences 611597	primates, mice	5.38, 8.33
Ki67	SolA15	169	Thermo Fisher 14-5698-82	all	3.36
Erk1/2 pT202/Y204	D13.14.4E	152	CST 4370	all	16.44
MAPKAPK2 pT334	27B7	144	CST 3007	all	2.29
CREB pS133	87G3	145	CST 9198	all	7.24
IkBa amino-terminal	L35A5	163	CST 4814	all	3.79
TBK1/NAK pS172	D52C2	161	CST 5483	all	10.78
S6 pS235/236	2F9	150	CST 4856	all	13.15
Zap70/Syk pY319/Y352	17a	160	BD Biosciences 612574	all	2.14
4E-BP1 pT37/46	236B4	172	CST 2855	all	3.13
PLCγ2 pY759	K86-689.37	146	BD Biosciences (Custom)	all	2.18
P38 pT180/Y182	36/p38	154	BD Biosciences 612289	all	3.56
FITC (for CCR7)	FIT-22	171	Biolegend 408302	NHPs	5.33
FITC (for CD62L)	FIT-22	171	Biolegend 408302	mice	8.44
FoxP3	PCH101, NRRF-30	167	Thermo Fisher 14-4776-82	primates, ice	10.55, 7.16
Supplementary Table 2.
