# Supplementary material for: A Comprehensive Atlas of Immunological Differences Between Humans, Mice, and Non-Human Primates
Source: Front Immunol. 2022 Mar 11;13:867015. doi: 10.3389/fimmu.2022.867015 (PMC8962947; doi:10.3389/fimmu.2022.867015)
Supplement: Supplementary Table 9 — Functional marker (e.g., phospho-specific antibody) medians for 10 populations for all mouse samples. [file Table_9.csv]

Supplementary Table 9 - Mouse Phospho Medians
filename	population	uniquePopulationName	parentPopulation	channel	reagent	Condition	Donor	Gender	Species	statistic	value
R35W7_MS4_Ms_F_IL-12.fcs	Neutrophils	Neutrophils	Non-Basophils	La139Di	pSTAT3	IL-12	MS4	F	Mouse	median	41.02685928
R35W7_MS4_Ms_F_IL-12.fcs	Neutrophils	Neutrophils	Non-Basophils	Nd144Di	pMAPKAPK2	IL-12	MS4	F	Mouse	median	21.57289314
R35W7_MS4_Ms_F_IL-12.fcs	Neutrophils	Neutrophils	Non-Basophils	Nd145Di	pCREB	IL-12	MS4	F	Mouse	median	53.64073181
R35W7_MS4_Ms_F_IL-12.fcs	Neutrophils	Neutrophils	Non-Basophils	Nd146Di	pPLCg2	IL-12	MS4	F	Mouse	median	10.67023945
R35W7_MS4_Ms_F_IL-12.fcs	Neutrophils	Neutrophils	Non-Basophils	Sm147Di	pSTAT1	IL-12	MS4	F	Mouse	median	4.907563686
R35W7_MS4_Ms_F_IL-12.fcs	Neutrophils	Neutrophils	Non-Basophils	Sm149Di	pSTAT5	IL-12	MS4	F	Mouse	median	10.03844738
R35W7_MS4_Ms_F_IL-12.fcs	Neutrophils	Neutrophils	Non-Basophils	Sm150Di	pS6	IL-12	MS4	F	Mouse	median	71.15994263
R35W7_MS4_Ms_F_IL-12.fcs	Neutrophils	Neutrophils	Non-Basophils	Sm152Di	pErk1/2	IL-12	MS4	F	Mouse	median	26.64437675
R35W7_MS4_Ms_F_IL-12.fcs	Neutrophils	Neutrophils	Non-Basophils	Sm154Di	pP38	IL-12	MS4	F	Mouse	median	17.44995117
R35W7_MS4_Ms_F_IL-12.fcs	Neutrophils	Neutrophils	Non-Basophils	Gd160Di	pZap70/Syk	IL-12	MS4	F	Mouse	median	5.939978123
R35W7_MS4_Ms_F_IL-12.fcs	Neutrophils	Neutrophils	Non-Basophils	Dy161Di	pTBK1	IL-12	MS4	F	Mouse	median	4.38084507
R35W7_MS4_Ms_F_IL-12.fcs	Neutrophils	Neutrophils	Non-Basophils	Ho165Di	pSTAT6	IL-12	MS4	F	Mouse	median	7.926634312
R35W7_MS4_Ms_F_IL-12.fcs	Neutrophils	Neutrophils	Non-Basophils	Er170Di	pSTAT4	IL-12	MS4	F	Mouse	median	5.267805576
R35W7_MS4_Ms_F_IL-12.fcs	Neutrophils	Neutrophils	Non-Basophils	Yb172Di	p4E-BP1	IL-12	MS4	F	Mouse	median	8.784724236
R35W7_MS4_Ms_F_IL-12.fcs	Neutrophils	Neutrophils	Non-Basophils	Tm169Di	Ki67	IL-12	MS4	F	Mouse	median	107.2981567
R35W7_MS4_Ms_F_IL-12.fcs	Neutrophils	Neutrophils	Non-Basophils	Dy163Di	IkBa	IL-12	MS4	F	Mouse	median	7.22032547
R35W7_MS4_Ms_F_IL-12.fcs	B Cells	B Cells	CD45+ CD66-	La139Di	pSTAT3	IL-12	MS4	F	Mouse	median	21.22598553
R35W7_MS4_Ms_F_IL-12.fcs	B Cells	B Cells	CD45+ CD66-	Nd144Di	pMAPKAPK2	IL-12	MS4	F	Mouse	median	7.714435577
R35W7_MS4_Ms_F_IL-12.fcs	B Cells	B Cells	CD45+ CD66-	Nd145Di	pCREB	IL-12	MS4	F	Mouse	median	33.70723724
R35W7_MS4_Ms_F_IL-12.fcs	B Cells	B Cells	CD45+ CD66-	Nd146Di	pPLCg2	IL-12	MS4	F	Mouse	median	10.81006384
R35W7_MS4_Ms_F_IL-12.fcs	B Cells	B Cells	CD45+ CD66-	Sm147Di	pSTAT1	IL-12	MS4	F	Mouse	median	7.08719039
R35W7_MS4_Ms_F_IL-12.fcs	B Cells	B Cells	CD45+ CD66-	Sm149Di	pSTAT5	IL-12	MS4	F	Mouse	median	9.103310585
R35W7_MS4_Ms_F_IL-12.fcs	B Cells	B Cells	CD45+ CD66-	Sm150Di	pS6	IL-12	MS4	F	Mouse	median	36.07717705
R35W7_MS4_Ms_F_IL-12.fcs	B Cells	B Cells	CD45+ CD66-	Sm152Di	pErk1/2	IL-12	MS4	F	Mouse	median	8.756732941
R35W7_MS4_Ms_F_IL-12.fcs	B Cells	B Cells	CD45+ CD66-	Sm154Di	pP38	IL-12	MS4	F	Mouse	median	4.465724707
R35W7_MS4_Ms_F_IL-12.fcs	B Cells	B Cells	CD45+ CD66-	Gd160Di	pZap70/Syk	IL-12	MS4	F	Mouse	median	3.791754603
R35W7_MS4_Ms_F_IL-12.fcs	B Cells	B Cells	CD45+ CD66-	Dy161Di	pTBK1	IL-12	MS4	F	Mouse	median	6.334947109
R35W7_MS4_Ms_F_IL-12.fcs	B Cells	B Cells	CD45+ CD66-	Ho165Di	pSTAT6	IL-12	MS4	F	Mouse	median	10.94952631
R35W7_MS4_Ms_F_IL-12.fcs	B Cells	B Cells	CD45+ CD66-	Er170Di	pSTAT4	IL-12	MS4	F	Mouse	median	5.930146456
R35W7_MS4_Ms_F_IL-12.fcs	B Cells	B Cells	CD45+ CD66-	Yb172Di	p4E-BP1	IL-12	MS4	F	Mouse	median	15.23247004
R35W7_MS4_Ms_F_IL-12.fcs	B Cells	B Cells	CD45+ CD66-	Tm169Di	Ki67	IL-12	MS4	F	Mouse	median	11.93981791
R35W7_MS4_Ms_F_IL-12.fcs	B Cells	B Cells	CD45+ CD66-	Dy163Di	IkBa	IL-12	MS4	F	Mouse	median	25.90900421
R35W7_MS4_Ms_F_IL-12.fcs	Mouse Basophils	Mouse Basophils	ms NK1.1-	La139Di	pSTAT3	IL-12	MS4	F	Mouse	median	17.20836258
R35W7_MS4_Ms_F_IL-12.fcs	Mouse Basophils	Mouse Basophils	ms NK1.1-	Nd144Di	pMAPKAPK2	IL-12	MS4	F	Mouse	median	15.28534317
R35W7_MS4_Ms_F_IL-12.fcs	Mouse Basophils	Mouse Basophils	ms NK1.1-	Nd145Di	pCREB	IL-12	MS4	F	Mouse	median	44.70889664
R35W7_MS4_Ms_F_IL-12.fcs	Mouse Basophils	Mouse Basophils	ms NK1.1-	Nd146Di	pPLCg2	IL-12	MS4	F	Mouse	median	7.8575387
R35W7_MS4_Ms_F_IL-12.fcs	Mouse Basophils	Mouse Basophils	ms NK1.1-	Sm147Di	pSTAT1	IL-12	MS4	F	Mouse	median	2.684010267
R35W7_MS4_Ms_F_IL-12.fcs	Mouse Basophils	Mouse Basophils	ms NK1.1-	Sm149Di	pSTAT5	IL-12	MS4	F	Mouse	median	8.896010399
R35W7_MS4_Ms_F_IL-12.fcs	Mouse Basophils	Mouse Basophils	ms NK1.1-	Sm150Di	pS6	IL-12	MS4	F	Mouse	median	39.24795532
R35W7_MS4_Ms_F_IL-12.fcs	Mouse Basophils	Mouse Basophils	ms NK1.1-	Sm152Di	pErk1/2	IL-12	MS4	F	Mouse	median	15.05970192
R35W7_MS4_Ms_F_IL-12.fcs	Mouse Basophils	Mouse Basophils	ms NK1.1-	Sm154Di	pP38	IL-12	MS4	F	Mouse	median	8.705246925
R35W7_MS4_Ms_F_IL-12.fcs	Mouse Basophils	Mouse Basophils	ms NK1.1-	Gd160Di	pZap70/Syk	IL-12	MS4	F	Mouse	median	2.668562651
R35W7_MS4_Ms_F_IL-12.fcs	Mouse Basophils	Mouse Basophils	ms NK1.1-	Dy161Di	pTBK1	IL-12	MS4	F	Mouse	median	12.79866028
R35W7_MS4_Ms_F_IL-12.fcs	Mouse Basophils	Mouse Basophils	ms NK1.1-	Ho165Di	pSTAT6	IL-12	MS4	F	Mouse	median	21.3214817
R35W7_MS4_Ms_F_IL-12.fcs	Mouse Basophils	Mouse Basophils	ms NK1.1-	Er170Di	pSTAT4	IL-12	MS4	F	Mouse	median	7.411412716
R35W7_MS4_Ms_F_IL-12.fcs	Mouse Basophils	Mouse Basophils	ms NK1.1-	Yb172Di	p4E-BP1	IL-12	MS4	F	Mouse	median	9.052910805
R35W7_MS4_Ms_F_IL-12.fcs	Mouse Basophils	Mouse Basophils	ms NK1.1-	Tm169Di	Ki67	IL-12	MS4	F	Mouse	median	188.015152
R35W7_MS4_Ms_F_IL-12.fcs	Mouse Basophils	Mouse Basophils	ms NK1.1-	Dy163Di	IkBa	IL-12	MS4	F	Mouse	median	41.07268524
R35W7_MS4_Ms_F_IL-12.fcs	ms NK1.1+/CD115-	ms NK1.1+/CD115-	CD19- CD3-	La139Di	pSTAT3	IL-12	MS4	F	Mouse	median	12.64282513
R35W7_MS4_Ms_F_IL-12.fcs	ms NK1.1+/CD115-	ms NK1.1+/CD115-	CD19- CD3-	Nd144Di	pMAPKAPK2	IL-12	MS4	F	Mouse	median	5.599097252
R35W7_MS4_Ms_F_IL-12.fcs	ms NK1.1+/CD115-	ms NK1.1+/CD115-	CD19- CD3-	Nd145Di	pCREB	IL-12	MS4	F	Mouse	median	25.882761
R35W7_MS4_Ms_F_IL-12.fcs	ms NK1.1+/CD115-	ms NK1.1+/CD115-	CD19- CD3-	Nd146Di	pPLCg2	IL-12	MS4	F	Mouse	median	7.848609924
R35W7_MS4_Ms_F_IL-12.fcs	ms NK1.1+/CD115-	ms NK1.1+/CD115-	CD19- CD3-	Sm147Di	pSTAT1	IL-12	MS4	F	Mouse	median	2.45477438
R35W7_MS4_Ms_F_IL-12.fcs	ms NK1.1+/CD115-	ms NK1.1+/CD115-	CD19- CD3-	Sm149Di	pSTAT5	IL-12	MS4	F	Mouse	median	8.3665905
R35W7_MS4_Ms_F_IL-12.fcs	ms NK1.1+/CD115-	ms NK1.1+/CD115-	CD19- CD3-	Sm150Di	pS6	IL-12	MS4	F	Mouse	median	22.55605507
R35W7_MS4_Ms_F_IL-12.fcs	ms NK1.1+/CD115-	ms NK1.1+/CD115-	CD19- CD3-	Sm152Di	pErk1/2	IL-12	MS4	F	Mouse	median	7.707057476
R35W7_MS4_Ms_F_IL-12.fcs	ms NK1.1+/CD115-	ms NK1.1+/CD115-	CD19- CD3-	Sm154Di	pP38	IL-12	MS4	F	Mouse	median	4.882486343
R35W7_MS4_Ms_F_IL-12.fcs	ms NK1.1+/CD115-	ms NK1.1+/CD115-	CD19- CD3-	Gd160Di	pZap70/Syk	IL-12	MS4	F	Mouse	median	1.987625718
R35W7_MS4_Ms_F_IL-12.fcs	ms NK1.1+/CD115-	ms NK1.1+/CD115-	CD19- CD3-	Dy161Di	pTBK1	IL-12	MS4	F	Mouse	median	4.386541843
R35W7_MS4_Ms_F_IL-12.fcs	ms NK1.1+/CD115-	ms NK1.1+/CD115-	CD19- CD3-	Ho165Di	pSTAT6	IL-12	MS4	F	Mouse	median	10.00248909
R35W7_MS4_Ms_F_IL-12.fcs	ms NK1.1+/CD115-	ms NK1.1+/CD115-	CD19- CD3-	Er170Di	pSTAT4	IL-12	MS4	F	Mouse	median	17.3307972
R35W7_MS4_Ms_F_IL-12.fcs	ms NK1.1+/CD115-	ms NK1.1+/CD115-	CD19- CD3-	Yb172Di	p4E-BP1	IL-12	MS4	F	Mouse	median	7.870872021
R35W7_MS4_Ms_F_IL-12.fcs	ms NK1.1+/CD115-	ms NK1.1+/CD115-	CD19- CD3-	Tm169Di	Ki67	IL-12	MS4	F	Mouse	median	12.29144573
R35W7_MS4_Ms_F_IL-12.fcs	ms NK1.1+/CD115-	ms NK1.1+/CD115-	CD19- CD3-	Dy163Di	IkBa	IL-12	MS4	F	Mouse	median	17.40152359
R35W7_MS4_Ms_F_IL-12.fcs	Mouse pDCs	Mouse pDCs	FcεRIα-	La139Di	pSTAT3	IL-12	MS4	F	Mouse	median	34.08451271
R35W7_MS4_Ms_F_IL-12.fcs	Mouse pDCs	Mouse pDCs	FcεRIα-	Nd144Di	pMAPKAPK2	IL-12	MS4	F	Mouse	median	9.793865681
R35W7_MS4_Ms_F_IL-12.fcs	Mouse pDCs	Mouse pDCs	FcεRIα-	Nd145Di	pCREB	IL-12	MS4	F	Mouse	median	30.43464756
R35W7_MS4_Ms_F_IL-12.fcs	Mouse pDCs	Mouse pDCs	FcεRIα-	Nd146Di	pPLCg2	IL-12	MS4	F	Mouse	median	23.3781414
R35W7_MS4_Ms_F_IL-12.fcs	Mouse pDCs	Mouse pDCs	FcεRIα-	Sm147Di	pSTAT1	IL-12	MS4	F	Mouse	median	8.87181282
R35W7_MS4_Ms_F_IL-12.fcs	Mouse pDCs	Mouse pDCs	FcεRIα-	Sm149Di	pSTAT5	IL-12	MS4	F	Mouse	median	17.34818363
R35W7_MS4_Ms_F_IL-12.fcs	Mouse pDCs	Mouse pDCs	FcεRIα-	Sm150Di	pS6	IL-12	MS4	F	Mouse	median	51.38338852
R35W7_MS4_Ms_F_IL-12.fcs	Mouse pDCs	Mouse pDCs	FcεRIα-	Sm152Di	pErk1/2	IL-12	MS4	F	Mouse	median	12.68920183
R35W7_MS4_Ms_F_IL-12.fcs	Mouse pDCs	Mouse pDCs	FcεRIα-	Sm154Di	pP38	IL-12	MS4	F	Mouse	median	5.812977314
R35W7_MS4_Ms_F_IL-12.fcs	Mouse pDCs	Mouse pDCs	FcεRIα-	Gd160Di	pZap70/Syk	IL-12	MS4	F	Mouse	median	2.793149948
R35W7_MS4_Ms_F_IL-12.fcs	Mouse pDCs	Mouse pDCs	FcεRIα-	Dy161Di	pTBK1	IL-12	MS4	F	Mouse	median	3.872751713
R35W7_MS4_Ms_F_IL-12.fcs	Mouse pDCs	Mouse pDCs	FcεRIα-	Ho165Di	pSTAT6	IL-12	MS4	F	Mouse	median	18.62564659
R35W7_MS4_Ms_F_IL-12.fcs	Mouse pDCs	Mouse pDCs	FcεRIα-	Er170Di	pSTAT4	IL-12	MS4	F	Mouse	median	5.441836119
R35W7_MS4_Ms_F_IL-12.fcs	Mouse pDCs	Mouse pDCs	FcεRIα-	Yb172Di	p4E-BP1	IL-12	MS4	F	Mouse	median	9.892950058
R35W7_MS4_Ms_F_IL-12.fcs	Mouse pDCs	Mouse pDCs	FcεRIα-	Tm169Di	Ki67	IL-12	MS4	F	Mouse	median	9.943070412
R35W7_MS4_Ms_F_IL-12.fcs	Mouse pDCs	Mouse pDCs	FcεRIα-	Dy163Di	IkBa	IL-12	MS4	F	Mouse	median	13.25071764
R35W7_MS4_Ms_F_IL-12.fcs	Mouse Ly6C+	Mouse Ly6C+	ms CD115+/NK1.1-	La139Di	pSTAT3	IL-12	MS4	F	Mouse	median	25.94426441
R35W7_MS4_Ms_F_IL-12.fcs	Mouse Ly6C+	Mouse Ly6C+	ms CD115+/NK1.1-	Nd144Di	pMAPKAPK2	IL-12	MS4	F	Mouse	median	10.86987925
R35W7_MS4_Ms_F_IL-12.fcs	Mouse Ly6C+	Mouse Ly6C+	ms CD115+/NK1.1-	Nd145Di	pCREB	IL-12	MS4	F	Mouse	median	35.83362961
R35W7_MS4_Ms_F_IL-12.fcs	Mouse Ly6C+	Mouse Ly6C+	ms CD115+/NK1.1-	Nd146Di	pPLCg2	IL-12	MS4	F	Mouse	median	11.84906006
R35W7_MS4_Ms_F_IL-12.fcs	Mouse Ly6C+	Mouse Ly6C+	ms CD115+/NK1.1-	Sm147Di	pSTAT1	IL-12	MS4	F	Mouse	median	3.923949242
R35W7_MS4_Ms_F_IL-12.fcs	Mouse Ly6C+	Mouse Ly6C+	ms CD115+/NK1.1-	Sm149Di	pSTAT5	IL-12	MS4	F	Mouse	median	18.84965897
R35W7_MS4_Ms_F_IL-12.fcs	Mouse Ly6C+	Mouse Ly6C+	ms CD115+/NK1.1-	Sm150Di	pS6	IL-12	MS4	F	Mouse	median	101.5982285
R35W7_MS4_Ms_F_IL-12.fcs	Mouse Ly6C+	Mouse Ly6C+	ms CD115+/NK1.1-	Sm152Di	pErk1/2	IL-12	MS4	F	Mouse	median	14.84366655
R35W7_MS4_Ms_F_IL-12.fcs	Mouse Ly6C+	Mouse Ly6C+	ms CD115+/NK1.1-	Sm154Di	pP38	IL-12	MS4	F	Mouse	median	7.566052914
R35W7_MS4_Ms_F_IL-12.fcs	Mouse Ly6C+	Mouse Ly6C+	ms CD115+/NK1.1-	Gd160Di	pZap70/Syk	IL-12	MS4	F	Mouse	median	2.451197028
R35W7_MS4_Ms_F_IL-12.fcs	Mouse Ly6C+	Mouse Ly6C+	ms CD115+/NK1.1-	Dy161Di	pTBK1	IL-12	MS4	F	Mouse	median	6.655076504
R35W7_MS4_Ms_F_IL-12.fcs	Mouse Ly6C+	Mouse Ly6C+	ms CD115+/NK1.1-	Ho165Di	pSTAT6	IL-12	MS4	F	Mouse	median	13.6173358
R35W7_MS4_Ms_F_IL-12.fcs	Mouse Ly6C+	Mouse Ly6C+	ms CD115+/NK1.1-	Er170Di	pSTAT4	IL-12	MS4	F	Mouse	median	6.669343948
R35W7_MS4_Ms_F_IL-12.fcs	Mouse Ly6C+	Mouse Ly6C+	ms CD115+/NK1.1-	Yb172Di	p4E-BP1	IL-12	MS4	F	Mouse	median	20.73856449
R35W7_MS4_Ms_F_IL-12.fcs	Mouse Ly6C+	Mouse Ly6C+	ms CD115+/NK1.1-	Tm169Di	Ki67	IL-12	MS4	F	Mouse	median	158.1838531
R35W7_MS4_Ms_F_IL-12.fcs	Mouse Ly6C+	Mouse Ly6C+	ms CD115+/NK1.1-	Dy163Di	IkBa	IL-12	MS4	F	Mouse	median	31.95793247
R35W7_MS4_Ms_F_IL-12.fcs	Mouse Ly6C-	Mouse Ly6C-	ms CD115+/NK1.1-	La139Di	pSTAT3	IL-12	MS4	F	Mouse	median	18.48656178
R35W7_MS4_Ms_F_IL-12.fcs	Mouse Ly6C-	Mouse Ly6C-	ms CD115+/NK1.1-	Nd144Di	pMAPKAPK2	IL-12	MS4	F	Mouse	median	8.751672745
R35W7_MS4_Ms_F_IL-12.fcs	Mouse Ly6C-	Mouse Ly6C-	ms CD115+/NK1.1-	Nd145Di	pCREB	IL-12	MS4	F	Mouse	median	42.54755592
R35W7_MS4_Ms_F_IL-12.fcs	Mouse Ly6C-	Mouse Ly6C-	ms CD115+/NK1.1-	Nd146Di	pPLCg2	IL-12	MS4	F	Mouse	median	20.54668903
R35W7_MS4_Ms_F_IL-12.fcs	Mouse Ly6C-	Mouse Ly6C-	ms CD115+/NK1.1-	Sm147Di	pSTAT1	IL-12	MS4	F	Mouse	median	2.884472728
R35W7_MS4_Ms_F_IL-12.fcs	Mouse Ly6C-	Mouse Ly6C-	ms CD115+/NK1.1-	Sm149Di	pSTAT5	IL-12	MS4	F	Mouse	median	13.47972918
R35W7_MS4_Ms_F_IL-12.fcs	Mouse Ly6C-	Mouse Ly6C-	ms CD115+/NK1.1-	Sm150Di	pS6	IL-12	MS4	F	Mouse	median	61.11224747
R35W7_MS4_Ms_F_IL-12.fcs	Mouse Ly6C-	Mouse Ly6C-	ms CD115+/NK1.1-	Sm152Di	pErk1/2	IL-12	MS4	F	Mouse	median	10.51360273
R35W7_MS4_Ms_F_IL-12.fcs	Mouse Ly6C-	Mouse Ly6C-	ms CD115+/NK1.1-	Sm154Di	pP38	IL-12	MS4	F	Mouse	median	7.303737164
R35W7_MS4_Ms_F_IL-12.fcs	Mouse Ly6C-	Mouse Ly6C-	ms CD115+/NK1.1-	Gd160Di	pZap70/Syk	IL-12	MS4	F	Mouse	median	3.272262812
R35W7_MS4_Ms_F_IL-12.fcs	Mouse Ly6C-	Mouse Ly6C-	ms CD115+/NK1.1-	Dy161Di	pTBK1	IL-12	MS4	F	Mouse	median	7.805925608
R35W7_MS4_Ms_F_IL-12.fcs	Mouse Ly6C-	Mouse Ly6C-	ms CD115+/NK1.1-	Ho165Di	pSTAT6	IL-12	MS4	F	Mouse	median	12.22178936
R35W7_MS4_Ms_F_IL-12.fcs	Mouse Ly6C-	Mouse Ly6C-	ms CD115+/NK1.1-	Er170Di	pSTAT4	IL-12	MS4	F	Mouse	median	7.133441687
R35W7_MS4_Ms_F_IL-12.fcs	Mouse Ly6C-	Mouse Ly6C-	ms CD115+/NK1.1-	Yb172Di	p4E-BP1	IL-12	MS4	F	Mouse	median	17.72777081
R35W7_MS4_Ms_F_IL-12.fcs	Mouse Ly6C-	Mouse Ly6C-	ms CD115+/NK1.1-	Tm169Di	Ki67	IL-12	MS4	F	Mouse	median	17.97217751
R35W7_MS4_Ms_F_IL-12.fcs	Mouse Ly6C-	Mouse Ly6C-	ms CD115+/NK1.1-	Dy163Di	IkBa	IL-12	MS4	F	Mouse	median	36.83533859
R35W7_MS4_Ms_F_IL-12.fcs	CD8+T cells	CD8+T cells	T Cells	La139Di	pSTAT3	IL-12	MS4	F	Mouse	median	15.64781952
R35W7_MS4_Ms_F_IL-12.fcs	CD8+T cells	CD8+T cells	T Cells	Nd144Di	pMAPKAPK2	IL-12	MS4	F	Mouse	median	7.660872459
R35W7_MS4_Ms_F_IL-12.fcs	CD8+T cells	CD8+T cells	T Cells	Nd145Di	pCREB	IL-12	MS4	F	Mouse	median	41.28404999
R35W7_MS4_Ms_F_IL-12.fcs	CD8+T cells	CD8+T cells	T Cells	Nd146Di	pPLCg2	IL-12	MS4	F	Mouse	median	10.22375202
R35W7_MS4_Ms_F_IL-12.fcs	CD8+T cells	CD8+T cells	T Cells	Sm147Di	pSTAT1	IL-12	MS4	F	Mouse	median	2.141297102
R35W7_MS4_Ms_F_IL-12.fcs	CD8+T cells	CD8+T cells	T Cells	Sm149Di	pSTAT5	IL-12	MS4	F	Mouse	median	16.22072601
R35W7_MS4_Ms_F_IL-12.fcs	CD8+T cells	CD8+T cells	T Cells	Sm150Di	pS6	IL-12	MS4	F	Mouse	median	37.3000679
R35W7_MS4_Ms_F_IL-12.fcs	CD8+T cells	CD8+T cells	T Cells	Sm152Di	pErk1/2	IL-12	MS4	F	Mouse	median	11.48585606
R35W7_MS4_Ms_F_IL-12.fcs	CD8+T cells	CD8+T cells	T Cells	Sm154Di	pP38	IL-12	MS4	F	Mouse	median	5.975108624
R35W7_MS4_Ms_F_IL-12.fcs	CD8+T cells	CD8+T cells	T Cells	Gd160Di	pZap70/Syk	IL-12	MS4	F	Mouse	median	3.458021641
R35W7_MS4_Ms_F_IL-12.fcs	CD8+T cells	CD8+T cells	T Cells	Dy161Di	pTBK1	IL-12	MS4	F	Mouse	median	4.085069656
R35W7_MS4_Ms_F_IL-12.fcs	CD8+T cells	CD8+T cells	T Cells	Ho165Di	pSTAT6	IL-12	MS4	F	Mouse	median	12.60221195
R35W7_MS4_Ms_F_IL-12.fcs	CD8+T cells	CD8+T cells	T Cells	Er170Di	pSTAT4	IL-12	MS4	F	Mouse	median	5.248125553
R35W7_MS4_Ms_F_IL-12.fcs	CD8+T cells	CD8+T cells	T Cells	Yb172Di	p4E-BP1	IL-12	MS4	F	Mouse	median	7.970209599
R35W7_MS4_Ms_F_IL-12.fcs	CD8+T cells	CD8+T cells	T Cells	Tm169Di	Ki67	IL-12	MS4	F	Mouse	median	11.92871475
R35W7_MS4_Ms_F_IL-12.fcs	CD8+T cells	CD8+T cells	T Cells	Dy163Di	IkBa	IL-12	MS4	F	Mouse	median	19.95054436
R35W7_MS4_Ms_F_IL-12.fcs	CD4+T cells	CD4+T cells	T Cells	La139Di	pSTAT3	IL-12	MS4	F	Mouse	median	15.09181547
R35W7_MS4_Ms_F_IL-12.fcs	CD4+T cells	CD4+T cells	T Cells	Nd144Di	pMAPKAPK2	IL-12	MS4	F	Mouse	median	8.225010872
R35W7_MS4_Ms_F_IL-12.fcs	CD4+T cells	CD4+T cells	T Cells	Nd145Di	pCREB	IL-12	MS4	F	Mouse	median	51.06198502
R35W7_MS4_Ms_F_IL-12.fcs	CD4+T cells	CD4+T cells	T Cells	Nd146Di	pPLCg2	IL-12	MS4	F	Mouse	median	8.576712608
R35W7_MS4_Ms_F_IL-12.fcs	CD4+T cells	CD4+T cells	T Cells	Sm147Di	pSTAT1	IL-12	MS4	F	Mouse	median	2.075837016
R35W7_MS4_Ms_F_IL-12.fcs	CD4+T cells	CD4+T cells	T Cells	Sm149Di	pSTAT5	IL-12	MS4	F	Mouse	median	13.14048052
R35W7_MS4_Ms_F_IL-12.fcs	CD4+T cells	CD4+T cells	T Cells	Sm150Di	pS6	IL-12	MS4	F	Mouse	median	34.92654228
R35W7_MS4_Ms_F_IL-12.fcs	CD4+T cells	CD4+T cells	T Cells	Sm152Di	pErk1/2	IL-12	MS4	F	Mouse	median	11.69547081
R35W7_MS4_Ms_F_IL-12.fcs	CD4+T cells	CD4+T cells	T Cells	Sm154Di	pP38	IL-12	MS4	F	Mouse	median	4.913106203
R35W7_MS4_Ms_F_IL-12.fcs	CD4+T cells	CD4+T cells	T Cells	Gd160Di	pZap70/Syk	IL-12	MS4	F	Mouse	median	3.299631357
R35W7_MS4_Ms_F_IL-12.fcs	CD4+T cells	CD4+T cells	T Cells	Dy161Di	pTBK1	IL-12	MS4	F	Mouse	median	3.883972883
R35W7_MS4_Ms_F_IL-12.fcs	CD4+T cells	CD4+T cells	T Cells	Ho165Di	pSTAT6	IL-12	MS4	F	Mouse	median	12.0537219
R35W7_MS4_Ms_F_IL-12.fcs	CD4+T cells	CD4+T cells	T Cells	Er170Di	pSTAT4	IL-12	MS4	F	Mouse	median	4.710245609
R35W7_MS4_Ms_F_IL-12.fcs	CD4+T cells	CD4+T cells	T Cells	Yb172Di	p4E-BP1	IL-12	MS4	F	Mouse	median	9.41501379
R35W7_MS4_Ms_F_IL-12.fcs	CD4+T cells	CD4+T cells	T Cells	Tm169Di	Ki67	IL-12	MS4	F	Mouse	median	10.7351284
R35W7_MS4_Ms_F_IL-12.fcs	CD4+T cells	CD4+T cells	T Cells	Dy163Di	IkBa	IL-12	MS4	F	Mouse	median	20.08554173
R35W7_MS4_Ms_F_IL-12.fcs	CD4+/CD8+	CD4+/CD8+	T Cells	La139Di	pSTAT3	IL-12	MS4	F	Mouse	median	27.26918983
R35W7_MS4_Ms_F_IL-12.fcs	CD4+/CD8+	CD4+/CD8+	T Cells	Nd144Di	pMAPKAPK2	IL-12	MS4	F	Mouse	median	13.61123466
R35W7_MS4_Ms_F_IL-12.fcs	CD4+/CD8+	CD4+/CD8+	T Cells	Nd145Di	pCREB	IL-12	MS4	F	Mouse	median	89.19748688
R35W7_MS4_Ms_F_IL-12.fcs	CD4+/CD8+	CD4+/CD8+	T Cells	Nd146Di	pPLCg2	IL-12	MS4	F	Mouse	median	17.13632393
R35W7_MS4_Ms_F_IL-12.fcs	CD4+/CD8+	CD4+/CD8+	T Cells	Sm147Di	pSTAT1	IL-12	MS4	F	Mouse	median	4.571187019
R35W7_MS4_Ms_F_IL-12.fcs	CD4+/CD8+	CD4+/CD8+	T Cells	Sm149Di	pSTAT5	IL-12	MS4	F	Mouse	median	26.83593941
R35W7_MS4_Ms_F_IL-12.fcs	CD4+/CD8+	CD4+/CD8+	T Cells	Sm150Di	pS6	IL-12	MS4	F	Mouse	median	65.47169495
R35W7_MS4_Ms_F_IL-12.fcs	CD4+/CD8+	CD4+/CD8+	T Cells	Sm152Di	pErk1/2	IL-12	MS4	F	Mouse	median	21.97545815
R35W7_MS4_Ms_F_IL-12.fcs	CD4+/CD8+	CD4+/CD8+	T Cells	Sm154Di	pP38	IL-12	MS4	F	Mouse	median	9.182704926
R35W7_MS4_Ms_F_IL-12.fcs	CD4+/CD8+	CD4+/CD8+	T Cells	Gd160Di	pZap70/Syk	IL-12	MS4	F	Mouse	median	5.772750854
R35W7_MS4_Ms_F_IL-12.fcs	CD4+/CD8+	CD4+/CD8+	T Cells	Dy161Di	pTBK1	IL-12	MS4	F	Mouse	median	6.321106911
R35W7_MS4_Ms_F_IL-12.fcs	CD4+/CD8+	CD4+/CD8+	T Cells	Ho165Di	pSTAT6	IL-12	MS4	F	Mouse	median	23.24034119
R35W7_MS4_Ms_F_IL-12.fcs	CD4+/CD8+	CD4+/CD8+	T Cells	Er170Di	pSTAT4	IL-12	MS4	F	Mouse	median	7.677562237
R35W7_MS4_Ms_F_IL-12.fcs	CD4+/CD8+	CD4+/CD8+	T Cells	Yb172Di	p4E-BP1	IL-12	MS4	F	Mouse	median	12.6390295
R35W7_MS4_Ms_F_IL-12.fcs	CD4+/CD8+	CD4+/CD8+	T Cells	Tm169Di	Ki67	IL-12	MS4	F	Mouse	median	18.99069977
R35W7_MS4_Ms_F_IL-12.fcs	CD4+/CD8+	CD4+/CD8+	T Cells	Dy163Di	IkBa	IL-12	MS4	F	Mouse	median	33.95189667
R35W7_MS4_Ms_F_IL-4.fcs	Neutrophils	Neutrophils	Non-Basophils	La139Di	pSTAT3	IL-4	MS4	F	Mouse	median	37.78684807
R35W7_MS4_Ms_F_IL-4.fcs	Neutrophils	Neutrophils	Non-Basophils	Nd144Di	pMAPKAPK2	IL-4	MS4	F	Mouse	median	20.51293755
R35W7_MS4_Ms_F_IL-4.fcs	Neutrophils	Neutrophils	Non-Basophils	Nd145Di	pCREB	IL-4	MS4	F	Mouse	median	52.54621696
R35W7_MS4_Ms_F_IL-4.fcs	Neutrophils	Neutrophils	Non-Basophils	Nd146Di	pPLCg2	IL-4	MS4	F	Mouse	median	9.450547695
R35W7_MS4_Ms_F_IL-4.fcs	Neutrophils	Neutrophils	Non-Basophils	Sm147Di	pSTAT1	IL-4	MS4	F	Mouse	median	4.824718952
R35W7_MS4_Ms_F_IL-4.fcs	Neutrophils	Neutrophils	Non-Basophils	Sm149Di	pSTAT5	IL-4	MS4	F	Mouse	median	10.2533884
R35W7_MS4_Ms_F_IL-4.fcs	Neutrophils	Neutrophils	Non-Basophils	Sm150Di	pS6	IL-4	MS4	F	Mouse	median	65.98328781
R35W7_MS4_Ms_F_IL-4.fcs	Neutrophils	Neutrophils	Non-Basophils	Sm152Di	pErk1/2	IL-4	MS4	F	Mouse	median	26.4191103
R35W7_MS4_Ms_F_IL-4.fcs	Neutrophils	Neutrophils	Non-Basophils	Sm154Di	pP38	IL-4	MS4	F	Mouse	median	17.98609447
R35W7_MS4_Ms_F_IL-4.fcs	Neutrophils	Neutrophils	Non-Basophils	Gd160Di	pZap70/Syk	IL-4	MS4	F	Mouse	median	5.476707935
R35W7_MS4_Ms_F_IL-4.fcs	Neutrophils	Neutrophils	Non-Basophils	Dy161Di	pTBK1	IL-4	MS4	F	Mouse	median	3.833276391
R35W7_MS4_Ms_F_IL-4.fcs	Neutrophils	Neutrophils	Non-Basophils	Ho165Di	pSTAT6	IL-4	MS4	F	Mouse	median	32.63710976
R35W7_MS4_Ms_F_IL-4.fcs	Neutrophils	Neutrophils	Non-Basophils	Er170Di	pSTAT4	IL-4	MS4	F	Mouse	median	4.868575811
R35W7_MS4_Ms_F_IL-4.fcs	Neutrophils	Neutrophils	Non-Basophils	Yb172Di	p4E-BP1	IL-4	MS4	F	Mouse	median	7.698678732
R35W7_MS4_Ms_F_IL-4.fcs	Neutrophils	Neutrophils	Non-Basophils	Tm169Di	Ki67	IL-4	MS4	F	Mouse	median	108.0866432
R35W7_MS4_Ms_F_IL-4.fcs	Neutrophils	Neutrophils	Non-Basophils	Dy163Di	IkBa	IL-4	MS4	F	Mouse	median	6.784476042
R35W7_MS4_Ms_F_IL-4.fcs	B Cells	B Cells	CD45+ CD66-	La139Di	pSTAT3	IL-4	MS4	F	Mouse	median	17.87830257
R35W7_MS4_Ms_F_IL-4.fcs	B Cells	B Cells	CD45+ CD66-	Nd144Di	pMAPKAPK2	IL-4	MS4	F	Mouse	median	6.13979888
R35W7_MS4_Ms_F_IL-4.fcs	B Cells	B Cells	CD45+ CD66-	Nd145Di	pCREB	IL-4	MS4	F	Mouse	median	33.79197693
R35W7_MS4_Ms_F_IL-4.fcs	B Cells	B Cells	CD45+ CD66-	Nd146Di	pPLCg2	IL-4	MS4	F	Mouse	median	8.648475647
R35W7_MS4_Ms_F_IL-4.fcs	B Cells	B Cells	CD45+ CD66-	Sm147Di	pSTAT1	IL-4	MS4	F	Mouse	median	7.901360512
R35W7_MS4_Ms_F_IL-4.fcs	B Cells	B Cells	CD45+ CD66-	Sm149Di	pSTAT5	IL-4	MS4	F	Mouse	median	8.729053974
R35W7_MS4_Ms_F_IL-4.fcs	B Cells	B Cells	CD45+ CD66-	Sm150Di	pS6	IL-4	MS4	F	Mouse	median	28.13348293
R35W7_MS4_Ms_F_IL-4.fcs	B Cells	B Cells	CD45+ CD66-	Sm152Di	pErk1/2	IL-4	MS4	F	Mouse	median	7.741965294
R35W7_MS4_Ms_F_IL-4.fcs	B Cells	B Cells	CD45+ CD66-	Sm154Di	pP38	IL-4	MS4	F	Mouse	median	4.044284105
R35W7_MS4_Ms_F_IL-4.fcs	B Cells	B Cells	CD45+ CD66-	Gd160Di	pZap70/Syk	IL-4	MS4	F	Mouse	median	2.983404279
R35W7_MS4_Ms_F_IL-4.fcs	B Cells	B Cells	CD45+ CD66-	Dy161Di	pTBK1	IL-4	MS4	F	Mouse	median	5.437075853
R35W7_MS4_Ms_F_IL-4.fcs	B Cells	B Cells	CD45+ CD66-	Ho165Di	pSTAT6	IL-4	MS4	F	Mouse	median	36.00793076
R35W7_MS4_Ms_F_IL-4.fcs	B Cells	B Cells	CD45+ CD66-	Er170Di	pSTAT4	IL-4	MS4	F	Mouse	median	5.327839851
R35W7_MS4_Ms_F_IL-4.fcs	B Cells	B Cells	CD45+ CD66-	Yb172Di	p4E-BP1	IL-4	MS4	F	Mouse	median	13.47247648
R35W7_MS4_Ms_F_IL-4.fcs	B Cells	B Cells	CD45+ CD66-	Tm169Di	Ki67	IL-4	MS4	F	Mouse	median	10.52621317
R35W7_MS4_Ms_F_IL-4.fcs	B Cells	B Cells	CD45+ CD66-	Dy163Di	IkBa	IL-4	MS4	F	Mouse	median	27.71279335
R35W7_MS4_Ms_F_IL-4.fcs	Mouse Basophils	Mouse Basophils	ms NK1.1-	La139Di	pSTAT3	IL-4	MS4	F	Mouse	median	16.74500084
R35W7_MS4_Ms_F_IL-4.fcs	Mouse Basophils	Mouse Basophils	ms NK1.1-	Nd144Di	pMAPKAPK2	IL-4	MS4	F	Mouse	median	14.00875664
R35W7_MS4_Ms_F_IL-4.fcs	Mouse Basophils	Mouse Basophils	ms NK1.1-	Nd145Di	pCREB	IL-4	MS4	F	Mouse	median	43.05683899
R35W7_MS4_Ms_F_IL-4.fcs	Mouse Basophils	Mouse Basophils	ms NK1.1-	Nd146Di	pPLCg2	IL-4	MS4	F	Mouse	median	7.633411884
R35W7_MS4_Ms_F_IL-4.fcs	Mouse Basophils	Mouse Basophils	ms NK1.1-	Sm147Di	pSTAT1	IL-4	MS4	F	Mouse	median	2.333870888
R35W7_MS4_Ms_F_IL-4.fcs	Mouse Basophils	Mouse Basophils	ms NK1.1-	Sm149Di	pSTAT5	IL-4	MS4	F	Mouse	median	7.799212456
R35W7_MS4_Ms_F_IL-4.fcs	Mouse Basophils	Mouse Basophils	ms NK1.1-	Sm150Di	pS6	IL-4	MS4	F	Mouse	median	37.63840485
R35W7_MS4_Ms_F_IL-4.fcs	Mouse Basophils	Mouse Basophils	ms NK1.1-	Sm152Di	pErk1/2	IL-4	MS4	F	Mouse	median	15.19979382
R35W7_MS4_Ms_F_IL-4.fcs	Mouse Basophils	Mouse Basophils	ms NK1.1-	Sm154Di	pP38	IL-4	MS4	F	Mouse	median	9.686574936
R35W7_MS4_Ms_F_IL-4.fcs	Mouse Basophils	Mouse Basophils	ms NK1.1-	Gd160Di	pZap70/Syk	IL-4	MS4	F	Mouse	median	1.872713208
R35W7_MS4_Ms_F_IL-4.fcs	Mouse Basophils	Mouse Basophils	ms NK1.1-	Dy161Di	pTBK1	IL-4	MS4	F	Mouse	median	13.82288361
R35W7_MS4_Ms_F_IL-4.fcs	Mouse Basophils	Mouse Basophils	ms NK1.1-	Ho165Di	pSTAT6	IL-4	MS4	F	Mouse	median	45.33835983
R35W7_MS4_Ms_F_IL-4.fcs	Mouse Basophils	Mouse Basophils	ms NK1.1-	Er170Di	pSTAT4	IL-4	MS4	F	Mouse	median	6.316955566
R35W7_MS4_Ms_F_IL-4.fcs	Mouse Basophils	Mouse Basophils	ms NK1.1-	Yb172Di	p4E-BP1	IL-4	MS4	F	Mouse	median	8.893261909
R35W7_MS4_Ms_F_IL-4.fcs	Mouse Basophils	Mouse Basophils	ms NK1.1-	Tm169Di	Ki67	IL-4	MS4	F	Mouse	median	187.6915741
R35W7_MS4_Ms_F_IL-4.fcs	Mouse Basophils	Mouse Basophils	ms NK1.1-	Dy163Di	IkBa	IL-4	MS4	F	Mouse	median	46.10503006
R35W7_MS4_Ms_F_IL-4.fcs	ms NK1.1+/CD115-	ms NK1.1+/CD115-	CD19- CD3-	La139Di	pSTAT3	IL-4	MS4	F	Mouse	median	11.44686985
R35W7_MS4_Ms_F_IL-4.fcs	ms NK1.1+/CD115-	ms NK1.1+/CD115-	CD19- CD3-	Nd144Di	pMAPKAPK2	IL-4	MS4	F	Mouse	median	5.443836927
R35W7_MS4_Ms_F_IL-4.fcs	ms NK1.1+/CD115-	ms NK1.1+/CD115-	CD19- CD3-	Nd145Di	pCREB	IL-4	MS4	F	Mouse	median	27.68201351
R35W7_MS4_Ms_F_IL-4.fcs	ms NK1.1+/CD115-	ms NK1.1+/CD115-	CD19- CD3-	Nd146Di	pPLCg2	IL-4	MS4	F	Mouse	median	7.727919817
R35W7_MS4_Ms_F_IL-4.fcs	ms NK1.1+/CD115-	ms NK1.1+/CD115-	CD19- CD3-	Sm147Di	pSTAT1	IL-4	MS4	F	Mouse	median	2.107082486
R35W7_MS4_Ms_F_IL-4.fcs	ms NK1.1+/CD115-	ms NK1.1+/CD115-	CD19- CD3-	Sm149Di	pSTAT5	IL-4	MS4	F	Mouse	median	9.12740612
R35W7_MS4_Ms_F_IL-4.fcs	ms NK1.1+/CD115-	ms NK1.1+/CD115-	CD19- CD3-	Sm150Di	pS6	IL-4	MS4	F	Mouse	median	21.35122585
R35W7_MS4_Ms_F_IL-4.fcs	ms NK1.1+/CD115-	ms NK1.1+/CD115-	CD19- CD3-	Sm152Di	pErk1/2	IL-4	MS4	F	Mouse	median	7.79528594
R35W7_MS4_Ms_F_IL-4.fcs	ms NK1.1+/CD115-	ms NK1.1+/CD115-	CD19- CD3-	Sm154Di	pP38	IL-4	MS4	F	Mouse	median	4.920167923
R35W7_MS4_Ms_F_IL-4.fcs	ms NK1.1+/CD115-	ms NK1.1+/CD115-	CD19- CD3-	Gd160Di	pZap70/Syk	IL-4	MS4	F	Mouse	median	1.817617059
R35W7_MS4_Ms_F_IL-4.fcs	ms NK1.1+/CD115-	ms NK1.1+/CD115-	CD19- CD3-	Dy161Di	pTBK1	IL-4	MS4	F	Mouse	median	4.266427755
R35W7_MS4_Ms_F_IL-4.fcs	ms NK1.1+/CD115-	ms NK1.1+/CD115-	CD19- CD3-	Ho165Di	pSTAT6	IL-4	MS4	F	Mouse	median	46.3934021
R35W7_MS4_Ms_F_IL-4.fcs	ms NK1.1+/CD115-	ms NK1.1+/CD115-	CD19- CD3-	Er170Di	pSTAT4	IL-4	MS4	F	Mouse	median	6.696100712
R35W7_MS4_Ms_F_IL-4.fcs	ms NK1.1+/CD115-	ms NK1.1+/CD115-	CD19- CD3-	Yb172Di	p4E-BP1	IL-4	MS4	F	Mouse	median	7.796168089
R35W7_MS4_Ms_F_IL-4.fcs	ms NK1.1+/CD115-	ms NK1.1+/CD115-	CD19- CD3-	Tm169Di	Ki67	IL-4	MS4	F	Mouse	median	12.2902894
R35W7_MS4_Ms_F_IL-4.fcs	ms NK1.1+/CD115-	ms NK1.1+/CD115-	CD19- CD3-	Dy163Di	IkBa	IL-4	MS4	F	Mouse	median	19.32521534
R35W7_MS4_Ms_F_IL-4.fcs	Mouse pDCs	Mouse pDCs	FcεRIα-	La139Di	pSTAT3	IL-4	MS4	F	Mouse	median	31.4049015
R35W7_MS4_Ms_F_IL-4.fcs	Mouse pDCs	Mouse pDCs	FcεRIα-	Nd144Di	pMAPKAPK2	IL-4	MS4	F	Mouse	median	12.93323469
R35W7_MS4_Ms_F_IL-4.fcs	Mouse pDCs	Mouse pDCs	FcεRIα-	Nd145Di	pCREB	IL-4	MS4	F	Mouse	median	29.98964596
R35W7_MS4_Ms_F_IL-4.fcs	Mouse pDCs	Mouse pDCs	FcεRIα-	Nd146Di	pPLCg2	IL-4	MS4	F	Mouse	median	19.48634815
R35W7_MS4_Ms_F_IL-4.fcs	Mouse pDCs	Mouse pDCs	FcεRIα-	Sm147Di	pSTAT1	IL-4	MS4	F	Mouse	median	7.560309887
R35W7_MS4_Ms_F_IL-4.fcs	Mouse pDCs	Mouse pDCs	FcεRIα-	Sm149Di	pSTAT5	IL-4	MS4	F	Mouse	median	21.76763344
R35W7_MS4_Ms_F_IL-4.fcs	Mouse pDCs	Mouse pDCs	FcεRIα-	Sm150Di	pS6	IL-4	MS4	F	Mouse	median	58.29917145
R35W7_MS4_Ms_F_IL-4.fcs	Mouse pDCs	Mouse pDCs	FcεRIα-	Sm152Di	pErk1/2	IL-4	MS4	F	Mouse	median	13.15310526
R35W7_MS4_Ms_F_IL-4.fcs	Mouse pDCs	Mouse pDCs	FcεRIα-	Sm154Di	pP38	IL-4	MS4	F	Mouse	median	6.024230242
R35W7_MS4_Ms_F_IL-4.fcs	Mouse pDCs	Mouse pDCs	FcεRIα-	Gd160Di	pZap70/Syk	IL-4	MS4	F	Mouse	median	3.388832211
R35W7_MS4_Ms_F_IL-4.fcs	Mouse pDCs	Mouse pDCs	FcεRIα-	Dy161Di	pTBK1	IL-4	MS4	F	Mouse	median	4.156936169
R35W7_MS4_Ms_F_IL-4.fcs	Mouse pDCs	Mouse pDCs	FcεRIα-	Ho165Di	pSTAT6	IL-4	MS4	F	Mouse	median	62.83738327
R35W7_MS4_Ms_F_IL-4.fcs	Mouse pDCs	Mouse pDCs	FcεRIα-	Er170Di	pSTAT4	IL-4	MS4	F	Mouse	median	7.872007608
R35W7_MS4_Ms_F_IL-4.fcs	Mouse pDCs	Mouse pDCs	FcεRIα-	Yb172Di	p4E-BP1	IL-4	MS4	F	Mouse	median	12.04868793
R35W7_MS4_Ms_F_IL-4.fcs	Mouse pDCs	Mouse pDCs	FcεRIα-	Tm169Di	Ki67	IL-4	MS4	F	Mouse	median	20.31837368
R35W7_MS4_Ms_F_IL-4.fcs	Mouse pDCs	Mouse pDCs	FcεRIα-	Dy163Di	IkBa	IL-4	MS4	F	Mouse	median	17.65879631
R35W7_MS4_Ms_F_IL-4.fcs	Mouse Ly6C+	Mouse Ly6C+	ms CD115+/NK1.1-	La139Di	pSTAT3	IL-4	MS4	F	Mouse	median	25.72766781
R35W7_MS4_Ms_F_IL-4.fcs	Mouse Ly6C+	Mouse Ly6C+	ms CD115+/NK1.1-	Nd144Di	pMAPKAPK2	IL-4	MS4	F	Mouse	median	11.00189352
R35W7_MS4_Ms_F_IL-4.fcs	Mouse Ly6C+	Mouse Ly6C+	ms CD115+/NK1.1-	Nd145Di	pCREB	IL-4	MS4	F	Mouse	median	37.30837059
R35W7_MS4_Ms_F_IL-4.fcs	Mouse Ly6C+	Mouse Ly6C+	ms CD115+/NK1.1-	Nd146Di	pPLCg2	IL-4	MS4	F	Mouse	median	11.78733206
R35W7_MS4_Ms_F_IL-4.fcs	Mouse Ly6C+	Mouse Ly6C+	ms CD115+/NK1.1-	Sm147Di	pSTAT1	IL-4	MS4	F	Mouse	median	4.478818178
R35W7_MS4_Ms_F_IL-4.fcs	Mouse Ly6C+	Mouse Ly6C+	ms CD115+/NK1.1-	Sm149Di	pSTAT5	IL-4	MS4	F	Mouse	median	21.0925703
R35W7_MS4_Ms_F_IL-4.fcs	Mouse Ly6C+	Mouse Ly6C+	ms CD115+/NK1.1-	Sm150Di	pS6	IL-4	MS4	F	Mouse	median	102.2759666
R35W7_MS4_Ms_F_IL-4.fcs	Mouse Ly6C+	Mouse Ly6C+	ms CD115+/NK1.1-	Sm152Di	pErk1/2	IL-4	MS4	F	Mouse	median	15.40198946
R35W7_MS4_Ms_F_IL-4.fcs	Mouse Ly6C+	Mouse Ly6C+	ms CD115+/NK1.1-	Sm154Di	pP38	IL-4	MS4	F	Mouse	median	8.392905235
R35W7_MS4_Ms_F_IL-4.fcs	Mouse Ly6C+	Mouse Ly6C+	ms CD115+/NK1.1-	Gd160Di	pZap70/Syk	IL-4	MS4	F	Mouse	median	2.390894294
R35W7_MS4_Ms_F_IL-4.fcs	Mouse Ly6C+	Mouse Ly6C+	ms CD115+/NK1.1-	Dy161Di	pTBK1	IL-4	MS4	F	Mouse	median	6.566306829
R35W7_MS4_Ms_F_IL-4.fcs	Mouse Ly6C+	Mouse Ly6C+	ms CD115+/NK1.1-	Ho165Di	pSTAT6	IL-4	MS4	F	Mouse	median	89.33003998
R35W7_MS4_Ms_F_IL-4.fcs	Mouse Ly6C+	Mouse Ly6C+	ms CD115+/NK1.1-	Er170Di	pSTAT4	IL-4	MS4	F	Mouse	median	7.299346924
R35W7_MS4_Ms_F_IL-4.fcs	Mouse Ly6C+	Mouse Ly6C+	ms CD115+/NK1.1-	Yb172Di	p4E-BP1	IL-4	MS4	F	Mouse	median	21.88298988
R35W7_MS4_Ms_F_IL-4.fcs	Mouse Ly6C+	Mouse Ly6C+	ms CD115+/NK1.1-	Tm169Di	Ki67	IL-4	MS4	F	Mouse	median	158.839592
R35W7_MS4_Ms_F_IL-4.fcs	Mouse Ly6C+	Mouse Ly6C+	ms CD115+/NK1.1-	Dy163Di	IkBa	IL-4	MS4	F	Mouse	median	33.98880386
R35W7_MS4_Ms_F_IL-4.fcs	Mouse Ly6C-	Mouse Ly6C-	ms CD115+/NK1.1-	La139Di	pSTAT3	IL-4	MS4	F	Mouse	median	18.35948753
R35W7_MS4_Ms_F_IL-4.fcs	Mouse Ly6C-	Mouse Ly6C-	ms CD115+/NK1.1-	Nd144Di	pMAPKAPK2	IL-4	MS4	F	Mouse	median	9.144264221
R35W7_MS4_Ms_F_IL-4.fcs	Mouse Ly6C-	Mouse Ly6C-	ms CD115+/NK1.1-	Nd145Di	pCREB	IL-4	MS4	F	Mouse	median	45.16182709
R35W7_MS4_Ms_F_IL-4.fcs	Mouse Ly6C-	Mouse Ly6C-	ms CD115+/NK1.1-	Nd146Di	pPLCg2	IL-4	MS4	F	Mouse	median	21.54899597
R35W7_MS4_Ms_F_IL-4.fcs	Mouse Ly6C-	Mouse Ly6C-	ms CD115+/NK1.1-	Sm147Di	pSTAT1	IL-4	MS4	F	Mouse	median	3.089663267
R35W7_MS4_Ms_F_IL-4.fcs	Mouse Ly6C-	Mouse Ly6C-	ms CD115+/NK1.1-	Sm149Di	pSTAT5	IL-4	MS4	F	Mouse	median	15.3625679
R35W7_MS4_Ms_F_IL-4.fcs	Mouse Ly6C-	Mouse Ly6C-	ms CD115+/NK1.1-	Sm150Di	pS6	IL-4	MS4	F	Mouse	median	60.73391724
R35W7_MS4_Ms_F_IL-4.fcs	Mouse Ly6C-	Mouse Ly6C-	ms CD115+/NK1.1-	Sm152Di	pErk1/2	IL-4	MS4	F	Mouse	median	11.0594902
R35W7_MS4_Ms_F_IL-4.fcs	Mouse Ly6C-	Mouse Ly6C-	ms CD115+/NK1.1-	Sm154Di	pP38	IL-4	MS4	F	Mouse	median	8.035310745
R35W7_MS4_Ms_F_IL-4.fcs	Mouse Ly6C-	Mouse Ly6C-	ms CD115+/NK1.1-	Gd160Di	pZap70/Syk	IL-4	MS4	F	Mouse	median	3.271636248
R35W7_MS4_Ms_F_IL-4.fcs	Mouse Ly6C-	Mouse Ly6C-	ms CD115+/NK1.1-	Dy161Di	pTBK1	IL-4	MS4	F	Mouse	median	8.328404427
R35W7_MS4_Ms_F_IL-4.fcs	Mouse Ly6C-	Mouse Ly6C-	ms CD115+/NK1.1-	Ho165Di	pSTAT6	IL-4	MS4	F	Mouse	median	81.7359314
R35W7_MS4_Ms_F_IL-4.fcs	Mouse Ly6C-	Mouse Ly6C-	ms CD115+/NK1.1-	Er170Di	pSTAT4	IL-4	MS4	F	Mouse	median	7.952342033
R35W7_MS4_Ms_F_IL-4.fcs	Mouse Ly6C-	Mouse Ly6C-	ms CD115+/NK1.1-	Yb172Di	p4E-BP1	IL-4	MS4	F	Mouse	median	20.1262207
R35W7_MS4_Ms_F_IL-4.fcs	Mouse Ly6C-	Mouse Ly6C-	ms CD115+/NK1.1-	Tm169Di	Ki67	IL-4	MS4	F	Mouse	median	18.02098083
R35W7_MS4_Ms_F_IL-4.fcs	Mouse Ly6C-	Mouse Ly6C-	ms CD115+/NK1.1-	Dy163Di	IkBa	IL-4	MS4	F	Mouse	median	38.80080032
R35W7_MS4_Ms_F_IL-4.fcs	CD8+T cells	CD8+T cells	T Cells	La139Di	pSTAT3	IL-4	MS4	F	Mouse	median	14.67227554
R35W7_MS4_Ms_F_IL-4.fcs	CD8+T cells	CD8+T cells	T Cells	Nd144Di	pMAPKAPK2	IL-4	MS4	F	Mouse	median	7.09762001
R35W7_MS4_Ms_F_IL-4.fcs	CD8+T cells	CD8+T cells	T Cells	Nd145Di	pCREB	IL-4	MS4	F	Mouse	median	40.86560059
R35W7_MS4_Ms_F_IL-4.fcs	CD8+T cells	CD8+T cells	T Cells	Nd146Di	pPLCg2	IL-4	MS4	F	Mouse	median	9.731532097
R35W7_MS4_Ms_F_IL-4.fcs	CD8+T cells	CD8+T cells	T Cells	Sm147Di	pSTAT1	IL-4	MS4	F	Mouse	median	2.381198883
R35W7_MS4_Ms_F_IL-4.fcs	CD8+T cells	CD8+T cells	T Cells	Sm149Di	pSTAT5	IL-4	MS4	F	Mouse	median	18.20771408
R35W7_MS4_Ms_F_IL-4.fcs	CD8+T cells	CD8+T cells	T Cells	Sm150Di	pS6	IL-4	MS4	F	Mouse	median	34.31721115
R35W7_MS4_Ms_F_IL-4.fcs	CD8+T cells	CD8+T cells	T Cells	Sm152Di	pErk1/2	IL-4	MS4	F	Mouse	median	11.31816387
R35W7_MS4_Ms_F_IL-4.fcs	CD8+T cells	CD8+T cells	T Cells	Sm154Di	pP38	IL-4	MS4	F	Mouse	median	6.369851112
R35W7_MS4_Ms_F_IL-4.fcs	CD8+T cells	CD8+T cells	T Cells	Gd160Di	pZap70/Syk	IL-4	MS4	F	Mouse	median	3.203729868
R35W7_MS4_Ms_F_IL-4.fcs	CD8+T cells	CD8+T cells	T Cells	Dy161Di	pTBK1	IL-4	MS4	F	Mouse	median	3.812081099
R35W7_MS4_Ms_F_IL-4.fcs	CD8+T cells	CD8+T cells	T Cells	Ho165Di	pSTAT6	IL-4	MS4	F	Mouse	median	50.7232933
R35W7_MS4_Ms_F_IL-4.fcs	CD8+T cells	CD8+T cells	T Cells	Er170Di	pSTAT4	IL-4	MS4	F	Mouse	median	5.470452309
R35W7_MS4_Ms_F_IL-4.fcs	CD8+T cells	CD8+T cells	T Cells	Yb172Di	p4E-BP1	IL-4	MS4	F	Mouse	median	7.622570992
R35W7_MS4_Ms_F_IL-4.fcs	CD8+T cells	CD8+T cells	T Cells	Tm169Di	Ki67	IL-4	MS4	F	Mouse	median	11.23307896
R35W7_MS4_Ms_F_IL-4.fcs	CD8+T cells	CD8+T cells	T Cells	Dy163Di	IkBa	IL-4	MS4	F	Mouse	median	20.74909592
R35W7_MS4_Ms_F_IL-4.fcs	CD4+T cells	CD4+T cells	T Cells	La139Di	pSTAT3	IL-4	MS4	F	Mouse	median	14.02516079
R35W7_MS4_Ms_F_IL-4.fcs	CD4+T cells	CD4+T cells	T Cells	Nd144Di	pMAPKAPK2	IL-4	MS4	F	Mouse	median	7.642476082
R35W7_MS4_Ms_F_IL-4.fcs	CD4+T cells	CD4+T cells	T Cells	Nd145Di	pCREB	IL-4	MS4	F	Mouse	median	51.50248337
R35W7_MS4_Ms_F_IL-4.fcs	CD4+T cells	CD4+T cells	T Cells	Nd146Di	pPLCg2	IL-4	MS4	F	Mouse	median	7.990806103
R35W7_MS4_Ms_F_IL-4.fcs	CD4+T cells	CD4+T cells	T Cells	Sm147Di	pSTAT1	IL-4	MS4	F	Mouse	median	2.323474646
R35W7_MS4_Ms_F_IL-4.fcs	CD4+T cells	CD4+T cells	T Cells	Sm149Di	pSTAT5	IL-4	MS4	F	Mouse	median	14.29331017
R35W7_MS4_Ms_F_IL-4.fcs	CD4+T cells	CD4+T cells	T Cells	Sm150Di	pS6	IL-4	MS4	F	Mouse	median	31.9732151
R35W7_MS4_Ms_F_IL-4.fcs	CD4+T cells	CD4+T cells	T Cells	Sm152Di	pErk1/2	IL-4	MS4	F	Mouse	median	11.35235596
R35W7_MS4_Ms_F_IL-4.fcs	CD4+T cells	CD4+T cells	T Cells	Sm154Di	pP38	IL-4	MS4	F	Mouse	median	5.263375282
R35W7_MS4_Ms_F_IL-4.fcs	CD4+T cells	CD4+T cells	T Cells	Gd160Di	pZap70/Syk	IL-4	MS4	F	Mouse	median	3.073730707
R35W7_MS4_Ms_F_IL-4.fcs	CD4+T cells	CD4+T cells	T Cells	Dy161Di	pTBK1	IL-4	MS4	F	Mouse	median	3.590736628
R35W7_MS4_Ms_F_IL-4.fcs	CD4+T cells	CD4+T cells	T Cells	Ho165Di	pSTAT6	IL-4	MS4	F	Mouse	median	47.32084274
R35W7_MS4_Ms_F_IL-4.fcs	CD4+T cells	CD4+T cells	T Cells	Er170Di	pSTAT4	IL-4	MS4	F	Mouse	median	4.720294476
R35W7_MS4_Ms_F_IL-4.fcs	CD4+T cells	CD4+T cells	T Cells	Yb172Di	p4E-BP1	IL-4	MS4	F	Mouse	median	8.881708145
R35W7_MS4_Ms_F_IL-4.fcs	CD4+T cells	CD4+T cells	T Cells	Tm169Di	Ki67	IL-4	MS4	F	Mouse	median	10.04891682
R35W7_MS4_Ms_F_IL-4.fcs	CD4+T cells	CD4+T cells	T Cells	Dy163Di	IkBa	IL-4	MS4	F	Mouse	median	20.52746391
R35W7_MS4_Ms_F_IL-4.fcs	CD4+/CD8+	CD4+/CD8+	T Cells	La139Di	pSTAT3	IL-4	MS4	F	Mouse	median	25.23785973
R35W7_MS4_Ms_F_IL-4.fcs	CD4+/CD8+	CD4+/CD8+	T Cells	Nd144Di	pMAPKAPK2	IL-4	MS4	F	Mouse	median	12.45053196
R35W7_MS4_Ms_F_IL-4.fcs	CD4+/CD8+	CD4+/CD8+	T Cells	Nd145Di	pCREB	IL-4	MS4	F	Mouse	median	85.37753677
R35W7_MS4_Ms_F_IL-4.fcs	CD4+/CD8+	CD4+/CD8+	T Cells	Nd146Di	pPLCg2	IL-4	MS4	F	Mouse	median	16.15084362
R35W7_MS4_Ms_F_IL-4.fcs	CD4+/CD8+	CD4+/CD8+	T Cells	Sm147Di	pSTAT1	IL-4	MS4	F	Mouse	median	4.669797659
R35W7_MS4_Ms_F_IL-4.fcs	CD4+/CD8+	CD4+/CD8+	T Cells	Sm149Di	pSTAT5	IL-4	MS4	F	Mouse	median	25.90391064
R35W7_MS4_Ms_F_IL-4.fcs	CD4+/CD8+	CD4+/CD8+	T Cells	Sm150Di	pS6	IL-4	MS4	F	Mouse	median	59.71922874
R35W7_MS4_Ms_F_IL-4.fcs	CD4+/CD8+	CD4+/CD8+	T Cells	Sm152Di	pErk1/2	IL-4	MS4	F	Mouse	median	20.59905052
R35W7_MS4_Ms_F_IL-4.fcs	CD4+/CD8+	CD4+/CD8+	T Cells	Sm154Di	pP38	IL-4	MS4	F	Mouse	median	10.1277132
R35W7_MS4_Ms_F_IL-4.fcs	CD4+/CD8+	CD4+/CD8+	T Cells	Gd160Di	pZap70/Syk	IL-4	MS4	F	Mouse	median	5.041520357
R35W7_MS4_Ms_F_IL-4.fcs	CD4+/CD8+	CD4+/CD8+	T Cells	Dy161Di	pTBK1	IL-4	MS4	F	Mouse	median	5.559044361
R35W7_MS4_Ms_F_IL-4.fcs	CD4+/CD8+	CD4+/CD8+	T Cells	Ho165Di	pSTAT6	IL-4	MS4	F	Mouse	median	72.41090393
R35W7_MS4_Ms_F_IL-4.fcs	CD4+/CD8+	CD4+/CD8+	T Cells	Er170Di	pSTAT4	IL-4	MS4	F	Mouse	median	7.481152773
R35W7_MS4_Ms_F_IL-4.fcs	CD4+/CD8+	CD4+/CD8+	T Cells	Yb172Di	p4E-BP1	IL-4	MS4	F	Mouse	median	12.81711817
R35W7_MS4_Ms_F_IL-4.fcs	CD4+/CD8+	CD4+/CD8+	T Cells	Tm169Di	Ki67	IL-4	MS4	F	Mouse	median	19.99877644
R35W7_MS4_Ms_F_IL-4.fcs	CD4+/CD8+	CD4+/CD8+	T Cells	Dy163Di	IkBa	IL-4	MS4	F	Mouse	median	35.32237244
R35W9_MS5_Ms_M_Basal.fcs	Neutrophils	Neutrophils	Non-Basophils	La139Di	pSTAT3	Basal	MS5	M	Mouse	median	40.89383507
R35W9_MS5_Ms_M_Basal.fcs	Neutrophils	Neutrophils	Non-Basophils	Nd144Di	pMAPKAPK2	Basal	MS5	M	Mouse	median	10.87781096
R35W9_MS5_Ms_M_Basal.fcs	Neutrophils	Neutrophils	Non-Basophils	Nd145Di	pCREB	Basal	MS5	M	Mouse	median	35.1774044
R35W9_MS5_Ms_M_Basal.fcs	Neutrophils	Neutrophils	Non-Basophils	Nd146Di	pPLCg2	Basal	MS5	M	Mouse	median	8.07432127
R35W9_MS5_Ms_M_Basal.fcs	Neutrophils	Neutrophils	Non-Basophils	Sm147Di	pSTAT1	Basal	MS5	M	Mouse	median	4.443618298
R35W9_MS5_Ms_M_Basal.fcs	Neutrophils	Neutrophils	Non-Basophils	Sm149Di	pSTAT5	Basal	MS5	M	Mouse	median	7.690286875
R35W9_MS5_Ms_M_Basal.fcs	Neutrophils	Neutrophils	Non-Basophils	Sm150Di	pS6	Basal	MS5	M	Mouse	median	57.64903069
R35W9_MS5_Ms_M_Basal.fcs	Neutrophils	Neutrophils	Non-Basophils	Sm152Di	pErk1/2	Basal	MS5	M	Mouse	median	21.25371933
R35W9_MS5_Ms_M_Basal.fcs	Neutrophils	Neutrophils	Non-Basophils	Sm154Di	pP38	Basal	MS5	M	Mouse	median	5.391098022
R35W9_MS5_Ms_M_Basal.fcs	Neutrophils	Neutrophils	Non-Basophils	Gd160Di	pZap70/Syk	Basal	MS5	M	Mouse	median	4.447081089
R35W9_MS5_Ms_M_Basal.fcs	Neutrophils	Neutrophils	Non-Basophils	Dy161Di	pTBK1	Basal	MS5	M	Mouse	median	2.126966119
R35W9_MS5_Ms_M_Basal.fcs	Neutrophils	Neutrophils	Non-Basophils	Ho165Di	pSTAT6	Basal	MS5	M	Mouse	median	4.227242708
R35W9_MS5_Ms_M_Basal.fcs	Neutrophils	Neutrophils	Non-Basophils	Er170Di	pSTAT4	Basal	MS5	M	Mouse	median	2.721854568
R35W9_MS5_Ms_M_Basal.fcs	Neutrophils	Neutrophils	Non-Basophils	Yb172Di	p4E-BP1	Basal	MS5	M	Mouse	median	4.805342197
R35W9_MS5_Ms_M_Basal.fcs	Neutrophils	Neutrophils	Non-Basophils	Tm169Di	Ki67	Basal	MS5	M	Mouse	median	50.04262924
R35W9_MS5_Ms_M_Basal.fcs	Neutrophils	Neutrophils	Non-Basophils	Dy163Di	IkBa	Basal	MS5	M	Mouse	median	3.577392697
R35W9_MS5_Ms_M_Basal.fcs	B Cells	B Cells	CD45+ CD66-	La139Di	pSTAT3	Basal	MS5	M	Mouse	median	20.17368221
R35W9_MS5_Ms_M_Basal.fcs	B Cells	B Cells	CD45+ CD66-	Nd144Di	pMAPKAPK2	Basal	MS5	M	Mouse	median	4.77618289
R35W9_MS5_Ms_M_Basal.fcs	B Cells	B Cells	CD45+ CD66-	Nd145Di	pCREB	Basal	MS5	M	Mouse	median	25.4858675
R35W9_MS5_Ms_M_Basal.fcs	B Cells	B Cells	CD45+ CD66-	Nd146Di	pPLCg2	Basal	MS5	M	Mouse	median	6.745534182
R35W9_MS5_Ms_M_Basal.fcs	B Cells	B Cells	CD45+ CD66-	Sm147Di	pSTAT1	Basal	MS5	M	Mouse	median	5.924957037
R35W9_MS5_Ms_M_Basal.fcs	B Cells	B Cells	CD45+ CD66-	Sm149Di	pSTAT5	Basal	MS5	M	Mouse	median	6.233713865
R35W9_MS5_Ms_M_Basal.fcs	B Cells	B Cells	CD45+ CD66-	Sm150Di	pS6	Basal	MS5	M	Mouse	median	28.49819374
R35W9_MS5_Ms_M_Basal.fcs	B Cells	B Cells	CD45+ CD66-	Sm152Di	pErk1/2	Basal	MS5	M	Mouse	median	6.578938484
R35W9_MS5_Ms_M_Basal.fcs	B Cells	B Cells	CD45+ CD66-	Sm154Di	pP38	Basal	MS5	M	Mouse	median	3.092076063
R35W9_MS5_Ms_M_Basal.fcs	B Cells	B Cells	CD45+ CD66-	Gd160Di	pZap70/Syk	Basal	MS5	M	Mouse	median	2.181371093
R35W9_MS5_Ms_M_Basal.fcs	B Cells	B Cells	CD45+ CD66-	Dy161Di	pTBK1	Basal	MS5	M	Mouse	median	4.24867177
R35W9_MS5_Ms_M_Basal.fcs	B Cells	B Cells	CD45+ CD66-	Ho165Di	pSTAT6	Basal	MS5	M	Mouse	median	9.174575329
R35W9_MS5_Ms_M_Basal.fcs	B Cells	B Cells	CD45+ CD66-	Er170Di	pSTAT4	Basal	MS5	M	Mouse	median	3.722172499
R35W9_MS5_Ms_M_Basal.fcs	B Cells	B Cells	CD45+ CD66-	Yb172Di	p4E-BP1	Basal	MS5	M	Mouse	median	10.65790462
R35W9_MS5_Ms_M_Basal.fcs	B Cells	B Cells	CD45+ CD66-	Tm169Di	Ki67	Basal	MS5	M	Mouse	median	8.565682888
R35W9_MS5_Ms_M_Basal.fcs	B Cells	B Cells	CD45+ CD66-	Dy163Di	IkBa	Basal	MS5	M	Mouse	median	24.20528412
R35W9_MS5_Ms_M_Basal.fcs	Mouse Basophils	Mouse Basophils	ms NK1.1-	La139Di	pSTAT3	Basal	MS5	M	Mouse	median	17.09722328
R35W9_MS5_Ms_M_Basal.fcs	Mouse Basophils	Mouse Basophils	ms NK1.1-	Nd144Di	pMAPKAPK2	Basal	MS5	M	Mouse	median	11.21413231
R35W9_MS5_Ms_M_Basal.fcs	Mouse Basophils	Mouse Basophils	ms NK1.1-	Nd145Di	pCREB	Basal	MS5	M	Mouse	median	35.60221863
R35W9_MS5_Ms_M_Basal.fcs	Mouse Basophils	Mouse Basophils	ms NK1.1-	Nd146Di	pPLCg2	Basal	MS5	M	Mouse	median	6.213772774
R35W9_MS5_Ms_M_Basal.fcs	Mouse Basophils	Mouse Basophils	ms NK1.1-	Sm147Di	pSTAT1	Basal	MS5	M	Mouse	median	2.538328648
R35W9_MS5_Ms_M_Basal.fcs	Mouse Basophils	Mouse Basophils	ms NK1.1-	Sm149Di	pSTAT5	Basal	MS5	M	Mouse	median	6.487000465
R35W9_MS5_Ms_M_Basal.fcs	Mouse Basophils	Mouse Basophils	ms NK1.1-	Sm150Di	pS6	Basal	MS5	M	Mouse	median	32.51961899
R35W9_MS5_Ms_M_Basal.fcs	Mouse Basophils	Mouse Basophils	ms NK1.1-	Sm152Di	pErk1/2	Basal	MS5	M	Mouse	median	12.32031155
R35W9_MS5_Ms_M_Basal.fcs	Mouse Basophils	Mouse Basophils	ms NK1.1-	Sm154Di	pP38	Basal	MS5	M	Mouse	median	6.026888371
R35W9_MS5_Ms_M_Basal.fcs	Mouse Basophils	Mouse Basophils	ms NK1.1-	Gd160Di	pZap70/Syk	Basal	MS5	M	Mouse	median	2.142826319
R35W9_MS5_Ms_M_Basal.fcs	Mouse Basophils	Mouse Basophils	ms NK1.1-	Dy161Di	pTBK1	Basal	MS5	M	Mouse	median	12.06315994
R35W9_MS5_Ms_M_Basal.fcs	Mouse Basophils	Mouse Basophils	ms NK1.1-	Ho165Di	pSTAT6	Basal	MS5	M	Mouse	median	17.44613457
R35W9_MS5_Ms_M_Basal.fcs	Mouse Basophils	Mouse Basophils	ms NK1.1-	Er170Di	pSTAT4	Basal	MS5	M	Mouse	median	4.338247776
R35W9_MS5_Ms_M_Basal.fcs	Mouse Basophils	Mouse Basophils	ms NK1.1-	Yb172Di	p4E-BP1	Basal	MS5	M	Mouse	median	6.964467525
R35W9_MS5_Ms_M_Basal.fcs	Mouse Basophils	Mouse Basophils	ms NK1.1-	Tm169Di	Ki67	Basal	MS5	M	Mouse	median	114.1587143
R35W9_MS5_Ms_M_Basal.fcs	Mouse Basophils	Mouse Basophils	ms NK1.1-	Dy163Di	IkBa	Basal	MS5	M	Mouse	median	38.49872208
R35W9_MS5_Ms_M_Basal.fcs	ms NK1.1+/CD115-	ms NK1.1+/CD115-	CD19- CD3-	La139Di	pSTAT3	Basal	MS5	M	Mouse	median	11.12992859
R35W9_MS5_Ms_M_Basal.fcs	ms NK1.1+/CD115-	ms NK1.1+/CD115-	CD19- CD3-	Nd144Di	pMAPKAPK2	Basal	MS5	M	Mouse	median	4.619143963
R35W9_MS5_Ms_M_Basal.fcs	ms NK1.1+/CD115-	ms NK1.1+/CD115-	CD19- CD3-	Nd145Di	pCREB	Basal	MS5	M	Mouse	median	21.47458076
R35W9_MS5_Ms_M_Basal.fcs	ms NK1.1+/CD115-	ms NK1.1+/CD115-	CD19- CD3-	Nd146Di	pPLCg2	Basal	MS5	M	Mouse	median	6.395307064
R35W9_MS5_Ms_M_Basal.fcs	ms NK1.1+/CD115-	ms NK1.1+/CD115-	CD19- CD3-	Sm147Di	pSTAT1	Basal	MS5	M	Mouse	median	2.054104567
R35W9_MS5_Ms_M_Basal.fcs	ms NK1.1+/CD115-	ms NK1.1+/CD115-	CD19- CD3-	Sm149Di	pSTAT5	Basal	MS5	M	Mouse	median	7.301987648
R35W9_MS5_Ms_M_Basal.fcs	ms NK1.1+/CD115-	ms NK1.1+/CD115-	CD19- CD3-	Sm150Di	pS6	Basal	MS5	M	Mouse	median	22.84308434
R35W9_MS5_Ms_M_Basal.fcs	ms NK1.1+/CD115-	ms NK1.1+/CD115-	CD19- CD3-	Sm152Di	pErk1/2	Basal	MS5	M	Mouse	median	7.156273842
R35W9_MS5_Ms_M_Basal.fcs	ms NK1.1+/CD115-	ms NK1.1+/CD115-	CD19- CD3-	Sm154Di	pP38	Basal	MS5	M	Mouse	median	3.141665936
R35W9_MS5_Ms_M_Basal.fcs	ms NK1.1+/CD115-	ms NK1.1+/CD115-	CD19- CD3-	Gd160Di	pZap70/Syk	Basal	MS5	M	Mouse	median	1.476269364
R35W9_MS5_Ms_M_Basal.fcs	ms NK1.1+/CD115-	ms NK1.1+/CD115-	CD19- CD3-	Dy161Di	pTBK1	Basal	MS5	M	Mouse	median	3.461574078
R35W9_MS5_Ms_M_Basal.fcs	ms NK1.1+/CD115-	ms NK1.1+/CD115-	CD19- CD3-	Ho165Di	pSTAT6	Basal	MS5	M	Mouse	median	10.54517937
R35W9_MS5_Ms_M_Basal.fcs	ms NK1.1+/CD115-	ms NK1.1+/CD115-	CD19- CD3-	Er170Di	pSTAT4	Basal	MS5	M	Mouse	median	4.675163746
R35W9_MS5_Ms_M_Basal.fcs	ms NK1.1+/CD115-	ms NK1.1+/CD115-	CD19- CD3-	Yb172Di	p4E-BP1	Basal	MS5	M	Mouse	median	5.626622677
R35W9_MS5_Ms_M_Basal.fcs	ms NK1.1+/CD115-	ms NK1.1+/CD115-	CD19- CD3-	Tm169Di	Ki67	Basal	MS5	M	Mouse	median	11.60059834
R35W9_MS5_Ms_M_Basal.fcs	ms NK1.1+/CD115-	ms NK1.1+/CD115-	CD19- CD3-	Dy163Di	IkBa	Basal	MS5	M	Mouse	median	17.96884727
R35W9_MS5_Ms_M_Basal.fcs	Mouse pDCs	Mouse pDCs	FcεRIα-	La139Di	pSTAT3	Basal	MS5	M	Mouse	median	38.13779259
R35W9_MS5_Ms_M_Basal.fcs	Mouse pDCs	Mouse pDCs	FcεRIα-	Nd144Di	pMAPKAPK2	Basal	MS5	M	Mouse	median	7.105226994
R35W9_MS5_Ms_M_Basal.fcs	Mouse pDCs	Mouse pDCs	FcεRIα-	Nd145Di	pCREB	Basal	MS5	M	Mouse	median	22.58137798
R35W9_MS5_Ms_M_Basal.fcs	Mouse pDCs	Mouse pDCs	FcεRIα-	Nd146Di	pPLCg2	Basal	MS5	M	Mouse	median	14.89261818
R35W9_MS5_Ms_M_Basal.fcs	Mouse pDCs	Mouse pDCs	FcεRIα-	Sm147Di	pSTAT1	Basal	MS5	M	Mouse	median	5.046416521
R35W9_MS5_Ms_M_Basal.fcs	Mouse pDCs	Mouse pDCs	FcεRIα-	Sm149Di	pSTAT5	Basal	MS5	M	Mouse	median	10.52649117
R35W9_MS5_Ms_M_Basal.fcs	Mouse pDCs	Mouse pDCs	FcεRIα-	Sm150Di	pS6	Basal	MS5	M	Mouse	median	56.40975571
R35W9_MS5_Ms_M_Basal.fcs	Mouse pDCs	Mouse pDCs	FcεRIα-	Sm152Di	pErk1/2	Basal	MS5	M	Mouse	median	11.43283224
R35W9_MS5_Ms_M_Basal.fcs	Mouse pDCs	Mouse pDCs	FcεRIα-	Sm154Di	pP38	Basal	MS5	M	Mouse	median	4.143339396
R35W9_MS5_Ms_M_Basal.fcs	Mouse pDCs	Mouse pDCs	FcεRIα-	Gd160Di	pZap70/Syk	Basal	MS5	M	Mouse	median	2.118075371
R35W9_MS5_Ms_M_Basal.fcs	Mouse pDCs	Mouse pDCs	FcεRIα-	Dy161Di	pTBK1	Basal	MS5	M	Mouse	median	2.801376581
R35W9_MS5_Ms_M_Basal.fcs	Mouse pDCs	Mouse pDCs	FcεRIα-	Ho165Di	pSTAT6	Basal	MS5	M	Mouse	median	15.9597497
R35W9_MS5_Ms_M_Basal.fcs	Mouse pDCs	Mouse pDCs	FcεRIα-	Er170Di	pSTAT4	Basal	MS5	M	Mouse	median	3.42051971
R35W9_MS5_Ms_M_Basal.fcs	Mouse pDCs	Mouse pDCs	FcεRIα-	Yb172Di	p4E-BP1	Basal	MS5	M	Mouse	median	7.340752363
R35W9_MS5_Ms_M_Basal.fcs	Mouse pDCs	Mouse pDCs	FcεRIα-	Tm169Di	Ki67	Basal	MS5	M	Mouse	median	11.23219728
R35W9_MS5_Ms_M_Basal.fcs	Mouse pDCs	Mouse pDCs	FcεRIα-	Dy163Di	IkBa	Basal	MS5	M	Mouse	median	10.27450418
R35W9_MS5_Ms_M_Basal.fcs	Mouse Ly6C+	Mouse Ly6C+	ms CD115+/NK1.1-	La139Di	pSTAT3	Basal	MS5	M	Mouse	median	24.80578995
R35W9_MS5_Ms_M_Basal.fcs	Mouse Ly6C+	Mouse Ly6C+	ms CD115+/NK1.1-	Nd144Di	pMAPKAPK2	Basal	MS5	M	Mouse	median	7.902393579
R35W9_MS5_Ms_M_Basal.fcs	Mouse Ly6C+	Mouse Ly6C+	ms CD115+/NK1.1-	Nd145Di	pCREB	Basal	MS5	M	Mouse	median	24.03801823
R35W9_MS5_Ms_M_Basal.fcs	Mouse Ly6C+	Mouse Ly6C+	ms CD115+/NK1.1-	Nd146Di	pPLCg2	Basal	MS5	M	Mouse	median	8.77739048
R35W9_MS5_Ms_M_Basal.fcs	Mouse Ly6C+	Mouse Ly6C+	ms CD115+/NK1.1-	Sm147Di	pSTAT1	Basal	MS5	M	Mouse	median	3.524343729
R35W9_MS5_Ms_M_Basal.fcs	Mouse Ly6C+	Mouse Ly6C+	ms CD115+/NK1.1-	Sm149Di	pSTAT5	Basal	MS5	M	Mouse	median	13.12957907
R35W9_MS5_Ms_M_Basal.fcs	Mouse Ly6C+	Mouse Ly6C+	ms CD115+/NK1.1-	Sm150Di	pS6	Basal	MS5	M	Mouse	median	67.05144501
R35W9_MS5_Ms_M_Basal.fcs	Mouse Ly6C+	Mouse Ly6C+	ms CD115+/NK1.1-	Sm152Di	pErk1/2	Basal	MS5	M	Mouse	median	11.4952383
R35W9_MS5_Ms_M_Basal.fcs	Mouse Ly6C+	Mouse Ly6C+	ms CD115+/NK1.1-	Sm154Di	pP38	Basal	MS5	M	Mouse	median	4.337457895
R35W9_MS5_Ms_M_Basal.fcs	Mouse Ly6C+	Mouse Ly6C+	ms CD115+/NK1.1-	Gd160Di	pZap70/Syk	Basal	MS5	M	Mouse	median	1.710686743
R35W9_MS5_Ms_M_Basal.fcs	Mouse Ly6C+	Mouse Ly6C+	ms CD115+/NK1.1-	Dy161Di	pTBK1	Basal	MS5	M	Mouse	median	5.180402994
R35W9_MS5_Ms_M_Basal.fcs	Mouse Ly6C+	Mouse Ly6C+	ms CD115+/NK1.1-	Ho165Di	pSTAT6	Basal	MS5	M	Mouse	median	11.7179842
R35W9_MS5_Ms_M_Basal.fcs	Mouse Ly6C+	Mouse Ly6C+	ms CD115+/NK1.1-	Er170Di	pSTAT4	Basal	MS5	M	Mouse	median	4.158611774
R35W9_MS5_Ms_M_Basal.fcs	Mouse Ly6C+	Mouse Ly6C+	ms CD115+/NK1.1-	Yb172Di	p4E-BP1	Basal	MS5	M	Mouse	median	15.72501278
R35W9_MS5_Ms_M_Basal.fcs	Mouse Ly6C+	Mouse Ly6C+	ms CD115+/NK1.1-	Tm169Di	Ki67	Basal	MS5	M	Mouse	median	119.939537
R35W9_MS5_Ms_M_Basal.fcs	Mouse Ly6C+	Mouse Ly6C+	ms CD115+/NK1.1-	Dy163Di	IkBa	Basal	MS5	M	Mouse	median	33.21606064
R35W9_MS5_Ms_M_Basal.fcs	Mouse Ly6C-	Mouse Ly6C-	ms CD115+/NK1.1-	La139Di	pSTAT3	Basal	MS5	M	Mouse	median	16.81946087
R35W9_MS5_Ms_M_Basal.fcs	Mouse Ly6C-	Mouse Ly6C-	ms CD115+/NK1.1-	Nd144Di	pMAPKAPK2	Basal	MS5	M	Mouse	median	6.836712837
R35W9_MS5_Ms_M_Basal.fcs	Mouse Ly6C-	Mouse Ly6C-	ms CD115+/NK1.1-	Nd145Di	pCREB	Basal	MS5	M	Mouse	median	29.80894852
R35W9_MS5_Ms_M_Basal.fcs	Mouse Ly6C-	Mouse Ly6C-	ms CD115+/NK1.1-	Nd146Di	pPLCg2	Basal	MS5	M	Mouse	median	14.94115448
R35W9_MS5_Ms_M_Basal.fcs	Mouse Ly6C-	Mouse Ly6C-	ms CD115+/NK1.1-	Sm147Di	pSTAT1	Basal	MS5	M	Mouse	median	2.490187287
R35W9_MS5_Ms_M_Basal.fcs	Mouse Ly6C-	Mouse Ly6C-	ms CD115+/NK1.1-	Sm149Di	pSTAT5	Basal	MS5	M	Mouse	median	9.980234623
R35W9_MS5_Ms_M_Basal.fcs	Mouse Ly6C-	Mouse Ly6C-	ms CD115+/NK1.1-	Sm150Di	pS6	Basal	MS5	M	Mouse	median	47.49724007
R35W9_MS5_Ms_M_Basal.fcs	Mouse Ly6C-	Mouse Ly6C-	ms CD115+/NK1.1-	Sm152Di	pErk1/2	Basal	MS5	M	Mouse	median	9.085635662
R35W9_MS5_Ms_M_Basal.fcs	Mouse Ly6C-	Mouse Ly6C-	ms CD115+/NK1.1-	Sm154Di	pP38	Basal	MS5	M	Mouse	median	4.391885519
R35W9_MS5_Ms_M_Basal.fcs	Mouse Ly6C-	Mouse Ly6C-	ms CD115+/NK1.1-	Gd160Di	pZap70/Syk	Basal	MS5	M	Mouse	median	2.450934649
R35W9_MS5_Ms_M_Basal.fcs	Mouse Ly6C-	Mouse Ly6C-	ms CD115+/NK1.1-	Dy161Di	pTBK1	Basal	MS5	M	Mouse	median	6.472195387
R35W9_MS5_Ms_M_Basal.fcs	Mouse Ly6C-	Mouse Ly6C-	ms CD115+/NK1.1-	Ho165Di	pSTAT6	Basal	MS5	M	Mouse	median	10.59225082
R35W9_MS5_Ms_M_Basal.fcs	Mouse Ly6C-	Mouse Ly6C-	ms CD115+/NK1.1-	Er170Di	pSTAT4	Basal	MS5	M	Mouse	median	4.848468781
R35W9_MS5_Ms_M_Basal.fcs	Mouse Ly6C-	Mouse Ly6C-	ms CD115+/NK1.1-	Yb172Di	p4E-BP1	Basal	MS5	M	Mouse	median	13.88903046
R35W9_MS5_Ms_M_Basal.fcs	Mouse Ly6C-	Mouse Ly6C-	ms CD115+/NK1.1-	Tm169Di	Ki67	Basal	MS5	M	Mouse	median	14.13478184
R35W9_MS5_Ms_M_Basal.fcs	Mouse Ly6C-	Mouse Ly6C-	ms CD115+/NK1.1-	Dy163Di	IkBa	Basal	MS5	M	Mouse	median	34.09828568
R35W9_MS5_Ms_M_Basal.fcs	CD8+T cells	CD8+T cells	T Cells	La139Di	pSTAT3	Basal	MS5	M	Mouse	median	14.86552143
R35W9_MS5_Ms_M_Basal.fcs	CD8+T cells	CD8+T cells	T Cells	Nd144Di	pMAPKAPK2	Basal	MS5	M	Mouse	median	5.598227024
R35W9_MS5_Ms_M_Basal.fcs	CD8+T cells	CD8+T cells	T Cells	Nd145Di	pCREB	Basal	MS5	M	Mouse	median	28.04758263
R35W9_MS5_Ms_M_Basal.fcs	CD8+T cells	CD8+T cells	T Cells	Nd146Di	pPLCg2	Basal	MS5	M	Mouse	median	7.885089636
R35W9_MS5_Ms_M_Basal.fcs	CD8+T cells	CD8+T cells	T Cells	Sm147Di	pSTAT1	Basal	MS5	M	Mouse	median	1.959807634
R35W9_MS5_Ms_M_Basal.fcs	CD8+T cells	CD8+T cells	T Cells	Sm149Di	pSTAT5	Basal	MS5	M	Mouse	median	12.08103037
R35W9_MS5_Ms_M_Basal.fcs	CD8+T cells	CD8+T cells	T Cells	Sm150Di	pS6	Basal	MS5	M	Mouse	median	37.78318024
R35W9_MS5_Ms_M_Basal.fcs	CD8+T cells	CD8+T cells	T Cells	Sm152Di	pErk1/2	Basal	MS5	M	Mouse	median	10.23350763
R35W9_MS5_Ms_M_Basal.fcs	CD8+T cells	CD8+T cells	T Cells	Sm154Di	pP38	Basal	MS5	M	Mouse	median	5.126066208
R35W9_MS5_Ms_M_Basal.fcs	CD8+T cells	CD8+T cells	T Cells	Gd160Di	pZap70/Syk	Basal	MS5	M	Mouse	median	2.620380163
R35W9_MS5_Ms_M_Basal.fcs	CD8+T cells	CD8+T cells	T Cells	Dy161Di	pTBK1	Basal	MS5	M	Mouse	median	2.679804444
R35W9_MS5_Ms_M_Basal.fcs	CD8+T cells	CD8+T cells	T Cells	Ho165Di	pSTAT6	Basal	MS5	M	Mouse	median	10.61485577
R35W9_MS5_Ms_M_Basal.fcs	CD8+T cells	CD8+T cells	T Cells	Er170Di	pSTAT4	Basal	MS5	M	Mouse	median	3.740997672
R35W9_MS5_Ms_M_Basal.fcs	CD8+T cells	CD8+T cells	T Cells	Yb172Di	p4E-BP1	Basal	MS5	M	Mouse	median	4.736094236
R35W9_MS5_Ms_M_Basal.fcs	CD8+T cells	CD8+T cells	T Cells	Tm169Di	Ki67	Basal	MS5	M	Mouse	median	9.037071228
R35W9_MS5_Ms_M_Basal.fcs	CD8+T cells	CD8+T cells	T Cells	Dy163Di	IkBa	Basal	MS5	M	Mouse	median	17.72931576
R35W9_MS5_Ms_M_Basal.fcs	CD4+T cells	CD4+T cells	T Cells	La139Di	pSTAT3	Basal	MS5	M	Mouse	median	14.66946459
R35W9_MS5_Ms_M_Basal.fcs	CD4+T cells	CD4+T cells	T Cells	Nd144Di	pMAPKAPK2	Basal	MS5	M	Mouse	median	5.922562361
R35W9_MS5_Ms_M_Basal.fcs	CD4+T cells	CD4+T cells	T Cells	Nd145Di	pCREB	Basal	MS5	M	Mouse	median	35.30051422
R35W9_MS5_Ms_M_Basal.fcs	CD4+T cells	CD4+T cells	T Cells	Nd146Di	pPLCg2	Basal	MS5	M	Mouse	median	6.368975639
R35W9_MS5_Ms_M_Basal.fcs	CD4+T cells	CD4+T cells	T Cells	Sm147Di	pSTAT1	Basal	MS5	M	Mouse	median	1.870015323
R35W9_MS5_Ms_M_Basal.fcs	CD4+T cells	CD4+T cells	T Cells	Sm149Di	pSTAT5	Basal	MS5	M	Mouse	median	9.567622662
R35W9_MS5_Ms_M_Basal.fcs	CD4+T cells	CD4+T cells	T Cells	Sm150Di	pS6	Basal	MS5	M	Mouse	median	33.79810524
R35W9_MS5_Ms_M_Basal.fcs	CD4+T cells	CD4+T cells	T Cells	Sm152Di	pErk1/2	Basal	MS5	M	Mouse	median	10.3781209
R35W9_MS5_Ms_M_Basal.fcs	CD4+T cells	CD4+T cells	T Cells	Sm154Di	pP38	Basal	MS5	M	Mouse	median	4.183793783
R35W9_MS5_Ms_M_Basal.fcs	CD4+T cells	CD4+T cells	T Cells	Gd160Di	pZap70/Syk	Basal	MS5	M	Mouse	median	2.651954293
R35W9_MS5_Ms_M_Basal.fcs	CD4+T cells	CD4+T cells	T Cells	Dy161Di	pTBK1	Basal	MS5	M	Mouse	median	2.446524382
R35W9_MS5_Ms_M_Basal.fcs	CD4+T cells	CD4+T cells	T Cells	Ho165Di	pSTAT6	Basal	MS5	M	Mouse	median	10.09909964
R35W9_MS5_Ms_M_Basal.fcs	CD4+T cells	CD4+T cells	T Cells	Er170Di	pSTAT4	Basal	MS5	M	Mouse	median	3.261840224
R35W9_MS5_Ms_M_Basal.fcs	CD4+T cells	CD4+T cells	T Cells	Yb172Di	p4E-BP1	Basal	MS5	M	Mouse	median	6.476828575
R35W9_MS5_Ms_M_Basal.fcs	CD4+T cells	CD4+T cells	T Cells	Tm169Di	Ki67	Basal	MS5	M	Mouse	median	8.352427959
R35W9_MS5_Ms_M_Basal.fcs	CD4+T cells	CD4+T cells	T Cells	Dy163Di	IkBa	Basal	MS5	M	Mouse	median	17.88838196
R35W9_MS5_Ms_M_Basal.fcs	CD4+/CD8+	CD4+/CD8+	T Cells	La139Di	pSTAT3	Basal	MS5	M	Mouse	median	25.33301163
R35W9_MS5_Ms_M_Basal.fcs	CD4+/CD8+	CD4+/CD8+	T Cells	Nd144Di	pMAPKAPK2	Basal	MS5	M	Mouse	median	7.410202503
R35W9_MS5_Ms_M_Basal.fcs	CD4+/CD8+	CD4+/CD8+	T Cells	Nd145Di	pCREB	Basal	MS5	M	Mouse	median	70.74565506
R35W9_MS5_Ms_M_Basal.fcs	CD4+/CD8+	CD4+/CD8+	T Cells	Nd146Di	pPLCg2	Basal	MS5	M	Mouse	median	11.33752251
R35W9_MS5_Ms_M_Basal.fcs	CD4+/CD8+	CD4+/CD8+	T Cells	Sm147Di	pSTAT1	Basal	MS5	M	Mouse	median	3.448464155
R35W9_MS5_Ms_M_Basal.fcs	CD4+/CD8+	CD4+/CD8+	T Cells	Sm149Di	pSTAT5	Basal	MS5	M	Mouse	median	16.56321096
R35W9_MS5_Ms_M_Basal.fcs	CD4+/CD8+	CD4+/CD8+	T Cells	Sm150Di	pS6	Basal	MS5	M	Mouse	median	60.63796425
R35W9_MS5_Ms_M_Basal.fcs	CD4+/CD8+	CD4+/CD8+	T Cells	Sm152Di	pErk1/2	Basal	MS5	M	Mouse	median	21.23570061
R35W9_MS5_Ms_M_Basal.fcs	CD4+/CD8+	CD4+/CD8+	T Cells	Sm154Di	pP38	Basal	MS5	M	Mouse	median	8.099061489
R35W9_MS5_Ms_M_Basal.fcs	CD4+/CD8+	CD4+/CD8+	T Cells	Gd160Di	pZap70/Syk	Basal	MS5	M	Mouse	median	4.123927116
R35W9_MS5_Ms_M_Basal.fcs	CD4+/CD8+	CD4+/CD8+	T Cells	Dy161Di	pTBK1	Basal	MS5	M	Mouse	median	3.479899406
R35W9_MS5_Ms_M_Basal.fcs	CD4+/CD8+	CD4+/CD8+	T Cells	Ho165Di	pSTAT6	Basal	MS5	M	Mouse	median	13.7375288
R35W9_MS5_Ms_M_Basal.fcs	CD4+/CD8+	CD4+/CD8+	T Cells	Er170Di	pSTAT4	Basal	MS5	M	Mouse	median	3.881175399
R35W9_MS5_Ms_M_Basal.fcs	CD4+/CD8+	CD4+/CD8+	T Cells	Yb172Di	p4E-BP1	Basal	MS5	M	Mouse	median	8.113794088
R35W9_MS5_Ms_M_Basal.fcs	CD4+/CD8+	CD4+/CD8+	T Cells	Tm169Di	Ki67	Basal	MS5	M	Mouse	median	10.44495583
R35W9_MS5_Ms_M_Basal.fcs	CD4+/CD8+	CD4+/CD8+	T Cells	Dy163Di	IkBa	Basal	MS5	M	Mouse	median	30.20815563
R35W9_MS5_Ms_M_IFNa2.fcs	Neutrophils	Neutrophils	Non-Basophils	La139Di	pSTAT3	IFNa2	MS5	M	Mouse	median	39.13167
R35W9_MS5_Ms_M_IFNa2.fcs	Neutrophils	Neutrophils	Non-Basophils	Nd144Di	pMAPKAPK2	IFNa2	MS5	M	Mouse	median	10.33434916
R35W9_MS5_Ms_M_IFNa2.fcs	Neutrophils	Neutrophils	Non-Basophils	Nd145Di	pCREB	IFNa2	MS5	M	Mouse	median	35.01978302
R35W9_MS5_Ms_M_IFNa2.fcs	Neutrophils	Neutrophils	Non-Basophils	Nd146Di	pPLCg2	IFNa2	MS5	M	Mouse	median	8.063049316
R35W9_MS5_Ms_M_IFNa2.fcs	Neutrophils	Neutrophils	Non-Basophils	Sm147Di	pSTAT1	IFNa2	MS5	M	Mouse	median	6.058728695
R35W9_MS5_Ms_M_IFNa2.fcs	Neutrophils	Neutrophils	Non-Basophils	Sm149Di	pSTAT5	IFNa2	MS5	M	Mouse	median	7.332761526
R35W9_MS5_Ms_M_IFNa2.fcs	Neutrophils	Neutrophils	Non-Basophils	Sm150Di	pS6	IFNa2	MS5	M	Mouse	median	56.02276039
R35W9_MS5_Ms_M_IFNa2.fcs	Neutrophils	Neutrophils	Non-Basophils	Sm152Di	pErk1/2	IFNa2	MS5	M	Mouse	median	20.83634377
R35W9_MS5_Ms_M_IFNa2.fcs	Neutrophils	Neutrophils	Non-Basophils	Sm154Di	pP38	IFNa2	MS5	M	Mouse	median	5.345725775
R35W9_MS5_Ms_M_IFNa2.fcs	Neutrophils	Neutrophils	Non-Basophils	Gd160Di	pZap70/Syk	IFNa2	MS5	M	Mouse	median	4.415795326
R35W9_MS5_Ms_M_IFNa2.fcs	Neutrophils	Neutrophils	Non-Basophils	Dy161Di	pTBK1	IFNa2	MS5	M	Mouse	median	1.940538108
R35W9_MS5_Ms_M_IFNa2.fcs	Neutrophils	Neutrophils	Non-Basophils	Ho165Di	pSTAT6	IFNa2	MS5	M	Mouse	median	4.157426119
R35W9_MS5_Ms_M_IFNa2.fcs	Neutrophils	Neutrophils	Non-Basophils	Er170Di	pSTAT4	IFNa2	MS5	M	Mouse	median	2.618396521
R35W9_MS5_Ms_M_IFNa2.fcs	Neutrophils	Neutrophils	Non-Basophils	Yb172Di	p4E-BP1	IFNa2	MS5	M	Mouse	median	4.673697948
R35W9_MS5_Ms_M_IFNa2.fcs	Neutrophils	Neutrophils	Non-Basophils	Tm169Di	Ki67	IFNa2	MS5	M	Mouse	median	46.63642883
R35W9_MS5_Ms_M_IFNa2.fcs	Neutrophils	Neutrophils	Non-Basophils	Dy163Di	IkBa	IFNa2	MS5	M	Mouse	median	3.983979821
R35W9_MS5_Ms_M_IFNa2.fcs	B Cells	B Cells	CD45+ CD66-	La139Di	pSTAT3	IFNa2	MS5	M	Mouse	median	19.49999523
R35W9_MS5_Ms_M_IFNa2.fcs	B Cells	B Cells	CD45+ CD66-	Nd144Di	pMAPKAPK2	IFNa2	MS5	M	Mouse	median	4.461380482
R35W9_MS5_Ms_M_IFNa2.fcs	B Cells	B Cells	CD45+ CD66-	Nd145Di	pCREB	IFNa2	MS5	M	Mouse	median	25.93131638
R35W9_MS5_Ms_M_IFNa2.fcs	B Cells	B Cells	CD45+ CD66-	Nd146Di	pPLCg2	IFNa2	MS5	M	Mouse	median	6.54318881
R35W9_MS5_Ms_M_IFNa2.fcs	B Cells	B Cells	CD45+ CD66-	Sm147Di	pSTAT1	IFNa2	MS5	M	Mouse	median	7.132025957
R35W9_MS5_Ms_M_IFNa2.fcs	B Cells	B Cells	CD45+ CD66-	Sm149Di	pSTAT5	IFNa2	MS5	M	Mouse	median	6.154472113
R35W9_MS5_Ms_M_IFNa2.fcs	B Cells	B Cells	CD45+ CD66-	Sm150Di	pS6	IFNa2	MS5	M	Mouse	median	27.08678055
R35W9_MS5_Ms_M_IFNa2.fcs	B Cells	B Cells	CD45+ CD66-	Sm152Di	pErk1/2	IFNa2	MS5	M	Mouse	median	6.439068079
R35W9_MS5_Ms_M_IFNa2.fcs	B Cells	B Cells	CD45+ CD66-	Sm154Di	pP38	IFNa2	MS5	M	Mouse	median	3.007652283
R35W9_MS5_Ms_M_IFNa2.fcs	B Cells	B Cells	CD45+ CD66-	Gd160Di	pZap70/Syk	IFNa2	MS5	M	Mouse	median	2.072967768
R35W9_MS5_Ms_M_IFNa2.fcs	B Cells	B Cells	CD45+ CD66-	Dy161Di	pTBK1	IFNa2	MS5	M	Mouse	median	4.148941278
R35W9_MS5_Ms_M_IFNa2.fcs	B Cells	B Cells	CD45+ CD66-	Ho165Di	pSTAT6	IFNa2	MS5	M	Mouse	median	9.058078766
R35W9_MS5_Ms_M_IFNa2.fcs	B Cells	B Cells	CD45+ CD66-	Er170Di	pSTAT4	IFNa2	MS5	M	Mouse	median	3.863813519
R35W9_MS5_Ms_M_IFNa2.fcs	B Cells	B Cells	CD45+ CD66-	Yb172Di	p4E-BP1	IFNa2	MS5	M	Mouse	median	10.1609416
R35W9_MS5_Ms_M_IFNa2.fcs	B Cells	B Cells	CD45+ CD66-	Tm169Di	Ki67	IFNa2	MS5	M	Mouse	median	8.317281723
R35W9_MS5_Ms_M_IFNa2.fcs	B Cells	B Cells	CD45+ CD66-	Dy163Di	IkBa	IFNa2	MS5	M	Mouse	median	23.84503269
R35W9_MS5_Ms_M_IFNa2.fcs	Mouse Basophils	Mouse Basophils	ms NK1.1-	La139Di	pSTAT3	IFNa2	MS5	M	Mouse	median	16.51602077
R35W9_MS5_Ms_M_IFNa2.fcs	Mouse Basophils	Mouse Basophils	ms NK1.1-	Nd144Di	pMAPKAPK2	IFNa2	MS5	M	Mouse	median	10.78202343
R35W9_MS5_Ms_M_IFNa2.fcs	Mouse Basophils	Mouse Basophils	ms NK1.1-	Nd145Di	pCREB	IFNa2	MS5	M	Mouse	median	41.0052166
R35W9_MS5_Ms_M_IFNa2.fcs	Mouse Basophils	Mouse Basophils	ms NK1.1-	Nd146Di	pPLCg2	IFNa2	MS5	M	Mouse	median	6.01791501
R35W9_MS5_Ms_M_IFNa2.fcs	Mouse Basophils	Mouse Basophils	ms NK1.1-	Sm147Di	pSTAT1	IFNa2	MS5	M	Mouse	median	2.971215248
R35W9_MS5_Ms_M_IFNa2.fcs	Mouse Basophils	Mouse Basophils	ms NK1.1-	Sm149Di	pSTAT5	IFNa2	MS5	M	Mouse	median	6.303950787
R35W9_MS5_Ms_M_IFNa2.fcs	Mouse Basophils	Mouse Basophils	ms NK1.1-	Sm150Di	pS6	IFNa2	MS5	M	Mouse	median	32.28783417
R35W9_MS5_Ms_M_IFNa2.fcs	Mouse Basophils	Mouse Basophils	ms NK1.1-	Sm152Di	pErk1/2	IFNa2	MS5	M	Mouse	median	12.10249901
R35W9_MS5_Ms_M_IFNa2.fcs	Mouse Basophils	Mouse Basophils	ms NK1.1-	Sm154Di	pP38	IFNa2	MS5	M	Mouse	median	6.375300407
R35W9_MS5_Ms_M_IFNa2.fcs	Mouse Basophils	Mouse Basophils	ms NK1.1-	Gd160Di	pZap70/Syk	IFNa2	MS5	M	Mouse	median	1.985529065
R35W9_MS5_Ms_M_IFNa2.fcs	Mouse Basophils	Mouse Basophils	ms NK1.1-	Dy161Di	pTBK1	IFNa2	MS5	M	Mouse	median	11.88284111
R35W9_MS5_Ms_M_IFNa2.fcs	Mouse Basophils	Mouse Basophils	ms NK1.1-	Ho165Di	pSTAT6	IFNa2	MS5	M	Mouse	median	16.76711559
R35W9_MS5_Ms_M_IFNa2.fcs	Mouse Basophils	Mouse Basophils	ms NK1.1-	Er170Di	pSTAT4	IFNa2	MS5	M	Mouse	median	4.374765396
R35W9_MS5_Ms_M_IFNa2.fcs	Mouse Basophils	Mouse Basophils	ms NK1.1-	Yb172Di	p4E-BP1	IFNa2	MS5	M	Mouse	median	6.399330854
R35W9_MS5_Ms_M_IFNa2.fcs	Mouse Basophils	Mouse Basophils	ms NK1.1-	Tm169Di	Ki67	IFNa2	MS5	M	Mouse	median	131.429184
R35W9_MS5_Ms_M_IFNa2.fcs	Mouse Basophils	Mouse Basophils	ms NK1.1-	Dy163Di	IkBa	IFNa2	MS5	M	Mouse	median	37.72036934
R35W9_MS5_Ms_M_IFNa2.fcs	ms NK1.1+/CD115-	ms NK1.1+/CD115-	CD19- CD3-	La139Di	pSTAT3	IFNa2	MS5	M	Mouse	median	10.60216045
R35W9_MS5_Ms_M_IFNa2.fcs	ms NK1.1+/CD115-	ms NK1.1+/CD115-	CD19- CD3-	Nd144Di	pMAPKAPK2	IFNa2	MS5	M	Mouse	median	4.287532568
R35W9_MS5_Ms_M_IFNa2.fcs	ms NK1.1+/CD115-	ms NK1.1+/CD115-	CD19- CD3-	Nd145Di	pCREB	IFNa2	MS5	M	Mouse	median	21.0403204
R35W9_MS5_Ms_M_IFNa2.fcs	ms NK1.1+/CD115-	ms NK1.1+/CD115-	CD19- CD3-	Nd146Di	pPLCg2	IFNa2	MS5	M	Mouse	median	6.233036995
R35W9_MS5_Ms_M_IFNa2.fcs	ms NK1.1+/CD115-	ms NK1.1+/CD115-	CD19- CD3-	Sm147Di	pSTAT1	IFNa2	MS5	M	Mouse	median	2.223889351
R35W9_MS5_Ms_M_IFNa2.fcs	ms NK1.1+/CD115-	ms NK1.1+/CD115-	CD19- CD3-	Sm149Di	pSTAT5	IFNa2	MS5	M	Mouse	median	7.059519053
R35W9_MS5_Ms_M_IFNa2.fcs	ms NK1.1+/CD115-	ms NK1.1+/CD115-	CD19- CD3-	Sm150Di	pS6	IFNa2	MS5	M	Mouse	median	21.54626369
R35W9_MS5_Ms_M_IFNa2.fcs	ms NK1.1+/CD115-	ms NK1.1+/CD115-	CD19- CD3-	Sm152Di	pErk1/2	IFNa2	MS5	M	Mouse	median	6.661049366
R35W9_MS5_Ms_M_IFNa2.fcs	ms NK1.1+/CD115-	ms NK1.1+/CD115-	CD19- CD3-	Sm154Di	pP38	IFNa2	MS5	M	Mouse	median	3.124875188
R35W9_MS5_Ms_M_IFNa2.fcs	ms NK1.1+/CD115-	ms NK1.1+/CD115-	CD19- CD3-	Gd160Di	pZap70/Syk	IFNa2	MS5	M	Mouse	median	1.326155841
R35W9_MS5_Ms_M_IFNa2.fcs	ms NK1.1+/CD115-	ms NK1.1+/CD115-	CD19- CD3-	Dy161Di	pTBK1	IFNa2	MS5	M	Mouse	median	3.154596925
R35W9_MS5_Ms_M_IFNa2.fcs	ms NK1.1+/CD115-	ms NK1.1+/CD115-	CD19- CD3-	Ho165Di	pSTAT6	IFNa2	MS5	M	Mouse	median	9.808683395
R35W9_MS5_Ms_M_IFNa2.fcs	ms NK1.1+/CD115-	ms NK1.1+/CD115-	CD19- CD3-	Er170Di	pSTAT4	IFNa2	MS5	M	Mouse	median	5.476353645
R35W9_MS5_Ms_M_IFNa2.fcs	ms NK1.1+/CD115-	ms NK1.1+/CD115-	CD19- CD3-	Yb172Di	p4E-BP1	IFNa2	MS5	M	Mouse	median	5.44106245
R35W9_MS5_Ms_M_IFNa2.fcs	ms NK1.1+/CD115-	ms NK1.1+/CD115-	CD19- CD3-	Tm169Di	Ki67	IFNa2	MS5	M	Mouse	median	11.09088182
R35W9_MS5_Ms_M_IFNa2.fcs	ms NK1.1+/CD115-	ms NK1.1+/CD115-	CD19- CD3-	Dy163Di	IkBa	IFNa2	MS5	M	Mouse	median	17.34068871
R35W9_MS5_Ms_M_IFNa2.fcs	Mouse pDCs	Mouse pDCs	FcεRIα-	La139Di	pSTAT3	IFNa2	MS5	M	Mouse	median	45.66126633
R35W9_MS5_Ms_M_IFNa2.fcs	Mouse pDCs	Mouse pDCs	FcεRIα-	Nd144Di	pMAPKAPK2	IFNa2	MS5	M	Mouse	median	10.19365311
R35W9_MS5_Ms_M_IFNa2.fcs	Mouse pDCs	Mouse pDCs	FcεRIα-	Nd145Di	pCREB	IFNa2	MS5	M	Mouse	median	25.39231873
R35W9_MS5_Ms_M_IFNa2.fcs	Mouse pDCs	Mouse pDCs	FcεRIα-	Nd146Di	pPLCg2	IFNa2	MS5	M	Mouse	median	16.62500763
R35W9_MS5_Ms_M_IFNa2.fcs	Mouse pDCs	Mouse pDCs	FcεRIα-	Sm147Di	pSTAT1	IFNa2	MS5	M	Mouse	median	18.65790749
R35W9_MS5_Ms_M_IFNa2.fcs	Mouse pDCs	Mouse pDCs	FcεRIα-	Sm149Di	pSTAT5	IFNa2	MS5	M	Mouse	median	14.0263567
R35W9_MS5_Ms_M_IFNa2.fcs	Mouse pDCs	Mouse pDCs	FcεRIα-	Sm150Di	pS6	IFNa2	MS5	M	Mouse	median	54.64498138
R35W9_MS5_Ms_M_IFNa2.fcs	Mouse pDCs	Mouse pDCs	FcεRIα-	Sm152Di	pErk1/2	IFNa2	MS5	M	Mouse	median	12.9864254
R35W9_MS5_Ms_M_IFNa2.fcs	Mouse pDCs	Mouse pDCs	FcεRIα-	Sm154Di	pP38	IFNa2	MS5	M	Mouse	median	4.350997925
R35W9_MS5_Ms_M_IFNa2.fcs	Mouse pDCs	Mouse pDCs	FcεRIα-	Gd160Di	pZap70/Syk	IFNa2	MS5	M	Mouse	median	2.897255659
R35W9_MS5_Ms_M_IFNa2.fcs	Mouse pDCs	Mouse pDCs	FcεRIα-	Dy161Di	pTBK1	IFNa2	MS5	M	Mouse	median	2.957628489
R35W9_MS5_Ms_M_IFNa2.fcs	Mouse pDCs	Mouse pDCs	FcεRIα-	Ho165Di	pSTAT6	IFNa2	MS5	M	Mouse	median	23.4503231
R35W9_MS5_Ms_M_IFNa2.fcs	Mouse pDCs	Mouse pDCs	FcεRIα-	Er170Di	pSTAT4	IFNa2	MS5	M	Mouse	median	4.717170238
R35W9_MS5_Ms_M_IFNa2.fcs	Mouse pDCs	Mouse pDCs	FcεRIα-	Yb172Di	p4E-BP1	IFNa2	MS5	M	Mouse	median	6.059519768
R35W9_MS5_Ms_M_IFNa2.fcs	Mouse pDCs	Mouse pDCs	FcεRIα-	Tm169Di	Ki67	IFNa2	MS5	M	Mouse	median	18.99775696
R35W9_MS5_Ms_M_IFNa2.fcs	Mouse pDCs	Mouse pDCs	FcεRIα-	Dy163Di	IkBa	IFNa2	MS5	M	Mouse	median	10.49388695
R35W9_MS5_Ms_M_IFNa2.fcs	Mouse Ly6C+	Mouse Ly6C+	ms CD115+/NK1.1-	La139Di	pSTAT3	IFNa2	MS5	M	Mouse	median	24.90550423
R35W9_MS5_Ms_M_IFNa2.fcs	Mouse Ly6C+	Mouse Ly6C+	ms CD115+/NK1.1-	Nd144Di	pMAPKAPK2	IFNa2	MS5	M	Mouse	median	7.514006615
R35W9_MS5_Ms_M_IFNa2.fcs	Mouse Ly6C+	Mouse Ly6C+	ms CD115+/NK1.1-	Nd145Di	pCREB	IFNa2	MS5	M	Mouse	median	25.9685154
R35W9_MS5_Ms_M_IFNa2.fcs	Mouse Ly6C+	Mouse Ly6C+	ms CD115+/NK1.1-	Nd146Di	pPLCg2	IFNa2	MS5	M	Mouse	median	8.895962715
R35W9_MS5_Ms_M_IFNa2.fcs	Mouse Ly6C+	Mouse Ly6C+	ms CD115+/NK1.1-	Sm147Di	pSTAT1	IFNa2	MS5	M	Mouse	median	6.841249943
R35W9_MS5_Ms_M_IFNa2.fcs	Mouse Ly6C+	Mouse Ly6C+	ms CD115+/NK1.1-	Sm149Di	pSTAT5	IFNa2	MS5	M	Mouse	median	15.28075218
R35W9_MS5_Ms_M_IFNa2.fcs	Mouse Ly6C+	Mouse Ly6C+	ms CD115+/NK1.1-	Sm150Di	pS6	IFNa2	MS5	M	Mouse	median	68.58366394
R35W9_MS5_Ms_M_IFNa2.fcs	Mouse Ly6C+	Mouse Ly6C+	ms CD115+/NK1.1-	Sm152Di	pErk1/2	IFNa2	MS5	M	Mouse	median	11.75243378
R35W9_MS5_Ms_M_IFNa2.fcs	Mouse Ly6C+	Mouse Ly6C+	ms CD115+/NK1.1-	Sm154Di	pP38	IFNa2	MS5	M	Mouse	median	4.177193165
R35W9_MS5_Ms_M_IFNa2.fcs	Mouse Ly6C+	Mouse Ly6C+	ms CD115+/NK1.1-	Gd160Di	pZap70/Syk	IFNa2	MS5	M	Mouse	median	1.707643867
R35W9_MS5_Ms_M_IFNa2.fcs	Mouse Ly6C+	Mouse Ly6C+	ms CD115+/NK1.1-	Dy161Di	pTBK1	IFNa2	MS5	M	Mouse	median	5.333709717
R35W9_MS5_Ms_M_IFNa2.fcs	Mouse Ly6C+	Mouse Ly6C+	ms CD115+/NK1.1-	Ho165Di	pSTAT6	IFNa2	MS5	M	Mouse	median	12.96163368
R35W9_MS5_Ms_M_IFNa2.fcs	Mouse Ly6C+	Mouse Ly6C+	ms CD115+/NK1.1-	Er170Di	pSTAT4	IFNa2	MS5	M	Mouse	median	4.181849003
R35W9_MS5_Ms_M_IFNa2.fcs	Mouse Ly6C+	Mouse Ly6C+	ms CD115+/NK1.1-	Yb172Di	p4E-BP1	IFNa2	MS5	M	Mouse	median	15.62665462
R35W9_MS5_Ms_M_IFNa2.fcs	Mouse Ly6C+	Mouse Ly6C+	ms CD115+/NK1.1-	Tm169Di	Ki67	IFNa2	MS5	M	Mouse	median	115.1911545
R35W9_MS5_Ms_M_IFNa2.fcs	Mouse Ly6C+	Mouse Ly6C+	ms CD115+/NK1.1-	Dy163Di	IkBa	IFNa2	MS5	M	Mouse	median	32.31930542
R35W9_MS5_Ms_M_IFNa2.fcs	Mouse Ly6C-	Mouse Ly6C-	ms CD115+/NK1.1-	La139Di	pSTAT3	IFNa2	MS5	M	Mouse	median	16.48107529
R35W9_MS5_Ms_M_IFNa2.fcs	Mouse Ly6C-	Mouse Ly6C-	ms CD115+/NK1.1-	Nd144Di	pMAPKAPK2	IFNa2	MS5	M	Mouse	median	6.637609005
R35W9_MS5_Ms_M_IFNa2.fcs	Mouse Ly6C-	Mouse Ly6C-	ms CD115+/NK1.1-	Nd145Di	pCREB	IFNa2	MS5	M	Mouse	median	29.19562149
R35W9_MS5_Ms_M_IFNa2.fcs	Mouse Ly6C-	Mouse Ly6C-	ms CD115+/NK1.1-	Nd146Di	pPLCg2	IFNa2	MS5	M	Mouse	median	14.4592247
R35W9_MS5_Ms_M_IFNa2.fcs	Mouse Ly6C-	Mouse Ly6C-	ms CD115+/NK1.1-	Sm147Di	pSTAT1	IFNa2	MS5	M	Mouse	median	3.545800447
R35W9_MS5_Ms_M_IFNa2.fcs	Mouse Ly6C-	Mouse Ly6C-	ms CD115+/NK1.1-	Sm149Di	pSTAT5	IFNa2	MS5	M	Mouse	median	10.25044727
R35W9_MS5_Ms_M_IFNa2.fcs	Mouse Ly6C-	Mouse Ly6C-	ms CD115+/NK1.1-	Sm150Di	pS6	IFNa2	MS5	M	Mouse	median	47.2480011
R35W9_MS5_Ms_M_IFNa2.fcs	Mouse Ly6C-	Mouse Ly6C-	ms CD115+/NK1.1-	Sm152Di	pErk1/2	IFNa2	MS5	M	Mouse	median	8.893522263
R35W9_MS5_Ms_M_IFNa2.fcs	Mouse Ly6C-	Mouse Ly6C-	ms CD115+/NK1.1-	Sm154Di	pP38	IFNa2	MS5	M	Mouse	median	4.307511806
R35W9_MS5_Ms_M_IFNa2.fcs	Mouse Ly6C-	Mouse Ly6C-	ms CD115+/NK1.1-	Gd160Di	pZap70/Syk	IFNa2	MS5	M	Mouse	median	2.373457432
R35W9_MS5_Ms_M_IFNa2.fcs	Mouse Ly6C-	Mouse Ly6C-	ms CD115+/NK1.1-	Dy161Di	pTBK1	IFNa2	MS5	M	Mouse	median	6.187320709
R35W9_MS5_Ms_M_IFNa2.fcs	Mouse Ly6C-	Mouse Ly6C-	ms CD115+/NK1.1-	Ho165Di	pSTAT6	IFNa2	MS5	M	Mouse	median	11.39708805
R35W9_MS5_Ms_M_IFNa2.fcs	Mouse Ly6C-	Mouse Ly6C-	ms CD115+/NK1.1-	Er170Di	pSTAT4	IFNa2	MS5	M	Mouse	median	5.076476097
R35W9_MS5_Ms_M_IFNa2.fcs	Mouse Ly6C-	Mouse Ly6C-	ms CD115+/NK1.1-	Yb172Di	p4E-BP1	IFNa2	MS5	M	Mouse	median	13.09630871
R35W9_MS5_Ms_M_IFNa2.fcs	Mouse Ly6C-	Mouse Ly6C-	ms CD115+/NK1.1-	Tm169Di	Ki67	IFNa2	MS5	M	Mouse	median	14.54875946
R35W9_MS5_Ms_M_IFNa2.fcs	Mouse Ly6C-	Mouse Ly6C-	ms CD115+/NK1.1-	Dy163Di	IkBa	IFNa2	MS5	M	Mouse	median	33.71943665
R35W9_MS5_Ms_M_IFNa2.fcs	CD8+T cells	CD8+T cells	T Cells	La139Di	pSTAT3	IFNa2	MS5	M	Mouse	median	14.61244392
R35W9_MS5_Ms_M_IFNa2.fcs	CD8+T cells	CD8+T cells	T Cells	Nd144Di	pMAPKAPK2	IFNa2	MS5	M	Mouse	median	5.233250618
R35W9_MS5_Ms_M_IFNa2.fcs	CD8+T cells	CD8+T cells	T Cells	Nd145Di	pCREB	IFNa2	MS5	M	Mouse	median	28.18707466
R35W9_MS5_Ms_M_IFNa2.fcs	CD8+T cells	CD8+T cells	T Cells	Nd146Di	pPLCg2	IFNa2	MS5	M	Mouse	median	7.631031513
R35W9_MS5_Ms_M_IFNa2.fcs	CD8+T cells	CD8+T cells	T Cells	Sm147Di	pSTAT1	IFNa2	MS5	M	Mouse	median	2.839399576
R35W9_MS5_Ms_M_IFNa2.fcs	CD8+T cells	CD8+T cells	T Cells	Sm149Di	pSTAT5	IFNa2	MS5	M	Mouse	median	11.60010815
R35W9_MS5_Ms_M_IFNa2.fcs	CD8+T cells	CD8+T cells	T Cells	Sm150Di	pS6	IFNa2	MS5	M	Mouse	median	35.36598206
R35W9_MS5_Ms_M_IFNa2.fcs	CD8+T cells	CD8+T cells	T Cells	Sm152Di	pErk1/2	IFNa2	MS5	M	Mouse	median	10.00321674
R35W9_MS5_Ms_M_IFNa2.fcs	CD8+T cells	CD8+T cells	T Cells	Sm154Di	pP38	IFNa2	MS5	M	Mouse	median	5.039029121
R35W9_MS5_Ms_M_IFNa2.fcs	CD8+T cells	CD8+T cells	T Cells	Gd160Di	pZap70/Syk	IFNa2	MS5	M	Mouse	median	2.588868856
R35W9_MS5_Ms_M_IFNa2.fcs	CD8+T cells	CD8+T cells	T Cells	Dy161Di	pTBK1	IFNa2	MS5	M	Mouse	median	2.479732752
R35W9_MS5_Ms_M_IFNa2.fcs	CD8+T cells	CD8+T cells	T Cells	Ho165Di	pSTAT6	IFNa2	MS5	M	Mouse	median	9.723713875
R35W9_MS5_Ms_M_IFNa2.fcs	CD8+T cells	CD8+T cells	T Cells	Er170Di	pSTAT4	IFNa2	MS5	M	Mouse	median	3.995514631
R35W9_MS5_Ms_M_IFNa2.fcs	CD8+T cells	CD8+T cells	T Cells	Yb172Di	p4E-BP1	IFNa2	MS5	M	Mouse	median	4.643049717
R35W9_MS5_Ms_M_IFNa2.fcs	CD8+T cells	CD8+T cells	T Cells	Tm169Di	Ki67	IFNa2	MS5	M	Mouse	median	8.251824379
R35W9_MS5_Ms_M_IFNa2.fcs	CD8+T cells	CD8+T cells	T Cells	Dy163Di	IkBa	IFNa2	MS5	M	Mouse	median	17.29550552
R35W9_MS5_Ms_M_IFNa2.fcs	CD4+T cells	CD4+T cells	T Cells	La139Di	pSTAT3	IFNa2	MS5	M	Mouse	median	14.11768341
R35W9_MS5_Ms_M_IFNa2.fcs	CD4+T cells	CD4+T cells	T Cells	Nd144Di	pMAPKAPK2	IFNa2	MS5	M	Mouse	median	5.495856762
R35W9_MS5_Ms_M_IFNa2.fcs	CD4+T cells	CD4+T cells	T Cells	Nd145Di	pCREB	IFNa2	MS5	M	Mouse	median	35.00106812
R35W9_MS5_Ms_M_IFNa2.fcs	CD4+T cells	CD4+T cells	T Cells	Nd146Di	pPLCg2	IFNa2	MS5	M	Mouse	median	6.170096397
R35W9_MS5_Ms_M_IFNa2.fcs	CD4+T cells	CD4+T cells	T Cells	Sm147Di	pSTAT1	IFNa2	MS5	M	Mouse	median	2.339479685
R35W9_MS5_Ms_M_IFNa2.fcs	CD4+T cells	CD4+T cells	T Cells	Sm149Di	pSTAT5	IFNa2	MS5	M	Mouse	median	9.305591583
R35W9_MS5_Ms_M_IFNa2.fcs	CD4+T cells	CD4+T cells	T Cells	Sm150Di	pS6	IFNa2	MS5	M	Mouse	median	32.49154282
R35W9_MS5_Ms_M_IFNa2.fcs	CD4+T cells	CD4+T cells	T Cells	Sm152Di	pErk1/2	IFNa2	MS5	M	Mouse	median	10.15860558
R35W9_MS5_Ms_M_IFNa2.fcs	CD4+T cells	CD4+T cells	T Cells	Sm154Di	pP38	IFNa2	MS5	M	Mouse	median	4.077948093
R35W9_MS5_Ms_M_IFNa2.fcs	CD4+T cells	CD4+T cells	T Cells	Gd160Di	pZap70/Syk	IFNa2	MS5	M	Mouse	median	2.638585091
R35W9_MS5_Ms_M_IFNa2.fcs	CD4+T cells	CD4+T cells	T Cells	Dy161Di	pTBK1	IFNa2	MS5	M	Mouse	median	2.247857809
R35W9_MS5_Ms_M_IFNa2.fcs	CD4+T cells	CD4+T cells	T Cells	Ho165Di	pSTAT6	IFNa2	MS5	M	Mouse	median	9.681581497
R35W9_MS5_Ms_M_IFNa2.fcs	CD4+T cells	CD4+T cells	T Cells	Er170Di	pSTAT4	IFNa2	MS5	M	Mouse	median	3.275218725
R35W9_MS5_Ms_M_IFNa2.fcs	CD4+T cells	CD4+T cells	T Cells	Yb172Di	p4E-BP1	IFNa2	MS5	M	Mouse	median	6.292023182
R35W9_MS5_Ms_M_IFNa2.fcs	CD4+T cells	CD4+T cells	T Cells	Tm169Di	Ki67	IFNa2	MS5	M	Mouse	median	7.824664116
R35W9_MS5_Ms_M_IFNa2.fcs	CD4+T cells	CD4+T cells	T Cells	Dy163Di	IkBa	IFNa2	MS5	M	Mouse	median	16.94221878
R35W9_MS5_Ms_M_IFNa2.fcs	CD4+/CD8+	CD4+/CD8+	T Cells	La139Di	pSTAT3	IFNa2	MS5	M	Mouse	median	24.79240036
R35W9_MS5_Ms_M_IFNa2.fcs	CD4+/CD8+	CD4+/CD8+	T Cells	Nd144Di	pMAPKAPK2	IFNa2	MS5	M	Mouse	median	8.372031212
R35W9_MS5_Ms_M_IFNa2.fcs	CD4+/CD8+	CD4+/CD8+	T Cells	Nd145Di	pCREB	IFNa2	MS5	M	Mouse	median	59.2766571
R35W9_MS5_Ms_M_IFNa2.fcs	CD4+/CD8+	CD4+/CD8+	T Cells	Nd146Di	pPLCg2	IFNa2	MS5	M	Mouse	median	10.59785938
R35W9_MS5_Ms_M_IFNa2.fcs	CD4+/CD8+	CD4+/CD8+	T Cells	Sm147Di	pSTAT1	IFNa2	MS5	M	Mouse	median	4.145076275
R35W9_MS5_Ms_M_IFNa2.fcs	CD4+/CD8+	CD4+/CD8+	T Cells	Sm149Di	pSTAT5	IFNa2	MS5	M	Mouse	median	12.02604771
R35W9_MS5_Ms_M_IFNa2.fcs	CD4+/CD8+	CD4+/CD8+	T Cells	Sm150Di	pS6	IFNa2	MS5	M	Mouse	median	63.43825912
R35W9_MS5_Ms_M_IFNa2.fcs	CD4+/CD8+	CD4+/CD8+	T Cells	Sm152Di	pErk1/2	IFNa2	MS5	M	Mouse	median	16.26374626
R35W9_MS5_Ms_M_IFNa2.fcs	CD4+/CD8+	CD4+/CD8+	T Cells	Sm154Di	pP38	IFNa2	MS5	M	Mouse	median	6.688771725
R35W9_MS5_Ms_M_IFNa2.fcs	CD4+/CD8+	CD4+/CD8+	T Cells	Gd160Di	pZap70/Syk	IFNa2	MS5	M	Mouse	median	4.392674923
R35W9_MS5_Ms_M_IFNa2.fcs	CD4+/CD8+	CD4+/CD8+	T Cells	Dy161Di	pTBK1	IFNa2	MS5	M	Mouse	median	3.977802515
R35W9_MS5_Ms_M_IFNa2.fcs	CD4+/CD8+	CD4+/CD8+	T Cells	Ho165Di	pSTAT6	IFNa2	MS5	M	Mouse	median	13.19765759
R35W9_MS5_Ms_M_IFNa2.fcs	CD4+/CD8+	CD4+/CD8+	T Cells	Er170Di	pSTAT4	IFNa2	MS5	M	Mouse	median	5.556488991
R35W9_MS5_Ms_M_IFNa2.fcs	CD4+/CD8+	CD4+/CD8+	T Cells	Yb172Di	p4E-BP1	IFNa2	MS5	M	Mouse	median	6.043267727
R35W9_MS5_Ms_M_IFNa2.fcs	CD4+/CD8+	CD4+/CD8+	T Cells	Tm169Di	Ki67	IFNa2	MS5	M	Mouse	median	14.03879452
R35W9_MS5_Ms_M_IFNa2.fcs	CD4+/CD8+	CD4+/CD8+	T Cells	Dy163Di	IkBa	IFNa2	MS5	M	Mouse	median	27.84943008
R35W9_MS5_Ms_M_GM-CSF.fcs	Neutrophils	Neutrophils	Non-Basophils	La139Di	pSTAT3	GM-CSF	MS5	M	Mouse	median	43.47315025
R35W9_MS5_Ms_M_GM-CSF.fcs	Neutrophils	Neutrophils	Non-Basophils	Nd144Di	pMAPKAPK2	GM-CSF	MS5	M	Mouse	median	32.01148224
R35W9_MS5_Ms_M_GM-CSF.fcs	Neutrophils	Neutrophils	Non-Basophils	Nd145Di	pCREB	GM-CSF	MS5	M	Mouse	median	44.14853287
R35W9_MS5_Ms_M_GM-CSF.fcs	Neutrophils	Neutrophils	Non-Basophils	Nd146Di	pPLCg2	GM-CSF	MS5	M	Mouse	median	8.045136929
R35W9_MS5_Ms_M_GM-CSF.fcs	Neutrophils	Neutrophils	Non-Basophils	Sm147Di	pSTAT1	GM-CSF	MS5	M	Mouse	median	5.125525475
R35W9_MS5_Ms_M_GM-CSF.fcs	Neutrophils	Neutrophils	Non-Basophils	Sm149Di	pSTAT5	GM-CSF	MS5	M	Mouse	median	41.53969765
R35W9_MS5_Ms_M_GM-CSF.fcs	Neutrophils	Neutrophils	Non-Basophils	Sm150Di	pS6	GM-CSF	MS5	M	Mouse	median	61.51655388
R35W9_MS5_Ms_M_GM-CSF.fcs	Neutrophils	Neutrophils	Non-Basophils	Sm152Di	pErk1/2	GM-CSF	MS5	M	Mouse	median	28.36532497
R35W9_MS5_Ms_M_GM-CSF.fcs	Neutrophils	Neutrophils	Non-Basophils	Sm154Di	pP38	GM-CSF	MS5	M	Mouse	median	6.429872751
R35W9_MS5_Ms_M_GM-CSF.fcs	Neutrophils	Neutrophils	Non-Basophils	Gd160Di	pZap70/Syk	GM-CSF	MS5	M	Mouse	median	4.456122637
R35W9_MS5_Ms_M_GM-CSF.fcs	Neutrophils	Neutrophils	Non-Basophils	Dy161Di	pTBK1	GM-CSF	MS5	M	Mouse	median	2.1070081
R35W9_MS5_Ms_M_GM-CSF.fcs	Neutrophils	Neutrophils	Non-Basophils	Ho165Di	pSTAT6	GM-CSF	MS5	M	Mouse	median	4.764091253
R35W9_MS5_Ms_M_GM-CSF.fcs	Neutrophils	Neutrophils	Non-Basophils	Er170Di	pSTAT4	GM-CSF	MS5	M	Mouse	median	2.684132814
R35W9_MS5_Ms_M_GM-CSF.fcs	Neutrophils	Neutrophils	Non-Basophils	Yb172Di	p4E-BP1	GM-CSF	MS5	M	Mouse	median	4.802829027
R35W9_MS5_Ms_M_GM-CSF.fcs	Neutrophils	Neutrophils	Non-Basophils	Tm169Di	Ki67	GM-CSF	MS5	M	Mouse	median	65.87171936
R35W9_MS5_Ms_M_GM-CSF.fcs	Neutrophils	Neutrophils	Non-Basophils	Dy163Di	IkBa	GM-CSF	MS5	M	Mouse	median	3.533707142
R35W9_MS5_Ms_M_GM-CSF.fcs	B Cells	B Cells	CD45+ CD66-	La139Di	pSTAT3	GM-CSF	MS5	M	Mouse	median	19.85673904
R35W9_MS5_Ms_M_GM-CSF.fcs	B Cells	B Cells	CD45+ CD66-	Nd144Di	pMAPKAPK2	GM-CSF	MS5	M	Mouse	median	4.419843674
R35W9_MS5_Ms_M_GM-CSF.fcs	B Cells	B Cells	CD45+ CD66-	Nd145Di	pCREB	GM-CSF	MS5	M	Mouse	median	26.04001427
R35W9_MS5_Ms_M_GM-CSF.fcs	B Cells	B Cells	CD45+ CD66-	Nd146Di	pPLCg2	GM-CSF	MS5	M	Mouse	median	6.471204281
R35W9_MS5_Ms_M_GM-CSF.fcs	B Cells	B Cells	CD45+ CD66-	Sm147Di	pSTAT1	GM-CSF	MS5	M	Mouse	median	5.953649044
R35W9_MS5_Ms_M_GM-CSF.fcs	B Cells	B Cells	CD45+ CD66-	Sm149Di	pSTAT5	GM-CSF	MS5	M	Mouse	median	6.029175758
R35W9_MS5_Ms_M_GM-CSF.fcs	B Cells	B Cells	CD45+ CD66-	Sm150Di	pS6	GM-CSF	MS5	M	Mouse	median	26.81729698
R35W9_MS5_Ms_M_GM-CSF.fcs	B Cells	B Cells	CD45+ CD66-	Sm152Di	pErk1/2	GM-CSF	MS5	M	Mouse	median	6.436982155
R35W9_MS5_Ms_M_GM-CSF.fcs	B Cells	B Cells	CD45+ CD66-	Sm154Di	pP38	GM-CSF	MS5	M	Mouse	median	3.036019087
R35W9_MS5_Ms_M_GM-CSF.fcs	B Cells	B Cells	CD45+ CD66-	Gd160Di	pZap70/Syk	GM-CSF	MS5	M	Mouse	median	2.038952589
R35W9_MS5_Ms_M_GM-CSF.fcs	B Cells	B Cells	CD45+ CD66-	Dy161Di	pTBK1	GM-CSF	MS5	M	Mouse	median	4.059695721
R35W9_MS5_Ms_M_GM-CSF.fcs	B Cells	B Cells	CD45+ CD66-	Ho165Di	pSTAT6	GM-CSF	MS5	M	Mouse	median	8.724681854
R35W9_MS5_Ms_M_GM-CSF.fcs	B Cells	B Cells	CD45+ CD66-	Er170Di	pSTAT4	GM-CSF	MS5	M	Mouse	median	3.600052357
R35W9_MS5_Ms_M_GM-CSF.fcs	B Cells	B Cells	CD45+ CD66-	Yb172Di	p4E-BP1	GM-CSF	MS5	M	Mouse	median	10.39421463
R35W9_MS5_Ms_M_GM-CSF.fcs	B Cells	B Cells	CD45+ CD66-	Tm169Di	Ki67	GM-CSF	MS5	M	Mouse	median	8.033306122
R35W9_MS5_Ms_M_GM-CSF.fcs	B Cells	B Cells	CD45+ CD66-	Dy163Di	IkBa	GM-CSF	MS5	M	Mouse	median	24.23265457
R35W9_MS5_Ms_M_GM-CSF.fcs	Mouse Basophils	Mouse Basophils	ms NK1.1-	La139Di	pSTAT3	GM-CSF	MS5	M	Mouse	median	17.54555511
R35W9_MS5_Ms_M_GM-CSF.fcs	Mouse Basophils	Mouse Basophils	ms NK1.1-	Nd144Di	pMAPKAPK2	GM-CSF	MS5	M	Mouse	median	13.0834198
R35W9_MS5_Ms_M_GM-CSF.fcs	Mouse Basophils	Mouse Basophils	ms NK1.1-	Nd145Di	pCREB	GM-CSF	MS5	M	Mouse	median	41.4533844
R35W9_MS5_Ms_M_GM-CSF.fcs	Mouse Basophils	Mouse Basophils	ms NK1.1-	Nd146Di	pPLCg2	GM-CSF	MS5	M	Mouse	median	5.851181984
R35W9_MS5_Ms_M_GM-CSF.fcs	Mouse Basophils	Mouse Basophils	ms NK1.1-	Sm147Di	pSTAT1	GM-CSF	MS5	M	Mouse	median	2.356526852
R35W9_MS5_Ms_M_GM-CSF.fcs	Mouse Basophils	Mouse Basophils	ms NK1.1-	Sm149Di	pSTAT5	GM-CSF	MS5	M	Mouse	median	8.20548439
R35W9_MS5_Ms_M_GM-CSF.fcs	Mouse Basophils	Mouse Basophils	ms NK1.1-	Sm150Di	pS6	GM-CSF	MS5	M	Mouse	median	35.66382217
R35W9_MS5_Ms_M_GM-CSF.fcs	Mouse Basophils	Mouse Basophils	ms NK1.1-	Sm152Di	pErk1/2	GM-CSF	MS5	M	Mouse	median	13.38822937
R35W9_MS5_Ms_M_GM-CSF.fcs	Mouse Basophils	Mouse Basophils	ms NK1.1-	Sm154Di	pP38	GM-CSF	MS5	M	Mouse	median	7.361341
R35W9_MS5_Ms_M_GM-CSF.fcs	Mouse Basophils	Mouse Basophils	ms NK1.1-	Gd160Di	pZap70/Syk	GM-CSF	MS5	M	Mouse	median	1.923173428
R35W9_MS5_Ms_M_GM-CSF.fcs	Mouse Basophils	Mouse Basophils	ms NK1.1-	Dy161Di	pTBK1	GM-CSF	MS5	M	Mouse	median	12.50754166
R35W9_MS5_Ms_M_GM-CSF.fcs	Mouse Basophils	Mouse Basophils	ms NK1.1-	Ho165Di	pSTAT6	GM-CSF	MS5	M	Mouse	median	16.45510674
R35W9_MS5_Ms_M_GM-CSF.fcs	Mouse Basophils	Mouse Basophils	ms NK1.1-	Er170Di	pSTAT4	GM-CSF	MS5	M	Mouse	median	4.056832314
R35W9_MS5_Ms_M_GM-CSF.fcs	Mouse Basophils	Mouse Basophils	ms NK1.1-	Yb172Di	p4E-BP1	GM-CSF	MS5	M	Mouse	median	6.656027794
R35W9_MS5_Ms_M_GM-CSF.fcs	Mouse Basophils	Mouse Basophils	ms NK1.1-	Tm169Di	Ki67	GM-CSF	MS5	M	Mouse	median	134.9305725
R35W9_MS5_Ms_M_GM-CSF.fcs	Mouse Basophils	Mouse Basophils	ms NK1.1-	Dy163Di	IkBa	GM-CSF	MS5	M	Mouse	median	39.42202759
R35W9_MS5_Ms_M_GM-CSF.fcs	ms NK1.1+/CD115-	ms NK1.1+/CD115-	CD19- CD3-	La139Di	pSTAT3	GM-CSF	MS5	M	Mouse	median	11.13123608
R35W9_MS5_Ms_M_GM-CSF.fcs	ms NK1.1+/CD115-	ms NK1.1+/CD115-	CD19- CD3-	Nd144Di	pMAPKAPK2	GM-CSF	MS5	M	Mouse	median	4.306533813
R35W9_MS5_Ms_M_GM-CSF.fcs	ms NK1.1+/CD115-	ms NK1.1+/CD115-	CD19- CD3-	Nd145Di	pCREB	GM-CSF	MS5	M	Mouse	median	21.09000587
R35W9_MS5_Ms_M_GM-CSF.fcs	ms NK1.1+/CD115-	ms NK1.1+/CD115-	CD19- CD3-	Nd146Di	pPLCg2	GM-CSF	MS5	M	Mouse	median	5.870013475
R35W9_MS5_Ms_M_GM-CSF.fcs	ms NK1.1+/CD115-	ms NK1.1+/CD115-	CD19- CD3-	Sm147Di	pSTAT1	GM-CSF	MS5	M	Mouse	median	2.000196457
R35W9_MS5_Ms_M_GM-CSF.fcs	ms NK1.1+/CD115-	ms NK1.1+/CD115-	CD19- CD3-	Sm149Di	pSTAT5	GM-CSF	MS5	M	Mouse	median	7.024028301
R35W9_MS5_Ms_M_GM-CSF.fcs	ms NK1.1+/CD115-	ms NK1.1+/CD115-	CD19- CD3-	Sm150Di	pS6	GM-CSF	MS5	M	Mouse	median	21.64327621
R35W9_MS5_Ms_M_GM-CSF.fcs	ms NK1.1+/CD115-	ms NK1.1+/CD115-	CD19- CD3-	Sm152Di	pErk1/2	GM-CSF	MS5	M	Mouse	median	6.726668596
R35W9_MS5_Ms_M_GM-CSF.fcs	ms NK1.1+/CD115-	ms NK1.1+/CD115-	CD19- CD3-	Sm154Di	pP38	GM-CSF	MS5	M	Mouse	median	3.329158783
R35W9_MS5_Ms_M_GM-CSF.fcs	ms NK1.1+/CD115-	ms NK1.1+/CD115-	CD19- CD3-	Gd160Di	pZap70/Syk	GM-CSF	MS5	M	Mouse	median	1.422470033
R35W9_MS5_Ms_M_GM-CSF.fcs	ms NK1.1+/CD115-	ms NK1.1+/CD115-	CD19- CD3-	Dy161Di	pTBK1	GM-CSF	MS5	M	Mouse	median	3.311711788
R35W9_MS5_Ms_M_GM-CSF.fcs	ms NK1.1+/CD115-	ms NK1.1+/CD115-	CD19- CD3-	Ho165Di	pSTAT6	GM-CSF	MS5	M	Mouse	median	9.77774477
R35W9_MS5_Ms_M_GM-CSF.fcs	ms NK1.1+/CD115-	ms NK1.1+/CD115-	CD19- CD3-	Er170Di	pSTAT4	GM-CSF	MS5	M	Mouse	median	4.591744423
R35W9_MS5_Ms_M_GM-CSF.fcs	ms NK1.1+/CD115-	ms NK1.1+/CD115-	CD19- CD3-	Yb172Di	p4E-BP1	GM-CSF	MS5	M	Mouse	median	5.602260828
R35W9_MS5_Ms_M_GM-CSF.fcs	ms NK1.1+/CD115-	ms NK1.1+/CD115-	CD19- CD3-	Tm169Di	Ki67	GM-CSF	MS5	M	Mouse	median	10.69458628
R35W9_MS5_Ms_M_GM-CSF.fcs	ms NK1.1+/CD115-	ms NK1.1+/CD115-	CD19- CD3-	Dy163Di	IkBa	GM-CSF	MS5	M	Mouse	median	17.76174259
R35W9_MS5_Ms_M_GM-CSF.fcs	Mouse pDCs	Mouse pDCs	FcεRIα-	La139Di	pSTAT3	GM-CSF	MS5	M	Mouse	median	36.66798401
R35W9_MS5_Ms_M_GM-CSF.fcs	Mouse pDCs	Mouse pDCs	FcεRIα-	Nd144Di	pMAPKAPK2	GM-CSF	MS5	M	Mouse	median	7.392202854
R35W9_MS5_Ms_M_GM-CSF.fcs	Mouse pDCs	Mouse pDCs	FcεRIα-	Nd145Di	pCREB	GM-CSF	MS5	M	Mouse	median	25.31193924
R35W9_MS5_Ms_M_GM-CSF.fcs	Mouse pDCs	Mouse pDCs	FcεRIα-	Nd146Di	pPLCg2	GM-CSF	MS5	M	Mouse	median	14.9252739
R35W9_MS5_Ms_M_GM-CSF.fcs	Mouse pDCs	Mouse pDCs	FcεRIα-	Sm147Di	pSTAT1	GM-CSF	MS5	M	Mouse	median	5.168704987
R35W9_MS5_Ms_M_GM-CSF.fcs	Mouse pDCs	Mouse pDCs	FcεRIα-	Sm149Di	pSTAT5	GM-CSF	MS5	M	Mouse	median	14.28891468
R35W9_MS5_Ms_M_GM-CSF.fcs	Mouse pDCs	Mouse pDCs	FcεRIα-	Sm150Di	pS6	GM-CSF	MS5	M	Mouse	median	49.97765732
R35W9_MS5_Ms_M_GM-CSF.fcs	Mouse pDCs	Mouse pDCs	FcεRIα-	Sm152Di	pErk1/2	GM-CSF	MS5	M	Mouse	median	12.40891075
R35W9_MS5_Ms_M_GM-CSF.fcs	Mouse pDCs	Mouse pDCs	FcεRIα-	Sm154Di	pP38	GM-CSF	MS5	M	Mouse	median	4.581308365
R35W9_MS5_Ms_M_GM-CSF.fcs	Mouse pDCs	Mouse pDCs	FcεRIα-	Gd160Di	pZap70/Syk	GM-CSF	MS5	M	Mouse	median	2.421136141
R35W9_MS5_Ms_M_GM-CSF.fcs	Mouse pDCs	Mouse pDCs	FcεRIα-	Dy161Di	pTBK1	GM-CSF	MS5	M	Mouse	median	2.594547987
R35W9_MS5_Ms_M_GM-CSF.fcs	Mouse pDCs	Mouse pDCs	FcεRIα-	Ho165Di	pSTAT6	GM-CSF	MS5	M	Mouse	median	15.07652378
R35W9_MS5_Ms_M_GM-CSF.fcs	Mouse pDCs	Mouse pDCs	FcεRIα-	Er170Di	pSTAT4	GM-CSF	MS5	M	Mouse	median	3.765174389
R35W9_MS5_Ms_M_GM-CSF.fcs	Mouse pDCs	Mouse pDCs	FcεRIα-	Yb172Di	p4E-BP1	GM-CSF	MS5	M	Mouse	median	8.197337151
R35W9_MS5_Ms_M_GM-CSF.fcs	Mouse pDCs	Mouse pDCs	FcεRIα-	Tm169Di	Ki67	GM-CSF	MS5	M	Mouse	median	12.59145355
R35W9_MS5_Ms_M_GM-CSF.fcs	Mouse pDCs	Mouse pDCs	FcεRIα-	Dy163Di	IkBa	GM-CSF	MS5	M	Mouse	median	12.01237202
R35W9_MS5_Ms_M_GM-CSF.fcs	Mouse Ly6C+	Mouse Ly6C+	ms CD115+/NK1.1-	La139Di	pSTAT3	GM-CSF	MS5	M	Mouse	median	27.95225334
R35W9_MS5_Ms_M_GM-CSF.fcs	Mouse Ly6C+	Mouse Ly6C+	ms CD115+/NK1.1-	Nd144Di	pMAPKAPK2	GM-CSF	MS5	M	Mouse	median	10.35851431
R35W9_MS5_Ms_M_GM-CSF.fcs	Mouse Ly6C+	Mouse Ly6C+	ms CD115+/NK1.1-	Nd145Di	pCREB	GM-CSF	MS5	M	Mouse	median	38.8316288
R35W9_MS5_Ms_M_GM-CSF.fcs	Mouse Ly6C+	Mouse Ly6C+	ms CD115+/NK1.1-	Nd146Di	pPLCg2	GM-CSF	MS5	M	Mouse	median	10.12230539
R35W9_MS5_Ms_M_GM-CSF.fcs	Mouse Ly6C+	Mouse Ly6C+	ms CD115+/NK1.1-	Sm147Di	pSTAT1	GM-CSF	MS5	M	Mouse	median	4.597286463
R35W9_MS5_Ms_M_GM-CSF.fcs	Mouse Ly6C+	Mouse Ly6C+	ms CD115+/NK1.1-	Sm149Di	pSTAT5	GM-CSF	MS5	M	Mouse	median	63.09027481
R35W9_MS5_Ms_M_GM-CSF.fcs	Mouse Ly6C+	Mouse Ly6C+	ms CD115+/NK1.1-	Sm150Di	pS6	GM-CSF	MS5	M	Mouse	median	84.68334198
R35W9_MS5_Ms_M_GM-CSF.fcs	Mouse Ly6C+	Mouse Ly6C+	ms CD115+/NK1.1-	Sm152Di	pErk1/2	GM-CSF	MS5	M	Mouse	median	14.05090666
R35W9_MS5_Ms_M_GM-CSF.fcs	Mouse Ly6C+	Mouse Ly6C+	ms CD115+/NK1.1-	Sm154Di	pP38	GM-CSF	MS5	M	Mouse	median	5.819632053
R35W9_MS5_Ms_M_GM-CSF.fcs	Mouse Ly6C+	Mouse Ly6C+	ms CD115+/NK1.1-	Gd160Di	pZap70/Syk	GM-CSF	MS5	M	Mouse	median	1.86034894
R35W9_MS5_Ms_M_GM-CSF.fcs	Mouse Ly6C+	Mouse Ly6C+	ms CD115+/NK1.1-	Dy161Di	pTBK1	GM-CSF	MS5	M	Mouse	median	5.547553539
R35W9_MS5_Ms_M_GM-CSF.fcs	Mouse Ly6C+	Mouse Ly6C+	ms CD115+/NK1.1-	Ho165Di	pSTAT6	GM-CSF	MS5	M	Mouse	median	13.59120989
R35W9_MS5_Ms_M_GM-CSF.fcs	Mouse Ly6C+	Mouse Ly6C+	ms CD115+/NK1.1-	Er170Di	pSTAT4	GM-CSF	MS5	M	Mouse	median	4.063637972
R35W9_MS5_Ms_M_GM-CSF.fcs	Mouse Ly6C+	Mouse Ly6C+	ms CD115+/NK1.1-	Yb172Di	p4E-BP1	GM-CSF	MS5	M	Mouse	median	17.02036953
R35W9_MS5_Ms_M_GM-CSF.fcs	Mouse Ly6C+	Mouse Ly6C+	ms CD115+/NK1.1-	Tm169Di	Ki67	GM-CSF	MS5	M	Mouse	median	129.6112595
R35W9_MS5_Ms_M_GM-CSF.fcs	Mouse Ly6C+	Mouse Ly6C+	ms CD115+/NK1.1-	Dy163Di	IkBa	GM-CSF	MS5	M	Mouse	median	32.26293755
R35W9_MS5_Ms_M_GM-CSF.fcs	Mouse Ly6C-	Mouse Ly6C-	ms CD115+/NK1.1-	La139Di	pSTAT3	GM-CSF	MS5	M	Mouse	median	18.44989109
R35W9_MS5_Ms_M_GM-CSF.fcs	Mouse Ly6C-	Mouse Ly6C-	ms CD115+/NK1.1-	Nd144Di	pMAPKAPK2	GM-CSF	MS5	M	Mouse	median	7.186401606
R35W9_MS5_Ms_M_GM-CSF.fcs	Mouse Ly6C-	Mouse Ly6C-	ms CD115+/NK1.1-	Nd145Di	pCREB	GM-CSF	MS5	M	Mouse	median	31.84260178
R35W9_MS5_Ms_M_GM-CSF.fcs	Mouse Ly6C-	Mouse Ly6C-	ms CD115+/NK1.1-	Nd146Di	pPLCg2	GM-CSF	MS5	M	Mouse	median	15.10432625
R35W9_MS5_Ms_M_GM-CSF.fcs	Mouse Ly6C-	Mouse Ly6C-	ms CD115+/NK1.1-	Sm147Di	pSTAT1	GM-CSF	MS5	M	Mouse	median	2.952309966
R35W9_MS5_Ms_M_GM-CSF.fcs	Mouse Ly6C-	Mouse Ly6C-	ms CD115+/NK1.1-	Sm149Di	pSTAT5	GM-CSF	MS5	M	Mouse	median	55.12923241
R35W9_MS5_Ms_M_GM-CSF.fcs	Mouse Ly6C-	Mouse Ly6C-	ms CD115+/NK1.1-	Sm150Di	pS6	GM-CSF	MS5	M	Mouse	median	51.36302376
R35W9_MS5_Ms_M_GM-CSF.fcs	Mouse Ly6C-	Mouse Ly6C-	ms CD115+/NK1.1-	Sm152Di	pErk1/2	GM-CSF	MS5	M	Mouse	median	9.699720383
R35W9_MS5_Ms_M_GM-CSF.fcs	Mouse Ly6C-	Mouse Ly6C-	ms CD115+/NK1.1-	Sm154Di	pP38	GM-CSF	MS5	M	Mouse	median	5.792877674
R35W9_MS5_Ms_M_GM-CSF.fcs	Mouse Ly6C-	Mouse Ly6C-	ms CD115+/NK1.1-	Gd160Di	pZap70/Syk	GM-CSF	MS5	M	Mouse	median	2.215327501
R35W9_MS5_Ms_M_GM-CSF.fcs	Mouse Ly6C-	Mouse Ly6C-	ms CD115+/NK1.1-	Dy161Di	pTBK1	GM-CSF	MS5	M	Mouse	median	6.126215219
R35W9_MS5_Ms_M_GM-CSF.fcs	Mouse Ly6C-	Mouse Ly6C-	ms CD115+/NK1.1-	Ho165Di	pSTAT6	GM-CSF	MS5	M	Mouse	median	11.97950649
R35W9_MS5_Ms_M_GM-CSF.fcs	Mouse Ly6C-	Mouse Ly6C-	ms CD115+/NK1.1-	Er170Di	pSTAT4	GM-CSF	MS5	M	Mouse	median	5.111735344
R35W9_MS5_Ms_M_GM-CSF.fcs	Mouse Ly6C-	Mouse Ly6C-	ms CD115+/NK1.1-	Yb172Di	p4E-BP1	GM-CSF	MS5	M	Mouse	median	13.97732925
R35W9_MS5_Ms_M_GM-CSF.fcs	Mouse Ly6C-	Mouse Ly6C-	ms CD115+/NK1.1-	Tm169Di	Ki67	GM-CSF	MS5	M	Mouse	median	14.56219721
R35W9_MS5_Ms_M_GM-CSF.fcs	Mouse Ly6C-	Mouse Ly6C-	ms CD115+/NK1.1-	Dy163Di	IkBa	GM-CSF	MS5	M	Mouse	median	34.17359161
R35W9_MS5_Ms_M_GM-CSF.fcs	CD8+T cells	CD8+T cells	T Cells	La139Di	pSTAT3	GM-CSF	MS5	M	Mouse	median	14.90890884
R35W9_MS5_Ms_M_GM-CSF.fcs	CD8+T cells	CD8+T cells	T Cells	Nd144Di	pMAPKAPK2	GM-CSF	MS5	M	Mouse	median	5.531580925
R35W9_MS5_Ms_M_GM-CSF.fcs	CD8+T cells	CD8+T cells	T Cells	Nd145Di	pCREB	GM-CSF	MS5	M	Mouse	median	28.65455437
R35W9_MS5_Ms_M_GM-CSF.fcs	CD8+T cells	CD8+T cells	T Cells	Nd146Di	pPLCg2	GM-CSF	MS5	M	Mouse	median	7.911922216
R35W9_MS5_Ms_M_GM-CSF.fcs	CD8+T cells	CD8+T cells	T Cells	Sm147Di	pSTAT1	GM-CSF	MS5	M	Mouse	median	1.996720433
R35W9_MS5_Ms_M_GM-CSF.fcs	CD8+T cells	CD8+T cells	T Cells	Sm149Di	pSTAT5	GM-CSF	MS5	M	Mouse	median	12.49512148
R35W9_MS5_Ms_M_GM-CSF.fcs	CD8+T cells	CD8+T cells	T Cells	Sm150Di	pS6	GM-CSF	MS5	M	Mouse	median	35.81188393
R35W9_MS5_Ms_M_GM-CSF.fcs	CD8+T cells	CD8+T cells	T Cells	Sm152Di	pErk1/2	GM-CSF	MS5	M	Mouse	median	10.1560359
R35W9_MS5_Ms_M_GM-CSF.fcs	CD8+T cells	CD8+T cells	T Cells	Sm154Di	pP38	GM-CSF	MS5	M	Mouse	median	4.987928152
R35W9_MS5_Ms_M_GM-CSF.fcs	CD8+T cells	CD8+T cells	T Cells	Gd160Di	pZap70/Syk	GM-CSF	MS5	M	Mouse	median	2.718265414
R35W9_MS5_Ms_M_GM-CSF.fcs	CD8+T cells	CD8+T cells	T Cells	Dy161Di	pTBK1	GM-CSF	MS5	M	Mouse	median	2.60632956
R35W9_MS5_Ms_M_GM-CSF.fcs	CD8+T cells	CD8+T cells	T Cells	Ho165Di	pSTAT6	GM-CSF	MS5	M	Mouse	median	10.29677725
R35W9_MS5_Ms_M_GM-CSF.fcs	CD8+T cells	CD8+T cells	T Cells	Er170Di	pSTAT4	GM-CSF	MS5	M	Mouse	median	3.677767038
R35W9_MS5_Ms_M_GM-CSF.fcs	CD8+T cells	CD8+T cells	T Cells	Yb172Di	p4E-BP1	GM-CSF	MS5	M	Mouse	median	4.673228502
R35W9_MS5_Ms_M_GM-CSF.fcs	CD8+T cells	CD8+T cells	T Cells	Tm169Di	Ki67	GM-CSF	MS5	M	Mouse	median	8.320898533
R35W9_MS5_Ms_M_GM-CSF.fcs	CD8+T cells	CD8+T cells	T Cells	Dy163Di	IkBa	GM-CSF	MS5	M	Mouse	median	17.80871487
R35W9_MS5_Ms_M_GM-CSF.fcs	CD4+T cells	CD4+T cells	T Cells	La139Di	pSTAT3	GM-CSF	MS5	M	Mouse	median	14.5015583
R35W9_MS5_Ms_M_GM-CSF.fcs	CD4+T cells	CD4+T cells	T Cells	Nd144Di	pMAPKAPK2	GM-CSF	MS5	M	Mouse	median	5.694723129
R35W9_MS5_Ms_M_GM-CSF.fcs	CD4+T cells	CD4+T cells	T Cells	Nd145Di	pCREB	GM-CSF	MS5	M	Mouse	median	37.07063675
R35W9_MS5_Ms_M_GM-CSF.fcs	CD4+T cells	CD4+T cells	T Cells	Nd146Di	pPLCg2	GM-CSF	MS5	M	Mouse	median	6.380213976
R35W9_MS5_Ms_M_GM-CSF.fcs	CD4+T cells	CD4+T cells	T Cells	Sm147Di	pSTAT1	GM-CSF	MS5	M	Mouse	median	1.869971454
R35W9_MS5_Ms_M_GM-CSF.fcs	CD4+T cells	CD4+T cells	T Cells	Sm149Di	pSTAT5	GM-CSF	MS5	M	Mouse	median	9.861708164
R35W9_MS5_Ms_M_GM-CSF.fcs	CD4+T cells	CD4+T cells	T Cells	Sm150Di	pS6	GM-CSF	MS5	M	Mouse	median	33.25477791
R35W9_MS5_Ms_M_GM-CSF.fcs	CD4+T cells	CD4+T cells	T Cells	Sm152Di	pErk1/2	GM-CSF	MS5	M	Mouse	median	10.29245996
R35W9_MS5_Ms_M_GM-CSF.fcs	CD4+T cells	CD4+T cells	T Cells	Sm154Di	pP38	GM-CSF	MS5	M	Mouse	median	4.188899994
R35W9_MS5_Ms_M_GM-CSF.fcs	CD4+T cells	CD4+T cells	T Cells	Gd160Di	pZap70/Syk	GM-CSF	MS5	M	Mouse	median	2.615369558
R35W9_MS5_Ms_M_GM-CSF.fcs	CD4+T cells	CD4+T cells	T Cells	Dy161Di	pTBK1	GM-CSF	MS5	M	Mouse	median	2.341912389
R35W9_MS5_Ms_M_GM-CSF.fcs	CD4+T cells	CD4+T cells	T Cells	Ho165Di	pSTAT6	GM-CSF	MS5	M	Mouse	median	9.899139881
R35W9_MS5_Ms_M_GM-CSF.fcs	CD4+T cells	CD4+T cells	T Cells	Er170Di	pSTAT4	GM-CSF	MS5	M	Mouse	median	3.167957902
R35W9_MS5_Ms_M_GM-CSF.fcs	CD4+T cells	CD4+T cells	T Cells	Yb172Di	p4E-BP1	GM-CSF	MS5	M	Mouse	median	6.362550259
R35W9_MS5_Ms_M_GM-CSF.fcs	CD4+T cells	CD4+T cells	T Cells	Tm169Di	Ki67	GM-CSF	MS5	M	Mouse	median	8.026657104
R35W9_MS5_Ms_M_GM-CSF.fcs	CD4+T cells	CD4+T cells	T Cells	Dy163Di	IkBa	GM-CSF	MS5	M	Mouse	median	17.74065399
R35W9_MS5_Ms_M_GM-CSF.fcs	CD4+/CD8+	CD4+/CD8+	T Cells	La139Di	pSTAT3	GM-CSF	MS5	M	Mouse	median	25.40298271
R35W9_MS5_Ms_M_GM-CSF.fcs	CD4+/CD8+	CD4+/CD8+	T Cells	Nd144Di	pMAPKAPK2	GM-CSF	MS5	M	Mouse	median	10.14700127
R35W9_MS5_Ms_M_GM-CSF.fcs	CD4+/CD8+	CD4+/CD8+	T Cells	Nd145Di	pCREB	GM-CSF	MS5	M	Mouse	median	66.24481201
R35W9_MS5_Ms_M_GM-CSF.fcs	CD4+/CD8+	CD4+/CD8+	T Cells	Nd146Di	pPLCg2	GM-CSF	MS5	M	Mouse	median	11.24777412
R35W9_MS5_Ms_M_GM-CSF.fcs	CD4+/CD8+	CD4+/CD8+	T Cells	Sm147Di	pSTAT1	GM-CSF	MS5	M	Mouse	median	3.377364159
R35W9_MS5_Ms_M_GM-CSF.fcs	CD4+/CD8+	CD4+/CD8+	T Cells	Sm149Di	pSTAT5	GM-CSF	MS5	M	Mouse	median	19.24690628
R35W9_MS5_Ms_M_GM-CSF.fcs	CD4+/CD8+	CD4+/CD8+	T Cells	Sm150Di	pS6	GM-CSF	MS5	M	Mouse	median	64.98163605
R35W9_MS5_Ms_M_GM-CSF.fcs	CD4+/CD8+	CD4+/CD8+	T Cells	Sm152Di	pErk1/2	GM-CSF	MS5	M	Mouse	median	17.00320816
R35W9_MS5_Ms_M_GM-CSF.fcs	CD4+/CD8+	CD4+/CD8+	T Cells	Sm154Di	pP38	GM-CSF	MS5	M	Mouse	median	6.742266655
R35W9_MS5_Ms_M_GM-CSF.fcs	CD4+/CD8+	CD4+/CD8+	T Cells	Gd160Di	pZap70/Syk	GM-CSF	MS5	M	Mouse	median	3.878497839
R35W9_MS5_Ms_M_GM-CSF.fcs	CD4+/CD8+	CD4+/CD8+	T Cells	Dy161Di	pTBK1	GM-CSF	MS5	M	Mouse	median	4.117434025
R35W9_MS5_Ms_M_GM-CSF.fcs	CD4+/CD8+	CD4+/CD8+	T Cells	Ho165Di	pSTAT6	GM-CSF	MS5	M	Mouse	median	22.04587936
R35W9_MS5_Ms_M_GM-CSF.fcs	CD4+/CD8+	CD4+/CD8+	T Cells	Er170Di	pSTAT4	GM-CSF	MS5	M	Mouse	median	4.384550095
R35W9_MS5_Ms_M_GM-CSF.fcs	CD4+/CD8+	CD4+/CD8+	T Cells	Yb172Di	p4E-BP1	GM-CSF	MS5	M	Mouse	median	9.302757263
R35W9_MS5_Ms_M_GM-CSF.fcs	CD4+/CD8+	CD4+/CD8+	T Cells	Tm169Di	Ki67	GM-CSF	MS5	M	Mouse	median	11.56634998
R35W9_MS5_Ms_M_GM-CSF.fcs	CD4+/CD8+	CD4+/CD8+	T Cells	Dy163Di	IkBa	GM-CSF	MS5	M	Mouse	median	29.61317062
R35W9_MS5_Ms_M_LPS.fcs	Neutrophils	Neutrophils	Non-Basophils	La139Di	pSTAT3	LPS	MS5	M	Mouse	median	39.16724586
R35W9_MS5_Ms_M_LPS.fcs	Neutrophils	Neutrophils	Non-Basophils	Nd144Di	pMAPKAPK2	LPS	MS5	M	Mouse	median	10.50272322
R35W9_MS5_Ms_M_LPS.fcs	Neutrophils	Neutrophils	Non-Basophils	Nd145Di	pCREB	LPS	MS5	M	Mouse	median	34.33733177
R35W9_MS5_Ms_M_LPS.fcs	Neutrophils	Neutrophils	Non-Basophils	Nd146Di	pPLCg2	LPS	MS5	M	Mouse	median	8.093278885
R35W9_MS5_Ms_M_LPS.fcs	Neutrophils	Neutrophils	Non-Basophils	Sm147Di	pSTAT1	LPS	MS5	M	Mouse	median	4.330729961
R35W9_MS5_Ms_M_LPS.fcs	Neutrophils	Neutrophils	Non-Basophils	Sm149Di	pSTAT5	LPS	MS5	M	Mouse	median	7.369220734
R35W9_MS5_Ms_M_LPS.fcs	Neutrophils	Neutrophils	Non-Basophils	Sm150Di	pS6	LPS	MS5	M	Mouse	median	58.85208511
R35W9_MS5_Ms_M_LPS.fcs	Neutrophils	Neutrophils	Non-Basophils	Sm152Di	pErk1/2	LPS	MS5	M	Mouse	median	21.54714203
R35W9_MS5_Ms_M_LPS.fcs	Neutrophils	Neutrophils	Non-Basophils	Sm154Di	pP38	LPS	MS5	M	Mouse	median	5.721261978
R35W9_MS5_Ms_M_LPS.fcs	Neutrophils	Neutrophils	Non-Basophils	Gd160Di	pZap70/Syk	LPS	MS5	M	Mouse	median	4.361808538
R35W9_MS5_Ms_M_LPS.fcs	Neutrophils	Neutrophils	Non-Basophils	Dy161Di	pTBK1	LPS	MS5	M	Mouse	median	2.176066518
R35W9_MS5_Ms_M_LPS.fcs	Neutrophils	Neutrophils	Non-Basophils	Ho165Di	pSTAT6	LPS	MS5	M	Mouse	median	4.181398392
R35W9_MS5_Ms_M_LPS.fcs	Neutrophils	Neutrophils	Non-Basophils	Er170Di	pSTAT4	LPS	MS5	M	Mouse	median	2.850683212
R35W9_MS5_Ms_M_LPS.fcs	Neutrophils	Neutrophils	Non-Basophils	Yb172Di	p4E-BP1	LPS	MS5	M	Mouse	median	5.465073824
R35W9_MS5_Ms_M_LPS.fcs	Neutrophils	Neutrophils	Non-Basophils	Tm169Di	Ki67	LPS	MS5	M	Mouse	median	47.46556091
R35W9_MS5_Ms_M_LPS.fcs	Neutrophils	Neutrophils	Non-Basophils	Dy163Di	IkBa	LPS	MS5	M	Mouse	median	4.162708282
R35W9_MS5_Ms_M_LPS.fcs	B Cells	B Cells	CD45+ CD66-	La139Di	pSTAT3	LPS	MS5	M	Mouse	median	20.46665573
R35W9_MS5_Ms_M_LPS.fcs	B Cells	B Cells	CD45+ CD66-	Nd144Di	pMAPKAPK2	LPS	MS5	M	Mouse	median	4.55442667
R35W9_MS5_Ms_M_LPS.fcs	B Cells	B Cells	CD45+ CD66-	Nd145Di	pCREB	LPS	MS5	M	Mouse	median	25.39680099
R35W9_MS5_Ms_M_LPS.fcs	B Cells	B Cells	CD45+ CD66-	Nd146Di	pPLCg2	LPS	MS5	M	Mouse	median	6.605764866
R35W9_MS5_Ms_M_LPS.fcs	B Cells	B Cells	CD45+ CD66-	Sm147Di	pSTAT1	LPS	MS5	M	Mouse	median	5.835928917
R35W9_MS5_Ms_M_LPS.fcs	B Cells	B Cells	CD45+ CD66-	Sm149Di	pSTAT5	LPS	MS5	M	Mouse	median	6.157529354
R35W9_MS5_Ms_M_LPS.fcs	B Cells	B Cells	CD45+ CD66-	Sm150Di	pS6	LPS	MS5	M	Mouse	median	28.03315353
R35W9_MS5_Ms_M_LPS.fcs	B Cells	B Cells	CD45+ CD66-	Sm152Di	pErk1/2	LPS	MS5	M	Mouse	median	6.488443851
R35W9_MS5_Ms_M_LPS.fcs	B Cells	B Cells	CD45+ CD66-	Sm154Di	pP38	LPS	MS5	M	Mouse	median	3.081119776
R35W9_MS5_Ms_M_LPS.fcs	B Cells	B Cells	CD45+ CD66-	Gd160Di	pZap70/Syk	LPS	MS5	M	Mouse	median	2.054492712
R35W9_MS5_Ms_M_LPS.fcs	B Cells	B Cells	CD45+ CD66-	Dy161Di	pTBK1	LPS	MS5	M	Mouse	median	4.147806168
R35W9_MS5_Ms_M_LPS.fcs	B Cells	B Cells	CD45+ CD66-	Ho165Di	pSTAT6	LPS	MS5	M	Mouse	median	8.597350121
R35W9_MS5_Ms_M_LPS.fcs	B Cells	B Cells	CD45+ CD66-	Er170Di	pSTAT4	LPS	MS5	M	Mouse	median	3.678524733
R35W9_MS5_Ms_M_LPS.fcs	B Cells	B Cells	CD45+ CD66-	Yb172Di	p4E-BP1	LPS	MS5	M	Mouse	median	10.74448395
R35W9_MS5_Ms_M_LPS.fcs	B Cells	B Cells	CD45+ CD66-	Tm169Di	Ki67	LPS	MS5	M	Mouse	median	8.449910164
R35W9_MS5_Ms_M_LPS.fcs	B Cells	B Cells	CD45+ CD66-	Dy163Di	IkBa	LPS	MS5	M	Mouse	median	23.76199722
R35W9_MS5_Ms_M_LPS.fcs	Mouse Basophils	Mouse Basophils	ms NK1.1-	La139Di	pSTAT3	LPS	MS5	M	Mouse	median	17.53761959
R35W9_MS5_Ms_M_LPS.fcs	Mouse Basophils	Mouse Basophils	ms NK1.1-	Nd144Di	pMAPKAPK2	LPS	MS5	M	Mouse	median	10.61264944
R35W9_MS5_Ms_M_LPS.fcs	Mouse Basophils	Mouse Basophils	ms NK1.1-	Nd145Di	pCREB	LPS	MS5	M	Mouse	median	34.47803497
R35W9_MS5_Ms_M_LPS.fcs	Mouse Basophils	Mouse Basophils	ms NK1.1-	Nd146Di	pPLCg2	LPS	MS5	M	Mouse	median	5.83519721
R35W9_MS5_Ms_M_LPS.fcs	Mouse Basophils	Mouse Basophils	ms NK1.1-	Sm147Di	pSTAT1	LPS	MS5	M	Mouse	median	2.59181428
R35W9_MS5_Ms_M_LPS.fcs	Mouse Basophils	Mouse Basophils	ms NK1.1-	Sm149Di	pSTAT5	LPS	MS5	M	Mouse	median	6.33304286
R35W9_MS5_Ms_M_LPS.fcs	Mouse Basophils	Mouse Basophils	ms NK1.1-	Sm150Di	pS6	LPS	MS5	M	Mouse	median	36.50928116
R35W9_MS5_Ms_M_LPS.fcs	Mouse Basophils	Mouse Basophils	ms NK1.1-	Sm152Di	pErk1/2	LPS	MS5	M	Mouse	median	13.35246515
R35W9_MS5_Ms_M_LPS.fcs	Mouse Basophils	Mouse Basophils	ms NK1.1-	Sm154Di	pP38	LPS	MS5	M	Mouse	median	5.795179129
R35W9_MS5_Ms_M_LPS.fcs	Mouse Basophils	Mouse Basophils	ms NK1.1-	Gd160Di	pZap70/Syk	LPS	MS5	M	Mouse	median	1.921773136
R35W9_MS5_Ms_M_LPS.fcs	Mouse Basophils	Mouse Basophils	ms NK1.1-	Dy161Di	pTBK1	LPS	MS5	M	Mouse	median	12.68319368
R35W9_MS5_Ms_M_LPS.fcs	Mouse Basophils	Mouse Basophils	ms NK1.1-	Ho165Di	pSTAT6	LPS	MS5	M	Mouse	median	14.7901969
R35W9_MS5_Ms_M_LPS.fcs	Mouse Basophils	Mouse Basophils	ms NK1.1-	Er170Di	pSTAT4	LPS	MS5	M	Mouse	median	3.870843291
R35W9_MS5_Ms_M_LPS.fcs	Mouse Basophils	Mouse Basophils	ms NK1.1-	Yb172Di	p4E-BP1	LPS	MS5	M	Mouse	median	7.163372993
R35W9_MS5_Ms_M_LPS.fcs	Mouse Basophils	Mouse Basophils	ms NK1.1-	Tm169Di	Ki67	LPS	MS5	M	Mouse	median	119.7275124
R35W9_MS5_Ms_M_LPS.fcs	Mouse Basophils	Mouse Basophils	ms NK1.1-	Dy163Di	IkBa	LPS	MS5	M	Mouse	median	39.13889122
R35W9_MS5_Ms_M_LPS.fcs	ms NK1.1+/CD115-	ms NK1.1+/CD115-	CD19- CD3-	La139Di	pSTAT3	LPS	MS5	M	Mouse	median	11.12911463
R35W9_MS5_Ms_M_LPS.fcs	ms NK1.1+/CD115-	ms NK1.1+/CD115-	CD19- CD3-	Nd144Di	pMAPKAPK2	LPS	MS5	M	Mouse	median	4.049042463
R35W9_MS5_Ms_M_LPS.fcs	ms NK1.1+/CD115-	ms NK1.1+/CD115-	CD19- CD3-	Nd145Di	pCREB	LPS	MS5	M	Mouse	median	20.04181957
R35W9_MS5_Ms_M_LPS.fcs	ms NK1.1+/CD115-	ms NK1.1+/CD115-	CD19- CD3-	Nd146Di	pPLCg2	LPS	MS5	M	Mouse	median	5.763089657
R35W9_MS5_Ms_M_LPS.fcs	ms NK1.1+/CD115-	ms NK1.1+/CD115-	CD19- CD3-	Sm147Di	pSTAT1	LPS	MS5	M	Mouse	median	1.809734643
R35W9_MS5_Ms_M_LPS.fcs	ms NK1.1+/CD115-	ms NK1.1+/CD115-	CD19- CD3-	Sm149Di	pSTAT5	LPS	MS5	M	Mouse	median	7.012300014
R35W9_MS5_Ms_M_LPS.fcs	ms NK1.1+/CD115-	ms NK1.1+/CD115-	CD19- CD3-	Sm150Di	pS6	LPS	MS5	M	Mouse	median	21.68057632
R35W9_MS5_Ms_M_LPS.fcs	ms NK1.1+/CD115-	ms NK1.1+/CD115-	CD19- CD3-	Sm152Di	pErk1/2	LPS	MS5	M	Mouse	median	6.381028652
R35W9_MS5_Ms_M_LPS.fcs	ms NK1.1+/CD115-	ms NK1.1+/CD115-	CD19- CD3-	Sm154Di	pP38	LPS	MS5	M	Mouse	median	3.051409364
R35W9_MS5_Ms_M_LPS.fcs	ms NK1.1+/CD115-	ms NK1.1+/CD115-	CD19- CD3-	Gd160Di	pZap70/Syk	LPS	MS5	M	Mouse	median	1.460595548
R35W9_MS5_Ms_M_LPS.fcs	ms NK1.1+/CD115-	ms NK1.1+/CD115-	CD19- CD3-	Dy161Di	pTBK1	LPS	MS5	M	Mouse	median	3.225900173
R35W9_MS5_Ms_M_LPS.fcs	ms NK1.1+/CD115-	ms NK1.1+/CD115-	CD19- CD3-	Ho165Di	pSTAT6	LPS	MS5	M	Mouse	median	8.983039379
R35W9_MS5_Ms_M_LPS.fcs	ms NK1.1+/CD115-	ms NK1.1+/CD115-	CD19- CD3-	Er170Di	pSTAT4	LPS	MS5	M	Mouse	median	4.521283388
R35W9_MS5_Ms_M_LPS.fcs	ms NK1.1+/CD115-	ms NK1.1+/CD115-	CD19- CD3-	Yb172Di	p4E-BP1	LPS	MS5	M	Mouse	median	5.650313139
R35W9_MS5_Ms_M_LPS.fcs	ms NK1.1+/CD115-	ms NK1.1+/CD115-	CD19- CD3-	Tm169Di	Ki67	LPS	MS5	M	Mouse	median	10.86532259
R35W9_MS5_Ms_M_LPS.fcs	ms NK1.1+/CD115-	ms NK1.1+/CD115-	CD19- CD3-	Dy163Di	IkBa	LPS	MS5	M	Mouse	median	16.64447784
R35W9_MS5_Ms_M_LPS.fcs	Mouse pDCs	Mouse pDCs	FcεRIα-	La139Di	pSTAT3	LPS	MS5	M	Mouse	median	41.26358032
R35W9_MS5_Ms_M_LPS.fcs	Mouse pDCs	Mouse pDCs	FcεRIα-	Nd144Di	pMAPKAPK2	LPS	MS5	M	Mouse	median	9.133282661
R35W9_MS5_Ms_M_LPS.fcs	Mouse pDCs	Mouse pDCs	FcεRIα-	Nd145Di	pCREB	LPS	MS5	M	Mouse	median	22.05243874
R35W9_MS5_Ms_M_LPS.fcs	Mouse pDCs	Mouse pDCs	FcεRIα-	Nd146Di	pPLCg2	LPS	MS5	M	Mouse	median	16.36066055
R35W9_MS5_Ms_M_LPS.fcs	Mouse pDCs	Mouse pDCs	FcεRIα-	Sm147Di	pSTAT1	LPS	MS5	M	Mouse	median	5.916106224
R35W9_MS5_Ms_M_LPS.fcs	Mouse pDCs	Mouse pDCs	FcεRIα-	Sm149Di	pSTAT5	LPS	MS5	M	Mouse	median	9.908361435
R35W9_MS5_Ms_M_LPS.fcs	Mouse pDCs	Mouse pDCs	FcεRIα-	Sm150Di	pS6	LPS	MS5	M	Mouse	median	51.47524643
R35W9_MS5_Ms_M_LPS.fcs	Mouse pDCs	Mouse pDCs	FcεRIα-	Sm152Di	pErk1/2	LPS	MS5	M	Mouse	median	11.97257042
R35W9_MS5_Ms_M_LPS.fcs	Mouse pDCs	Mouse pDCs	FcεRIα-	Sm154Di	pP38	LPS	MS5	M	Mouse	median	5.231582165
R35W9_MS5_Ms_M_LPS.fcs	Mouse pDCs	Mouse pDCs	FcεRIα-	Gd160Di	pZap70/Syk	LPS	MS5	M	Mouse	median	2.477974892
R35W9_MS5_Ms_M_LPS.fcs	Mouse pDCs	Mouse pDCs	FcεRIα-	Dy161Di	pTBK1	LPS	MS5	M	Mouse	median	3.482652187
R35W9_MS5_Ms_M_LPS.fcs	Mouse pDCs	Mouse pDCs	FcεRIα-	Ho165Di	pSTAT6	LPS	MS5	M	Mouse	median	13.00836277
R35W9_MS5_Ms_M_LPS.fcs	Mouse pDCs	Mouse pDCs	FcεRIα-	Er170Di	pSTAT4	LPS	MS5	M	Mouse	median	4.883072853
R35W9_MS5_Ms_M_LPS.fcs	Mouse pDCs	Mouse pDCs	FcεRIα-	Yb172Di	p4E-BP1	LPS	MS5	M	Mouse	median	9.249651909
R35W9_MS5_Ms_M_LPS.fcs	Mouse pDCs	Mouse pDCs	FcεRIα-	Tm169Di	Ki67	LPS	MS5	M	Mouse	median	8.271057129
R35W9_MS5_Ms_M_LPS.fcs	Mouse pDCs	Mouse pDCs	FcεRIα-	Dy163Di	IkBa	LPS	MS5	M	Mouse	median	12.73032951
R35W9_MS5_Ms_M_LPS.fcs	Mouse Ly6C+	Mouse Ly6C+	ms CD115+/NK1.1-	La139Di	pSTAT3	LPS	MS5	M	Mouse	median	25.52434158
R35W9_MS5_Ms_M_LPS.fcs	Mouse Ly6C+	Mouse Ly6C+	ms CD115+/NK1.1-	Nd144Di	pMAPKAPK2	LPS	MS5	M	Mouse	median	7.919871807
R35W9_MS5_Ms_M_LPS.fcs	Mouse Ly6C+	Mouse Ly6C+	ms CD115+/NK1.1-	Nd145Di	pCREB	LPS	MS5	M	Mouse	median	28.63799477
R35W9_MS5_Ms_M_LPS.fcs	Mouse Ly6C+	Mouse Ly6C+	ms CD115+/NK1.1-	Nd146Di	pPLCg2	LPS	MS5	M	Mouse	median	8.71115303
R35W9_MS5_Ms_M_LPS.fcs	Mouse Ly6C+	Mouse Ly6C+	ms CD115+/NK1.1-	Sm147Di	pSTAT1	LPS	MS5	M	Mouse	median	3.445687294
R35W9_MS5_Ms_M_LPS.fcs	Mouse Ly6C+	Mouse Ly6C+	ms CD115+/NK1.1-	Sm149Di	pSTAT5	LPS	MS5	M	Mouse	median	13.91835117
R35W9_MS5_Ms_M_LPS.fcs	Mouse Ly6C+	Mouse Ly6C+	ms CD115+/NK1.1-	Sm150Di	pS6	LPS	MS5	M	Mouse	median	68.24187469
R35W9_MS5_Ms_M_LPS.fcs	Mouse Ly6C+	Mouse Ly6C+	ms CD115+/NK1.1-	Sm152Di	pErk1/2	LPS	MS5	M	Mouse	median	11.5283432
R35W9_MS5_Ms_M_LPS.fcs	Mouse Ly6C+	Mouse Ly6C+	ms CD115+/NK1.1-	Sm154Di	pP38	LPS	MS5	M	Mouse	median	5.336116791
R35W9_MS5_Ms_M_LPS.fcs	Mouse Ly6C+	Mouse Ly6C+	ms CD115+/NK1.1-	Gd160Di	pZap70/Syk	LPS	MS5	M	Mouse	median	1.655050755
R35W9_MS5_Ms_M_LPS.fcs	Mouse Ly6C+	Mouse Ly6C+	ms CD115+/NK1.1-	Dy161Di	pTBK1	LPS	MS5	M	Mouse	median	5.322738171
R35W9_MS5_Ms_M_LPS.fcs	Mouse Ly6C+	Mouse Ly6C+	ms CD115+/NK1.1-	Ho165Di	pSTAT6	LPS	MS5	M	Mouse	median	10.79758072
R35W9_MS5_Ms_M_LPS.fcs	Mouse Ly6C+	Mouse Ly6C+	ms CD115+/NK1.1-	Er170Di	pSTAT4	LPS	MS5	M	Mouse	median	4.076114178
R35W9_MS5_Ms_M_LPS.fcs	Mouse Ly6C+	Mouse Ly6C+	ms CD115+/NK1.1-	Yb172Di	p4E-BP1	LPS	MS5	M	Mouse	median	17.25698662
R35W9_MS5_Ms_M_LPS.fcs	Mouse Ly6C+	Mouse Ly6C+	ms CD115+/NK1.1-	Tm169Di	Ki67	LPS	MS5	M	Mouse	median	113.0212402
R35W9_MS5_Ms_M_LPS.fcs	Mouse Ly6C+	Mouse Ly6C+	ms CD115+/NK1.1-	Dy163Di	IkBa	LPS	MS5	M	Mouse	median	27.22358322
R35W9_MS5_Ms_M_LPS.fcs	Mouse Ly6C-	Mouse Ly6C-	ms CD115+/NK1.1-	La139Di	pSTAT3	LPS	MS5	M	Mouse	median	16.12852669
R35W9_MS5_Ms_M_LPS.fcs	Mouse Ly6C-	Mouse Ly6C-	ms CD115+/NK1.1-	Nd144Di	pMAPKAPK2	LPS	MS5	M	Mouse	median	6.506171703
R35W9_MS5_Ms_M_LPS.fcs	Mouse Ly6C-	Mouse Ly6C-	ms CD115+/NK1.1-	Nd145Di	pCREB	LPS	MS5	M	Mouse	median	29.10362434
R35W9_MS5_Ms_M_LPS.fcs	Mouse Ly6C-	Mouse Ly6C-	ms CD115+/NK1.1-	Nd146Di	pPLCg2	LPS	MS5	M	Mouse	median	14.44802189
R35W9_MS5_Ms_M_LPS.fcs	Mouse Ly6C-	Mouse Ly6C-	ms CD115+/NK1.1-	Sm147Di	pSTAT1	LPS	MS5	M	Mouse	median	2.491103888
R35W9_MS5_Ms_M_LPS.fcs	Mouse Ly6C-	Mouse Ly6C-	ms CD115+/NK1.1-	Sm149Di	pSTAT5	LPS	MS5	M	Mouse	median	9.88690567
R35W9_MS5_Ms_M_LPS.fcs	Mouse Ly6C-	Mouse Ly6C-	ms CD115+/NK1.1-	Sm150Di	pS6	LPS	MS5	M	Mouse	median	48.63902283
R35W9_MS5_Ms_M_LPS.fcs	Mouse Ly6C-	Mouse Ly6C-	ms CD115+/NK1.1-	Sm152Di	pErk1/2	LPS	MS5	M	Mouse	median	8.761125565
R35W9_MS5_Ms_M_LPS.fcs	Mouse Ly6C-	Mouse Ly6C-	ms CD115+/NK1.1-	Sm154Di	pP38	LPS	MS5	M	Mouse	median	4.457008362
R35W9_MS5_Ms_M_LPS.fcs	Mouse Ly6C-	Mouse Ly6C-	ms CD115+/NK1.1-	Gd160Di	pZap70/Syk	LPS	MS5	M	Mouse	median	2.302512407
R35W9_MS5_Ms_M_LPS.fcs	Mouse Ly6C-	Mouse Ly6C-	ms CD115+/NK1.1-	Dy161Di	pTBK1	LPS	MS5	M	Mouse	median	6.22674799
R35W9_MS5_Ms_M_LPS.fcs	Mouse Ly6C-	Mouse Ly6C-	ms CD115+/NK1.1-	Ho165Di	pSTAT6	LPS	MS5	M	Mouse	median	10.89446068
R35W9_MS5_Ms_M_LPS.fcs	Mouse Ly6C-	Mouse Ly6C-	ms CD115+/NK1.1-	Er170Di	pSTAT4	LPS	MS5	M	Mouse	median	5.074376583
R35W9_MS5_Ms_M_LPS.fcs	Mouse Ly6C-	Mouse Ly6C-	ms CD115+/NK1.1-	Yb172Di	p4E-BP1	LPS	MS5	M	Mouse	median	13.69796181
R35W9_MS5_Ms_M_LPS.fcs	Mouse Ly6C-	Mouse Ly6C-	ms CD115+/NK1.1-	Tm169Di	Ki67	LPS	MS5	M	Mouse	median	13.71186256
R35W9_MS5_Ms_M_LPS.fcs	Mouse Ly6C-	Mouse Ly6C-	ms CD115+/NK1.1-	Dy163Di	IkBa	LPS	MS5	M	Mouse	median	33.18523788
R35W9_MS5_Ms_M_LPS.fcs	CD8+T cells	CD8+T cells	T Cells	La139Di	pSTAT3	LPS	MS5	M	Mouse	median	14.90948772
R35W9_MS5_Ms_M_LPS.fcs	CD8+T cells	CD8+T cells	T Cells	Nd144Di	pMAPKAPK2	LPS	MS5	M	Mouse	median	5.279701233
R35W9_MS5_Ms_M_LPS.fcs	CD8+T cells	CD8+T cells	T Cells	Nd145Di	pCREB	LPS	MS5	M	Mouse	median	28.30084801
R35W9_MS5_Ms_M_LPS.fcs	CD8+T cells	CD8+T cells	T Cells	Nd146Di	pPLCg2	LPS	MS5	M	Mouse	median	7.615373135
R35W9_MS5_Ms_M_LPS.fcs	CD8+T cells	CD8+T cells	T Cells	Sm147Di	pSTAT1	LPS	MS5	M	Mouse	median	1.842784286
R35W9_MS5_Ms_M_LPS.fcs	CD8+T cells	CD8+T cells	T Cells	Sm149Di	pSTAT5	LPS	MS5	M	Mouse	median	11.79624462
R35W9_MS5_Ms_M_LPS.fcs	CD8+T cells	CD8+T cells	T Cells	Sm150Di	pS6	LPS	MS5	M	Mouse	median	36.48880005
R35W9_MS5_Ms_M_LPS.fcs	CD8+T cells	CD8+T cells	T Cells	Sm152Di	pErk1/2	LPS	MS5	M	Mouse	median	9.629258156
R35W9_MS5_Ms_M_LPS.fcs	CD8+T cells	CD8+T cells	T Cells	Sm154Di	pP38	LPS	MS5	M	Mouse	median	5.093663216
R35W9_MS5_Ms_M_LPS.fcs	CD8+T cells	CD8+T cells	T Cells	Gd160Di	pZap70/Syk	LPS	MS5	M	Mouse	median	2.594217777
R35W9_MS5_Ms_M_LPS.fcs	CD8+T cells	CD8+T cells	T Cells	Dy161Di	pTBK1	LPS	MS5	M	Mouse	median	2.541476011
R35W9_MS5_Ms_M_LPS.fcs	CD8+T cells	CD8+T cells	T Cells	Ho165Di	pSTAT6	LPS	MS5	M	Mouse	median	9.614261627
R35W9_MS5_Ms_M_LPS.fcs	CD8+T cells	CD8+T cells	T Cells	Er170Di	pSTAT4	LPS	MS5	M	Mouse	median	3.597456455
R35W9_MS5_Ms_M_LPS.fcs	CD8+T cells	CD8+T cells	T Cells	Yb172Di	p4E-BP1	LPS	MS5	M	Mouse	median	4.95290184
R35W9_MS5_Ms_M_LPS.fcs	CD8+T cells	CD8+T cells	T Cells	Tm169Di	Ki67	LPS	MS5	M	Mouse	median	8.506059647
R35W9_MS5_Ms_M_LPS.fcs	CD8+T cells	CD8+T cells	T Cells	Dy163Di	IkBa	LPS	MS5	M	Mouse	median	16.92299652
R35W9_MS5_Ms_M_LPS.fcs	CD4+T cells	CD4+T cells	T Cells	La139Di	pSTAT3	LPS	MS5	M	Mouse	median	14.97910309
R35W9_MS5_Ms_M_LPS.fcs	CD4+T cells	CD4+T cells	T Cells	Nd144Di	pMAPKAPK2	LPS	MS5	M	Mouse	median	5.825551033
R35W9_MS5_Ms_M_LPS.fcs	CD4+T cells	CD4+T cells	T Cells	Nd145Di	pCREB	LPS	MS5	M	Mouse	median	35.69433594
R35W9_MS5_Ms_M_LPS.fcs	CD4+T cells	CD4+T cells	T Cells	Nd146Di	pPLCg2	LPS	MS5	M	Mouse	median	6.447151661
R35W9_MS5_Ms_M_LPS.fcs	CD4+T cells	CD4+T cells	T Cells	Sm147Di	pSTAT1	LPS	MS5	M	Mouse	median	1.854685247
R35W9_MS5_Ms_M_LPS.fcs	CD4+T cells	CD4+T cells	T Cells	Sm149Di	pSTAT5	LPS	MS5	M	Mouse	median	10.17006445
R35W9_MS5_Ms_M_LPS.fcs	CD4+T cells	CD4+T cells	T Cells	Sm150Di	pS6	LPS	MS5	M	Mouse	median	34.26866913
R35W9_MS5_Ms_M_LPS.fcs	CD4+T cells	CD4+T cells	T Cells	Sm152Di	pErk1/2	LPS	MS5	M	Mouse	median	10.06229687
R35W9_MS5_Ms_M_LPS.fcs	CD4+T cells	CD4+T cells	T Cells	Sm154Di	pP38	LPS	MS5	M	Mouse	median	4.145964622
R35W9_MS5_Ms_M_LPS.fcs	CD4+T cells	CD4+T cells	T Cells	Gd160Di	pZap70/Syk	LPS	MS5	M	Mouse	median	2.66817677
R35W9_MS5_Ms_M_LPS.fcs	CD4+T cells	CD4+T cells	T Cells	Dy161Di	pTBK1	LPS	MS5	M	Mouse	median	2.500150323
R35W9_MS5_Ms_M_LPS.fcs	CD4+T cells	CD4+T cells	T Cells	Ho165Di	pSTAT6	LPS	MS5	M	Mouse	median	9.71316576
R35W9_MS5_Ms_M_LPS.fcs	CD4+T cells	CD4+T cells	T Cells	Er170Di	pSTAT4	LPS	MS5	M	Mouse	median	3.17754662
R35W9_MS5_Ms_M_LPS.fcs	CD4+T cells	CD4+T cells	T Cells	Yb172Di	p4E-BP1	LPS	MS5	M	Mouse	median	6.718508959
R35W9_MS5_Ms_M_LPS.fcs	CD4+T cells	CD4+T cells	T Cells	Tm169Di	Ki67	LPS	MS5	M	Mouse	median	8.157697201
R35W9_MS5_Ms_M_LPS.fcs	CD4+T cells	CD4+T cells	T Cells	Dy163Di	IkBa	LPS	MS5	M	Mouse	median	17.59604931
R35W9_MS5_Ms_M_LPS.fcs	CD4+/CD8+	CD4+/CD8+	T Cells	La139Di	pSTAT3	LPS	MS5	M	Mouse	median	24.19494438
R35W9_MS5_Ms_M_LPS.fcs	CD4+/CD8+	CD4+/CD8+	T Cells	Nd144Di	pMAPKAPK2	LPS	MS5	M	Mouse	median	8.143424988
R35W9_MS5_Ms_M_LPS.fcs	CD4+/CD8+	CD4+/CD8+	T Cells	Nd145Di	pCREB	LPS	MS5	M	Mouse	median	57.75098991
R35W9_MS5_Ms_M_LPS.fcs	CD4+/CD8+	CD4+/CD8+	T Cells	Nd146Di	pPLCg2	LPS	MS5	M	Mouse	median	13.78132725
R35W9_MS5_Ms_M_LPS.fcs	CD4+/CD8+	CD4+/CD8+	T Cells	Sm147Di	pSTAT1	LPS	MS5	M	Mouse	median	3.002190471
R35W9_MS5_Ms_M_LPS.fcs	CD4+/CD8+	CD4+/CD8+	T Cells	Sm149Di	pSTAT5	LPS	MS5	M	Mouse	median	15.47818041
R35W9_MS5_Ms_M_LPS.fcs	CD4+/CD8+	CD4+/CD8+	T Cells	Sm150Di	pS6	LPS	MS5	M	Mouse	median	63.13573074
R35W9_MS5_Ms_M_LPS.fcs	CD4+/CD8+	CD4+/CD8+	T Cells	Sm152Di	pErk1/2	LPS	MS5	M	Mouse	median	17.6128788
R35W9_MS5_Ms_M_LPS.fcs	CD4+/CD8+	CD4+/CD8+	T Cells	Sm154Di	pP38	LPS	MS5	M	Mouse	median	6.844842672
R35W9_MS5_Ms_M_LPS.fcs	CD4+/CD8+	CD4+/CD8+	T Cells	Gd160Di	pZap70/Syk	LPS	MS5	M	Mouse	median	3.981344223
R35W9_MS5_Ms_M_LPS.fcs	CD4+/CD8+	CD4+/CD8+	T Cells	Dy161Di	pTBK1	LPS	MS5	M	Mouse	median	3.225533485
R35W9_MS5_Ms_M_LPS.fcs	CD4+/CD8+	CD4+/CD8+	T Cells	Ho165Di	pSTAT6	LPS	MS5	M	Mouse	median	15.93733406
R35W9_MS5_Ms_M_LPS.fcs	CD4+/CD8+	CD4+/CD8+	T Cells	Er170Di	pSTAT4	LPS	MS5	M	Mouse	median	4.458092213
R35W9_MS5_Ms_M_LPS.fcs	CD4+/CD8+	CD4+/CD8+	T Cells	Yb172Di	p4E-BP1	LPS	MS5	M	Mouse	median	6.435122728
R35W9_MS5_Ms_M_LPS.fcs	CD4+/CD8+	CD4+/CD8+	T Cells	Tm169Di	Ki67	LPS	MS5	M	Mouse	median	12.84645224
R35W9_MS5_Ms_M_LPS.fcs	CD4+/CD8+	CD4+/CD8+	T Cells	Dy163Di	IkBa	LPS	MS5	M	Mouse	median	32.4285202
R35W9_MS5_Ms_M_IL-2.fcs	Neutrophils	Neutrophils	Non-Basophils	La139Di	pSTAT3	IL-2	MS5	M	Mouse	median	36.63606644
R35W9_MS5_Ms_M_IL-2.fcs	Neutrophils	Neutrophils	Non-Basophils	Nd144Di	pMAPKAPK2	IL-2	MS5	M	Mouse	median	10.94641113
R35W9_MS5_Ms_M_IL-2.fcs	Neutrophils	Neutrophils	Non-Basophils	Nd145Di	pCREB	IL-2	MS5	M	Mouse	median	37.05472565
R35W9_MS5_Ms_M_IL-2.fcs	Neutrophils	Neutrophils	Non-Basophils	Nd146Di	pPLCg2	IL-2	MS5	M	Mouse	median	10.29192352
R35W9_MS5_Ms_M_IL-2.fcs	Neutrophils	Neutrophils	Non-Basophils	Sm147Di	pSTAT1	IL-2	MS5	M	Mouse	median	4.751870632
R35W9_MS5_Ms_M_IL-2.fcs	Neutrophils	Neutrophils	Non-Basophils	Sm149Di	pSTAT5	IL-2	MS5	M	Mouse	median	8.373744965
R35W9_MS5_Ms_M_IL-2.fcs	Neutrophils	Neutrophils	Non-Basophils	Sm150Di	pS6	IL-2	MS5	M	Mouse	median	78.58522797
R35W9_MS5_Ms_M_IL-2.fcs	Neutrophils	Neutrophils	Non-Basophils	Sm152Di	pErk1/2	IL-2	MS5	M	Mouse	median	23.84177017
R35W9_MS5_Ms_M_IL-2.fcs	Neutrophils	Neutrophils	Non-Basophils	Sm154Di	pP38	IL-2	MS5	M	Mouse	median	5.809558868
R35W9_MS5_Ms_M_IL-2.fcs	Neutrophils	Neutrophils	Non-Basophils	Gd160Di	pZap70/Syk	IL-2	MS5	M	Mouse	median	5.27955389
R35W9_MS5_Ms_M_IL-2.fcs	Neutrophils	Neutrophils	Non-Basophils	Dy161Di	pTBK1	IL-2	MS5	M	Mouse	median	2.677484751
R35W9_MS5_Ms_M_IL-2.fcs	Neutrophils	Neutrophils	Non-Basophils	Ho165Di	pSTAT6	IL-2	MS5	M	Mouse	median	4.861979485
R35W9_MS5_Ms_M_IL-2.fcs	Neutrophils	Neutrophils	Non-Basophils	Er170Di	pSTAT4	IL-2	MS5	M	Mouse	median	3.591694593
R35W9_MS5_Ms_M_IL-2.fcs	Neutrophils	Neutrophils	Non-Basophils	Yb172Di	p4E-BP1	IL-2	MS5	M	Mouse	median	7.352068424
R35W9_MS5_Ms_M_IL-2.fcs	Neutrophils	Neutrophils	Non-Basophils	Tm169Di	Ki67	IL-2	MS5	M	Mouse	median	49.46186829
R35W9_MS5_Ms_M_IL-2.fcs	Neutrophils	Neutrophils	Non-Basophils	Dy163Di	IkBa	IL-2	MS5	M	Mouse	median	5.818562508
R35W9_MS5_Ms_M_IL-2.fcs	B Cells	B Cells	CD45+ CD66-	La139Di	pSTAT3	IL-2	MS5	M	Mouse	median	21.00845337
R35W9_MS5_Ms_M_IL-2.fcs	B Cells	B Cells	CD45+ CD66-	Nd144Di	pMAPKAPK2	IL-2	MS5	M	Mouse	median	5.115221262
R35W9_MS5_Ms_M_IL-2.fcs	B Cells	B Cells	CD45+ CD66-	Nd145Di	pCREB	IL-2	MS5	M	Mouse	median	30.50514889
R35W9_MS5_Ms_M_IL-2.fcs	B Cells	B Cells	CD45+ CD66-	Nd146Di	pPLCg2	IL-2	MS5	M	Mouse	median	8.075026989
R35W9_MS5_Ms_M_IL-2.fcs	B Cells	B Cells	CD45+ CD66-	Sm147Di	pSTAT1	IL-2	MS5	M	Mouse	median	5.757642031
R35W9_MS5_Ms_M_IL-2.fcs	B Cells	B Cells	CD45+ CD66-	Sm149Di	pSTAT5	IL-2	MS5	M	Mouse	median	7.004720688
R35W9_MS5_Ms_M_IL-2.fcs	B Cells	B Cells	CD45+ CD66-	Sm150Di	pS6	IL-2	MS5	M	Mouse	median	31.33421612
R35W9_MS5_Ms_M_IL-2.fcs	B Cells	B Cells	CD45+ CD66-	Sm152Di	pErk1/2	IL-2	MS5	M	Mouse	median	6.88426137
R35W9_MS5_Ms_M_IL-2.fcs	B Cells	B Cells	CD45+ CD66-	Sm154Di	pP38	IL-2	MS5	M	Mouse	median	3.551505923
R35W9_MS5_Ms_M_IL-2.fcs	B Cells	B Cells	CD45+ CD66-	Gd160Di	pZap70/Syk	IL-2	MS5	M	Mouse	median	2.442085981
R35W9_MS5_Ms_M_IL-2.fcs	B Cells	B Cells	CD45+ CD66-	Dy161Di	pTBK1	IL-2	MS5	M	Mouse	median	4.042593002
R35W9_MS5_Ms_M_IL-2.fcs	B Cells	B Cells	CD45+ CD66-	Ho165Di	pSTAT6	IL-2	MS5	M	Mouse	median	9.311821938
R35W9_MS5_Ms_M_IL-2.fcs	B Cells	B Cells	CD45+ CD66-	Er170Di	pSTAT4	IL-2	MS5	M	Mouse	median	4.098600388
R35W9_MS5_Ms_M_IL-2.fcs	B Cells	B Cells	CD45+ CD66-	Yb172Di	p4E-BP1	IL-2	MS5	M	Mouse	median	11.54175329
R35W9_MS5_Ms_M_IL-2.fcs	B Cells	B Cells	CD45+ CD66-	Tm169Di	Ki67	IL-2	MS5	M	Mouse	median	9.458668232
R35W9_MS5_Ms_M_IL-2.fcs	B Cells	B Cells	CD45+ CD66-	Dy163Di	IkBa	IL-2	MS5	M	Mouse	median	25.12439251
R35W9_MS5_Ms_M_IL-2.fcs	Mouse Basophils	Mouse Basophils	ms NK1.1-	La139Di	pSTAT3	IL-2	MS5	M	Mouse	median	17.99138832
R35W9_MS5_Ms_M_IL-2.fcs	Mouse Basophils	Mouse Basophils	ms NK1.1-	Nd144Di	pMAPKAPK2	IL-2	MS5	M	Mouse	median	10.21140862
R35W9_MS5_Ms_M_IL-2.fcs	Mouse Basophils	Mouse Basophils	ms NK1.1-	Nd145Di	pCREB	IL-2	MS5	M	Mouse	median	42.22212982
R35W9_MS5_Ms_M_IL-2.fcs	Mouse Basophils	Mouse Basophils	ms NK1.1-	Nd146Di	pPLCg2	IL-2	MS5	M	Mouse	median	7.243431091
R35W9_MS5_Ms_M_IL-2.fcs	Mouse Basophils	Mouse Basophils	ms NK1.1-	Sm147Di	pSTAT1	IL-2	MS5	M	Mouse	median	2.906136751
R35W9_MS5_Ms_M_IL-2.fcs	Mouse Basophils	Mouse Basophils	ms NK1.1-	Sm149Di	pSTAT5	IL-2	MS5	M	Mouse	median	17.15029144
R35W9_MS5_Ms_M_IL-2.fcs	Mouse Basophils	Mouse Basophils	ms NK1.1-	Sm150Di	pS6	IL-2	MS5	M	Mouse	median	39.51320648
R35W9_MS5_Ms_M_IL-2.fcs	Mouse Basophils	Mouse Basophils	ms NK1.1-	Sm152Di	pErk1/2	IL-2	MS5	M	Mouse	median	14.12817574
R35W9_MS5_Ms_M_IL-2.fcs	Mouse Basophils	Mouse Basophils	ms NK1.1-	Sm154Di	pP38	IL-2	MS5	M	Mouse	median	7.661010265
R35W9_MS5_Ms_M_IL-2.fcs	Mouse Basophils	Mouse Basophils	ms NK1.1-	Gd160Di	pZap70/Syk	IL-2	MS5	M	Mouse	median	1.916895688
R35W9_MS5_Ms_M_IL-2.fcs	Mouse Basophils	Mouse Basophils	ms NK1.1-	Dy161Di	pTBK1	IL-2	MS5	M	Mouse	median	11.61840487
R35W9_MS5_Ms_M_IL-2.fcs	Mouse Basophils	Mouse Basophils	ms NK1.1-	Ho165Di	pSTAT6	IL-2	MS5	M	Mouse	median	18.03096771
R35W9_MS5_Ms_M_IL-2.fcs	Mouse Basophils	Mouse Basophils	ms NK1.1-	Er170Di	pSTAT4	IL-2	MS5	M	Mouse	median	4.234689236
R35W9_MS5_Ms_M_IL-2.fcs	Mouse Basophils	Mouse Basophils	ms NK1.1-	Yb172Di	p4E-BP1	IL-2	MS5	M	Mouse	median	8.128656387
R35W9_MS5_Ms_M_IL-2.fcs	Mouse Basophils	Mouse Basophils	ms NK1.1-	Tm169Di	Ki67	IL-2	MS5	M	Mouse	median	133.3639603
R35W9_MS5_Ms_M_IL-2.fcs	Mouse Basophils	Mouse Basophils	ms NK1.1-	Dy163Di	IkBa	IL-2	MS5	M	Mouse	median	38.29014969
R35W9_MS5_Ms_M_IL-2.fcs	ms NK1.1+/CD115-	ms NK1.1+/CD115-	CD19- CD3-	La139Di	pSTAT3	IL-2	MS5	M	Mouse	median	12.208148
R35W9_MS5_Ms_M_IL-2.fcs	ms NK1.1+/CD115-	ms NK1.1+/CD115-	CD19- CD3-	Nd144Di	pMAPKAPK2	IL-2	MS5	M	Mouse	median	5.514005661
R35W9_MS5_Ms_M_IL-2.fcs	ms NK1.1+/CD115-	ms NK1.1+/CD115-	CD19- CD3-	Nd145Di	pCREB	IL-2	MS5	M	Mouse	median	33.1749649
R35W9_MS5_Ms_M_IL-2.fcs	ms NK1.1+/CD115-	ms NK1.1+/CD115-	CD19- CD3-	Nd146Di	pPLCg2	IL-2	MS5	M	Mouse	median	8.28164959
R35W9_MS5_Ms_M_IL-2.fcs	ms NK1.1+/CD115-	ms NK1.1+/CD115-	CD19- CD3-	Sm147Di	pSTAT1	IL-2	MS5	M	Mouse	median	2.169824123
R35W9_MS5_Ms_M_IL-2.fcs	ms NK1.1+/CD115-	ms NK1.1+/CD115-	CD19- CD3-	Sm149Di	pSTAT5	IL-2	MS5	M	Mouse	median	19.38182449
R35W9_MS5_Ms_M_IL-2.fcs	ms NK1.1+/CD115-	ms NK1.1+/CD115-	CD19- CD3-	Sm150Di	pS6	IL-2	MS5	M	Mouse	median	25.99094009
R35W9_MS5_Ms_M_IL-2.fcs	ms NK1.1+/CD115-	ms NK1.1+/CD115-	CD19- CD3-	Sm152Di	pErk1/2	IL-2	MS5	M	Mouse	median	8.778975487
R35W9_MS5_Ms_M_IL-2.fcs	ms NK1.1+/CD115-	ms NK1.1+/CD115-	CD19- CD3-	Sm154Di	pP38	IL-2	MS5	M	Mouse	median	4.011748314
R35W9_MS5_Ms_M_IL-2.fcs	ms NK1.1+/CD115-	ms NK1.1+/CD115-	CD19- CD3-	Gd160Di	pZap70/Syk	IL-2	MS5	M	Mouse	median	1.758567214
R35W9_MS5_Ms_M_IL-2.fcs	ms NK1.1+/CD115-	ms NK1.1+/CD115-	CD19- CD3-	Dy161Di	pTBK1	IL-2	MS5	M	Mouse	median	3.545459509
R35W9_MS5_Ms_M_IL-2.fcs	ms NK1.1+/CD115-	ms NK1.1+/CD115-	CD19- CD3-	Ho165Di	pSTAT6	IL-2	MS5	M	Mouse	median	11.830019
R35W9_MS5_Ms_M_IL-2.fcs	ms NK1.1+/CD115-	ms NK1.1+/CD115-	CD19- CD3-	Er170Di	pSTAT4	IL-2	MS5	M	Mouse	median	6.520933151
R35W9_MS5_Ms_M_IL-2.fcs	ms NK1.1+/CD115-	ms NK1.1+/CD115-	CD19- CD3-	Yb172Di	p4E-BP1	IL-2	MS5	M	Mouse	median	6.959756374
R35W9_MS5_Ms_M_IL-2.fcs	ms NK1.1+/CD115-	ms NK1.1+/CD115-	CD19- CD3-	Tm169Di	Ki67	IL-2	MS5	M	Mouse	median	12.63702965
R35W9_MS5_Ms_M_IL-2.fcs	ms NK1.1+/CD115-	ms NK1.1+/CD115-	CD19- CD3-	Dy163Di	IkBa	IL-2	MS5	M	Mouse	median	19.01373672
R35W9_MS5_Ms_M_IL-2.fcs	Mouse pDCs	Mouse pDCs	FcεRIα-	La139Di	pSTAT3	IL-2	MS5	M	Mouse	median	35.00028419
R35W9_MS5_Ms_M_IL-2.fcs	Mouse pDCs	Mouse pDCs	FcεRIα-	Nd144Di	pMAPKAPK2	IL-2	MS5	M	Mouse	median	7.100580454
R35W9_MS5_Ms_M_IL-2.fcs	Mouse pDCs	Mouse pDCs	FcεRIα-	Nd145Di	pCREB	IL-2	MS5	M	Mouse	median	29.48677731
R35W9_MS5_Ms_M_IL-2.fcs	Mouse pDCs	Mouse pDCs	FcεRIα-	Nd146Di	pPLCg2	IL-2	MS5	M	Mouse	median	24.44246101
R35W9_MS5_Ms_M_IL-2.fcs	Mouse pDCs	Mouse pDCs	FcεRIα-	Sm147Di	pSTAT1	IL-2	MS5	M	Mouse	median	5.669719696
R35W9_MS5_Ms_M_IL-2.fcs	Mouse pDCs	Mouse pDCs	FcεRIα-	Sm149Di	pSTAT5	IL-2	MS5	M	Mouse	median	11.3681488
R35W9_MS5_Ms_M_IL-2.fcs	Mouse pDCs	Mouse pDCs	FcεRIα-	Sm150Di	pS6	IL-2	MS5	M	Mouse	median	47.63995171
R35W9_MS5_Ms_M_IL-2.fcs	Mouse pDCs	Mouse pDCs	FcεRIα-	Sm152Di	pErk1/2	IL-2	MS5	M	Mouse	median	12.98115587
R35W9_MS5_Ms_M_IL-2.fcs	Mouse pDCs	Mouse pDCs	FcεRIα-	Sm154Di	pP38	IL-2	MS5	M	Mouse	median	5.786632776
R35W9_MS5_Ms_M_IL-2.fcs	Mouse pDCs	Mouse pDCs	FcεRIα-	Gd160Di	pZap70/Syk	IL-2	MS5	M	Mouse	median	3.052611828
R35W9_MS5_Ms_M_IL-2.fcs	Mouse pDCs	Mouse pDCs	FcεRIα-	Dy161Di	pTBK1	IL-2	MS5	M	Mouse	median	2.848640442
R35W9_MS5_Ms_M_IL-2.fcs	Mouse pDCs	Mouse pDCs	FcεRIα-	Ho165Di	pSTAT6	IL-2	MS5	M	Mouse	median	19.83093452
R35W9_MS5_Ms_M_IL-2.fcs	Mouse pDCs	Mouse pDCs	FcεRIα-	Er170Di	pSTAT4	IL-2	MS5	M	Mouse	median	5.628170967
R35W9_MS5_Ms_M_IL-2.fcs	Mouse pDCs	Mouse pDCs	FcεRIα-	Yb172Di	p4E-BP1	IL-2	MS5	M	Mouse	median	9.532253742
R35W9_MS5_Ms_M_IL-2.fcs	Mouse pDCs	Mouse pDCs	FcεRIα-	Tm169Di	Ki67	IL-2	MS5	M	Mouse	median	18.92337418
R35W9_MS5_Ms_M_IL-2.fcs	Mouse pDCs	Mouse pDCs	FcεRIα-	Dy163Di	IkBa	IL-2	MS5	M	Mouse	median	11.4302392
R35W9_MS5_Ms_M_IL-2.fcs	Mouse Ly6C+	Mouse Ly6C+	ms CD115+/NK1.1-	La139Di	pSTAT3	IL-2	MS5	M	Mouse	median	26.23406982
R35W9_MS5_Ms_M_IL-2.fcs	Mouse Ly6C+	Mouse Ly6C+	ms CD115+/NK1.1-	Nd144Di	pMAPKAPK2	IL-2	MS5	M	Mouse	median	7.75305748
R35W9_MS5_Ms_M_IL-2.fcs	Mouse Ly6C+	Mouse Ly6C+	ms CD115+/NK1.1-	Nd145Di	pCREB	IL-2	MS5	M	Mouse	median	28.93740845
R35W9_MS5_Ms_M_IL-2.fcs	Mouse Ly6C+	Mouse Ly6C+	ms CD115+/NK1.1-	Nd146Di	pPLCg2	IL-2	MS5	M	Mouse	median	11.66443825
R35W9_MS5_Ms_M_IL-2.fcs	Mouse Ly6C+	Mouse Ly6C+	ms CD115+/NK1.1-	Sm147Di	pSTAT1	IL-2	MS5	M	Mouse	median	3.541083574
R35W9_MS5_Ms_M_IL-2.fcs	Mouse Ly6C+	Mouse Ly6C+	ms CD115+/NK1.1-	Sm149Di	pSTAT5	IL-2	MS5	M	Mouse	median	15.99943542
R35W9_MS5_Ms_M_IL-2.fcs	Mouse Ly6C+	Mouse Ly6C+	ms CD115+/NK1.1-	Sm150Di	pS6	IL-2	MS5	M	Mouse	median	85.92194366
R35W9_MS5_Ms_M_IL-2.fcs	Mouse Ly6C+	Mouse Ly6C+	ms CD115+/NK1.1-	Sm152Di	pErk1/2	IL-2	MS5	M	Mouse	median	11.04328442
R35W9_MS5_Ms_M_IL-2.fcs	Mouse Ly6C+	Mouse Ly6C+	ms CD115+/NK1.1-	Sm154Di	pP38	IL-2	MS5	M	Mouse	median	4.468656063
R35W9_MS5_Ms_M_IL-2.fcs	Mouse Ly6C+	Mouse Ly6C+	ms CD115+/NK1.1-	Gd160Di	pZap70/Syk	IL-2	MS5	M	Mouse	median	1.787466884
R35W9_MS5_Ms_M_IL-2.fcs	Mouse Ly6C+	Mouse Ly6C+	ms CD115+/NK1.1-	Dy161Di	pTBK1	IL-2	MS5	M	Mouse	median	5.331371307
R35W9_MS5_Ms_M_IL-2.fcs	Mouse Ly6C+	Mouse Ly6C+	ms CD115+/NK1.1-	Ho165Di	pSTAT6	IL-2	MS5	M	Mouse	median	10.9526844
R35W9_MS5_Ms_M_IL-2.fcs	Mouse Ly6C+	Mouse Ly6C+	ms CD115+/NK1.1-	Er170Di	pSTAT4	IL-2	MS5	M	Mouse	median	4.770591259
R35W9_MS5_Ms_M_IL-2.fcs	Mouse Ly6C+	Mouse Ly6C+	ms CD115+/NK1.1-	Yb172Di	p4E-BP1	IL-2	MS5	M	Mouse	median	21.61813927
R35W9_MS5_Ms_M_IL-2.fcs	Mouse Ly6C+	Mouse Ly6C+	ms CD115+/NK1.1-	Tm169Di	Ki67	IL-2	MS5	M	Mouse	median	118.0607224
R35W9_MS5_Ms_M_IL-2.fcs	Mouse Ly6C+	Mouse Ly6C+	ms CD115+/NK1.1-	Dy163Di	IkBa	IL-2	MS5	M	Mouse	median	34.17126465
R35W9_MS5_Ms_M_IL-2.fcs	Mouse Ly6C-	Mouse Ly6C-	ms CD115+/NK1.1-	La139Di	pSTAT3	IL-2	MS5	M	Mouse	median	17.52043438
R35W9_MS5_Ms_M_IL-2.fcs	Mouse Ly6C-	Mouse Ly6C-	ms CD115+/NK1.1-	Nd144Di	pMAPKAPK2	IL-2	MS5	M	Mouse	median	7.285437107
R35W9_MS5_Ms_M_IL-2.fcs	Mouse Ly6C-	Mouse Ly6C-	ms CD115+/NK1.1-	Nd145Di	pCREB	IL-2	MS5	M	Mouse	median	32.41439629
R35W9_MS5_Ms_M_IL-2.fcs	Mouse Ly6C-	Mouse Ly6C-	ms CD115+/NK1.1-	Nd146Di	pPLCg2	IL-2	MS5	M	Mouse	median	22.48696995
R35W9_MS5_Ms_M_IL-2.fcs	Mouse Ly6C-	Mouse Ly6C-	ms CD115+/NK1.1-	Sm147Di	pSTAT1	IL-2	MS5	M	Mouse	median	2.495401144
R35W9_MS5_Ms_M_IL-2.fcs	Mouse Ly6C-	Mouse Ly6C-	ms CD115+/NK1.1-	Sm149Di	pSTAT5	IL-2	MS5	M	Mouse	median	11.53803825
R35W9_MS5_Ms_M_IL-2.fcs	Mouse Ly6C-	Mouse Ly6C-	ms CD115+/NK1.1-	Sm150Di	pS6	IL-2	MS5	M	Mouse	median	52.71549988
R35W9_MS5_Ms_M_IL-2.fcs	Mouse Ly6C-	Mouse Ly6C-	ms CD115+/NK1.1-	Sm152Di	pErk1/2	IL-2	MS5	M	Mouse	median	8.712630749
R35W9_MS5_Ms_M_IL-2.fcs	Mouse Ly6C-	Mouse Ly6C-	ms CD115+/NK1.1-	Sm154Di	pP38	IL-2	MS5	M	Mouse	median	4.629360199
R35W9_MS5_Ms_M_IL-2.fcs	Mouse Ly6C-	Mouse Ly6C-	ms CD115+/NK1.1-	Gd160Di	pZap70/Syk	IL-2	MS5	M	Mouse	median	2.806981444
R35W9_MS5_Ms_M_IL-2.fcs	Mouse Ly6C-	Mouse Ly6C-	ms CD115+/NK1.1-	Dy161Di	pTBK1	IL-2	MS5	M	Mouse	median	6.399632215
R35W9_MS5_Ms_M_IL-2.fcs	Mouse Ly6C-	Mouse Ly6C-	ms CD115+/NK1.1-	Ho165Di	pSTAT6	IL-2	MS5	M	Mouse	median	10.22885323
R35W9_MS5_Ms_M_IL-2.fcs	Mouse Ly6C-	Mouse Ly6C-	ms CD115+/NK1.1-	Er170Di	pSTAT4	IL-2	MS5	M	Mouse	median	5.989512444
R35W9_MS5_Ms_M_IL-2.fcs	Mouse Ly6C-	Mouse Ly6C-	ms CD115+/NK1.1-	Yb172Di	p4E-BP1	IL-2	MS5	M	Mouse	median	18.55365372
R35W9_MS5_Ms_M_IL-2.fcs	Mouse Ly6C-	Mouse Ly6C-	ms CD115+/NK1.1-	Tm169Di	Ki67	IL-2	MS5	M	Mouse	median	15.99354649
R35W9_MS5_Ms_M_IL-2.fcs	Mouse Ly6C-	Mouse Ly6C-	ms CD115+/NK1.1-	Dy163Di	IkBa	IL-2	MS5	M	Mouse	median	36.33012581
R35W9_MS5_Ms_M_IL-2.fcs	CD8+T cells	CD8+T cells	T Cells	La139Di	pSTAT3	IL-2	MS5	M	Mouse	median	15.70512867
R35W9_MS5_Ms_M_IL-2.fcs	CD8+T cells	CD8+T cells	T Cells	Nd144Di	pMAPKAPK2	IL-2	MS5	M	Mouse	median	5.871405125
R35W9_MS5_Ms_M_IL-2.fcs	CD8+T cells	CD8+T cells	T Cells	Nd145Di	pCREB	IL-2	MS5	M	Mouse	median	31.61245155
R35W9_MS5_Ms_M_IL-2.fcs	CD8+T cells	CD8+T cells	T Cells	Nd146Di	pPLCg2	IL-2	MS5	M	Mouse	median	9.142035484
R35W9_MS5_Ms_M_IL-2.fcs	CD8+T cells	CD8+T cells	T Cells	Sm147Di	pSTAT1	IL-2	MS5	M	Mouse	median	2.132002354
R35W9_MS5_Ms_M_IL-2.fcs	CD8+T cells	CD8+T cells	T Cells	Sm149Di	pSTAT5	IL-2	MS5	M	Mouse	median	22.77915955
R35W9_MS5_Ms_M_IL-2.fcs	CD8+T cells	CD8+T cells	T Cells	Sm150Di	pS6	IL-2	MS5	M	Mouse	median	40.24729156
R35W9_MS5_Ms_M_IL-2.fcs	CD8+T cells	CD8+T cells	T Cells	Sm152Di	pErk1/2	IL-2	MS5	M	Mouse	median	10.11950493
R35W9_MS5_Ms_M_IL-2.fcs	CD8+T cells	CD8+T cells	T Cells	Sm154Di	pP38	IL-2	MS5	M	Mouse	median	5.706034184
R35W9_MS5_Ms_M_IL-2.fcs	CD8+T cells	CD8+T cells	T Cells	Gd160Di	pZap70/Syk	IL-2	MS5	M	Mouse	median	2.71163559
R35W9_MS5_Ms_M_IL-2.fcs	CD8+T cells	CD8+T cells	T Cells	Dy161Di	pTBK1	IL-2	MS5	M	Mouse	median	2.835492849
R35W9_MS5_Ms_M_IL-2.fcs	CD8+T cells	CD8+T cells	T Cells	Ho165Di	pSTAT6	IL-2	MS5	M	Mouse	median	10.70179558
R35W9_MS5_Ms_M_IL-2.fcs	CD8+T cells	CD8+T cells	T Cells	Er170Di	pSTAT4	IL-2	MS5	M	Mouse	median	4.15978384
R35W9_MS5_Ms_M_IL-2.fcs	CD8+T cells	CD8+T cells	T Cells	Yb172Di	p4E-BP1	IL-2	MS5	M	Mouse	median	5.845590591
R35W9_MS5_Ms_M_IL-2.fcs	CD8+T cells	CD8+T cells	T Cells	Tm169Di	Ki67	IL-2	MS5	M	Mouse	median	9.825493813
R35W9_MS5_Ms_M_IL-2.fcs	CD8+T cells	CD8+T cells	T Cells	Dy163Di	IkBa	IL-2	MS5	M	Mouse	median	19.27252579
R35W9_MS5_Ms_M_IL-2.fcs	CD4+T cells	CD4+T cells	T Cells	La139Di	pSTAT3	IL-2	MS5	M	Mouse	median	15.3451066
R35W9_MS5_Ms_M_IL-2.fcs	CD4+T cells	CD4+T cells	T Cells	Nd144Di	pMAPKAPK2	IL-2	MS5	M	Mouse	median	6.180584192
R35W9_MS5_Ms_M_IL-2.fcs	CD4+T cells	CD4+T cells	T Cells	Nd145Di	pCREB	IL-2	MS5	M	Mouse	median	42.53955078
R35W9_MS5_Ms_M_IL-2.fcs	CD4+T cells	CD4+T cells	T Cells	Nd146Di	pPLCg2	IL-2	MS5	M	Mouse	median	7.650816202
R35W9_MS5_Ms_M_IL-2.fcs	CD4+T cells	CD4+T cells	T Cells	Sm147Di	pSTAT1	IL-2	MS5	M	Mouse	median	1.973979652
R35W9_MS5_Ms_M_IL-2.fcs	CD4+T cells	CD4+T cells	T Cells	Sm149Di	pSTAT5	IL-2	MS5	M	Mouse	median	14.39384031
R35W9_MS5_Ms_M_IL-2.fcs	CD4+T cells	CD4+T cells	T Cells	Sm150Di	pS6	IL-2	MS5	M	Mouse	median	37.13861465
R35W9_MS5_Ms_M_IL-2.fcs	CD4+T cells	CD4+T cells	T Cells	Sm152Di	pErk1/2	IL-2	MS5	M	Mouse	median	10.20939159
R35W9_MS5_Ms_M_IL-2.fcs	CD4+T cells	CD4+T cells	T Cells	Sm154Di	pP38	IL-2	MS5	M	Mouse	median	4.681721926
R35W9_MS5_Ms_M_IL-2.fcs	CD4+T cells	CD4+T cells	T Cells	Gd160Di	pZap70/Syk	IL-2	MS5	M	Mouse	median	2.705244064
R35W9_MS5_Ms_M_IL-2.fcs	CD4+T cells	CD4+T cells	T Cells	Dy161Di	pTBK1	IL-2	MS5	M	Mouse	median	2.55982697
R35W9_MS5_Ms_M_IL-2.fcs	CD4+T cells	CD4+T cells	T Cells	Ho165Di	pSTAT6	IL-2	MS5	M	Mouse	median	9.731347561
R35W9_MS5_Ms_M_IL-2.fcs	CD4+T cells	CD4+T cells	T Cells	Er170Di	pSTAT4	IL-2	MS5	M	Mouse	median	3.463575959
R35W9_MS5_Ms_M_IL-2.fcs	CD4+T cells	CD4+T cells	T Cells	Yb172Di	p4E-BP1	IL-2	MS5	M	Mouse	median	7.199360132
R35W9_MS5_Ms_M_IL-2.fcs	CD4+T cells	CD4+T cells	T Cells	Tm169Di	Ki67	IL-2	MS5	M	Mouse	median	8.788311481
R35W9_MS5_Ms_M_IL-2.fcs	CD4+T cells	CD4+T cells	T Cells	Dy163Di	IkBa	IL-2	MS5	M	Mouse	median	19.67681789
R35W9_MS5_Ms_M_IL-2.fcs	CD4+/CD8+	CD4+/CD8+	T Cells	La139Di	pSTAT3	IL-2	MS5	M	Mouse	median	27.38456154
R35W9_MS5_Ms_M_IL-2.fcs	CD4+/CD8+	CD4+/CD8+	T Cells	Nd144Di	pMAPKAPK2	IL-2	MS5	M	Mouse	median	9.776391029
R35W9_MS5_Ms_M_IL-2.fcs	CD4+/CD8+	CD4+/CD8+	T Cells	Nd145Di	pCREB	IL-2	MS5	M	Mouse	median	53.85617065
R35W9_MS5_Ms_M_IL-2.fcs	CD4+/CD8+	CD4+/CD8+	T Cells	Nd146Di	pPLCg2	IL-2	MS5	M	Mouse	median	15.83295631
R35W9_MS5_Ms_M_IL-2.fcs	CD4+/CD8+	CD4+/CD8+	T Cells	Sm147Di	pSTAT1	IL-2	MS5	M	Mouse	median	3.935527802
R35W9_MS5_Ms_M_IL-2.fcs	CD4+/CD8+	CD4+/CD8+	T Cells	Sm149Di	pSTAT5	IL-2	MS5	M	Mouse	median	23.22918129
R35W9_MS5_Ms_M_IL-2.fcs	CD4+/CD8+	CD4+/CD8+	T Cells	Sm150Di	pS6	IL-2	MS5	M	Mouse	median	67.13208771
R35W9_MS5_Ms_M_IL-2.fcs	CD4+/CD8+	CD4+/CD8+	T Cells	Sm152Di	pErk1/2	IL-2	MS5	M	Mouse	median	16.27525139
R35W9_MS5_Ms_M_IL-2.fcs	CD4+/CD8+	CD4+/CD8+	T Cells	Sm154Di	pP38	IL-2	MS5	M	Mouse	median	8.709323883
R35W9_MS5_Ms_M_IL-2.fcs	CD4+/CD8+	CD4+/CD8+	T Cells	Gd160Di	pZap70/Syk	IL-2	MS5	M	Mouse	median	4.256567478
R35W9_MS5_Ms_M_IL-2.fcs	CD4+/CD8+	CD4+/CD8+	T Cells	Dy161Di	pTBK1	IL-2	MS5	M	Mouse	median	3.770556211
R35W9_MS5_Ms_M_IL-2.fcs	CD4+/CD8+	CD4+/CD8+	T Cells	Ho165Di	pSTAT6	IL-2	MS5	M	Mouse	median	16.90752411
R35W9_MS5_Ms_M_IL-2.fcs	CD4+/CD8+	CD4+/CD8+	T Cells	Er170Di	pSTAT4	IL-2	MS5	M	Mouse	median	5.237129688
R35W9_MS5_Ms_M_IL-2.fcs	CD4+/CD8+	CD4+/CD8+	T Cells	Yb172Di	p4E-BP1	IL-2	MS5	M	Mouse	median	10.4574728
R35W9_MS5_Ms_M_IL-2.fcs	CD4+/CD8+	CD4+/CD8+	T Cells	Tm169Di	Ki67	IL-2	MS5	M	Mouse	median	14.34139538
R35W9_MS5_Ms_M_IL-2.fcs	CD4+/CD8+	CD4+/CD8+	T Cells	Dy163Di	IkBa	IL-2	MS5	M	Mouse	median	28.04686546
R35W9_MS5_Ms_M_R848.fcs	Neutrophils	Neutrophils	Non-Basophils	La139Di	pSTAT3	R848	MS5	M	Mouse	median	40.05975342
R35W9_MS5_Ms_M_R848.fcs	Neutrophils	Neutrophils	Non-Basophils	Nd144Di	pMAPKAPK2	R848	MS5	M	Mouse	median	10.87806511
R35W9_MS5_Ms_M_R848.fcs	Neutrophils	Neutrophils	Non-Basophils	Nd145Di	pCREB	R848	MS5	M	Mouse	median	34.26835251
R35W9_MS5_Ms_M_R848.fcs	Neutrophils	Neutrophils	Non-Basophils	Nd146Di	pPLCg2	R848	MS5	M	Mouse	median	9.157067299
R35W9_MS5_Ms_M_R848.fcs	Neutrophils	Neutrophils	Non-Basophils	Sm147Di	pSTAT1	R848	MS5	M	Mouse	median	4.683691025
R35W9_MS5_Ms_M_R848.fcs	Neutrophils	Neutrophils	Non-Basophils	Sm149Di	pSTAT5	R848	MS5	M	Mouse	median	8.00807476
R35W9_MS5_Ms_M_R848.fcs	Neutrophils	Neutrophils	Non-Basophils	Sm150Di	pS6	R848	MS5	M	Mouse	median	64.53517151
R35W9_MS5_Ms_M_R848.fcs	Neutrophils	Neutrophils	Non-Basophils	Sm152Di	pErk1/2	R848	MS5	M	Mouse	median	21.89083862
R35W9_MS5_Ms_M_R848.fcs	Neutrophils	Neutrophils	Non-Basophils	Sm154Di	pP38	R848	MS5	M	Mouse	median	5.706447601
R35W9_MS5_Ms_M_R848.fcs	Neutrophils	Neutrophils	Non-Basophils	Gd160Di	pZap70/Syk	R848	MS5	M	Mouse	median	4.535979748
R35W9_MS5_Ms_M_R848.fcs	Neutrophils	Neutrophils	Non-Basophils	Dy161Di	pTBK1	R848	MS5	M	Mouse	median	2.317485094
R35W9_MS5_Ms_M_R848.fcs	Neutrophils	Neutrophils	Non-Basophils	Ho165Di	pSTAT6	R848	MS5	M	Mouse	median	4.418472767
R35W9_MS5_Ms_M_R848.fcs	Neutrophils	Neutrophils	Non-Basophils	Er170Di	pSTAT4	R848	MS5	M	Mouse	median	3.091675997
R35W9_MS5_Ms_M_R848.fcs	Neutrophils	Neutrophils	Non-Basophils	Yb172Di	p4E-BP1	R848	MS5	M	Mouse	median	6.021137714
R35W9_MS5_Ms_M_R848.fcs	Neutrophils	Neutrophils	Non-Basophils	Tm169Di	Ki67	R848	MS5	M	Mouse	median	49.16267776
R35W9_MS5_Ms_M_R848.fcs	Neutrophils	Neutrophils	Non-Basophils	Dy163Di	IkBa	R848	MS5	M	Mouse	median	4.534209251
R35W9_MS5_Ms_M_R848.fcs	B Cells	B Cells	CD45+ CD66-	La139Di	pSTAT3	R848	MS5	M	Mouse	median	21.09314537
R35W9_MS5_Ms_M_R848.fcs	B Cells	B Cells	CD45+ CD66-	Nd144Di	pMAPKAPK2	R848	MS5	M	Mouse	median	5.102523804
R35W9_MS5_Ms_M_R848.fcs	B Cells	B Cells	CD45+ CD66-	Nd145Di	pCREB	R848	MS5	M	Mouse	median	26.30071926
R35W9_MS5_Ms_M_R848.fcs	B Cells	B Cells	CD45+ CD66-	Nd146Di	pPLCg2	R848	MS5	M	Mouse	median	7.330334425
R35W9_MS5_Ms_M_R848.fcs	B Cells	B Cells	CD45+ CD66-	Sm147Di	pSTAT1	R848	MS5	M	Mouse	median	6.048773766
R35W9_MS5_Ms_M_R848.fcs	B Cells	B Cells	CD45+ CD66-	Sm149Di	pSTAT5	R848	MS5	M	Mouse	median	6.554359436
R35W9_MS5_Ms_M_R848.fcs	B Cells	B Cells	CD45+ CD66-	Sm150Di	pS6	R848	MS5	M	Mouse	median	29.36418629
R35W9_MS5_Ms_M_R848.fcs	B Cells	B Cells	CD45+ CD66-	Sm152Di	pErk1/2	R848	MS5	M	Mouse	median	6.764191866
R35W9_MS5_Ms_M_R848.fcs	B Cells	B Cells	CD45+ CD66-	Sm154Di	pP38	R848	MS5	M	Mouse	median	3.32226193
R35W9_MS5_Ms_M_R848.fcs	B Cells	B Cells	CD45+ CD66-	Gd160Di	pZap70/Syk	R848	MS5	M	Mouse	median	2.263453245
R35W9_MS5_Ms_M_R848.fcs	B Cells	B Cells	CD45+ CD66-	Dy161Di	pTBK1	R848	MS5	M	Mouse	median	4.319139719
R35W9_MS5_Ms_M_R848.fcs	B Cells	B Cells	CD45+ CD66-	Ho165Di	pSTAT6	R848	MS5	M	Mouse	median	9.187533379
R35W9_MS5_Ms_M_R848.fcs	B Cells	B Cells	CD45+ CD66-	Er170Di	pSTAT4	R848	MS5	M	Mouse	median	3.929094553
R35W9_MS5_Ms_M_R848.fcs	B Cells	B Cells	CD45+ CD66-	Yb172Di	p4E-BP1	R848	MS5	M	Mouse	median	11.35646915
R35W9_MS5_Ms_M_R848.fcs	B Cells	B Cells	CD45+ CD66-	Tm169Di	Ki67	R848	MS5	M	Mouse	median	8.850491047
R35W9_MS5_Ms_M_R848.fcs	B Cells	B Cells	CD45+ CD66-	Dy163Di	IkBa	R848	MS5	M	Mouse	median	24.2807169
R35W9_MS5_Ms_M_R848.fcs	Mouse Basophils	Mouse Basophils	ms NK1.1-	La139Di	pSTAT3	R848	MS5	M	Mouse	median	19.6332798
R35W9_MS5_Ms_M_R848.fcs	Mouse Basophils	Mouse Basophils	ms NK1.1-	Nd144Di	pMAPKAPK2	R848	MS5	M	Mouse	median	10.70302105
R35W9_MS5_Ms_M_R848.fcs	Mouse Basophils	Mouse Basophils	ms NK1.1-	Nd145Di	pCREB	R848	MS5	M	Mouse	median	38.97126389
R35W9_MS5_Ms_M_R848.fcs	Mouse Basophils	Mouse Basophils	ms NK1.1-	Nd146Di	pPLCg2	R848	MS5	M	Mouse	median	6.039100647
R35W9_MS5_Ms_M_R848.fcs	Mouse Basophils	Mouse Basophils	ms NK1.1-	Sm147Di	pSTAT1	R848	MS5	M	Mouse	median	3.085608006
R35W9_MS5_Ms_M_R848.fcs	Mouse Basophils	Mouse Basophils	ms NK1.1-	Sm149Di	pSTAT5	R848	MS5	M	Mouse	median	7.43625927
R35W9_MS5_Ms_M_R848.fcs	Mouse Basophils	Mouse Basophils	ms NK1.1-	Sm150Di	pS6	R848	MS5	M	Mouse	median	35.38908005
R35W9_MS5_Ms_M_R848.fcs	Mouse Basophils	Mouse Basophils	ms NK1.1-	Sm152Di	pErk1/2	R848	MS5	M	Mouse	median	13.26632309
R35W9_MS5_Ms_M_R848.fcs	Mouse Basophils	Mouse Basophils	ms NK1.1-	Sm154Di	pP38	R848	MS5	M	Mouse	median	6.486780643
R35W9_MS5_Ms_M_R848.fcs	Mouse Basophils	Mouse Basophils	ms NK1.1-	Gd160Di	pZap70/Syk	R848	MS5	M	Mouse	median	2.001779079
R35W9_MS5_Ms_M_R848.fcs	Mouse Basophils	Mouse Basophils	ms NK1.1-	Dy161Di	pTBK1	R848	MS5	M	Mouse	median	13.16281128
R35W9_MS5_Ms_M_R848.fcs	Mouse Basophils	Mouse Basophils	ms NK1.1-	Ho165Di	pSTAT6	R848	MS5	M	Mouse	median	17.96595573
R35W9_MS5_Ms_M_R848.fcs	Mouse Basophils	Mouse Basophils	ms NK1.1-	Er170Di	pSTAT4	R848	MS5	M	Mouse	median	4.315532207
R35W9_MS5_Ms_M_R848.fcs	Mouse Basophils	Mouse Basophils	ms NK1.1-	Yb172Di	p4E-BP1	R848	MS5	M	Mouse	median	7.73225832
R35W9_MS5_Ms_M_R848.fcs	Mouse Basophils	Mouse Basophils	ms NK1.1-	Tm169Di	Ki67	R848	MS5	M	Mouse	median	118.3014526
R35W9_MS5_Ms_M_R848.fcs	Mouse Basophils	Mouse Basophils	ms NK1.1-	Dy163Di	IkBa	R848	MS5	M	Mouse	median	40.94140625
R35W9_MS5_Ms_M_R848.fcs	ms NK1.1+/CD115-	ms NK1.1+/CD115-	CD19- CD3-	La139Di	pSTAT3	R848	MS5	M	Mouse	median	11.82933903
R35W9_MS5_Ms_M_R848.fcs	ms NK1.1+/CD115-	ms NK1.1+/CD115-	CD19- CD3-	Nd144Di	pMAPKAPK2	R848	MS5	M	Mouse	median	4.855877638
R35W9_MS5_Ms_M_R848.fcs	ms NK1.1+/CD115-	ms NK1.1+/CD115-	CD19- CD3-	Nd145Di	pCREB	R848	MS5	M	Mouse	median	22.05642986
R35W9_MS5_Ms_M_R848.fcs	ms NK1.1+/CD115-	ms NK1.1+/CD115-	CD19- CD3-	Nd146Di	pPLCg2	R848	MS5	M	Mouse	median	6.592866182
R35W9_MS5_Ms_M_R848.fcs	ms NK1.1+/CD115-	ms NK1.1+/CD115-	CD19- CD3-	Sm147Di	pSTAT1	R848	MS5	M	Mouse	median	1.95318687
R35W9_MS5_Ms_M_R848.fcs	ms NK1.1+/CD115-	ms NK1.1+/CD115-	CD19- CD3-	Sm149Di	pSTAT5	R848	MS5	M	Mouse	median	7.417079449
R35W9_MS5_Ms_M_R848.fcs	ms NK1.1+/CD115-	ms NK1.1+/CD115-	CD19- CD3-	Sm150Di	pS6	R848	MS5	M	Mouse	median	23.76755238
R35W9_MS5_Ms_M_R848.fcs	ms NK1.1+/CD115-	ms NK1.1+/CD115-	CD19- CD3-	Sm152Di	pErk1/2	R848	MS5	M	Mouse	median	6.972932577
R35W9_MS5_Ms_M_R848.fcs	ms NK1.1+/CD115-	ms NK1.1+/CD115-	CD19- CD3-	Sm154Di	pP38	R848	MS5	M	Mouse	median	3.314788342
R35W9_MS5_Ms_M_R848.fcs	ms NK1.1+/CD115-	ms NK1.1+/CD115-	CD19- CD3-	Gd160Di	pZap70/Syk	R848	MS5	M	Mouse	median	1.526705742
R35W9_MS5_Ms_M_R848.fcs	ms NK1.1+/CD115-	ms NK1.1+/CD115-	CD19- CD3-	Dy161Di	pTBK1	R848	MS5	M	Mouse	median	3.285953522
R35W9_MS5_Ms_M_R848.fcs	ms NK1.1+/CD115-	ms NK1.1+/CD115-	CD19- CD3-	Ho165Di	pSTAT6	R848	MS5	M	Mouse	median	9.690574646
R35W9_MS5_Ms_M_R848.fcs	ms NK1.1+/CD115-	ms NK1.1+/CD115-	CD19- CD3-	Er170Di	pSTAT4	R848	MS5	M	Mouse	median	4.635653019
R35W9_MS5_Ms_M_R848.fcs	ms NK1.1+/CD115-	ms NK1.1+/CD115-	CD19- CD3-	Yb172Di	p4E-BP1	R848	MS5	M	Mouse	median	6.296232224
R35W9_MS5_Ms_M_R848.fcs	ms NK1.1+/CD115-	ms NK1.1+/CD115-	CD19- CD3-	Tm169Di	Ki67	R848	MS5	M	Mouse	median	11.13303185
R35W9_MS5_Ms_M_R848.fcs	ms NK1.1+/CD115-	ms NK1.1+/CD115-	CD19- CD3-	Dy163Di	IkBa	R848	MS5	M	Mouse	median	18.80045223
R35W9_MS5_Ms_M_R848.fcs	Mouse pDCs	Mouse pDCs	FcεRIα-	La139Di	pSTAT3	R848	MS5	M	Mouse	median	45.64932251
R35W9_MS5_Ms_M_R848.fcs	Mouse pDCs	Mouse pDCs	FcεRIα-	Nd144Di	pMAPKAPK2	R848	MS5	M	Mouse	median	10.823102
R35W9_MS5_Ms_M_R848.fcs	Mouse pDCs	Mouse pDCs	FcεRIα-	Nd145Di	pCREB	R848	MS5	M	Mouse	median	48.48869324
R35W9_MS5_Ms_M_R848.fcs	Mouse pDCs	Mouse pDCs	FcεRIα-	Nd146Di	pPLCg2	R848	MS5	M	Mouse	median	16.71240616
R35W9_MS5_Ms_M_R848.fcs	Mouse pDCs	Mouse pDCs	FcεRIα-	Sm147Di	pSTAT1	R848	MS5	M	Mouse	median	3.635140181
R35W9_MS5_Ms_M_R848.fcs	Mouse pDCs	Mouse pDCs	FcεRIα-	Sm149Di	pSTAT5	R848	MS5	M	Mouse	median	9.655950546
R35W9_MS5_Ms_M_R848.fcs	Mouse pDCs	Mouse pDCs	FcεRIα-	Sm150Di	pS6	R848	MS5	M	Mouse	median	56.41282272
R35W9_MS5_Ms_M_R848.fcs	Mouse pDCs	Mouse pDCs	FcεRIα-	Sm152Di	pErk1/2	R848	MS5	M	Mouse	median	14.12025261
R35W9_MS5_Ms_M_R848.fcs	Mouse pDCs	Mouse pDCs	FcεRIα-	Sm154Di	pP38	R848	MS5	M	Mouse	median	7.364564896
R35W9_MS5_Ms_M_R848.fcs	Mouse pDCs	Mouse pDCs	FcεRIα-	Gd160Di	pZap70/Syk	R848	MS5	M	Mouse	median	2.992269993
R35W9_MS5_Ms_M_R848.fcs	Mouse pDCs	Mouse pDCs	FcεRIα-	Dy161Di	pTBK1	R848	MS5	M	Mouse	median	3.464164734
R35W9_MS5_Ms_M_R848.fcs	Mouse pDCs	Mouse pDCs	FcεRIα-	Ho165Di	pSTAT6	R848	MS5	M	Mouse	median	20.93848801
R35W9_MS5_Ms_M_R848.fcs	Mouse pDCs	Mouse pDCs	FcεRIα-	Er170Di	pSTAT4	R848	MS5	M	Mouse	median	5.451881409
R35W9_MS5_Ms_M_R848.fcs	Mouse pDCs	Mouse pDCs	FcεRIα-	Yb172Di	p4E-BP1	R848	MS5	M	Mouse	median	7.638524532
R35W9_MS5_Ms_M_R848.fcs	Mouse pDCs	Mouse pDCs	FcεRIα-	Tm169Di	Ki67	R848	MS5	M	Mouse	median	14.1868124
R35W9_MS5_Ms_M_R848.fcs	Mouse pDCs	Mouse pDCs	FcεRIα-	Dy163Di	IkBa	R848	MS5	M	Mouse	median	3.777470827
R35W9_MS5_Ms_M_R848.fcs	Mouse Ly6C+	Mouse Ly6C+	ms CD115+/NK1.1-	La139Di	pSTAT3	R848	MS5	M	Mouse	median	27.44769096
R35W9_MS5_Ms_M_R848.fcs	Mouse Ly6C+	Mouse Ly6C+	ms CD115+/NK1.1-	Nd144Di	pMAPKAPK2	R848	MS5	M	Mouse	median	9.04747963
R35W9_MS5_Ms_M_R848.fcs	Mouse Ly6C+	Mouse Ly6C+	ms CD115+/NK1.1-	Nd145Di	pCREB	R848	MS5	M	Mouse	median	30.54932976
R35W9_MS5_Ms_M_R848.fcs	Mouse Ly6C+	Mouse Ly6C+	ms CD115+/NK1.1-	Nd146Di	pPLCg2	R848	MS5	M	Mouse	median	10.07728004
R35W9_MS5_Ms_M_R848.fcs	Mouse Ly6C+	Mouse Ly6C+	ms CD115+/NK1.1-	Sm147Di	pSTAT1	R848	MS5	M	Mouse	median	3.556946397
R35W9_MS5_Ms_M_R848.fcs	Mouse Ly6C+	Mouse Ly6C+	ms CD115+/NK1.1-	Sm149Di	pSTAT5	R848	MS5	M	Mouse	median	14.74094343
R35W9_MS5_Ms_M_R848.fcs	Mouse Ly6C+	Mouse Ly6C+	ms CD115+/NK1.1-	Sm150Di	pS6	R848	MS5	M	Mouse	median	78.19797134
R35W9_MS5_Ms_M_R848.fcs	Mouse Ly6C+	Mouse Ly6C+	ms CD115+/NK1.1-	Sm152Di	pErk1/2	R848	MS5	M	Mouse	median	12.43480921
R35W9_MS5_Ms_M_R848.fcs	Mouse Ly6C+	Mouse Ly6C+	ms CD115+/NK1.1-	Sm154Di	pP38	R848	MS5	M	Mouse	median	5.472509623
R35W9_MS5_Ms_M_R848.fcs	Mouse Ly6C+	Mouse Ly6C+	ms CD115+/NK1.1-	Gd160Di	pZap70/Syk	R848	MS5	M	Mouse	median	1.963861942
R35W9_MS5_Ms_M_R848.fcs	Mouse Ly6C+	Mouse Ly6C+	ms CD115+/NK1.1-	Dy161Di	pTBK1	R848	MS5	M	Mouse	median	5.841461658
R35W9_MS5_Ms_M_R848.fcs	Mouse Ly6C+	Mouse Ly6C+	ms CD115+/NK1.1-	Ho165Di	pSTAT6	R848	MS5	M	Mouse	median	12.54852962
R35W9_MS5_Ms_M_R848.fcs	Mouse Ly6C+	Mouse Ly6C+	ms CD115+/NK1.1-	Er170Di	pSTAT4	R848	MS5	M	Mouse	median	4.720763206
R35W9_MS5_Ms_M_R848.fcs	Mouse Ly6C+	Mouse Ly6C+	ms CD115+/NK1.1-	Yb172Di	p4E-BP1	R848	MS5	M	Mouse	median	20.3781538
R35W9_MS5_Ms_M_R848.fcs	Mouse Ly6C+	Mouse Ly6C+	ms CD115+/NK1.1-	Tm169Di	Ki67	R848	MS5	M	Mouse	median	121.5550003
R35W9_MS5_Ms_M_R848.fcs	Mouse Ly6C+	Mouse Ly6C+	ms CD115+/NK1.1-	Dy163Di	IkBa	R848	MS5	M	Mouse	median	26.62273788
R35W9_MS5_Ms_M_R848.fcs	Mouse Ly6C-	Mouse Ly6C-	ms CD115+/NK1.1-	La139Di	pSTAT3	R848	MS5	M	Mouse	median	18.52408123
R35W9_MS5_Ms_M_R848.fcs	Mouse Ly6C-	Mouse Ly6C-	ms CD115+/NK1.1-	Nd144Di	pMAPKAPK2	R848	MS5	M	Mouse	median	9.854401112
R35W9_MS5_Ms_M_R848.fcs	Mouse Ly6C-	Mouse Ly6C-	ms CD115+/NK1.1-	Nd145Di	pCREB	R848	MS5	M	Mouse	median	40.32893372
R35W9_MS5_Ms_M_R848.fcs	Mouse Ly6C-	Mouse Ly6C-	ms CD115+/NK1.1-	Nd146Di	pPLCg2	R848	MS5	M	Mouse	median	17.1692009
R35W9_MS5_Ms_M_R848.fcs	Mouse Ly6C-	Mouse Ly6C-	ms CD115+/NK1.1-	Sm147Di	pSTAT1	R848	MS5	M	Mouse	median	2.61003232
R35W9_MS5_Ms_M_R848.fcs	Mouse Ly6C-	Mouse Ly6C-	ms CD115+/NK1.1-	Sm149Di	pSTAT5	R848	MS5	M	Mouse	median	10.12981319
R35W9_MS5_Ms_M_R848.fcs	Mouse Ly6C-	Mouse Ly6C-	ms CD115+/NK1.1-	Sm150Di	pS6	R848	MS5	M	Mouse	median	54.34588814
R35W9_MS5_Ms_M_R848.fcs	Mouse Ly6C-	Mouse Ly6C-	ms CD115+/NK1.1-	Sm152Di	pErk1/2	R848	MS5	M	Mouse	median	10.09382963
R35W9_MS5_Ms_M_R848.fcs	Mouse Ly6C-	Mouse Ly6C-	ms CD115+/NK1.1-	Sm154Di	pP38	R848	MS5	M	Mouse	median	7.266995907
R35W9_MS5_Ms_M_R848.fcs	Mouse Ly6C-	Mouse Ly6C-	ms CD115+/NK1.1-	Gd160Di	pZap70/Syk	R848	MS5	M	Mouse	median	2.504987717
R35W9_MS5_Ms_M_R848.fcs	Mouse Ly6C-	Mouse Ly6C-	ms CD115+/NK1.1-	Dy161Di	pTBK1	R848	MS5	M	Mouse	median	7.227702141
R35W9_MS5_Ms_M_R848.fcs	Mouse Ly6C-	Mouse Ly6C-	ms CD115+/NK1.1-	Ho165Di	pSTAT6	R848	MS5	M	Mouse	median	10.61636353
R35W9_MS5_Ms_M_R848.fcs	Mouse Ly6C-	Mouse Ly6C-	ms CD115+/NK1.1-	Er170Di	pSTAT4	R848	MS5	M	Mouse	median	5.252894878
R35W9_MS5_Ms_M_R848.fcs	Mouse Ly6C-	Mouse Ly6C-	ms CD115+/NK1.1-	Yb172Di	p4E-BP1	R848	MS5	M	Mouse	median	16.80975342
R35W9_MS5_Ms_M_R848.fcs	Mouse Ly6C-	Mouse Ly6C-	ms CD115+/NK1.1-	Tm169Di	Ki67	R848	MS5	M	Mouse	median	14.38549232
R35W9_MS5_Ms_M_R848.fcs	Mouse Ly6C-	Mouse Ly6C-	ms CD115+/NK1.1-	Dy163Di	IkBa	R848	MS5	M	Mouse	median	16.11953259
R35W9_MS5_Ms_M_R848.fcs	CD8+T cells	CD8+T cells	T Cells	La139Di	pSTAT3	R848	MS5	M	Mouse	median	15.66263151
R35W9_MS5_Ms_M_R848.fcs	CD8+T cells	CD8+T cells	T Cells	Nd144Di	pMAPKAPK2	R848	MS5	M	Mouse	median	5.79036665
R35W9_MS5_Ms_M_R848.fcs	CD8+T cells	CD8+T cells	T Cells	Nd145Di	pCREB	R848	MS5	M	Mouse	median	28.8137331
R35W9_MS5_Ms_M_R848.fcs	CD8+T cells	CD8+T cells	T Cells	Nd146Di	pPLCg2	R848	MS5	M	Mouse	median	7.810926199
R35W9_MS5_Ms_M_R848.fcs	CD8+T cells	CD8+T cells	T Cells	Sm147Di	pSTAT1	R848	MS5	M	Mouse	median	1.976504087
R35W9_MS5_Ms_M_R848.fcs	CD8+T cells	CD8+T cells	T Cells	Sm149Di	pSTAT5	R848	MS5	M	Mouse	median	12.71811676
R35W9_MS5_Ms_M_R848.fcs	CD8+T cells	CD8+T cells	T Cells	Sm150Di	pS6	R848	MS5	M	Mouse	median	37.87768936
R35W9_MS5_Ms_M_R848.fcs	CD8+T cells	CD8+T cells	T Cells	Sm152Di	pErk1/2	R848	MS5	M	Mouse	median	10.17627525
R35W9_MS5_Ms_M_R848.fcs	CD8+T cells	CD8+T cells	T Cells	Sm154Di	pP38	R848	MS5	M	Mouse	median	5.147805691
R35W9_MS5_Ms_M_R848.fcs	CD8+T cells	CD8+T cells	T Cells	Gd160Di	pZap70/Syk	R848	MS5	M	Mouse	median	2.660192966
R35W9_MS5_Ms_M_R848.fcs	CD8+T cells	CD8+T cells	T Cells	Dy161Di	pTBK1	R848	MS5	M	Mouse	median	2.644981623
R35W9_MS5_Ms_M_R848.fcs	CD8+T cells	CD8+T cells	T Cells	Ho165Di	pSTAT6	R848	MS5	M	Mouse	median	10.1238122
R35W9_MS5_Ms_M_R848.fcs	CD8+T cells	CD8+T cells	T Cells	Er170Di	pSTAT4	R848	MS5	M	Mouse	median	3.784367085
R35W9_MS5_Ms_M_R848.fcs	CD8+T cells	CD8+T cells	T Cells	Yb172Di	p4E-BP1	R848	MS5	M	Mouse	median	5.232450008
R35W9_MS5_Ms_M_R848.fcs	CD8+T cells	CD8+T cells	T Cells	Tm169Di	Ki67	R848	MS5	M	Mouse	median	9.175786495
R35W9_MS5_Ms_M_R848.fcs	CD8+T cells	CD8+T cells	T Cells	Dy163Di	IkBa	R848	MS5	M	Mouse	median	18.55446243
R35W9_MS5_Ms_M_R848.fcs	CD4+T cells	CD4+T cells	T Cells	La139Di	pSTAT3	R848	MS5	M	Mouse	median	15.31248856
R35W9_MS5_Ms_M_R848.fcs	CD4+T cells	CD4+T cells	T Cells	Nd144Di	pMAPKAPK2	R848	MS5	M	Mouse	median	6.328542233
R35W9_MS5_Ms_M_R848.fcs	CD4+T cells	CD4+T cells	T Cells	Nd145Di	pCREB	R848	MS5	M	Mouse	median	36.82271957
R35W9_MS5_Ms_M_R848.fcs	CD4+T cells	CD4+T cells	T Cells	Nd146Di	pPLCg2	R848	MS5	M	Mouse	median	6.692572594
R35W9_MS5_Ms_M_R848.fcs	CD4+T cells	CD4+T cells	T Cells	Sm147Di	pSTAT1	R848	MS5	M	Mouse	median	1.896188378
R35W9_MS5_Ms_M_R848.fcs	CD4+T cells	CD4+T cells	T Cells	Sm149Di	pSTAT5	R848	MS5	M	Mouse	median	10.58897114
R35W9_MS5_Ms_M_R848.fcs	CD4+T cells	CD4+T cells	T Cells	Sm150Di	pS6	R848	MS5	M	Mouse	median	35.54094696
R35W9_MS5_Ms_M_R848.fcs	CD4+T cells	CD4+T cells	T Cells	Sm152Di	pErk1/2	R848	MS5	M	Mouse	median	10.27287769
R35W9_MS5_Ms_M_R848.fcs	CD4+T cells	CD4+T cells	T Cells	Sm154Di	pP38	R848	MS5	M	Mouse	median	4.252048016
R35W9_MS5_Ms_M_R848.fcs	CD4+T cells	CD4+T cells	T Cells	Gd160Di	pZap70/Syk	R848	MS5	M	Mouse	median	2.716632128
R35W9_MS5_Ms_M_R848.fcs	CD4+T cells	CD4+T cells	T Cells	Dy161Di	pTBK1	R848	MS5	M	Mouse	median	2.488517046
R35W9_MS5_Ms_M_R848.fcs	CD4+T cells	CD4+T cells	T Cells	Ho165Di	pSTAT6	R848	MS5	M	Mouse	median	10.13072395
R35W9_MS5_Ms_M_R848.fcs	CD4+T cells	CD4+T cells	T Cells	Er170Di	pSTAT4	R848	MS5	M	Mouse	median	3.233712673
R35W9_MS5_Ms_M_R848.fcs	CD4+T cells	CD4+T cells	T Cells	Yb172Di	p4E-BP1	R848	MS5	M	Mouse	median	6.864865303
R35W9_MS5_Ms_M_R848.fcs	CD4+T cells	CD4+T cells	T Cells	Tm169Di	Ki67	R848	MS5	M	Mouse	median	8.474643707
R35W9_MS5_Ms_M_R848.fcs	CD4+T cells	CD4+T cells	T Cells	Dy163Di	IkBa	R848	MS5	M	Mouse	median	18.79135513
R35W9_MS5_Ms_M_R848.fcs	CD4+/CD8+	CD4+/CD8+	T Cells	La139Di	pSTAT3	R848	MS5	M	Mouse	median	26.2680521
R35W9_MS5_Ms_M_R848.fcs	CD4+/CD8+	CD4+/CD8+	T Cells	Nd144Di	pMAPKAPK2	R848	MS5	M	Mouse	median	7.915681601
R35W9_MS5_Ms_M_R848.fcs	CD4+/CD8+	CD4+/CD8+	T Cells	Nd145Di	pCREB	R848	MS5	M	Mouse	median	53.80197906
R35W9_MS5_Ms_M_R848.fcs	CD4+/CD8+	CD4+/CD8+	T Cells	Nd146Di	pPLCg2	R848	MS5	M	Mouse	median	11.4470396
R35W9_MS5_Ms_M_R848.fcs	CD4+/CD8+	CD4+/CD8+	T Cells	Sm147Di	pSTAT1	R848	MS5	M	Mouse	median	3.478157401
R35W9_MS5_Ms_M_R848.fcs	CD4+/CD8+	CD4+/CD8+	T Cells	Sm149Di	pSTAT5	R848	MS5	M	Mouse	median	18.84926796
R35W9_MS5_Ms_M_R848.fcs	CD4+/CD8+	CD4+/CD8+	T Cells	Sm150Di	pS6	R848	MS5	M	Mouse	median	65.23955154
R35W9_MS5_Ms_M_R848.fcs	CD4+/CD8+	CD4+/CD8+	T Cells	Sm152Di	pErk1/2	R848	MS5	M	Mouse	median	16.58590221
R35W9_MS5_Ms_M_R848.fcs	CD4+/CD8+	CD4+/CD8+	T Cells	Sm154Di	pP38	R848	MS5	M	Mouse	median	7.560573578
R35W9_MS5_Ms_M_R848.fcs	CD4+/CD8+	CD4+/CD8+	T Cells	Gd160Di	pZap70/Syk	R848	MS5	M	Mouse	median	4.385684252
R35W9_MS5_Ms_M_R848.fcs	CD4+/CD8+	CD4+/CD8+	T Cells	Dy161Di	pTBK1	R848	MS5	M	Mouse	median	3.76353991
R35W9_MS5_Ms_M_R848.fcs	CD4+/CD8+	CD4+/CD8+	T Cells	Ho165Di	pSTAT6	R848	MS5	M	Mouse	median	15.49198914
R35W9_MS5_Ms_M_R848.fcs	CD4+/CD8+	CD4+/CD8+	T Cells	Er170Di	pSTAT4	R848	MS5	M	Mouse	median	3.972286463
R35W9_MS5_Ms_M_R848.fcs	CD4+/CD8+	CD4+/CD8+	T Cells	Yb172Di	p4E-BP1	R848	MS5	M	Mouse	median	8.604159832
R35W9_MS5_Ms_M_R848.fcs	CD4+/CD8+	CD4+/CD8+	T Cells	Tm169Di	Ki67	R848	MS5	M	Mouse	median	13.02009535
R35W9_MS5_Ms_M_R848.fcs	CD4+/CD8+	CD4+/CD8+	T Cells	Dy163Di	IkBa	R848	MS5	M	Mouse	median	31.87066269
R35W9_MS5_Ms_M_TNFa.fcs	Neutrophils	Neutrophils	Non-Basophils	La139Di	pSTAT3	TNFa	MS5	M	Mouse	median	38.9012146
R35W9_MS5_Ms_M_TNFa.fcs	Neutrophils	Neutrophils	Non-Basophils	Nd144Di	pMAPKAPK2	TNFa	MS5	M	Mouse	median	15.88258743
R35W9_MS5_Ms_M_TNFa.fcs	Neutrophils	Neutrophils	Non-Basophils	Nd145Di	pCREB	TNFa	MS5	M	Mouse	median	42.14357376
R35W9_MS5_Ms_M_TNFa.fcs	Neutrophils	Neutrophils	Non-Basophils	Nd146Di	pPLCg2	TNFa	MS5	M	Mouse	median	10.1734252
R35W9_MS5_Ms_M_TNFa.fcs	Neutrophils	Neutrophils	Non-Basophils	Sm147Di	pSTAT1	TNFa	MS5	M	Mouse	median	5.000478745
R35W9_MS5_Ms_M_TNFa.fcs	Neutrophils	Neutrophils	Non-Basophils	Sm149Di	pSTAT5	TNFa	MS5	M	Mouse	median	8.525794506
R35W9_MS5_Ms_M_TNFa.fcs	Neutrophils	Neutrophils	Non-Basophils	Sm150Di	pS6	TNFa	MS5	M	Mouse	median	78.48252106
R35W9_MS5_Ms_M_TNFa.fcs	Neutrophils	Neutrophils	Non-Basophils	Sm152Di	pErk1/2	TNFa	MS5	M	Mouse	median	26.1384182
R35W9_MS5_Ms_M_TNFa.fcs	Neutrophils	Neutrophils	Non-Basophils	Sm154Di	pP38	TNFa	MS5	M	Mouse	median	7.406965017
R35W9_MS5_Ms_M_TNFa.fcs	Neutrophils	Neutrophils	Non-Basophils	Gd160Di	pZap70/Syk	TNFa	MS5	M	Mouse	median	5.252583265
R35W9_MS5_Ms_M_TNFa.fcs	Neutrophils	Neutrophils	Non-Basophils	Dy161Di	pTBK1	TNFa	MS5	M	Mouse	median	2.772747517
R35W9_MS5_Ms_M_TNFa.fcs	Neutrophils	Neutrophils	Non-Basophils	Ho165Di	pSTAT6	TNFa	MS5	M	Mouse	median	4.945646048
R35W9_MS5_Ms_M_TNFa.fcs	Neutrophils	Neutrophils	Non-Basophils	Er170Di	pSTAT4	TNFa	MS5	M	Mouse	median	3.606123686
R35W9_MS5_Ms_M_TNFa.fcs	Neutrophils	Neutrophils	Non-Basophils	Yb172Di	p4E-BP1	TNFa	MS5	M	Mouse	median	7.731791973
R35W9_MS5_Ms_M_TNFa.fcs	Neutrophils	Neutrophils	Non-Basophils	Tm169Di	Ki67	TNFa	MS5	M	Mouse	median	56.79574013
R35W9_MS5_Ms_M_TNFa.fcs	Neutrophils	Neutrophils	Non-Basophils	Dy163Di	IkBa	TNFa	MS5	M	Mouse	median	3.474372149
R35W9_MS5_Ms_M_TNFa.fcs	B Cells	B Cells	CD45+ CD66-	La139Di	pSTAT3	TNFa	MS5	M	Mouse	median	20.91124153
R35W9_MS5_Ms_M_TNFa.fcs	B Cells	B Cells	CD45+ CD66-	Nd144Di	pMAPKAPK2	TNFa	MS5	M	Mouse	median	5.078423023
R35W9_MS5_Ms_M_TNFa.fcs	B Cells	B Cells	CD45+ CD66-	Nd145Di	pCREB	TNFa	MS5	M	Mouse	median	27.38487816
R35W9_MS5_Ms_M_TNFa.fcs	B Cells	B Cells	CD45+ CD66-	Nd146Di	pPLCg2	TNFa	MS5	M	Mouse	median	7.864710808
R35W9_MS5_Ms_M_TNFa.fcs	B Cells	B Cells	CD45+ CD66-	Sm147Di	pSTAT1	TNFa	MS5	M	Mouse	median	5.888823509
R35W9_MS5_Ms_M_TNFa.fcs	B Cells	B Cells	CD45+ CD66-	Sm149Di	pSTAT5	TNFa	MS5	M	Mouse	median	6.769826412
R35W9_MS5_Ms_M_TNFa.fcs	B Cells	B Cells	CD45+ CD66-	Sm150Di	pS6	TNFa	MS5	M	Mouse	median	29.25942993
R35W9_MS5_Ms_M_TNFa.fcs	B Cells	B Cells	CD45+ CD66-	Sm152Di	pErk1/2	TNFa	MS5	M	Mouse	median	6.444988728
R35W9_MS5_Ms_M_TNFa.fcs	B Cells	B Cells	CD45+ CD66-	Sm154Di	pP38	TNFa	MS5	M	Mouse	median	3.361397505
R35W9_MS5_Ms_M_TNFa.fcs	B Cells	B Cells	CD45+ CD66-	Gd160Di	pZap70/Syk	TNFa	MS5	M	Mouse	median	2.362167358
R35W9_MS5_Ms_M_TNFa.fcs	B Cells	B Cells	CD45+ CD66-	Dy161Di	pTBK1	TNFa	MS5	M	Mouse	median	3.871907473
R35W9_MS5_Ms_M_TNFa.fcs	B Cells	B Cells	CD45+ CD66-	Ho165Di	pSTAT6	TNFa	MS5	M	Mouse	median	8.254858971
R35W9_MS5_Ms_M_TNFa.fcs	B Cells	B Cells	CD45+ CD66-	Er170Di	pSTAT4	TNFa	MS5	M	Mouse	median	3.958012581
R35W9_MS5_Ms_M_TNFa.fcs	B Cells	B Cells	CD45+ CD66-	Yb172Di	p4E-BP1	TNFa	MS5	M	Mouse	median	11.71318054
R35W9_MS5_Ms_M_TNFa.fcs	B Cells	B Cells	CD45+ CD66-	Tm169Di	Ki67	TNFa	MS5	M	Mouse	median	8.891859055
R35W9_MS5_Ms_M_TNFa.fcs	B Cells	B Cells	CD45+ CD66-	Dy163Di	IkBa	TNFa	MS5	M	Mouse	median	24.28608322
R35W9_MS5_Ms_M_TNFa.fcs	Mouse Basophils	Mouse Basophils	ms NK1.1-	La139Di	pSTAT3	TNFa	MS5	M	Mouse	median	18.13947773
R35W9_MS5_Ms_M_TNFa.fcs	Mouse Basophils	Mouse Basophils	ms NK1.1-	Nd144Di	pMAPKAPK2	TNFa	MS5	M	Mouse	median	9.528120995
R35W9_MS5_Ms_M_TNFa.fcs	Mouse Basophils	Mouse Basophils	ms NK1.1-	Nd145Di	pCREB	TNFa	MS5	M	Mouse	median	36.08713531
R35W9_MS5_Ms_M_TNFa.fcs	Mouse Basophils	Mouse Basophils	ms NK1.1-	Nd146Di	pPLCg2	TNFa	MS5	M	Mouse	median	6.305068731
R35W9_MS5_Ms_M_TNFa.fcs	Mouse Basophils	Mouse Basophils	ms NK1.1-	Sm147Di	pSTAT1	TNFa	MS5	M	Mouse	median	2.406962991
R35W9_MS5_Ms_M_TNFa.fcs	Mouse Basophils	Mouse Basophils	ms NK1.1-	Sm149Di	pSTAT5	TNFa	MS5	M	Mouse	median	6.945006847
R35W9_MS5_Ms_M_TNFa.fcs	Mouse Basophils	Mouse Basophils	ms NK1.1-	Sm150Di	pS6	TNFa	MS5	M	Mouse	median	35.60266495
R35W9_MS5_Ms_M_TNFa.fcs	Mouse Basophils	Mouse Basophils	ms NK1.1-	Sm152Di	pErk1/2	TNFa	MS5	M	Mouse	median	12.97609615
R35W9_MS5_Ms_M_TNFa.fcs	Mouse Basophils	Mouse Basophils	ms NK1.1-	Sm154Di	pP38	TNFa	MS5	M	Mouse	median	6.364095211
R35W9_MS5_Ms_M_TNFa.fcs	Mouse Basophils	Mouse Basophils	ms NK1.1-	Gd160Di	pZap70/Syk	TNFa	MS5	M	Mouse	median	2.005702019
R35W9_MS5_Ms_M_TNFa.fcs	Mouse Basophils	Mouse Basophils	ms NK1.1-	Dy161Di	pTBK1	TNFa	MS5	M	Mouse	median	12.35122967
R35W9_MS5_Ms_M_TNFa.fcs	Mouse Basophils	Mouse Basophils	ms NK1.1-	Ho165Di	pSTAT6	TNFa	MS5	M	Mouse	median	15.47529173
R35W9_MS5_Ms_M_TNFa.fcs	Mouse Basophils	Mouse Basophils	ms NK1.1-	Er170Di	pSTAT4	TNFa	MS5	M	Mouse	median	4.115391254
R35W9_MS5_Ms_M_TNFa.fcs	Mouse Basophils	Mouse Basophils	ms NK1.1-	Yb172Di	p4E-BP1	TNFa	MS5	M	Mouse	median	8.045287132
R35W9_MS5_Ms_M_TNFa.fcs	Mouse Basophils	Mouse Basophils	ms NK1.1-	Tm169Di	Ki67	TNFa	MS5	M	Mouse	median	130.147438
R35W9_MS5_Ms_M_TNFa.fcs	Mouse Basophils	Mouse Basophils	ms NK1.1-	Dy163Di	IkBa	TNFa	MS5	M	Mouse	median	39.26138687
R35W9_MS5_Ms_M_TNFa.fcs	ms NK1.1+/CD115-	ms NK1.1+/CD115-	CD19- CD3-	La139Di	pSTAT3	TNFa	MS5	M	Mouse	median	11.90911865
R35W9_MS5_Ms_M_TNFa.fcs	ms NK1.1+/CD115-	ms NK1.1+/CD115-	CD19- CD3-	Nd144Di	pMAPKAPK2	TNFa	MS5	M	Mouse	median	5.787109613
R35W9_MS5_Ms_M_TNFa.fcs	ms NK1.1+/CD115-	ms NK1.1+/CD115-	CD19- CD3-	Nd145Di	pCREB	TNFa	MS5	M	Mouse	median	33.70446014
R35W9_MS5_Ms_M_TNFa.fcs	ms NK1.1+/CD115-	ms NK1.1+/CD115-	CD19- CD3-	Nd146Di	pPLCg2	TNFa	MS5	M	Mouse	median	8.085843086
R35W9_MS5_Ms_M_TNFa.fcs	ms NK1.1+/CD115-	ms NK1.1+/CD115-	CD19- CD3-	Sm147Di	pSTAT1	TNFa	MS5	M	Mouse	median	2.019595385
R35W9_MS5_Ms_M_TNFa.fcs	ms NK1.1+/CD115-	ms NK1.1+/CD115-	CD19- CD3-	Sm149Di	pSTAT5	TNFa	MS5	M	Mouse	median	7.997071743
R35W9_MS5_Ms_M_TNFa.fcs	ms NK1.1+/CD115-	ms NK1.1+/CD115-	CD19- CD3-	Sm150Di	pS6	TNFa	MS5	M	Mouse	median	24.08142281
R35W9_MS5_Ms_M_TNFa.fcs	ms NK1.1+/CD115-	ms NK1.1+/CD115-	CD19- CD3-	Sm152Di	pErk1/2	TNFa	MS5	M	Mouse	median	7.176234722
R35W9_MS5_Ms_M_TNFa.fcs	ms NK1.1+/CD115-	ms NK1.1+/CD115-	CD19- CD3-	Sm154Di	pP38	TNFa	MS5	M	Mouse	median	4.396275043
R35W9_MS5_Ms_M_TNFa.fcs	ms NK1.1+/CD115-	ms NK1.1+/CD115-	CD19- CD3-	Gd160Di	pZap70/Syk	TNFa	MS5	M	Mouse	median	1.703198731
R35W9_MS5_Ms_M_TNFa.fcs	ms NK1.1+/CD115-	ms NK1.1+/CD115-	CD19- CD3-	Dy161Di	pTBK1	TNFa	MS5	M	Mouse	median	3.788350105
R35W9_MS5_Ms_M_TNFa.fcs	ms NK1.1+/CD115-	ms NK1.1+/CD115-	CD19- CD3-	Ho165Di	pSTAT6	TNFa	MS5	M	Mouse	median	8.824565411
R35W9_MS5_Ms_M_TNFa.fcs	ms NK1.1+/CD115-	ms NK1.1+/CD115-	CD19- CD3-	Er170Di	pSTAT4	TNFa	MS5	M	Mouse	median	5.246618509
R35W9_MS5_Ms_M_TNFa.fcs	ms NK1.1+/CD115-	ms NK1.1+/CD115-	CD19- CD3-	Yb172Di	p4E-BP1	TNFa	MS5	M	Mouse	median	6.738066435
R35W9_MS5_Ms_M_TNFa.fcs	ms NK1.1+/CD115-	ms NK1.1+/CD115-	CD19- CD3-	Tm169Di	Ki67	TNFa	MS5	M	Mouse	median	12.46985722
R35W9_MS5_Ms_M_TNFa.fcs	ms NK1.1+/CD115-	ms NK1.1+/CD115-	CD19- CD3-	Dy163Di	IkBa	TNFa	MS5	M	Mouse	median	3.860322118
R35W9_MS5_Ms_M_TNFa.fcs	Mouse pDCs	Mouse pDCs	FcεRIα-	La139Di	pSTAT3	TNFa	MS5	M	Mouse	median	39.29022598
R35W9_MS5_Ms_M_TNFa.fcs	Mouse pDCs	Mouse pDCs	FcεRIα-	Nd144Di	pMAPKAPK2	TNFa	MS5	M	Mouse	median	10.19637012
R35W9_MS5_Ms_M_TNFa.fcs	Mouse pDCs	Mouse pDCs	FcεRIα-	Nd145Di	pCREB	TNFa	MS5	M	Mouse	median	48.95016098
R35W9_MS5_Ms_M_TNFa.fcs	Mouse pDCs	Mouse pDCs	FcεRIα-	Nd146Di	pPLCg2	TNFa	MS5	M	Mouse	median	21.22632027
R35W9_MS5_Ms_M_TNFa.fcs	Mouse pDCs	Mouse pDCs	FcεRIα-	Sm147Di	pSTAT1	TNFa	MS5	M	Mouse	median	4.939546585
R35W9_MS5_Ms_M_TNFa.fcs	Mouse pDCs	Mouse pDCs	FcεRIα-	Sm149Di	pSTAT5	TNFa	MS5	M	Mouse	median	9.942584991
R35W9_MS5_Ms_M_TNFa.fcs	Mouse pDCs	Mouse pDCs	FcεRIα-	Sm150Di	pS6	TNFa	MS5	M	Mouse	median	63.91101646
R35W9_MS5_Ms_M_TNFa.fcs	Mouse pDCs	Mouse pDCs	FcεRIα-	Sm152Di	pErk1/2	TNFa	MS5	M	Mouse	median	13.05177307
R35W9_MS5_Ms_M_TNFa.fcs	Mouse pDCs	Mouse pDCs	FcεRIα-	Sm154Di	pP38	TNFa	MS5	M	Mouse	median	6.247929573
R35W9_MS5_Ms_M_TNFa.fcs	Mouse pDCs	Mouse pDCs	FcεRIα-	Gd160Di	pZap70/Syk	TNFa	MS5	M	Mouse	median	2.804443955
R35W9_MS5_Ms_M_TNFa.fcs	Mouse pDCs	Mouse pDCs	FcεRIα-	Dy161Di	pTBK1	TNFa	MS5	M	Mouse	median	3.102156878
R35W9_MS5_Ms_M_TNFa.fcs	Mouse pDCs	Mouse pDCs	FcεRIα-	Ho165Di	pSTAT6	TNFa	MS5	M	Mouse	median	15.34946394
R35W9_MS5_Ms_M_TNFa.fcs	Mouse pDCs	Mouse pDCs	FcεRIα-	Er170Di	pSTAT4	TNFa	MS5	M	Mouse	median	5.475768089
R35W9_MS5_Ms_M_TNFa.fcs	Mouse pDCs	Mouse pDCs	FcεRIα-	Yb172Di	p4E-BP1	TNFa	MS5	M	Mouse	median	8.858252048
R35W9_MS5_Ms_M_TNFa.fcs	Mouse pDCs	Mouse pDCs	FcεRIα-	Tm169Di	Ki67	TNFa	MS5	M	Mouse	median	14.60394573
R35W9_MS5_Ms_M_TNFa.fcs	Mouse pDCs	Mouse pDCs	FcεRIα-	Dy163Di	IkBa	TNFa	MS5	M	Mouse	median	3.124294281
R35W9_MS5_Ms_M_TNFa.fcs	Mouse Ly6C+	Mouse Ly6C+	ms CD115+/NK1.1-	La139Di	pSTAT3	TNFa	MS5	M	Mouse	median	31.23219109
R35W9_MS5_Ms_M_TNFa.fcs	Mouse Ly6C+	Mouse Ly6C+	ms CD115+/NK1.1-	Nd144Di	pMAPKAPK2	TNFa	MS5	M	Mouse	median	16.98950958
R35W9_MS5_Ms_M_TNFa.fcs	Mouse Ly6C+	Mouse Ly6C+	ms CD115+/NK1.1-	Nd145Di	pCREB	TNFa	MS5	M	Mouse	median	65.9633255
R35W9_MS5_Ms_M_TNFa.fcs	Mouse Ly6C+	Mouse Ly6C+	ms CD115+/NK1.1-	Nd146Di	pPLCg2	TNFa	MS5	M	Mouse	median	13.44673061
R35W9_MS5_Ms_M_TNFa.fcs	Mouse Ly6C+	Mouse Ly6C+	ms CD115+/NK1.1-	Sm147Di	pSTAT1	TNFa	MS5	M	Mouse	median	3.673252702
R35W9_MS5_Ms_M_TNFa.fcs	Mouse Ly6C+	Mouse Ly6C+	ms CD115+/NK1.1-	Sm149Di	pSTAT5	TNFa	MS5	M	Mouse	median	14.43147755
R35W9_MS5_Ms_M_TNFa.fcs	Mouse Ly6C+	Mouse Ly6C+	ms CD115+/NK1.1-	Sm150Di	pS6	TNFa	MS5	M	Mouse	median	148.7934265
R35W9_MS5_Ms_M_TNFa.fcs	Mouse Ly6C+	Mouse Ly6C+	ms CD115+/NK1.1-	Sm152Di	pErk1/2	TNFa	MS5	M	Mouse	median	17.01185417
R35W9_MS5_Ms_M_TNFa.fcs	Mouse Ly6C+	Mouse Ly6C+	ms CD115+/NK1.1-	Sm154Di	pP38	TNFa	MS5	M	Mouse	median	10.87104559
R35W9_MS5_Ms_M_TNFa.fcs	Mouse Ly6C+	Mouse Ly6C+	ms CD115+/NK1.1-	Gd160Di	pZap70/Syk	TNFa	MS5	M	Mouse	median	2.311356306
R35W9_MS5_Ms_M_TNFa.fcs	Mouse Ly6C+	Mouse Ly6C+	ms CD115+/NK1.1-	Dy161Di	pTBK1	TNFa	MS5	M	Mouse	median	6.857714653
R35W9_MS5_Ms_M_TNFa.fcs	Mouse Ly6C+	Mouse Ly6C+	ms CD115+/NK1.1-	Ho165Di	pSTAT6	TNFa	MS5	M	Mouse	median	11.99518585
R35W9_MS5_Ms_M_TNFa.fcs	Mouse Ly6C+	Mouse Ly6C+	ms CD115+/NK1.1-	Er170Di	pSTAT4	TNFa	MS5	M	Mouse	median	5.216009617
R35W9_MS5_Ms_M_TNFa.fcs	Mouse Ly6C+	Mouse Ly6C+	ms CD115+/NK1.1-	Yb172Di	p4E-BP1	TNFa	MS5	M	Mouse	median	20.2633152
R35W9_MS5_Ms_M_TNFa.fcs	Mouse Ly6C+	Mouse Ly6C+	ms CD115+/NK1.1-	Tm169Di	Ki67	TNFa	MS5	M	Mouse	median	116.5216789
R35W9_MS5_Ms_M_TNFa.fcs	Mouse Ly6C+	Mouse Ly6C+	ms CD115+/NK1.1-	Dy163Di	IkBa	TNFa	MS5	M	Mouse	median	8.739405155
R35W9_MS5_Ms_M_TNFa.fcs	Mouse Ly6C-	Mouse Ly6C-	ms CD115+/NK1.1-	La139Di	pSTAT3	TNFa	MS5	M	Mouse	median	22.01481819
R35W9_MS5_Ms_M_TNFa.fcs	Mouse Ly6C-	Mouse Ly6C-	ms CD115+/NK1.1-	Nd144Di	pMAPKAPK2	TNFa	MS5	M	Mouse	median	23.60118103
R35W9_MS5_Ms_M_TNFa.fcs	Mouse Ly6C-	Mouse Ly6C-	ms CD115+/NK1.1-	Nd145Di	pCREB	TNFa	MS5	M	Mouse	median	67.41953278
R35W9_MS5_Ms_M_TNFa.fcs	Mouse Ly6C-	Mouse Ly6C-	ms CD115+/NK1.1-	Nd146Di	pPLCg2	TNFa	MS5	M	Mouse	median	21.20436859
R35W9_MS5_Ms_M_TNFa.fcs	Mouse Ly6C-	Mouse Ly6C-	ms CD115+/NK1.1-	Sm147Di	pSTAT1	TNFa	MS5	M	Mouse	median	2.632234573
R35W9_MS5_Ms_M_TNFa.fcs	Mouse Ly6C-	Mouse Ly6C-	ms CD115+/NK1.1-	Sm149Di	pSTAT5	TNFa	MS5	M	Mouse	median	9.975627899
R35W9_MS5_Ms_M_TNFa.fcs	Mouse Ly6C-	Mouse Ly6C-	ms CD115+/NK1.1-	Sm150Di	pS6	TNFa	MS5	M	Mouse	median	92.50024414
R35W9_MS5_Ms_M_TNFa.fcs	Mouse Ly6C-	Mouse Ly6C-	ms CD115+/NK1.1-	Sm152Di	pErk1/2	TNFa	MS5	M	Mouse	median	16.79643631
R35W9_MS5_Ms_M_TNFa.fcs	Mouse Ly6C-	Mouse Ly6C-	ms CD115+/NK1.1-	Sm154Di	pP38	TNFa	MS5	M	Mouse	median	13.41636562
R35W9_MS5_Ms_M_TNFa.fcs	Mouse Ly6C-	Mouse Ly6C-	ms CD115+/NK1.1-	Gd160Di	pZap70/Syk	TNFa	MS5	M	Mouse	median	3.173559189
R35W9_MS5_Ms_M_TNFa.fcs	Mouse Ly6C-	Mouse Ly6C-	ms CD115+/NK1.1-	Dy161Di	pTBK1	TNFa	MS5	M	Mouse	median	7.945950508
R35W9_MS5_Ms_M_TNFa.fcs	Mouse Ly6C-	Mouse Ly6C-	ms CD115+/NK1.1-	Ho165Di	pSTAT6	TNFa	MS5	M	Mouse	median	9.455693245
R35W9_MS5_Ms_M_TNFa.fcs	Mouse Ly6C-	Mouse Ly6C-	ms CD115+/NK1.1-	Er170Di	pSTAT4	TNFa	MS5	M	Mouse	median	5.8278265
R35W9_MS5_Ms_M_TNFa.fcs	Mouse Ly6C-	Mouse Ly6C-	ms CD115+/NK1.1-	Yb172Di	p4E-BP1	TNFa	MS5	M	Mouse	median	17.82415962
R35W9_MS5_Ms_M_TNFa.fcs	Mouse Ly6C-	Mouse Ly6C-	ms CD115+/NK1.1-	Tm169Di	Ki67	TNFa	MS5	M	Mouse	median	14.61322594
R35W9_MS5_Ms_M_TNFa.fcs	Mouse Ly6C-	Mouse Ly6C-	ms CD115+/NK1.1-	Dy163Di	IkBa	TNFa	MS5	M	Mouse	median	7.898362637
R35W9_MS5_Ms_M_TNFa.fcs	CD8+T cells	CD8+T cells	T Cells	La139Di	pSTAT3	TNFa	MS5	M	Mouse	median	15.47072124
R35W9_MS5_Ms_M_TNFa.fcs	CD8+T cells	CD8+T cells	T Cells	Nd144Di	pMAPKAPK2	TNFa	MS5	M	Mouse	median	5.89630127
R35W9_MS5_Ms_M_TNFa.fcs	CD8+T cells	CD8+T cells	T Cells	Nd145Di	pCREB	TNFa	MS5	M	Mouse	median	29.79952812
R35W9_MS5_Ms_M_TNFa.fcs	CD8+T cells	CD8+T cells	T Cells	Nd146Di	pPLCg2	TNFa	MS5	M	Mouse	median	8.661301613
R35W9_MS5_Ms_M_TNFa.fcs	CD8+T cells	CD8+T cells	T Cells	Sm147Di	pSTAT1	TNFa	MS5	M	Mouse	median	1.892029047
R35W9_MS5_Ms_M_TNFa.fcs	CD8+T cells	CD8+T cells	T Cells	Sm149Di	pSTAT5	TNFa	MS5	M	Mouse	median	13.89802647
R35W9_MS5_Ms_M_TNFa.fcs	CD8+T cells	CD8+T cells	T Cells	Sm150Di	pS6	TNFa	MS5	M	Mouse	median	39.14542389
R35W9_MS5_Ms_M_TNFa.fcs	CD8+T cells	CD8+T cells	T Cells	Sm152Di	pErk1/2	TNFa	MS5	M	Mouse	median	9.960091591
R35W9_MS5_Ms_M_TNFa.fcs	CD8+T cells	CD8+T cells	T Cells	Sm154Di	pP38	TNFa	MS5	M	Mouse	median	5.446116924
R35W9_MS5_Ms_M_TNFa.fcs	CD8+T cells	CD8+T cells	T Cells	Gd160Di	pZap70/Syk	TNFa	MS5	M	Mouse	median	2.744164467
R35W9_MS5_Ms_M_TNFa.fcs	CD8+T cells	CD8+T cells	T Cells	Dy161Di	pTBK1	TNFa	MS5	M	Mouse	median	2.762897015
R35W9_MS5_Ms_M_TNFa.fcs	CD8+T cells	CD8+T cells	T Cells	Ho165Di	pSTAT6	TNFa	MS5	M	Mouse	median	9.066695213
R35W9_MS5_Ms_M_TNFa.fcs	CD8+T cells	CD8+T cells	T Cells	Er170Di	pSTAT4	TNFa	MS5	M	Mouse	median	4.102314949
R35W9_MS5_Ms_M_TNFa.fcs	CD8+T cells	CD8+T cells	T Cells	Yb172Di	p4E-BP1	TNFa	MS5	M	Mouse	median	5.837964058
R35W9_MS5_Ms_M_TNFa.fcs	CD8+T cells	CD8+T cells	T Cells	Tm169Di	Ki67	TNFa	MS5	M	Mouse	median	9.137655258
R35W9_MS5_Ms_M_TNFa.fcs	CD8+T cells	CD8+T cells	T Cells	Dy163Di	IkBa	TNFa	MS5	M	Mouse	median	5.442224026
R35W9_MS5_Ms_M_TNFa.fcs	CD4+T cells	CD4+T cells	T Cells	La139Di	pSTAT3	TNFa	MS5	M	Mouse	median	15.0543232
R35W9_MS5_Ms_M_TNFa.fcs	CD4+T cells	CD4+T cells	T Cells	Nd144Di	pMAPKAPK2	TNFa	MS5	M	Mouse	median	6.39385128
R35W9_MS5_Ms_M_TNFa.fcs	CD4+T cells	CD4+T cells	T Cells	Nd145Di	pCREB	TNFa	MS5	M	Mouse	median	40.14080811
R35W9_MS5_Ms_M_TNFa.fcs	CD4+T cells	CD4+T cells	T Cells	Nd146Di	pPLCg2	TNFa	MS5	M	Mouse	median	7.300760746
R35W9_MS5_Ms_M_TNFa.fcs	CD4+T cells	CD4+T cells	T Cells	Sm147Di	pSTAT1	TNFa	MS5	M	Mouse	median	1.856453836
R35W9_MS5_Ms_M_TNFa.fcs	CD4+T cells	CD4+T cells	T Cells	Sm149Di	pSTAT5	TNFa	MS5	M	Mouse	median	11.58059311
R35W9_MS5_Ms_M_TNFa.fcs	CD4+T cells	CD4+T cells	T Cells	Sm150Di	pS6	TNFa	MS5	M	Mouse	median	36.32101631
R35W9_MS5_Ms_M_TNFa.fcs	CD4+T cells	CD4+T cells	T Cells	Sm152Di	pErk1/2	TNFa	MS5	M	Mouse	median	9.877063274
R35W9_MS5_Ms_M_TNFa.fcs	CD4+T cells	CD4+T cells	T Cells	Sm154Di	pP38	TNFa	MS5	M	Mouse	median	4.627118587
R35W9_MS5_Ms_M_TNFa.fcs	CD4+T cells	CD4+T cells	T Cells	Gd160Di	pZap70/Syk	TNFa	MS5	M	Mouse	median	2.742686033
R35W9_MS5_Ms_M_TNFa.fcs	CD4+T cells	CD4+T cells	T Cells	Dy161Di	pTBK1	TNFa	MS5	M	Mouse	median	2.572400093
R35W9_MS5_Ms_M_TNFa.fcs	CD4+T cells	CD4+T cells	T Cells	Ho165Di	pSTAT6	TNFa	MS5	M	Mouse	median	8.307858467
R35W9_MS5_Ms_M_TNFa.fcs	CD4+T cells	CD4+T cells	T Cells	Er170Di	pSTAT4	TNFa	MS5	M	Mouse	median	3.496112227
R35W9_MS5_Ms_M_TNFa.fcs	CD4+T cells	CD4+T cells	T Cells	Yb172Di	p4E-BP1	TNFa	MS5	M	Mouse	median	7.361006498
R35W9_MS5_Ms_M_TNFa.fcs	CD4+T cells	CD4+T cells	T Cells	Tm169Di	Ki67	TNFa	MS5	M	Mouse	median	8.392137527
R35W9_MS5_Ms_M_TNFa.fcs	CD4+T cells	CD4+T cells	T Cells	Dy163Di	IkBa	TNFa	MS5	M	Mouse	median	4.252197266
R35W9_MS5_Ms_M_TNFa.fcs	CD4+/CD8+	CD4+/CD8+	T Cells	La139Di	pSTAT3	TNFa	MS5	M	Mouse	median	26.71659279
R35W9_MS5_Ms_M_TNFa.fcs	CD4+/CD8+	CD4+/CD8+	T Cells	Nd144Di	pMAPKAPK2	TNFa	MS5	M	Mouse	median	10.33300209
R35W9_MS5_Ms_M_TNFa.fcs	CD4+/CD8+	CD4+/CD8+	T Cells	Nd145Di	pCREB	TNFa	MS5	M	Mouse	median	70.81328583
R35W9_MS5_Ms_M_TNFa.fcs	CD4+/CD8+	CD4+/CD8+	T Cells	Nd146Di	pPLCg2	TNFa	MS5	M	Mouse	median	14.91375542
R35W9_MS5_Ms_M_TNFa.fcs	CD4+/CD8+	CD4+/CD8+	T Cells	Sm147Di	pSTAT1	TNFa	MS5	M	Mouse	median	3.219058752
R35W9_MS5_Ms_M_TNFa.fcs	CD4+/CD8+	CD4+/CD8+	T Cells	Sm149Di	pSTAT5	TNFa	MS5	M	Mouse	median	17.28456879
R35W9_MS5_Ms_M_TNFa.fcs	CD4+/CD8+	CD4+/CD8+	T Cells	Sm150Di	pS6	TNFa	MS5	M	Mouse	median	65.58908081
R35W9_MS5_Ms_M_TNFa.fcs	CD4+/CD8+	CD4+/CD8+	T Cells	Sm152Di	pErk1/2	TNFa	MS5	M	Mouse	median	15.73688221
R35W9_MS5_Ms_M_TNFa.fcs	CD4+/CD8+	CD4+/CD8+	T Cells	Sm154Di	pP38	TNFa	MS5	M	Mouse	median	6.927741051
R35W9_MS5_Ms_M_TNFa.fcs	CD4+/CD8+	CD4+/CD8+	T Cells	Gd160Di	pZap70/Syk	TNFa	MS5	M	Mouse	median	4.331897259
R35W9_MS5_Ms_M_TNFa.fcs	CD4+/CD8+	CD4+/CD8+	T Cells	Dy161Di	pTBK1	TNFa	MS5	M	Mouse	median	2.986390352
R35W9_MS5_Ms_M_TNFa.fcs	CD4+/CD8+	CD4+/CD8+	T Cells	Ho165Di	pSTAT6	TNFa	MS5	M	Mouse	median	13.3425312
R35W9_MS5_Ms_M_TNFa.fcs	CD4+/CD8+	CD4+/CD8+	T Cells	Er170Di	pSTAT4	TNFa	MS5	M	Mouse	median	4.849645138
R35W9_MS5_Ms_M_TNFa.fcs	CD4+/CD8+	CD4+/CD8+	T Cells	Yb172Di	p4E-BP1	TNFa	MS5	M	Mouse	median	7.572396755
R35W9_MS5_Ms_M_TNFa.fcs	CD4+/CD8+	CD4+/CD8+	T Cells	Tm169Di	Ki67	TNFa	MS5	M	Mouse	median	14.12521744
R35W9_MS5_Ms_M_TNFa.fcs	CD4+/CD8+	CD4+/CD8+	T Cells	Dy163Di	IkBa	TNFa	MS5	M	Mouse	median	9.861870766
R35W9_MS5_Ms_M_IFNg.fcs	Neutrophils	Neutrophils	Non-Basophils	La139Di	pSTAT3	IFNg	MS5	M	Mouse	median	40.92202377
R35W9_MS5_Ms_M_IFNg.fcs	Neutrophils	Neutrophils	Non-Basophils	Nd144Di	pMAPKAPK2	IFNg	MS5	M	Mouse	median	10.70296478
R35W9_MS5_Ms_M_IFNg.fcs	Neutrophils	Neutrophils	Non-Basophils	Nd145Di	pCREB	IFNg	MS5	M	Mouse	median	34.14068985
R35W9_MS5_Ms_M_IFNg.fcs	Neutrophils	Neutrophils	Non-Basophils	Nd146Di	pPLCg2	IFNg	MS5	M	Mouse	median	8.045338631
R35W9_MS5_Ms_M_IFNg.fcs	Neutrophils	Neutrophils	Non-Basophils	Sm147Di	pSTAT1	IFNg	MS5	M	Mouse	median	19.48633003
R35W9_MS5_Ms_M_IFNg.fcs	Neutrophils	Neutrophils	Non-Basophils	Sm149Di	pSTAT5	IFNg	MS5	M	Mouse	median	7.454332352
R35W9_MS5_Ms_M_IFNg.fcs	Neutrophils	Neutrophils	Non-Basophils	Sm150Di	pS6	IFNg	MS5	M	Mouse	median	56.95152283
R35W9_MS5_Ms_M_IFNg.fcs	Neutrophils	Neutrophils	Non-Basophils	Sm152Di	pErk1/2	IFNg	MS5	M	Mouse	median	21.13621521
R35W9_MS5_Ms_M_IFNg.fcs	Neutrophils	Neutrophils	Non-Basophils	Sm154Di	pP38	IFNg	MS5	M	Mouse	median	5.487462997
R35W9_MS5_Ms_M_IFNg.fcs	Neutrophils	Neutrophils	Non-Basophils	Gd160Di	pZap70/Syk	IFNg	MS5	M	Mouse	median	4.380402088
R35W9_MS5_Ms_M_IFNg.fcs	Neutrophils	Neutrophils	Non-Basophils	Dy161Di	pTBK1	IFNg	MS5	M	Mouse	median	2.139764309
R35W9_MS5_Ms_M_IFNg.fcs	Neutrophils	Neutrophils	Non-Basophils	Ho165Di	pSTAT6	IFNg	MS5	M	Mouse	median	4.457685471
R35W9_MS5_Ms_M_IFNg.fcs	Neutrophils	Neutrophils	Non-Basophils	Er170Di	pSTAT4	IFNg	MS5	M	Mouse	median	2.724937439
R35W9_MS5_Ms_M_IFNg.fcs	Neutrophils	Neutrophils	Non-Basophils	Yb172Di	p4E-BP1	IFNg	MS5	M	Mouse	median	5.08344841
R35W9_MS5_Ms_M_IFNg.fcs	Neutrophils	Neutrophils	Non-Basophils	Tm169Di	Ki67	IFNg	MS5	M	Mouse	median	52.40456772
R35W9_MS5_Ms_M_IFNg.fcs	Neutrophils	Neutrophils	Non-Basophils	Dy163Di	IkBa	IFNg	MS5	M	Mouse	median	3.776936531
R35W9_MS5_Ms_M_IFNg.fcs	B Cells	B Cells	CD45+ CD66-	La139Di	pSTAT3	IFNg	MS5	M	Mouse	median	21.35852623
R35W9_MS5_Ms_M_IFNg.fcs	B Cells	B Cells	CD45+ CD66-	Nd144Di	pMAPKAPK2	IFNg	MS5	M	Mouse	median	4.835361958
R35W9_MS5_Ms_M_IFNg.fcs	B Cells	B Cells	CD45+ CD66-	Nd145Di	pCREB	IFNg	MS5	M	Mouse	median	25.59415436
R35W9_MS5_Ms_M_IFNg.fcs	B Cells	B Cells	CD45+ CD66-	Nd146Di	pPLCg2	IFNg	MS5	M	Mouse	median	7.079135895
R35W9_MS5_Ms_M_IFNg.fcs	B Cells	B Cells	CD45+ CD66-	Sm147Di	pSTAT1	IFNg	MS5	M	Mouse	median	10.11301136
R35W9_MS5_Ms_M_IFNg.fcs	B Cells	B Cells	CD45+ CD66-	Sm149Di	pSTAT5	IFNg	MS5	M	Mouse	median	6.236833096
R35W9_MS5_Ms_M_IFNg.fcs	B Cells	B Cells	CD45+ CD66-	Sm150Di	pS6	IFNg	MS5	M	Mouse	median	29.08391571
R35W9_MS5_Ms_M_IFNg.fcs	B Cells	B Cells	CD45+ CD66-	Sm152Di	pErk1/2	IFNg	MS5	M	Mouse	median	6.781144142
R35W9_MS5_Ms_M_IFNg.fcs	B Cells	B Cells	CD45+ CD66-	Sm154Di	pP38	IFNg	MS5	M	Mouse	median	3.226538181
R35W9_MS5_Ms_M_IFNg.fcs	B Cells	B Cells	CD45+ CD66-	Gd160Di	pZap70/Syk	IFNg	MS5	M	Mouse	median	2.258412838
R35W9_MS5_Ms_M_IFNg.fcs	B Cells	B Cells	CD45+ CD66-	Dy161Di	pTBK1	IFNg	MS5	M	Mouse	median	4.150260448
R35W9_MS5_Ms_M_IFNg.fcs	B Cells	B Cells	CD45+ CD66-	Ho165Di	pSTAT6	IFNg	MS5	M	Mouse	median	9.136401176
R35W9_MS5_Ms_M_IFNg.fcs	B Cells	B Cells	CD45+ CD66-	Er170Di	pSTAT4	IFNg	MS5	M	Mouse	median	3.77992487
R35W9_MS5_Ms_M_IFNg.fcs	B Cells	B Cells	CD45+ CD66-	Yb172Di	p4E-BP1	IFNg	MS5	M	Mouse	median	10.75665188
R35W9_MS5_Ms_M_IFNg.fcs	B Cells	B Cells	CD45+ CD66-	Tm169Di	Ki67	IFNg	MS5	M	Mouse	median	8.616725922
R35W9_MS5_Ms_M_IFNg.fcs	B Cells	B Cells	CD45+ CD66-	Dy163Di	IkBa	IFNg	MS5	M	Mouse	median	23.80887604
R35W9_MS5_Ms_M_IFNg.fcs	Mouse Basophils	Mouse Basophils	ms NK1.1-	La139Di	pSTAT3	IFNg	MS5	M	Mouse	median	18.59672165
R35W9_MS5_Ms_M_IFNg.fcs	Mouse Basophils	Mouse Basophils	ms NK1.1-	Nd144Di	pMAPKAPK2	IFNg	MS5	M	Mouse	median	10.42307186
R35W9_MS5_Ms_M_IFNg.fcs	Mouse Basophils	Mouse Basophils	ms NK1.1-	Nd145Di	pCREB	IFNg	MS5	M	Mouse	median	34.14144707
R35W9_MS5_Ms_M_IFNg.fcs	Mouse Basophils	Mouse Basophils	ms NK1.1-	Nd146Di	pPLCg2	IFNg	MS5	M	Mouse	median	6.351297379
R35W9_MS5_Ms_M_IFNg.fcs	Mouse Basophils	Mouse Basophils	ms NK1.1-	Sm147Di	pSTAT1	IFNg	MS5	M	Mouse	median	11.82124043
R35W9_MS5_Ms_M_IFNg.fcs	Mouse Basophils	Mouse Basophils	ms NK1.1-	Sm149Di	pSTAT5	IFNg	MS5	M	Mouse	median	7.656476974
R35W9_MS5_Ms_M_IFNg.fcs	Mouse Basophils	Mouse Basophils	ms NK1.1-	Sm150Di	pS6	IFNg	MS5	M	Mouse	median	33.39522934
R35W9_MS5_Ms_M_IFNg.fcs	Mouse Basophils	Mouse Basophils	ms NK1.1-	Sm152Di	pErk1/2	IFNg	MS5	M	Mouse	median	12.84488773
R35W9_MS5_Ms_M_IFNg.fcs	Mouse Basophils	Mouse Basophils	ms NK1.1-	Sm154Di	pP38	IFNg	MS5	M	Mouse	median	6.143364429
R35W9_MS5_Ms_M_IFNg.fcs	Mouse Basophils	Mouse Basophils	ms NK1.1-	Gd160Di	pZap70/Syk	IFNg	MS5	M	Mouse	median	1.588152826
R35W9_MS5_Ms_M_IFNg.fcs	Mouse Basophils	Mouse Basophils	ms NK1.1-	Dy161Di	pTBK1	IFNg	MS5	M	Mouse	median	12.17625427
R35W9_MS5_Ms_M_IFNg.fcs	Mouse Basophils	Mouse Basophils	ms NK1.1-	Ho165Di	pSTAT6	IFNg	MS5	M	Mouse	median	17.25806713
R35W9_MS5_Ms_M_IFNg.fcs	Mouse Basophils	Mouse Basophils	ms NK1.1-	Er170Di	pSTAT4	IFNg	MS5	M	Mouse	median	3.602743149
R35W9_MS5_Ms_M_IFNg.fcs	Mouse Basophils	Mouse Basophils	ms NK1.1-	Yb172Di	p4E-BP1	IFNg	MS5	M	Mouse	median	6.138397455
R35W9_MS5_Ms_M_IFNg.fcs	Mouse Basophils	Mouse Basophils	ms NK1.1-	Tm169Di	Ki67	IFNg	MS5	M	Mouse	median	123.6452675
R35W9_MS5_Ms_M_IFNg.fcs	Mouse Basophils	Mouse Basophils	ms NK1.1-	Dy163Di	IkBa	IFNg	MS5	M	Mouse	median	37.51732254
R35W9_MS5_Ms_M_IFNg.fcs	ms NK1.1+/CD115-	ms NK1.1+/CD115-	CD19- CD3-	La139Di	pSTAT3	IFNg	MS5	M	Mouse	median	12.41339779
R35W9_MS5_Ms_M_IFNg.fcs	ms NK1.1+/CD115-	ms NK1.1+/CD115-	CD19- CD3-	Nd144Di	pMAPKAPK2	IFNg	MS5	M	Mouse	median	4.528564453
R35W9_MS5_Ms_M_IFNg.fcs	ms NK1.1+/CD115-	ms NK1.1+/CD115-	CD19- CD3-	Nd145Di	pCREB	IFNg	MS5	M	Mouse	median	21.32031822
R35W9_MS5_Ms_M_IFNg.fcs	ms NK1.1+/CD115-	ms NK1.1+/CD115-	CD19- CD3-	Nd146Di	pPLCg2	IFNg	MS5	M	Mouse	median	6.493337154
R35W9_MS5_Ms_M_IFNg.fcs	ms NK1.1+/CD115-	ms NK1.1+/CD115-	CD19- CD3-	Sm147Di	pSTAT1	IFNg	MS5	M	Mouse	median	1.958869815
R35W9_MS5_Ms_M_IFNg.fcs	ms NK1.1+/CD115-	ms NK1.1+/CD115-	CD19- CD3-	Sm149Di	pSTAT5	IFNg	MS5	M	Mouse	median	7.08742857
R35W9_MS5_Ms_M_IFNg.fcs	ms NK1.1+/CD115-	ms NK1.1+/CD115-	CD19- CD3-	Sm150Di	pS6	IFNg	MS5	M	Mouse	median	23.48431396
R35W9_MS5_Ms_M_IFNg.fcs	ms NK1.1+/CD115-	ms NK1.1+/CD115-	CD19- CD3-	Sm152Di	pErk1/2	IFNg	MS5	M	Mouse	median	6.942061901
R35W9_MS5_Ms_M_IFNg.fcs	ms NK1.1+/CD115-	ms NK1.1+/CD115-	CD19- CD3-	Sm154Di	pP38	IFNg	MS5	M	Mouse	median	3.221702337
R35W9_MS5_Ms_M_IFNg.fcs	ms NK1.1+/CD115-	ms NK1.1+/CD115-	CD19- CD3-	Gd160Di	pZap70/Syk	IFNg	MS5	M	Mouse	median	1.544676781
R35W9_MS5_Ms_M_IFNg.fcs	ms NK1.1+/CD115-	ms NK1.1+/CD115-	CD19- CD3-	Dy161Di	pTBK1	IFNg	MS5	M	Mouse	median	3.392287493
R35W9_MS5_Ms_M_IFNg.fcs	ms NK1.1+/CD115-	ms NK1.1+/CD115-	CD19- CD3-	Ho165Di	pSTAT6	IFNg	MS5	M	Mouse	median	9.619745255
R35W9_MS5_Ms_M_IFNg.fcs	ms NK1.1+/CD115-	ms NK1.1+/CD115-	CD19- CD3-	Er170Di	pSTAT4	IFNg	MS5	M	Mouse	median	4.763911247
R35W9_MS5_Ms_M_IFNg.fcs	ms NK1.1+/CD115-	ms NK1.1+/CD115-	CD19- CD3-	Yb172Di	p4E-BP1	IFNg	MS5	M	Mouse	median	5.636804581
R35W9_MS5_Ms_M_IFNg.fcs	ms NK1.1+/CD115-	ms NK1.1+/CD115-	CD19- CD3-	Tm169Di	Ki67	IFNg	MS5	M	Mouse	median	11.25129032
R35W9_MS5_Ms_M_IFNg.fcs	ms NK1.1+/CD115-	ms NK1.1+/CD115-	CD19- CD3-	Dy163Di	IkBa	IFNg	MS5	M	Mouse	median	17.44281197
R35W9_MS5_Ms_M_IFNg.fcs	Mouse pDCs	Mouse pDCs	FcεRIα-	La139Di	pSTAT3	IFNg	MS5	M	Mouse	median	42.49092102
R35W9_MS5_Ms_M_IFNg.fcs	Mouse pDCs	Mouse pDCs	FcεRIα-	Nd144Di	pMAPKAPK2	IFNg	MS5	M	Mouse	median	8.83372879
R35W9_MS5_Ms_M_IFNg.fcs	Mouse pDCs	Mouse pDCs	FcεRIα-	Nd145Di	pCREB	IFNg	MS5	M	Mouse	median	26.55539703
R35W9_MS5_Ms_M_IFNg.fcs	Mouse pDCs	Mouse pDCs	FcεRIα-	Nd146Di	pPLCg2	IFNg	MS5	M	Mouse	median	18.74568367
R35W9_MS5_Ms_M_IFNg.fcs	Mouse pDCs	Mouse pDCs	FcεRIα-	Sm147Di	pSTAT1	IFNg	MS5	M	Mouse	median	4.287469864
R35W9_MS5_Ms_M_IFNg.fcs	Mouse pDCs	Mouse pDCs	FcεRIα-	Sm149Di	pSTAT5	IFNg	MS5	M	Mouse	median	9.581113815
R35W9_MS5_Ms_M_IFNg.fcs	Mouse pDCs	Mouse pDCs	FcεRIα-	Sm150Di	pS6	IFNg	MS5	M	Mouse	median	56.32568359
R35W9_MS5_Ms_M_IFNg.fcs	Mouse pDCs	Mouse pDCs	FcεRIα-	Sm152Di	pErk1/2	IFNg	MS5	M	Mouse	median	14.59941673
R35W9_MS5_Ms_M_IFNg.fcs	Mouse pDCs	Mouse pDCs	FcεRIα-	Sm154Di	pP38	IFNg	MS5	M	Mouse	median	6.013129234
R35W9_MS5_Ms_M_IFNg.fcs	Mouse pDCs	Mouse pDCs	FcεRIα-	Gd160Di	pZap70/Syk	IFNg	MS5	M	Mouse	median	3.876423359
R35W9_MS5_Ms_M_IFNg.fcs	Mouse pDCs	Mouse pDCs	FcεRIα-	Dy161Di	pTBK1	IFNg	MS5	M	Mouse	median	2.81062603
R35W9_MS5_Ms_M_IFNg.fcs	Mouse pDCs	Mouse pDCs	FcεRIα-	Ho165Di	pSTAT6	IFNg	MS5	M	Mouse	median	27.47360229
R35W9_MS5_Ms_M_IFNg.fcs	Mouse pDCs	Mouse pDCs	FcεRIα-	Er170Di	pSTAT4	IFNg	MS5	M	Mouse	median	4.219381809
R35W9_MS5_Ms_M_IFNg.fcs	Mouse pDCs	Mouse pDCs	FcεRIα-	Yb172Di	p4E-BP1	IFNg	MS5	M	Mouse	median	6.281877995
R35W9_MS5_Ms_M_IFNg.fcs	Mouse pDCs	Mouse pDCs	FcεRIα-	Tm169Di	Ki67	IFNg	MS5	M	Mouse	median	16.65735817
R35W9_MS5_Ms_M_IFNg.fcs	Mouse pDCs	Mouse pDCs	FcεRIα-	Dy163Di	IkBa	IFNg	MS5	M	Mouse	median	11.26302338
R35W9_MS5_Ms_M_IFNg.fcs	Mouse Ly6C+	Mouse Ly6C+	ms CD115+/NK1.1-	La139Di	pSTAT3	IFNg	MS5	M	Mouse	median	27.5359745
R35W9_MS5_Ms_M_IFNg.fcs	Mouse Ly6C+	Mouse Ly6C+	ms CD115+/NK1.1-	Nd144Di	pMAPKAPK2	IFNg	MS5	M	Mouse	median	7.900969982
R35W9_MS5_Ms_M_IFNg.fcs	Mouse Ly6C+	Mouse Ly6C+	ms CD115+/NK1.1-	Nd145Di	pCREB	IFNg	MS5	M	Mouse	median	26.69935417
R35W9_MS5_Ms_M_IFNg.fcs	Mouse Ly6C+	Mouse Ly6C+	ms CD115+/NK1.1-	Nd146Di	pPLCg2	IFNg	MS5	M	Mouse	median	9.807103157
R35W9_MS5_Ms_M_IFNg.fcs	Mouse Ly6C+	Mouse Ly6C+	ms CD115+/NK1.1-	Sm147Di	pSTAT1	IFNg	MS5	M	Mouse	median	21.76694489
R35W9_MS5_Ms_M_IFNg.fcs	Mouse Ly6C+	Mouse Ly6C+	ms CD115+/NK1.1-	Sm149Di	pSTAT5	IFNg	MS5	M	Mouse	median	15.04420948
R35W9_MS5_Ms_M_IFNg.fcs	Mouse Ly6C+	Mouse Ly6C+	ms CD115+/NK1.1-	Sm150Di	pS6	IFNg	MS5	M	Mouse	median	72.11274719
R35W9_MS5_Ms_M_IFNg.fcs	Mouse Ly6C+	Mouse Ly6C+	ms CD115+/NK1.1-	Sm152Di	pErk1/2	IFNg	MS5	M	Mouse	median	11.90664482
R35W9_MS5_Ms_M_IFNg.fcs	Mouse Ly6C+	Mouse Ly6C+	ms CD115+/NK1.1-	Sm154Di	pP38	IFNg	MS5	M	Mouse	median	4.448062897
R35W9_MS5_Ms_M_IFNg.fcs	Mouse Ly6C+	Mouse Ly6C+	ms CD115+/NK1.1-	Gd160Di	pZap70/Syk	IFNg	MS5	M	Mouse	median	1.830224276
R35W9_MS5_Ms_M_IFNg.fcs	Mouse Ly6C+	Mouse Ly6C+	ms CD115+/NK1.1-	Dy161Di	pTBK1	IFNg	MS5	M	Mouse	median	5.249969006
R35W9_MS5_Ms_M_IFNg.fcs	Mouse Ly6C+	Mouse Ly6C+	ms CD115+/NK1.1-	Ho165Di	pSTAT6	IFNg	MS5	M	Mouse	median	12.70716095
R35W9_MS5_Ms_M_IFNg.fcs	Mouse Ly6C+	Mouse Ly6C+	ms CD115+/NK1.1-	Er170Di	pSTAT4	IFNg	MS5	M	Mouse	median	4.380507946
R35W9_MS5_Ms_M_IFNg.fcs	Mouse Ly6C+	Mouse Ly6C+	ms CD115+/NK1.1-	Yb172Di	p4E-BP1	IFNg	MS5	M	Mouse	median	16.71540833
R35W9_MS5_Ms_M_IFNg.fcs	Mouse Ly6C+	Mouse Ly6C+	ms CD115+/NK1.1-	Tm169Di	Ki67	IFNg	MS5	M	Mouse	median	124.3479996
R35W9_MS5_Ms_M_IFNg.fcs	Mouse Ly6C+	Mouse Ly6C+	ms CD115+/NK1.1-	Dy163Di	IkBa	IFNg	MS5	M	Mouse	median	33.02101135
R35W9_MS5_Ms_M_IFNg.fcs	Mouse Ly6C-	Mouse Ly6C-	ms CD115+/NK1.1-	La139Di	pSTAT3	IFNg	MS5	M	Mouse	median	17.87142944
R35W9_MS5_Ms_M_IFNg.fcs	Mouse Ly6C-	Mouse Ly6C-	ms CD115+/NK1.1-	Nd144Di	pMAPKAPK2	IFNg	MS5	M	Mouse	median	7.346258163
R35W9_MS5_Ms_M_IFNg.fcs	Mouse Ly6C-	Mouse Ly6C-	ms CD115+/NK1.1-	Nd145Di	pCREB	IFNg	MS5	M	Mouse	median	29.76226997
R35W9_MS5_Ms_M_IFNg.fcs	Mouse Ly6C-	Mouse Ly6C-	ms CD115+/NK1.1-	Nd146Di	pPLCg2	IFNg	MS5	M	Mouse	median	15.46739006
R35W9_MS5_Ms_M_IFNg.fcs	Mouse Ly6C-	Mouse Ly6C-	ms CD115+/NK1.1-	Sm147Di	pSTAT1	IFNg	MS5	M	Mouse	median	6.965542316
R35W9_MS5_Ms_M_IFNg.fcs	Mouse Ly6C-	Mouse Ly6C-	ms CD115+/NK1.1-	Sm149Di	pSTAT5	IFNg	MS5	M	Mouse	median	11.11559582
R35W9_MS5_Ms_M_IFNg.fcs	Mouse Ly6C-	Mouse Ly6C-	ms CD115+/NK1.1-	Sm150Di	pS6	IFNg	MS5	M	Mouse	median	50.61985779
R35W9_MS5_Ms_M_IFNg.fcs	Mouse Ly6C-	Mouse Ly6C-	ms CD115+/NK1.1-	Sm152Di	pErk1/2	IFNg	MS5	M	Mouse	median	9.157944679
R35W9_MS5_Ms_M_IFNg.fcs	Mouse Ly6C-	Mouse Ly6C-	ms CD115+/NK1.1-	Sm154Di	pP38	IFNg	MS5	M	Mouse	median	4.49155283
R35W9_MS5_Ms_M_IFNg.fcs	Mouse Ly6C-	Mouse Ly6C-	ms CD115+/NK1.1-	Gd160Di	pZap70/Syk	IFNg	MS5	M	Mouse	median	2.45767951
R35W9_MS5_Ms_M_IFNg.fcs	Mouse Ly6C-	Mouse Ly6C-	ms CD115+/NK1.1-	Dy161Di	pTBK1	IFNg	MS5	M	Mouse	median	6.768612862
R35W9_MS5_Ms_M_IFNg.fcs	Mouse Ly6C-	Mouse Ly6C-	ms CD115+/NK1.1-	Ho165Di	pSTAT6	IFNg	MS5	M	Mouse	median	11.62563801
R35W9_MS5_Ms_M_IFNg.fcs	Mouse Ly6C-	Mouse Ly6C-	ms CD115+/NK1.1-	Er170Di	pSTAT4	IFNg	MS5	M	Mouse	median	5.40469408
R35W9_MS5_Ms_M_IFNg.fcs	Mouse Ly6C-	Mouse Ly6C-	ms CD115+/NK1.1-	Yb172Di	p4E-BP1	IFNg	MS5	M	Mouse	median	14.72527122
R35W9_MS5_Ms_M_IFNg.fcs	Mouse Ly6C-	Mouse Ly6C-	ms CD115+/NK1.1-	Tm169Di	Ki67	IFNg	MS5	M	Mouse	median	14.65662575
R35W9_MS5_Ms_M_IFNg.fcs	Mouse Ly6C-	Mouse Ly6C-	ms CD115+/NK1.1-	Dy163Di	IkBa	IFNg	MS5	M	Mouse	median	34.9884758
R35W9_MS5_Ms_M_IFNg.fcs	CD8+T cells	CD8+T cells	T Cells	La139Di	pSTAT3	IFNg	MS5	M	Mouse	median	15.84771252
R35W9_MS5_Ms_M_IFNg.fcs	CD8+T cells	CD8+T cells	T Cells	Nd144Di	pMAPKAPK2	IFNg	MS5	M	Mouse	median	5.732396603
R35W9_MS5_Ms_M_IFNg.fcs	CD8+T cells	CD8+T cells	T Cells	Nd145Di	pCREB	IFNg	MS5	M	Mouse	median	28.13249588
R35W9_MS5_Ms_M_IFNg.fcs	CD8+T cells	CD8+T cells	T Cells	Nd146Di	pPLCg2	IFNg	MS5	M	Mouse	median	7.698438168
R35W9_MS5_Ms_M_IFNg.fcs	CD8+T cells	CD8+T cells	T Cells	Sm147Di	pSTAT1	IFNg	MS5	M	Mouse	median	3.83525157
R35W9_MS5_Ms_M_IFNg.fcs	CD8+T cells	CD8+T cells	T Cells	Sm149Di	pSTAT5	IFNg	MS5	M	Mouse	median	11.6281147
R35W9_MS5_Ms_M_IFNg.fcs	CD8+T cells	CD8+T cells	T Cells	Sm150Di	pS6	IFNg	MS5	M	Mouse	median	37.38828278
R35W9_MS5_Ms_M_IFNg.fcs	CD8+T cells	CD8+T cells	T Cells	Sm152Di	pErk1/2	IFNg	MS5	M	Mouse	median	10.11872959
R35W9_MS5_Ms_M_IFNg.fcs	CD8+T cells	CD8+T cells	T Cells	Sm154Di	pP38	IFNg	MS5	M	Mouse	median	4.972813606
R35W9_MS5_Ms_M_IFNg.fcs	CD8+T cells	CD8+T cells	T Cells	Gd160Di	pZap70/Syk	IFNg	MS5	M	Mouse	median	2.549929857
R35W9_MS5_Ms_M_IFNg.fcs	CD8+T cells	CD8+T cells	T Cells	Dy161Di	pTBK1	IFNg	MS5	M	Mouse	median	2.766954899
R35W9_MS5_Ms_M_IFNg.fcs	CD8+T cells	CD8+T cells	T Cells	Ho165Di	pSTAT6	IFNg	MS5	M	Mouse	median	10.24085236
R35W9_MS5_Ms_M_IFNg.fcs	CD8+T cells	CD8+T cells	T Cells	Er170Di	pSTAT4	IFNg	MS5	M	Mouse	median	3.64821434
R35W9_MS5_Ms_M_IFNg.fcs	CD8+T cells	CD8+T cells	T Cells	Yb172Di	p4E-BP1	IFNg	MS5	M	Mouse	median	5.005793095
R35W9_MS5_Ms_M_IFNg.fcs	CD8+T cells	CD8+T cells	T Cells	Tm169Di	Ki67	IFNg	MS5	M	Mouse	median	9.066458702
R35W9_MS5_Ms_M_IFNg.fcs	CD8+T cells	CD8+T cells	T Cells	Dy163Di	IkBa	IFNg	MS5	M	Mouse	median	17.39962196
R35W9_MS5_Ms_M_IFNg.fcs	CD4+T cells	CD4+T cells	T Cells	La139Di	pSTAT3	IFNg	MS5	M	Mouse	median	15.48635292
R35W9_MS5_Ms_M_IFNg.fcs	CD4+T cells	CD4+T cells	T Cells	Nd144Di	pMAPKAPK2	IFNg	MS5	M	Mouse	median	6.106737137
R35W9_MS5_Ms_M_IFNg.fcs	CD4+T cells	CD4+T cells	T Cells	Nd145Di	pCREB	IFNg	MS5	M	Mouse	median	36.22350311
R35W9_MS5_Ms_M_IFNg.fcs	CD4+T cells	CD4+T cells	T Cells	Nd146Di	pPLCg2	IFNg	MS5	M	Mouse	median	6.568175316
R35W9_MS5_Ms_M_IFNg.fcs	CD4+T cells	CD4+T cells	T Cells	Sm147Di	pSTAT1	IFNg	MS5	M	Mouse	median	3.964001894
R35W9_MS5_Ms_M_IFNg.fcs	CD4+T cells	CD4+T cells	T Cells	Sm149Di	pSTAT5	IFNg	MS5	M	Mouse	median	9.819225311
R35W9_MS5_Ms_M_IFNg.fcs	CD4+T cells	CD4+T cells	T Cells	Sm150Di	pS6	IFNg	MS5	M	Mouse	median	35.18673706
R35W9_MS5_Ms_M_IFNg.fcs	CD4+T cells	CD4+T cells	T Cells	Sm152Di	pErk1/2	IFNg	MS5	M	Mouse	median	10.24049377
R35W9_MS5_Ms_M_IFNg.fcs	CD4+T cells	CD4+T cells	T Cells	Sm154Di	pP38	IFNg	MS5	M	Mouse	median	4.199323177
R35W9_MS5_Ms_M_IFNg.fcs	CD4+T cells	CD4+T cells	T Cells	Gd160Di	pZap70/Syk	IFNg	MS5	M	Mouse	median	2.729938745
R35W9_MS5_Ms_M_IFNg.fcs	CD4+T cells	CD4+T cells	T Cells	Dy161Di	pTBK1	IFNg	MS5	M	Mouse	median	2.45078516
R35W9_MS5_Ms_M_IFNg.fcs	CD4+T cells	CD4+T cells	T Cells	Ho165Di	pSTAT6	IFNg	MS5	M	Mouse	median	9.771645546
R35W9_MS5_Ms_M_IFNg.fcs	CD4+T cells	CD4+T cells	T Cells	Er170Di	pSTAT4	IFNg	MS5	M	Mouse	median	3.214334249
R35W9_MS5_Ms_M_IFNg.fcs	CD4+T cells	CD4+T cells	T Cells	Yb172Di	p4E-BP1	IFNg	MS5	M	Mouse	median	6.486718655
R35W9_MS5_Ms_M_IFNg.fcs	CD4+T cells	CD4+T cells	T Cells	Tm169Di	Ki67	IFNg	MS5	M	Mouse	median	8.239788055
R35W9_MS5_Ms_M_IFNg.fcs	CD4+T cells	CD4+T cells	T Cells	Dy163Di	IkBa	IFNg	MS5	M	Mouse	median	17.77410316
R35W9_MS5_Ms_M_IFNg.fcs	CD4+/CD8+	CD4+/CD8+	T Cells	La139Di	pSTAT3	IFNg	MS5	M	Mouse	median	26.98585224
R35W9_MS5_Ms_M_IFNg.fcs	CD4+/CD8+	CD4+/CD8+	T Cells	Nd144Di	pMAPKAPK2	IFNg	MS5	M	Mouse	median	8.404735088
R35W9_MS5_Ms_M_IFNg.fcs	CD4+/CD8+	CD4+/CD8+	T Cells	Nd145Di	pCREB	IFNg	MS5	M	Mouse	median	49.29612923
R35W9_MS5_Ms_M_IFNg.fcs	CD4+/CD8+	CD4+/CD8+	T Cells	Nd146Di	pPLCg2	IFNg	MS5	M	Mouse	median	11.33960009
R35W9_MS5_Ms_M_IFNg.fcs	CD4+/CD8+	CD4+/CD8+	T Cells	Sm147Di	pSTAT1	IFNg	MS5	M	Mouse	median	7.043171167
R35W9_MS5_Ms_M_IFNg.fcs	CD4+/CD8+	CD4+/CD8+	T Cells	Sm149Di	pSTAT5	IFNg	MS5	M	Mouse	median	12.79788542
R35W9_MS5_Ms_M_IFNg.fcs	CD4+/CD8+	CD4+/CD8+	T Cells	Sm150Di	pS6	IFNg	MS5	M	Mouse	median	56.2822094
R35W9_MS5_Ms_M_IFNg.fcs	CD4+/CD8+	CD4+/CD8+	T Cells	Sm152Di	pErk1/2	IFNg	MS5	M	Mouse	median	15.42002773
R35W9_MS5_Ms_M_IFNg.fcs	CD4+/CD8+	CD4+/CD8+	T Cells	Sm154Di	pP38	IFNg	MS5	M	Mouse	median	6.799403667
R35W9_MS5_Ms_M_IFNg.fcs	CD4+/CD8+	CD4+/CD8+	T Cells	Gd160Di	pZap70/Syk	IFNg	MS5	M	Mouse	median	3.087672949
R35W9_MS5_Ms_M_IFNg.fcs	CD4+/CD8+	CD4+/CD8+	T Cells	Dy161Di	pTBK1	IFNg	MS5	M	Mouse	median	4.021785259
R35W9_MS5_Ms_M_IFNg.fcs	CD4+/CD8+	CD4+/CD8+	T Cells	Ho165Di	pSTAT6	IFNg	MS5	M	Mouse	median	18.49427223
R35W9_MS5_Ms_M_IFNg.fcs	CD4+/CD8+	CD4+/CD8+	T Cells	Er170Di	pSTAT4	IFNg	MS5	M	Mouse	median	5.201469421
R35W9_MS5_Ms_M_IFNg.fcs	CD4+/CD8+	CD4+/CD8+	T Cells	Yb172Di	p4E-BP1	IFNg	MS5	M	Mouse	median	7.038971901
R35W9_MS5_Ms_M_IFNg.fcs	CD4+/CD8+	CD4+/CD8+	T Cells	Tm169Di	Ki67	IFNg	MS5	M	Mouse	median	14.56872034
R35W9_MS5_Ms_M_IFNg.fcs	CD4+/CD8+	CD4+/CD8+	T Cells	Dy163Di	IkBa	IFNg	MS5	M	Mouse	median	31.64619255
R35W9_MS5_Ms_M_IFNb.fcs	Neutrophils	Neutrophils	Non-Basophils	La139Di	pSTAT3	IFNb	MS5	M	Mouse	median	39.7205162
R35W9_MS5_Ms_M_IFNb.fcs	Neutrophils	Neutrophils	Non-Basophils	Nd144Di	pMAPKAPK2	IFNb	MS5	M	Mouse	median	10.41152
R35W9_MS5_Ms_M_IFNb.fcs	Neutrophils	Neutrophils	Non-Basophils	Nd145Di	pCREB	IFNb	MS5	M	Mouse	median	34.43399811
R35W9_MS5_Ms_M_IFNb.fcs	Neutrophils	Neutrophils	Non-Basophils	Nd146Di	pPLCg2	IFNb	MS5	M	Mouse	median	8.210076332
R35W9_MS5_Ms_M_IFNb.fcs	Neutrophils	Neutrophils	Non-Basophils	Sm147Di	pSTAT1	IFNb	MS5	M	Mouse	median	7.33731699
R35W9_MS5_Ms_M_IFNb.fcs	Neutrophils	Neutrophils	Non-Basophils	Sm149Di	pSTAT5	IFNb	MS5	M	Mouse	median	7.448127747
R35W9_MS5_Ms_M_IFNb.fcs	Neutrophils	Neutrophils	Non-Basophils	Sm150Di	pS6	IFNb	MS5	M	Mouse	median	58.95670319
R35W9_MS5_Ms_M_IFNb.fcs	Neutrophils	Neutrophils	Non-Basophils	Sm152Di	pErk1/2	IFNb	MS5	M	Mouse	median	20.21191597
R35W9_MS5_Ms_M_IFNb.fcs	Neutrophils	Neutrophils	Non-Basophils	Sm154Di	pP38	IFNb	MS5	M	Mouse	median	5.337132454
R35W9_MS5_Ms_M_IFNb.fcs	Neutrophils	Neutrophils	Non-Basophils	Gd160Di	pZap70/Syk	IFNb	MS5	M	Mouse	median	4.483775139
R35W9_MS5_Ms_M_IFNb.fcs	Neutrophils	Neutrophils	Non-Basophils	Dy161Di	pTBK1	IFNb	MS5	M	Mouse	median	2.13389492
R35W9_MS5_Ms_M_IFNb.fcs	Neutrophils	Neutrophils	Non-Basophils	Ho165Di	pSTAT6	IFNb	MS5	M	Mouse	median	4.216812611
R35W9_MS5_Ms_M_IFNb.fcs	Neutrophils	Neutrophils	Non-Basophils	Er170Di	pSTAT4	IFNb	MS5	M	Mouse	median	2.917490482
R35W9_MS5_Ms_M_IFNb.fcs	Neutrophils	Neutrophils	Non-Basophils	Yb172Di	p4E-BP1	IFNb	MS5	M	Mouse	median	5.080439568
R35W9_MS5_Ms_M_IFNb.fcs	Neutrophils	Neutrophils	Non-Basophils	Tm169Di	Ki67	IFNb	MS5	M	Mouse	median	49.5207634
R35W9_MS5_Ms_M_IFNb.fcs	Neutrophils	Neutrophils	Non-Basophils	Dy163Di	IkBa	IFNb	MS5	M	Mouse	median	4.117603779
R35W9_MS5_Ms_M_IFNb.fcs	B Cells	B Cells	CD45+ CD66-	La139Di	pSTAT3	IFNb	MS5	M	Mouse	median	20.5796032
R35W9_MS5_Ms_M_IFNb.fcs	B Cells	B Cells	CD45+ CD66-	Nd144Di	pMAPKAPK2	IFNb	MS5	M	Mouse	median	4.496956348
R35W9_MS5_Ms_M_IFNb.fcs	B Cells	B Cells	CD45+ CD66-	Nd145Di	pCREB	IFNb	MS5	M	Mouse	median	25.21672249
R35W9_MS5_Ms_M_IFNb.fcs	B Cells	B Cells	CD45+ CD66-	Nd146Di	pPLCg2	IFNb	MS5	M	Mouse	median	7.119534016
R35W9_MS5_Ms_M_IFNb.fcs	B Cells	B Cells	CD45+ CD66-	Sm147Di	pSTAT1	IFNb	MS5	M	Mouse	median	8.153708458
R35W9_MS5_Ms_M_IFNb.fcs	B Cells	B Cells	CD45+ CD66-	Sm149Di	pSTAT5	IFNb	MS5	M	Mouse	median	6.422410488
R35W9_MS5_Ms_M_IFNb.fcs	B Cells	B Cells	CD45+ CD66-	Sm150Di	pS6	IFNb	MS5	M	Mouse	median	27.96777153
R35W9_MS5_Ms_M_IFNb.fcs	B Cells	B Cells	CD45+ CD66-	Sm152Di	pErk1/2	IFNb	MS5	M	Mouse	median	6.450240135
R35W9_MS5_Ms_M_IFNb.fcs	B Cells	B Cells	CD45+ CD66-	Sm154Di	pP38	IFNb	MS5	M	Mouse	median	3.081594467
R35W9_MS5_Ms_M_IFNb.fcs	B Cells	B Cells	CD45+ CD66-	Gd160Di	pZap70/Syk	IFNb	MS5	M	Mouse	median	2.206817627
R35W9_MS5_Ms_M_IFNb.fcs	B Cells	B Cells	CD45+ CD66-	Dy161Di	pTBK1	IFNb	MS5	M	Mouse	median	4.077092171
R35W9_MS5_Ms_M_IFNb.fcs	B Cells	B Cells	CD45+ CD66-	Ho165Di	pSTAT6	IFNb	MS5	M	Mouse	median	8.529406548
R35W9_MS5_Ms_M_IFNb.fcs	B Cells	B Cells	CD45+ CD66-	Er170Di	pSTAT4	IFNb	MS5	M	Mouse	median	4.158067703
R35W9_MS5_Ms_M_IFNb.fcs	B Cells	B Cells	CD45+ CD66-	Yb172Di	p4E-BP1	IFNb	MS5	M	Mouse	median	10.2119894
R35W9_MS5_Ms_M_IFNb.fcs	B Cells	B Cells	CD45+ CD66-	Tm169Di	Ki67	IFNb	MS5	M	Mouse	median	8.118439674
R35W9_MS5_Ms_M_IFNb.fcs	B Cells	B Cells	CD45+ CD66-	Dy163Di	IkBa	IFNb	MS5	M	Mouse	median	23.32078743
R35W9_MS5_Ms_M_IFNb.fcs	Mouse Basophils	Mouse Basophils	ms NK1.1-	La139Di	pSTAT3	IFNb	MS5	M	Mouse	median	16.03853607
R35W9_MS5_Ms_M_IFNb.fcs	Mouse Basophils	Mouse Basophils	ms NK1.1-	Nd144Di	pMAPKAPK2	IFNb	MS5	M	Mouse	median	12.11141634
R35W9_MS5_Ms_M_IFNb.fcs	Mouse Basophils	Mouse Basophils	ms NK1.1-	Nd145Di	pCREB	IFNb	MS5	M	Mouse	median	36.9890728
R35W9_MS5_Ms_M_IFNb.fcs	Mouse Basophils	Mouse Basophils	ms NK1.1-	Nd146Di	pPLCg2	IFNb	MS5	M	Mouse	median	5.899672985
R35W9_MS5_Ms_M_IFNb.fcs	Mouse Basophils	Mouse Basophils	ms NK1.1-	Sm147Di	pSTAT1	IFNb	MS5	M	Mouse	median	3.290976882
R35W9_MS5_Ms_M_IFNb.fcs	Mouse Basophils	Mouse Basophils	ms NK1.1-	Sm149Di	pSTAT5	IFNb	MS5	M	Mouse	median	6.41427803
R35W9_MS5_Ms_M_IFNb.fcs	Mouse Basophils	Mouse Basophils	ms NK1.1-	Sm150Di	pS6	IFNb	MS5	M	Mouse	median	30.06317711
R35W9_MS5_Ms_M_IFNb.fcs	Mouse Basophils	Mouse Basophils	ms NK1.1-	Sm152Di	pErk1/2	IFNb	MS5	M	Mouse	median	12.76747417
R35W9_MS5_Ms_M_IFNb.fcs	Mouse Basophils	Mouse Basophils	ms NK1.1-	Sm154Di	pP38	IFNb	MS5	M	Mouse	median	5.581593275
R35W9_MS5_Ms_M_IFNb.fcs	Mouse Basophils	Mouse Basophils	ms NK1.1-	Gd160Di	pZap70/Syk	IFNb	MS5	M	Mouse	median	1.945987701
R35W9_MS5_Ms_M_IFNb.fcs	Mouse Basophils	Mouse Basophils	ms NK1.1-	Dy161Di	pTBK1	IFNb	MS5	M	Mouse	median	11.85809278
R35W9_MS5_Ms_M_IFNb.fcs	Mouse Basophils	Mouse Basophils	ms NK1.1-	Ho165Di	pSTAT6	IFNb	MS5	M	Mouse	median	16.57506084
R35W9_MS5_Ms_M_IFNb.fcs	Mouse Basophils	Mouse Basophils	ms NK1.1-	Er170Di	pSTAT4	IFNb	MS5	M	Mouse	median	3.755272269
R35W9_MS5_Ms_M_IFNb.fcs	Mouse Basophils	Mouse Basophils	ms NK1.1-	Yb172Di	p4E-BP1	IFNb	MS5	M	Mouse	median	6.091721296
R35W9_MS5_Ms_M_IFNb.fcs	Mouse Basophils	Mouse Basophils	ms NK1.1-	Tm169Di	Ki67	IFNb	MS5	M	Mouse	median	134.2365265
R35W9_MS5_Ms_M_IFNb.fcs	Mouse Basophils	Mouse Basophils	ms NK1.1-	Dy163Di	IkBa	IFNb	MS5	M	Mouse	median	40.65946579
R35W9_MS5_Ms_M_IFNb.fcs	ms NK1.1+/CD115-	ms NK1.1+/CD115-	CD19- CD3-	La139Di	pSTAT3	IFNb	MS5	M	Mouse	median	11.02521324
R35W9_MS5_Ms_M_IFNb.fcs	ms NK1.1+/CD115-	ms NK1.1+/CD115-	CD19- CD3-	Nd144Di	pMAPKAPK2	IFNb	MS5	M	Mouse	median	4.220451832
R35W9_MS5_Ms_M_IFNb.fcs	ms NK1.1+/CD115-	ms NK1.1+/CD115-	CD19- CD3-	Nd145Di	pCREB	IFNb	MS5	M	Mouse	median	19.90942383
R35W9_MS5_Ms_M_IFNb.fcs	ms NK1.1+/CD115-	ms NK1.1+/CD115-	CD19- CD3-	Nd146Di	pPLCg2	IFNb	MS5	M	Mouse	median	6.499290466
R35W9_MS5_Ms_M_IFNb.fcs	ms NK1.1+/CD115-	ms NK1.1+/CD115-	CD19- CD3-	Sm147Di	pSTAT1	IFNb	MS5	M	Mouse	median	2.507872581
R35W9_MS5_Ms_M_IFNb.fcs	ms NK1.1+/CD115-	ms NK1.1+/CD115-	CD19- CD3-	Sm149Di	pSTAT5	IFNb	MS5	M	Mouse	median	6.845427036
R35W9_MS5_Ms_M_IFNb.fcs	ms NK1.1+/CD115-	ms NK1.1+/CD115-	CD19- CD3-	Sm150Di	pS6	IFNb	MS5	M	Mouse	median	21.26190758
R35W9_MS5_Ms_M_IFNb.fcs	ms NK1.1+/CD115-	ms NK1.1+/CD115-	CD19- CD3-	Sm152Di	pErk1/2	IFNb	MS5	M	Mouse	median	6.542562962
R35W9_MS5_Ms_M_IFNb.fcs	ms NK1.1+/CD115-	ms NK1.1+/CD115-	CD19- CD3-	Sm154Di	pP38	IFNb	MS5	M	Mouse	median	2.976889849
R35W9_MS5_Ms_M_IFNb.fcs	ms NK1.1+/CD115-	ms NK1.1+/CD115-	CD19- CD3-	Gd160Di	pZap70/Syk	IFNb	MS5	M	Mouse	median	1.47766614
R35W9_MS5_Ms_M_IFNb.fcs	ms NK1.1+/CD115-	ms NK1.1+/CD115-	CD19- CD3-	Dy161Di	pTBK1	IFNb	MS5	M	Mouse	median	3.068884373
R35W9_MS5_Ms_M_IFNb.fcs	ms NK1.1+/CD115-	ms NK1.1+/CD115-	CD19- CD3-	Ho165Di	pSTAT6	IFNb	MS5	M	Mouse	median	8.862421036
R35W9_MS5_Ms_M_IFNb.fcs	ms NK1.1+/CD115-	ms NK1.1+/CD115-	CD19- CD3-	Er170Di	pSTAT4	IFNb	MS5	M	Mouse	median	6.438559532
R35W9_MS5_Ms_M_IFNb.fcs	ms NK1.1+/CD115-	ms NK1.1+/CD115-	CD19- CD3-	Yb172Di	p4E-BP1	IFNb	MS5	M	Mouse	median	5.074263573
R35W9_MS5_Ms_M_IFNb.fcs	ms NK1.1+/CD115-	ms NK1.1+/CD115-	CD19- CD3-	Tm169Di	Ki67	IFNb	MS5	M	Mouse	median	10.47067833
R35W9_MS5_Ms_M_IFNb.fcs	ms NK1.1+/CD115-	ms NK1.1+/CD115-	CD19- CD3-	Dy163Di	IkBa	IFNb	MS5	M	Mouse	median	16.74380684
R35W9_MS5_Ms_M_IFNb.fcs	Mouse pDCs	Mouse pDCs	FcεRIα-	La139Di	pSTAT3	IFNb	MS5	M	Mouse	median	46.9095192
R35W9_MS5_Ms_M_IFNb.fcs	Mouse pDCs	Mouse pDCs	FcεRIα-	Nd144Di	pMAPKAPK2	IFNb	MS5	M	Mouse	median	7.576571941
R35W9_MS5_Ms_M_IFNb.fcs	Mouse pDCs	Mouse pDCs	FcεRIα-	Nd145Di	pCREB	IFNb	MS5	M	Mouse	median	28.58913231
R35W9_MS5_Ms_M_IFNb.fcs	Mouse pDCs	Mouse pDCs	FcεRIα-	Nd146Di	pPLCg2	IFNb	MS5	M	Mouse	median	19.74278641
R35W9_MS5_Ms_M_IFNb.fcs	Mouse pDCs	Mouse pDCs	FcεRIα-	Sm147Di	pSTAT1	IFNb	MS5	M	Mouse	median	33.075737
R35W9_MS5_Ms_M_IFNb.fcs	Mouse pDCs	Mouse pDCs	FcεRIα-	Sm149Di	pSTAT5	IFNb	MS5	M	Mouse	median	15.20000744
R35W9_MS5_Ms_M_IFNb.fcs	Mouse pDCs	Mouse pDCs	FcεRIα-	Sm150Di	pS6	IFNb	MS5	M	Mouse	median	58.50310898
R35W9_MS5_Ms_M_IFNb.fcs	Mouse pDCs	Mouse pDCs	FcεRIα-	Sm152Di	pErk1/2	IFNb	MS5	M	Mouse	median	13.06890583
R35W9_MS5_Ms_M_IFNb.fcs	Mouse pDCs	Mouse pDCs	FcεRIα-	Sm154Di	pP38	IFNb	MS5	M	Mouse	median	3.815129995
R35W9_MS5_Ms_M_IFNb.fcs	Mouse pDCs	Mouse pDCs	FcεRIα-	Gd160Di	pZap70/Syk	IFNb	MS5	M	Mouse	median	2.526985645
R35W9_MS5_Ms_M_IFNb.fcs	Mouse pDCs	Mouse pDCs	FcεRIα-	Dy161Di	pTBK1	IFNb	MS5	M	Mouse	median	1.593249917
R35W9_MS5_Ms_M_IFNb.fcs	Mouse pDCs	Mouse pDCs	FcεRIα-	Ho165Di	pSTAT6	IFNb	MS5	M	Mouse	median	21.0551815
R35W9_MS5_Ms_M_IFNb.fcs	Mouse pDCs	Mouse pDCs	FcεRIα-	Er170Di	pSTAT4	IFNb	MS5	M	Mouse	median	3.901910543
R35W9_MS5_Ms_M_IFNb.fcs	Mouse pDCs	Mouse pDCs	FcεRIα-	Yb172Di	p4E-BP1	IFNb	MS5	M	Mouse	median	8.476482391
R35W9_MS5_Ms_M_IFNb.fcs	Mouse pDCs	Mouse pDCs	FcεRIα-	Tm169Di	Ki67	IFNb	MS5	M	Mouse	median	10.38546085
R35W9_MS5_Ms_M_IFNb.fcs	Mouse pDCs	Mouse pDCs	FcεRIα-	Dy163Di	IkBa	IFNb	MS5	M	Mouse	median	11.80731964
R35W9_MS5_Ms_M_IFNb.fcs	Mouse Ly6C+	Mouse Ly6C+	ms CD115+/NK1.1-	La139Di	pSTAT3	IFNb	MS5	M	Mouse	median	26.45781136
R35W9_MS5_Ms_M_IFNb.fcs	Mouse Ly6C+	Mouse Ly6C+	ms CD115+/NK1.1-	Nd144Di	pMAPKAPK2	IFNb	MS5	M	Mouse	median	7.706057072
R35W9_MS5_Ms_M_IFNb.fcs	Mouse Ly6C+	Mouse Ly6C+	ms CD115+/NK1.1-	Nd145Di	pCREB	IFNb	MS5	M	Mouse	median	25.24542236
R35W9_MS5_Ms_M_IFNb.fcs	Mouse Ly6C+	Mouse Ly6C+	ms CD115+/NK1.1-	Nd146Di	pPLCg2	IFNb	MS5	M	Mouse	median	9.720575333
R35W9_MS5_Ms_M_IFNb.fcs	Mouse Ly6C+	Mouse Ly6C+	ms CD115+/NK1.1-	Sm147Di	pSTAT1	IFNb	MS5	M	Mouse	median	7.768564701
R35W9_MS5_Ms_M_IFNb.fcs	Mouse Ly6C+	Mouse Ly6C+	ms CD115+/NK1.1-	Sm149Di	pSTAT5	IFNb	MS5	M	Mouse	median	15.27943039
R35W9_MS5_Ms_M_IFNb.fcs	Mouse Ly6C+	Mouse Ly6C+	ms CD115+/NK1.1-	Sm150Di	pS6	IFNb	MS5	M	Mouse	median	69.53207397
R35W9_MS5_Ms_M_IFNb.fcs	Mouse Ly6C+	Mouse Ly6C+	ms CD115+/NK1.1-	Sm152Di	pErk1/2	IFNb	MS5	M	Mouse	median	11.16474342
R35W9_MS5_Ms_M_IFNb.fcs	Mouse Ly6C+	Mouse Ly6C+	ms CD115+/NK1.1-	Sm154Di	pP38	IFNb	MS5	M	Mouse	median	4.312708378
R35W9_MS5_Ms_M_IFNb.fcs	Mouse Ly6C+	Mouse Ly6C+	ms CD115+/NK1.1-	Gd160Di	pZap70/Syk	IFNb	MS5	M	Mouse	median	1.915640354
R35W9_MS5_Ms_M_IFNb.fcs	Mouse Ly6C+	Mouse Ly6C+	ms CD115+/NK1.1-	Dy161Di	pTBK1	IFNb	MS5	M	Mouse	median	5.213179111
R35W9_MS5_Ms_M_IFNb.fcs	Mouse Ly6C+	Mouse Ly6C+	ms CD115+/NK1.1-	Ho165Di	pSTAT6	IFNb	MS5	M	Mouse	median	11.64898682
R35W9_MS5_Ms_M_IFNb.fcs	Mouse Ly6C+	Mouse Ly6C+	ms CD115+/NK1.1-	Er170Di	pSTAT4	IFNb	MS5	M	Mouse	median	4.382072926
R35W9_MS5_Ms_M_IFNb.fcs	Mouse Ly6C+	Mouse Ly6C+	ms CD115+/NK1.1-	Yb172Di	p4E-BP1	IFNb	MS5	M	Mouse	median	16.41935539
R35W9_MS5_Ms_M_IFNb.fcs	Mouse Ly6C+	Mouse Ly6C+	ms CD115+/NK1.1-	Tm169Di	Ki67	IFNb	MS5	M	Mouse	median	120.1901016
R35W9_MS5_Ms_M_IFNb.fcs	Mouse Ly6C+	Mouse Ly6C+	ms CD115+/NK1.1-	Dy163Di	IkBa	IFNb	MS5	M	Mouse	median	32.37048721
R35W9_MS5_Ms_M_IFNb.fcs	Mouse Ly6C-	Mouse Ly6C-	ms CD115+/NK1.1-	La139Di	pSTAT3	IFNb	MS5	M	Mouse	median	17.35100937
R35W9_MS5_Ms_M_IFNb.fcs	Mouse Ly6C-	Mouse Ly6C-	ms CD115+/NK1.1-	Nd144Di	pMAPKAPK2	IFNb	MS5	M	Mouse	median	6.493281841
R35W9_MS5_Ms_M_IFNb.fcs	Mouse Ly6C-	Mouse Ly6C-	ms CD115+/NK1.1-	Nd145Di	pCREB	IFNb	MS5	M	Mouse	median	30.24051857
R35W9_MS5_Ms_M_IFNb.fcs	Mouse Ly6C-	Mouse Ly6C-	ms CD115+/NK1.1-	Nd146Di	pPLCg2	IFNb	MS5	M	Mouse	median	15.62300491
R35W9_MS5_Ms_M_IFNb.fcs	Mouse Ly6C-	Mouse Ly6C-	ms CD115+/NK1.1-	Sm147Di	pSTAT1	IFNb	MS5	M	Mouse	median	3.782861233
R35W9_MS5_Ms_M_IFNb.fcs	Mouse Ly6C-	Mouse Ly6C-	ms CD115+/NK1.1-	Sm149Di	pSTAT5	IFNb	MS5	M	Mouse	median	10.49883652
R35W9_MS5_Ms_M_IFNb.fcs	Mouse Ly6C-	Mouse Ly6C-	ms CD115+/NK1.1-	Sm150Di	pS6	IFNb	MS5	M	Mouse	median	48.12046814
R35W9_MS5_Ms_M_IFNb.fcs	Mouse Ly6C-	Mouse Ly6C-	ms CD115+/NK1.1-	Sm152Di	pErk1/2	IFNb	MS5	M	Mouse	median	8.959925652
R35W9_MS5_Ms_M_IFNb.fcs	Mouse Ly6C-	Mouse Ly6C-	ms CD115+/NK1.1-	Sm154Di	pP38	IFNb	MS5	M	Mouse	median	4.1479249
R35W9_MS5_Ms_M_IFNb.fcs	Mouse Ly6C-	Mouse Ly6C-	ms CD115+/NK1.1-	Gd160Di	pZap70/Syk	IFNb	MS5	M	Mouse	median	2.375104427
R35W9_MS5_Ms_M_IFNb.fcs	Mouse Ly6C-	Mouse Ly6C-	ms CD115+/NK1.1-	Dy161Di	pTBK1	IFNb	MS5	M	Mouse	median	6.211066246
R35W9_MS5_Ms_M_IFNb.fcs	Mouse Ly6C-	Mouse Ly6C-	ms CD115+/NK1.1-	Ho165Di	pSTAT6	IFNb	MS5	M	Mouse	median	10.91880608
R35W9_MS5_Ms_M_IFNb.fcs	Mouse Ly6C-	Mouse Ly6C-	ms CD115+/NK1.1-	Er170Di	pSTAT4	IFNb	MS5	M	Mouse	median	5.152943611
R35W9_MS5_Ms_M_IFNb.fcs	Mouse Ly6C-	Mouse Ly6C-	ms CD115+/NK1.1-	Yb172Di	p4E-BP1	IFNb	MS5	M	Mouse	median	12.47625923
R35W9_MS5_Ms_M_IFNb.fcs	Mouse Ly6C-	Mouse Ly6C-	ms CD115+/NK1.1-	Tm169Di	Ki67	IFNb	MS5	M	Mouse	median	14.59278965
R35W9_MS5_Ms_M_IFNb.fcs	Mouse Ly6C-	Mouse Ly6C-	ms CD115+/NK1.1-	Dy163Di	IkBa	IFNb	MS5	M	Mouse	median	35.16072083
R35W9_MS5_Ms_M_IFNb.fcs	CD8+T cells	CD8+T cells	T Cells	La139Di	pSTAT3	IFNb	MS5	M	Mouse	median	15.66500854
R35W9_MS5_Ms_M_IFNb.fcs	CD8+T cells	CD8+T cells	T Cells	Nd144Di	pMAPKAPK2	IFNb	MS5	M	Mouse	median	5.382824898
R35W9_MS5_Ms_M_IFNb.fcs	CD8+T cells	CD8+T cells	T Cells	Nd145Di	pCREB	IFNb	MS5	M	Mouse	median	27.39570427
R35W9_MS5_Ms_M_IFNb.fcs	CD8+T cells	CD8+T cells	T Cells	Nd146Di	pPLCg2	IFNb	MS5	M	Mouse	median	8.03732872
R35W9_MS5_Ms_M_IFNb.fcs	CD8+T cells	CD8+T cells	T Cells	Sm147Di	pSTAT1	IFNb	MS5	M	Mouse	median	4.20321703
R35W9_MS5_Ms_M_IFNb.fcs	CD8+T cells	CD8+T cells	T Cells	Sm149Di	pSTAT5	IFNb	MS5	M	Mouse	median	12.03967476
R35W9_MS5_Ms_M_IFNb.fcs	CD8+T cells	CD8+T cells	T Cells	Sm150Di	pS6	IFNb	MS5	M	Mouse	median	37.33831787
R35W9_MS5_Ms_M_IFNb.fcs	CD8+T cells	CD8+T cells	T Cells	Sm152Di	pErk1/2	IFNb	MS5	M	Mouse	median	10.02494526
R35W9_MS5_Ms_M_IFNb.fcs	CD8+T cells	CD8+T cells	T Cells	Sm154Di	pP38	IFNb	MS5	M	Mouse	median	5.065747261
R35W9_MS5_Ms_M_IFNb.fcs	CD8+T cells	CD8+T cells	T Cells	Gd160Di	pZap70/Syk	IFNb	MS5	M	Mouse	median	2.6828897
R35W9_MS5_Ms_M_IFNb.fcs	CD8+T cells	CD8+T cells	T Cells	Dy161Di	pTBK1	IFNb	MS5	M	Mouse	median	2.574579954
R35W9_MS5_Ms_M_IFNb.fcs	CD8+T cells	CD8+T cells	T Cells	Ho165Di	pSTAT6	IFNb	MS5	M	Mouse	median	9.508880615
R35W9_MS5_Ms_M_IFNb.fcs	CD8+T cells	CD8+T cells	T Cells	Er170Di	pSTAT4	IFNb	MS5	M	Mouse	median	4.955280781
R35W9_MS5_Ms_M_IFNb.fcs	CD8+T cells	CD8+T cells	T Cells	Yb172Di	p4E-BP1	IFNb	MS5	M	Mouse	median	4.801176071
R35W9_MS5_Ms_M_IFNb.fcs	CD8+T cells	CD8+T cells	T Cells	Tm169Di	Ki67	IFNb	MS5	M	Mouse	median	8.606191635
R35W9_MS5_Ms_M_IFNb.fcs	CD8+T cells	CD8+T cells	T Cells	Dy163Di	IkBa	IFNb	MS5	M	Mouse	median	16.95853233
R35W9_MS5_Ms_M_IFNb.fcs	CD4+T cells	CD4+T cells	T Cells	La139Di	pSTAT3	IFNb	MS5	M	Mouse	median	14.93478966
R35W9_MS5_Ms_M_IFNb.fcs	CD4+T cells	CD4+T cells	T Cells	Nd144Di	pMAPKAPK2	IFNb	MS5	M	Mouse	median	5.755107403
R35W9_MS5_Ms_M_IFNb.fcs	CD4+T cells	CD4+T cells	T Cells	Nd145Di	pCREB	IFNb	MS5	M	Mouse	median	35.50148392
R35W9_MS5_Ms_M_IFNb.fcs	CD4+T cells	CD4+T cells	T Cells	Nd146Di	pPLCg2	IFNb	MS5	M	Mouse	median	6.568178177
R35W9_MS5_Ms_M_IFNb.fcs	CD4+T cells	CD4+T cells	T Cells	Sm147Di	pSTAT1	IFNb	MS5	M	Mouse	median	2.869880438
R35W9_MS5_Ms_M_IFNb.fcs	CD4+T cells	CD4+T cells	T Cells	Sm149Di	pSTAT5	IFNb	MS5	M	Mouse	median	10.34226131
R35W9_MS5_Ms_M_IFNb.fcs	CD4+T cells	CD4+T cells	T Cells	Sm150Di	pS6	IFNb	MS5	M	Mouse	median	34.48762894
R35W9_MS5_Ms_M_IFNb.fcs	CD4+T cells	CD4+T cells	T Cells	Sm152Di	pErk1/2	IFNb	MS5	M	Mouse	median	9.92380619
R35W9_MS5_Ms_M_IFNb.fcs	CD4+T cells	CD4+T cells	T Cells	Sm154Di	pP38	IFNb	MS5	M	Mouse	median	4.098199368
R35W9_MS5_Ms_M_IFNb.fcs	CD4+T cells	CD4+T cells	T Cells	Gd160Di	pZap70/Syk	IFNb	MS5	M	Mouse	median	2.670614243
R35W9_MS5_Ms_M_IFNb.fcs	CD4+T cells	CD4+T cells	T Cells	Dy161Di	pTBK1	IFNb	MS5	M	Mouse	median	2.344365358
R35W9_MS5_Ms_M_IFNb.fcs	CD4+T cells	CD4+T cells	T Cells	Ho165Di	pSTAT6	IFNb	MS5	M	Mouse	median	9.207033157
R35W9_MS5_Ms_M_IFNb.fcs	CD4+T cells	CD4+T cells	T Cells	Er170Di	pSTAT4	IFNb	MS5	M	Mouse	median	3.497225523
R35W9_MS5_Ms_M_IFNb.fcs	CD4+T cells	CD4+T cells	T Cells	Yb172Di	p4E-BP1	IFNb	MS5	M	Mouse	median	6.356879234
R35W9_MS5_Ms_M_IFNb.fcs	CD4+T cells	CD4+T cells	T Cells	Tm169Di	Ki67	IFNb	MS5	M	Mouse	median	7.918334007
R35W9_MS5_Ms_M_IFNb.fcs	CD4+T cells	CD4+T cells	T Cells	Dy163Di	IkBa	IFNb	MS5	M	Mouse	median	17.00790787
R35W9_MS5_Ms_M_IFNb.fcs	CD4+/CD8+	CD4+/CD8+	T Cells	La139Di	pSTAT3	IFNb	MS5	M	Mouse	median	26.77834606
R35W9_MS5_Ms_M_IFNb.fcs	CD4+/CD8+	CD4+/CD8+	T Cells	Nd144Di	pMAPKAPK2	IFNb	MS5	M	Mouse	median	9.737741947
R35W9_MS5_Ms_M_IFNb.fcs	CD4+/CD8+	CD4+/CD8+	T Cells	Nd145Di	pCREB	IFNb	MS5	M	Mouse	median	58.77727699
R35W9_MS5_Ms_M_IFNb.fcs	CD4+/CD8+	CD4+/CD8+	T Cells	Nd146Di	pPLCg2	IFNb	MS5	M	Mouse	median	15.01328659
R35W9_MS5_Ms_M_IFNb.fcs	CD4+/CD8+	CD4+/CD8+	T Cells	Sm147Di	pSTAT1	IFNb	MS5	M	Mouse	median	6.281514168
R35W9_MS5_Ms_M_IFNb.fcs	CD4+/CD8+	CD4+/CD8+	T Cells	Sm149Di	pSTAT5	IFNb	MS5	M	Mouse	median	20.00083065
R35W9_MS5_Ms_M_IFNb.fcs	CD4+/CD8+	CD4+/CD8+	T Cells	Sm150Di	pS6	IFNb	MS5	M	Mouse	median	59.37298965
R35W9_MS5_Ms_M_IFNb.fcs	CD4+/CD8+	CD4+/CD8+	T Cells	Sm152Di	pErk1/2	IFNb	MS5	M	Mouse	median	17.78097916
R35W9_MS5_Ms_M_IFNb.fcs	CD4+/CD8+	CD4+/CD8+	T Cells	Sm154Di	pP38	IFNb	MS5	M	Mouse	median	7.108829498
R35W9_MS5_Ms_M_IFNb.fcs	CD4+/CD8+	CD4+/CD8+	T Cells	Gd160Di	pZap70/Syk	IFNb	MS5	M	Mouse	median	4.238861322
R35W9_MS5_Ms_M_IFNb.fcs	CD4+/CD8+	CD4+/CD8+	T Cells	Dy161Di	pTBK1	IFNb	MS5	M	Mouse	median	3.221624732
R35W9_MS5_Ms_M_IFNb.fcs	CD4+/CD8+	CD4+/CD8+	T Cells	Ho165Di	pSTAT6	IFNb	MS5	M	Mouse	median	19.08698177
R35W9_MS5_Ms_M_IFNb.fcs	CD4+/CD8+	CD4+/CD8+	T Cells	Er170Di	pSTAT4	IFNb	MS5	M	Mouse	median	6.262700558
R35W9_MS5_Ms_M_IFNb.fcs	CD4+/CD8+	CD4+/CD8+	T Cells	Yb172Di	p4E-BP1	IFNb	MS5	M	Mouse	median	7.342976093
R35W9_MS5_Ms_M_IFNb.fcs	CD4+/CD8+	CD4+/CD8+	T Cells	Tm169Di	Ki67	IFNb	MS5	M	Mouse	median	14.31494093
R35W9_MS5_Ms_M_IFNb.fcs	CD4+/CD8+	CD4+/CD8+	T Cells	Dy163Di	IkBa	IFNb	MS5	M	Mouse	median	27.49727058
R35W9_MS5_Ms_M_CD40L.fcs	Neutrophils	Neutrophils	Non-Basophils	La139Di	pSTAT3	CD40L	MS5	M	Mouse	median	41.28480911
R35W9_MS5_Ms_M_CD40L.fcs	Neutrophils	Neutrophils	Non-Basophils	Nd144Di	pMAPKAPK2	CD40L	MS5	M	Mouse	median	11.30776024
R35W9_MS5_Ms_M_CD40L.fcs	Neutrophils	Neutrophils	Non-Basophils	Nd145Di	pCREB	CD40L	MS5	M	Mouse	median	37.26935959
R35W9_MS5_Ms_M_CD40L.fcs	Neutrophils	Neutrophils	Non-Basophils	Nd146Di	pPLCg2	CD40L	MS5	M	Mouse	median	9.242390633
R35W9_MS5_Ms_M_CD40L.fcs	Neutrophils	Neutrophils	Non-Basophils	Sm147Di	pSTAT1	CD40L	MS5	M	Mouse	median	4.67632246
R35W9_MS5_Ms_M_CD40L.fcs	Neutrophils	Neutrophils	Non-Basophils	Sm149Di	pSTAT5	CD40L	MS5	M	Mouse	median	7.832871914
R35W9_MS5_Ms_M_CD40L.fcs	Neutrophils	Neutrophils	Non-Basophils	Sm150Di	pS6	CD40L	MS5	M	Mouse	median	65.10881805
R35W9_MS5_Ms_M_CD40L.fcs	Neutrophils	Neutrophils	Non-Basophils	Sm152Di	pErk1/2	CD40L	MS5	M	Mouse	median	21.66482544
R35W9_MS5_Ms_M_CD40L.fcs	Neutrophils	Neutrophils	Non-Basophils	Sm154Di	pP38	CD40L	MS5	M	Mouse	median	5.691435337
R35W9_MS5_Ms_M_CD40L.fcs	Neutrophils	Neutrophils	Non-Basophils	Gd160Di	pZap70/Syk	CD40L	MS5	M	Mouse	median	4.934135914
R35W9_MS5_Ms_M_CD40L.fcs	Neutrophils	Neutrophils	Non-Basophils	Dy161Di	pTBK1	CD40L	MS5	M	Mouse	median	2.431363344
R35W9_MS5_Ms_M_CD40L.fcs	Neutrophils	Neutrophils	Non-Basophils	Ho165Di	pSTAT6	CD40L	MS5	M	Mouse	median	4.564909458
R35W9_MS5_Ms_M_CD40L.fcs	Neutrophils	Neutrophils	Non-Basophils	Er170Di	pSTAT4	CD40L	MS5	M	Mouse	median	3.130081892
R35W9_MS5_Ms_M_CD40L.fcs	Neutrophils	Neutrophils	Non-Basophils	Yb172Di	p4E-BP1	CD40L	MS5	M	Mouse	median	5.852293968
R35W9_MS5_Ms_M_CD40L.fcs	Neutrophils	Neutrophils	Non-Basophils	Tm169Di	Ki67	CD40L	MS5	M	Mouse	median	52.51997757
R35W9_MS5_Ms_M_CD40L.fcs	Neutrophils	Neutrophils	Non-Basophils	Dy163Di	IkBa	CD40L	MS5	M	Mouse	median	4.292638302
R35W9_MS5_Ms_M_CD40L.fcs	B Cells	B Cells	CD45+ CD66-	La139Di	pSTAT3	CD40L	MS5	M	Mouse	median	21.41174984
R35W9_MS5_Ms_M_CD40L.fcs	B Cells	B Cells	CD45+ CD66-	Nd144Di	pMAPKAPK2	CD40L	MS5	M	Mouse	median	5.173774719
R35W9_MS5_Ms_M_CD40L.fcs	B Cells	B Cells	CD45+ CD66-	Nd145Di	pCREB	CD40L	MS5	M	Mouse	median	30.8393755
R35W9_MS5_Ms_M_CD40L.fcs	B Cells	B Cells	CD45+ CD66-	Nd146Di	pPLCg2	CD40L	MS5	M	Mouse	median	7.721085548
R35W9_MS5_Ms_M_CD40L.fcs	B Cells	B Cells	CD45+ CD66-	Sm147Di	pSTAT1	CD40L	MS5	M	Mouse	median	5.559453487
R35W9_MS5_Ms_M_CD40L.fcs	B Cells	B Cells	CD45+ CD66-	Sm149Di	pSTAT5	CD40L	MS5	M	Mouse	median	6.285951853
R35W9_MS5_Ms_M_CD40L.fcs	B Cells	B Cells	CD45+ CD66-	Sm150Di	pS6	CD40L	MS5	M	Mouse	median	30.26866817
R35W9_MS5_Ms_M_CD40L.fcs	B Cells	B Cells	CD45+ CD66-	Sm152Di	pErk1/2	CD40L	MS5	M	Mouse	median	6.968981266
R35W9_MS5_Ms_M_CD40L.fcs	B Cells	B Cells	CD45+ CD66-	Sm154Di	pP38	CD40L	MS5	M	Mouse	median	3.935218573
R35W9_MS5_Ms_M_CD40L.fcs	B Cells	B Cells	CD45+ CD66-	Gd160Di	pZap70/Syk	CD40L	MS5	M	Mouse	median	2.365658283
R35W9_MS5_Ms_M_CD40L.fcs	B Cells	B Cells	CD45+ CD66-	Dy161Di	pTBK1	CD40L	MS5	M	Mouse	median	4.494324207
R35W9_MS5_Ms_M_CD40L.fcs	B Cells	B Cells	CD45+ CD66-	Ho165Di	pSTAT6	CD40L	MS5	M	Mouse	median	9.056503773
R35W9_MS5_Ms_M_CD40L.fcs	B Cells	B Cells	CD45+ CD66-	Er170Di	pSTAT4	CD40L	MS5	M	Mouse	median	4.025631189
R35W9_MS5_Ms_M_CD40L.fcs	B Cells	B Cells	CD45+ CD66-	Yb172Di	p4E-BP1	CD40L	MS5	M	Mouse	median	10.92518377
R35W9_MS5_Ms_M_CD40L.fcs	B Cells	B Cells	CD45+ CD66-	Tm169Di	Ki67	CD40L	MS5	M	Mouse	median	8.699194908
R35W9_MS5_Ms_M_CD40L.fcs	B Cells	B Cells	CD45+ CD66-	Dy163Di	IkBa	CD40L	MS5	M	Mouse	median	17.03090477
R35W9_MS5_Ms_M_CD40L.fcs	Mouse Basophils	Mouse Basophils	ms NK1.1-	La139Di	pSTAT3	CD40L	MS5	M	Mouse	median	16.5285635
R35W9_MS5_Ms_M_CD40L.fcs	Mouse Basophils	Mouse Basophils	ms NK1.1-	Nd144Di	pMAPKAPK2	CD40L	MS5	M	Mouse	median	11.70090866
R35W9_MS5_Ms_M_CD40L.fcs	Mouse Basophils	Mouse Basophils	ms NK1.1-	Nd145Di	pCREB	CD40L	MS5	M	Mouse	median	41.23675346
R35W9_MS5_Ms_M_CD40L.fcs	Mouse Basophils	Mouse Basophils	ms NK1.1-	Nd146Di	pPLCg2	CD40L	MS5	M	Mouse	median	6.281703711
R35W9_MS5_Ms_M_CD40L.fcs	Mouse Basophils	Mouse Basophils	ms NK1.1-	Sm147Di	pSTAT1	CD40L	MS5	M	Mouse	median	2.524097681
R35W9_MS5_Ms_M_CD40L.fcs	Mouse Basophils	Mouse Basophils	ms NK1.1-	Sm149Di	pSTAT5	CD40L	MS5	M	Mouse	median	7.462437391
R35W9_MS5_Ms_M_CD40L.fcs	Mouse Basophils	Mouse Basophils	ms NK1.1-	Sm150Di	pS6	CD40L	MS5	M	Mouse	median	37.09525108
R35W9_MS5_Ms_M_CD40L.fcs	Mouse Basophils	Mouse Basophils	ms NK1.1-	Sm152Di	pErk1/2	CD40L	MS5	M	Mouse	median	14.19965839
R35W9_MS5_Ms_M_CD40L.fcs	Mouse Basophils	Mouse Basophils	ms NK1.1-	Sm154Di	pP38	CD40L	MS5	M	Mouse	median	6.455753326
R35W9_MS5_Ms_M_CD40L.fcs	Mouse Basophils	Mouse Basophils	ms NK1.1-	Gd160Di	pZap70/Syk	CD40L	MS5	M	Mouse	median	2.306519389
R35W9_MS5_Ms_M_CD40L.fcs	Mouse Basophils	Mouse Basophils	ms NK1.1-	Dy161Di	pTBK1	CD40L	MS5	M	Mouse	median	12.2414794
R35W9_MS5_Ms_M_CD40L.fcs	Mouse Basophils	Mouse Basophils	ms NK1.1-	Ho165Di	pSTAT6	CD40L	MS5	M	Mouse	median	19.20171547
R35W9_MS5_Ms_M_CD40L.fcs	Mouse Basophils	Mouse Basophils	ms NK1.1-	Er170Di	pSTAT4	CD40L	MS5	M	Mouse	median	4.564692974
R35W9_MS5_Ms_M_CD40L.fcs	Mouse Basophils	Mouse Basophils	ms NK1.1-	Yb172Di	p4E-BP1	CD40L	MS5	M	Mouse	median	8.467064857
R35W9_MS5_Ms_M_CD40L.fcs	Mouse Basophils	Mouse Basophils	ms NK1.1-	Tm169Di	Ki67	CD40L	MS5	M	Mouse	median	146.8328629
R35W9_MS5_Ms_M_CD40L.fcs	Mouse Basophils	Mouse Basophils	ms NK1.1-	Dy163Di	IkBa	CD40L	MS5	M	Mouse	median	38.21107101
R35W9_MS5_Ms_M_CD40L.fcs	ms NK1.1+/CD115-	ms NK1.1+/CD115-	CD19- CD3-	La139Di	pSTAT3	CD40L	MS5	M	Mouse	median	11.58308506
R35W9_MS5_Ms_M_CD40L.fcs	ms NK1.1+/CD115-	ms NK1.1+/CD115-	CD19- CD3-	Nd144Di	pMAPKAPK2	CD40L	MS5	M	Mouse	median	4.573169708
R35W9_MS5_Ms_M_CD40L.fcs	ms NK1.1+/CD115-	ms NK1.1+/CD115-	CD19- CD3-	Nd145Di	pCREB	CD40L	MS5	M	Mouse	median	20.63044548
R35W9_MS5_Ms_M_CD40L.fcs	ms NK1.1+/CD115-	ms NK1.1+/CD115-	CD19- CD3-	Nd146Di	pPLCg2	CD40L	MS5	M	Mouse	median	6.693683147
R35W9_MS5_Ms_M_CD40L.fcs	ms NK1.1+/CD115-	ms NK1.1+/CD115-	CD19- CD3-	Sm147Di	pSTAT1	CD40L	MS5	M	Mouse	median	1.927024961
R35W9_MS5_Ms_M_CD40L.fcs	ms NK1.1+/CD115-	ms NK1.1+/CD115-	CD19- CD3-	Sm149Di	pSTAT5	CD40L	MS5	M	Mouse	median	6.961136818
R35W9_MS5_Ms_M_CD40L.fcs	ms NK1.1+/CD115-	ms NK1.1+/CD115-	CD19- CD3-	Sm150Di	pS6	CD40L	MS5	M	Mouse	median	22.56567383
R35W9_MS5_Ms_M_CD40L.fcs	ms NK1.1+/CD115-	ms NK1.1+/CD115-	CD19- CD3-	Sm152Di	pErk1/2	CD40L	MS5	M	Mouse	median	6.733017445
R35W9_MS5_Ms_M_CD40L.fcs	ms NK1.1+/CD115-	ms NK1.1+/CD115-	CD19- CD3-	Sm154Di	pP38	CD40L	MS5	M	Mouse	median	3.185506821
R35W9_MS5_Ms_M_CD40L.fcs	ms NK1.1+/CD115-	ms NK1.1+/CD115-	CD19- CD3-	Gd160Di	pZap70/Syk	CD40L	MS5	M	Mouse	median	1.414197683
R35W9_MS5_Ms_M_CD40L.fcs	ms NK1.1+/CD115-	ms NK1.1+/CD115-	CD19- CD3-	Dy161Di	pTBK1	CD40L	MS5	M	Mouse	median	3.223734379
R35W9_MS5_Ms_M_CD40L.fcs	ms NK1.1+/CD115-	ms NK1.1+/CD115-	CD19- CD3-	Ho165Di	pSTAT6	CD40L	MS5	M	Mouse	median	9.131960869
R35W9_MS5_Ms_M_CD40L.fcs	ms NK1.1+/CD115-	ms NK1.1+/CD115-	CD19- CD3-	Er170Di	pSTAT4	CD40L	MS5	M	Mouse	median	4.700438976
R35W9_MS5_Ms_M_CD40L.fcs	ms NK1.1+/CD115-	ms NK1.1+/CD115-	CD19- CD3-	Yb172Di	p4E-BP1	CD40L	MS5	M	Mouse	median	5.892536163
R35W9_MS5_Ms_M_CD40L.fcs	ms NK1.1+/CD115-	ms NK1.1+/CD115-	CD19- CD3-	Tm169Di	Ki67	CD40L	MS5	M	Mouse	median	10.59974575
R35W9_MS5_Ms_M_CD40L.fcs	ms NK1.1+/CD115-	ms NK1.1+/CD115-	CD19- CD3-	Dy163Di	IkBa	CD40L	MS5	M	Mouse	median	16.76332855
R35W9_MS5_Ms_M_CD40L.fcs	Mouse pDCs	Mouse pDCs	FcεRIα-	La139Di	pSTAT3	CD40L	MS5	M	Mouse	median	37.04504395
R35W9_MS5_Ms_M_CD40L.fcs	Mouse pDCs	Mouse pDCs	FcεRIα-	Nd144Di	pMAPKAPK2	CD40L	MS5	M	Mouse	median	9.9187994
R35W9_MS5_Ms_M_CD40L.fcs	Mouse pDCs	Mouse pDCs	FcεRIα-	Nd145Di	pCREB	CD40L	MS5	M	Mouse	median	28.11323738
R35W9_MS5_Ms_M_CD40L.fcs	Mouse pDCs	Mouse pDCs	FcεRIα-	Nd146Di	pPLCg2	CD40L	MS5	M	Mouse	median	16.73816299
R35W9_MS5_Ms_M_CD40L.fcs	Mouse pDCs	Mouse pDCs	FcεRIα-	Sm147Di	pSTAT1	CD40L	MS5	M	Mouse	median	4.296003342
R35W9_MS5_Ms_M_CD40L.fcs	Mouse pDCs	Mouse pDCs	FcεRIα-	Sm149Di	pSTAT5	CD40L	MS5	M	Mouse	median	13.68921661
R35W9_MS5_Ms_M_CD40L.fcs	Mouse pDCs	Mouse pDCs	FcεRIα-	Sm150Di	pS6	CD40L	MS5	M	Mouse	median	60.6966095
R35W9_MS5_Ms_M_CD40L.fcs	Mouse pDCs	Mouse pDCs	FcεRIα-	Sm152Di	pErk1/2	CD40L	MS5	M	Mouse	median	12.43867111
R35W9_MS5_Ms_M_CD40L.fcs	Mouse pDCs	Mouse pDCs	FcεRIα-	Sm154Di	pP38	CD40L	MS5	M	Mouse	median	5.662894726
R35W9_MS5_Ms_M_CD40L.fcs	Mouse pDCs	Mouse pDCs	FcεRIα-	Gd160Di	pZap70/Syk	CD40L	MS5	M	Mouse	median	2.977107048
R35W9_MS5_Ms_M_CD40L.fcs	Mouse pDCs	Mouse pDCs	FcεRIα-	Dy161Di	pTBK1	CD40L	MS5	M	Mouse	median	3.848585606
R35W9_MS5_Ms_M_CD40L.fcs	Mouse pDCs	Mouse pDCs	FcεRIα-	Ho165Di	pSTAT6	CD40L	MS5	M	Mouse	median	21.66860008
R35W9_MS5_Ms_M_CD40L.fcs	Mouse pDCs	Mouse pDCs	FcεRIα-	Er170Di	pSTAT4	CD40L	MS5	M	Mouse	median	5.106421471
R35W9_MS5_Ms_M_CD40L.fcs	Mouse pDCs	Mouse pDCs	FcεRIα-	Yb172Di	p4E-BP1	CD40L	MS5	M	Mouse	median	9.05773735
R35W9_MS5_Ms_M_CD40L.fcs	Mouse pDCs	Mouse pDCs	FcεRIα-	Tm169Di	Ki67	CD40L	MS5	M	Mouse	median	11.02959824
R35W9_MS5_Ms_M_CD40L.fcs	Mouse pDCs	Mouse pDCs	FcεRIα-	Dy163Di	IkBa	CD40L	MS5	M	Mouse	median	12.98820972
R35W9_MS5_Ms_M_CD40L.fcs	Mouse Ly6C+	Mouse Ly6C+	ms CD115+/NK1.1-	La139Di	pSTAT3	CD40L	MS5	M	Mouse	median	25.54180908
R35W9_MS5_Ms_M_CD40L.fcs	Mouse Ly6C+	Mouse Ly6C+	ms CD115+/NK1.1-	Nd144Di	pMAPKAPK2	CD40L	MS5	M	Mouse	median	7.578498363
R35W9_MS5_Ms_M_CD40L.fcs	Mouse Ly6C+	Mouse Ly6C+	ms CD115+/NK1.1-	Nd145Di	pCREB	CD40L	MS5	M	Mouse	median	24.59593391
R35W9_MS5_Ms_M_CD40L.fcs	Mouse Ly6C+	Mouse Ly6C+	ms CD115+/NK1.1-	Nd146Di	pPLCg2	CD40L	MS5	M	Mouse	median	9.411997795
R35W9_MS5_Ms_M_CD40L.fcs	Mouse Ly6C+	Mouse Ly6C+	ms CD115+/NK1.1-	Sm147Di	pSTAT1	CD40L	MS5	M	Mouse	median	3.367290735
R35W9_MS5_Ms_M_CD40L.fcs	Mouse Ly6C+	Mouse Ly6C+	ms CD115+/NK1.1-	Sm149Di	pSTAT5	CD40L	MS5	M	Mouse	median	14.16312504
R35W9_MS5_Ms_M_CD40L.fcs	Mouse Ly6C+	Mouse Ly6C+	ms CD115+/NK1.1-	Sm150Di	pS6	CD40L	MS5	M	Mouse	median	71.18547821
R35W9_MS5_Ms_M_CD40L.fcs	Mouse Ly6C+	Mouse Ly6C+	ms CD115+/NK1.1-	Sm152Di	pErk1/2	CD40L	MS5	M	Mouse	median	11.03657436
R35W9_MS5_Ms_M_CD40L.fcs	Mouse Ly6C+	Mouse Ly6C+	ms CD115+/NK1.1-	Sm154Di	pP38	CD40L	MS5	M	Mouse	median	4.33867836
R35W9_MS5_Ms_M_CD40L.fcs	Mouse Ly6C+	Mouse Ly6C+	ms CD115+/NK1.1-	Gd160Di	pZap70/Syk	CD40L	MS5	M	Mouse	median	1.721198201
R35W9_MS5_Ms_M_CD40L.fcs	Mouse Ly6C+	Mouse Ly6C+	ms CD115+/NK1.1-	Dy161Di	pTBK1	CD40L	MS5	M	Mouse	median	5.013125896
R35W9_MS5_Ms_M_CD40L.fcs	Mouse Ly6C+	Mouse Ly6C+	ms CD115+/NK1.1-	Ho165Di	pSTAT6	CD40L	MS5	M	Mouse	median	11.4713974
R35W9_MS5_Ms_M_CD40L.fcs	Mouse Ly6C+	Mouse Ly6C+	ms CD115+/NK1.1-	Er170Di	pSTAT4	CD40L	MS5	M	Mouse	median	4.188073635
R35W9_MS5_Ms_M_CD40L.fcs	Mouse Ly6C+	Mouse Ly6C+	ms CD115+/NK1.1-	Yb172Di	p4E-BP1	CD40L	MS5	M	Mouse	median	17.14138603
R35W9_MS5_Ms_M_CD40L.fcs	Mouse Ly6C+	Mouse Ly6C+	ms CD115+/NK1.1-	Tm169Di	Ki67	CD40L	MS5	M	Mouse	median	115.9187698
R35W9_MS5_Ms_M_CD40L.fcs	Mouse Ly6C+	Mouse Ly6C+	ms CD115+/NK1.1-	Dy163Di	IkBa	CD40L	MS5	M	Mouse	median	31.60748482
R35W9_MS5_Ms_M_CD40L.fcs	Mouse Ly6C-	Mouse Ly6C-	ms CD115+/NK1.1-	La139Di	pSTAT3	CD40L	MS5	M	Mouse	median	17.58472347
R35W9_MS5_Ms_M_CD40L.fcs	Mouse Ly6C-	Mouse Ly6C-	ms CD115+/NK1.1-	Nd144Di	pMAPKAPK2	CD40L	MS5	M	Mouse	median	6.892549992
R35W9_MS5_Ms_M_CD40L.fcs	Mouse Ly6C-	Mouse Ly6C-	ms CD115+/NK1.1-	Nd145Di	pCREB	CD40L	MS5	M	Mouse	median	32.38484001
R35W9_MS5_Ms_M_CD40L.fcs	Mouse Ly6C-	Mouse Ly6C-	ms CD115+/NK1.1-	Nd146Di	pPLCg2	CD40L	MS5	M	Mouse	median	16.35263443
R35W9_MS5_Ms_M_CD40L.fcs	Mouse Ly6C-	Mouse Ly6C-	ms CD115+/NK1.1-	Sm147Di	pSTAT1	CD40L	MS5	M	Mouse	median	2.57798779
R35W9_MS5_Ms_M_CD40L.fcs	Mouse Ly6C-	Mouse Ly6C-	ms CD115+/NK1.1-	Sm149Di	pSTAT5	CD40L	MS5	M	Mouse	median	11.16331959
R35W9_MS5_Ms_M_CD40L.fcs	Mouse Ly6C-	Mouse Ly6C-	ms CD115+/NK1.1-	Sm150Di	pS6	CD40L	MS5	M	Mouse	median	50.39695549
R35W9_MS5_Ms_M_CD40L.fcs	Mouse Ly6C-	Mouse Ly6C-	ms CD115+/NK1.1-	Sm152Di	pErk1/2	CD40L	MS5	M	Mouse	median	9.087444305
R35W9_MS5_Ms_M_CD40L.fcs	Mouse Ly6C-	Mouse Ly6C-	ms CD115+/NK1.1-	Sm154Di	pP38	CD40L	MS5	M	Mouse	median	4.735199928
R35W9_MS5_Ms_M_CD40L.fcs	Mouse Ly6C-	Mouse Ly6C-	ms CD115+/NK1.1-	Gd160Di	pZap70/Syk	CD40L	MS5	M	Mouse	median	2.47374332
R35W9_MS5_Ms_M_CD40L.fcs	Mouse Ly6C-	Mouse Ly6C-	ms CD115+/NK1.1-	Dy161Di	pTBK1	CD40L	MS5	M	Mouse	median	6.182672501
R35W9_MS5_Ms_M_CD40L.fcs	Mouse Ly6C-	Mouse Ly6C-	ms CD115+/NK1.1-	Ho165Di	pSTAT6	CD40L	MS5	M	Mouse	median	11.17623186
R35W9_MS5_Ms_M_CD40L.fcs	Mouse Ly6C-	Mouse Ly6C-	ms CD115+/NK1.1-	Er170Di	pSTAT4	CD40L	MS5	M	Mouse	median	5.109443665
R35W9_MS5_Ms_M_CD40L.fcs	Mouse Ly6C-	Mouse Ly6C-	ms CD115+/NK1.1-	Yb172Di	p4E-BP1	CD40L	MS5	M	Mouse	median	14.65761709
R35W9_MS5_Ms_M_CD40L.fcs	Mouse Ly6C-	Mouse Ly6C-	ms CD115+/NK1.1-	Tm169Di	Ki67	CD40L	MS5	M	Mouse	median	14.77042294
R35W9_MS5_Ms_M_CD40L.fcs	Mouse Ly6C-	Mouse Ly6C-	ms CD115+/NK1.1-	Dy163Di	IkBa	CD40L	MS5	M	Mouse	median	34.92070961
R35W9_MS5_Ms_M_CD40L.fcs	CD8+T cells	CD8+T cells	T Cells	La139Di	pSTAT3	CD40L	MS5	M	Mouse	median	16.18000031
R35W9_MS5_Ms_M_CD40L.fcs	CD8+T cells	CD8+T cells	T Cells	Nd144Di	pMAPKAPK2	CD40L	MS5	M	Mouse	median	6.019781113
R35W9_MS5_Ms_M_CD40L.fcs	CD8+T cells	CD8+T cells	T Cells	Nd145Di	pCREB	CD40L	MS5	M	Mouse	median	30.26292419
R35W9_MS5_Ms_M_CD40L.fcs	CD8+T cells	CD8+T cells	T Cells	Nd146Di	pPLCg2	CD40L	MS5	M	Mouse	median	8.632858276
R35W9_MS5_Ms_M_CD40L.fcs	CD8+T cells	CD8+T cells	T Cells	Sm147Di	pSTAT1	CD40L	MS5	M	Mouse	median	2.042117119
R35W9_MS5_Ms_M_CD40L.fcs	CD8+T cells	CD8+T cells	T Cells	Sm149Di	pSTAT5	CD40L	MS5	M	Mouse	median	12.81400585
R35W9_MS5_Ms_M_CD40L.fcs	CD8+T cells	CD8+T cells	T Cells	Sm150Di	pS6	CD40L	MS5	M	Mouse	median	39.10628128
R35W9_MS5_Ms_M_CD40L.fcs	CD8+T cells	CD8+T cells	T Cells	Sm152Di	pErk1/2	CD40L	MS5	M	Mouse	median	10.32277775
R35W9_MS5_Ms_M_CD40L.fcs	CD8+T cells	CD8+T cells	T Cells	Sm154Di	pP38	CD40L	MS5	M	Mouse	median	5.360371113
R35W9_MS5_Ms_M_CD40L.fcs	CD8+T cells	CD8+T cells	T Cells	Gd160Di	pZap70/Syk	CD40L	MS5	M	Mouse	median	2.755485296
R35W9_MS5_Ms_M_CD40L.fcs	CD8+T cells	CD8+T cells	T Cells	Dy161Di	pTBK1	CD40L	MS5	M	Mouse	median	2.85717988
R35W9_MS5_Ms_M_CD40L.fcs	CD8+T cells	CD8+T cells	T Cells	Ho165Di	pSTAT6	CD40L	MS5	M	Mouse	median	10.17879391
R35W9_MS5_Ms_M_CD40L.fcs	CD8+T cells	CD8+T cells	T Cells	Er170Di	pSTAT4	CD40L	MS5	M	Mouse	median	3.956417561
R35W9_MS5_Ms_M_CD40L.fcs	CD8+T cells	CD8+T cells	T Cells	Yb172Di	p4E-BP1	CD40L	MS5	M	Mouse	median	5.340997219
R35W9_MS5_Ms_M_CD40L.fcs	CD8+T cells	CD8+T cells	T Cells	Tm169Di	Ki67	CD40L	MS5	M	Mouse	median	8.968572617
R35W9_MS5_Ms_M_CD40L.fcs	CD8+T cells	CD8+T cells	T Cells	Dy163Di	IkBa	CD40L	MS5	M	Mouse	median	17.88056564
R35W9_MS5_Ms_M_CD40L.fcs	CD4+T cells	CD4+T cells	T Cells	La139Di	pSTAT3	CD40L	MS5	M	Mouse	median	15.48018503
R35W9_MS5_Ms_M_CD40L.fcs	CD4+T cells	CD4+T cells	T Cells	Nd144Di	pMAPKAPK2	CD40L	MS5	M	Mouse	median	6.077706337
R35W9_MS5_Ms_M_CD40L.fcs	CD4+T cells	CD4+T cells	T Cells	Nd145Di	pCREB	CD40L	MS5	M	Mouse	median	38.00151062
R35W9_MS5_Ms_M_CD40L.fcs	CD4+T cells	CD4+T cells	T Cells	Nd146Di	pPLCg2	CD40L	MS5	M	Mouse	median	6.996803761
R35W9_MS5_Ms_M_CD40L.fcs	CD4+T cells	CD4+T cells	T Cells	Sm147Di	pSTAT1	CD40L	MS5	M	Mouse	median	1.936164021
R35W9_MS5_Ms_M_CD40L.fcs	CD4+T cells	CD4+T cells	T Cells	Sm149Di	pSTAT5	CD40L	MS5	M	Mouse	median	10.05044937
R35W9_MS5_Ms_M_CD40L.fcs	CD4+T cells	CD4+T cells	T Cells	Sm150Di	pS6	CD40L	MS5	M	Mouse	median	35.23293495
R35W9_MS5_Ms_M_CD40L.fcs	CD4+T cells	CD4+T cells	T Cells	Sm152Di	pErk1/2	CD40L	MS5	M	Mouse	median	10.28980112
R35W9_MS5_Ms_M_CD40L.fcs	CD4+T cells	CD4+T cells	T Cells	Sm154Di	pP38	CD40L	MS5	M	Mouse	median	4.445717335
R35W9_MS5_Ms_M_CD40L.fcs	CD4+T cells	CD4+T cells	T Cells	Gd160Di	pZap70/Syk	CD40L	MS5	M	Mouse	median	2.759044051
R35W9_MS5_Ms_M_CD40L.fcs	CD4+T cells	CD4+T cells	T Cells	Dy161Di	pTBK1	CD40L	MS5	M	Mouse	median	2.492932081
R35W9_MS5_Ms_M_CD40L.fcs	CD4+T cells	CD4+T cells	T Cells	Ho165Di	pSTAT6	CD40L	MS5	M	Mouse	median	10.00944138
R35W9_MS5_Ms_M_CD40L.fcs	CD4+T cells	CD4+T cells	T Cells	Er170Di	pSTAT4	CD40L	MS5	M	Mouse	median	3.317957878
R35W9_MS5_Ms_M_CD40L.fcs	CD4+T cells	CD4+T cells	T Cells	Yb172Di	p4E-BP1	CD40L	MS5	M	Mouse	median	6.829707384
R35W9_MS5_Ms_M_CD40L.fcs	CD4+T cells	CD4+T cells	T Cells	Tm169Di	Ki67	CD40L	MS5	M	Mouse	median	8.417726994
R35W9_MS5_Ms_M_CD40L.fcs	CD4+T cells	CD4+T cells	T Cells	Dy163Di	IkBa	CD40L	MS5	M	Mouse	median	17.7088871
R35W9_MS5_Ms_M_CD40L.fcs	CD4+/CD8+	CD4+/CD8+	T Cells	La139Di	pSTAT3	CD40L	MS5	M	Mouse	median	29.64507866
R35W9_MS5_Ms_M_CD40L.fcs	CD4+/CD8+	CD4+/CD8+	T Cells	Nd144Di	pMAPKAPK2	CD40L	MS5	M	Mouse	median	10.65044975
R35W9_MS5_Ms_M_CD40L.fcs	CD4+/CD8+	CD4+/CD8+	T Cells	Nd145Di	pCREB	CD40L	MS5	M	Mouse	median	52.48715973
R35W9_MS5_Ms_M_CD40L.fcs	CD4+/CD8+	CD4+/CD8+	T Cells	Nd146Di	pPLCg2	CD40L	MS5	M	Mouse	median	14.42301178
R35W9_MS5_Ms_M_CD40L.fcs	CD4+/CD8+	CD4+/CD8+	T Cells	Sm147Di	pSTAT1	CD40L	MS5	M	Mouse	median	3.42769742
R35W9_MS5_Ms_M_CD40L.fcs	CD4+/CD8+	CD4+/CD8+	T Cells	Sm149Di	pSTAT5	CD40L	MS5	M	Mouse	median	15.30652809
R35W9_MS5_Ms_M_CD40L.fcs	CD4+/CD8+	CD4+/CD8+	T Cells	Sm150Di	pS6	CD40L	MS5	M	Mouse	median	67.82318878
R35W9_MS5_Ms_M_CD40L.fcs	CD4+/CD8+	CD4+/CD8+	T Cells	Sm152Di	pErk1/2	CD40L	MS5	M	Mouse	median	18.57076454
R35W9_MS5_Ms_M_CD40L.fcs	CD4+/CD8+	CD4+/CD8+	T Cells	Sm154Di	pP38	CD40L	MS5	M	Mouse	median	8.00839901
R35W9_MS5_Ms_M_CD40L.fcs	CD4+/CD8+	CD4+/CD8+	T Cells	Gd160Di	pZap70/Syk	CD40L	MS5	M	Mouse	median	3.884179354
R35W9_MS5_Ms_M_CD40L.fcs	CD4+/CD8+	CD4+/CD8+	T Cells	Dy161Di	pTBK1	CD40L	MS5	M	Mouse	median	3.509348392
R35W9_MS5_Ms_M_CD40L.fcs	CD4+/CD8+	CD4+/CD8+	T Cells	Ho165Di	pSTAT6	CD40L	MS5	M	Mouse	median	18.57214355
R35W9_MS5_Ms_M_CD40L.fcs	CD4+/CD8+	CD4+/CD8+	T Cells	Er170Di	pSTAT4	CD40L	MS5	M	Mouse	median	4.71203804
R35W9_MS5_Ms_M_CD40L.fcs	CD4+/CD8+	CD4+/CD8+	T Cells	Yb172Di	p4E-BP1	CD40L	MS5	M	Mouse	median	8.492827415
R35W9_MS5_Ms_M_CD40L.fcs	CD4+/CD8+	CD4+/CD8+	T Cells	Tm169Di	Ki67	CD40L	MS5	M	Mouse	median	11.82515049
R35W9_MS5_Ms_M_CD40L.fcs	CD4+/CD8+	CD4+/CD8+	T Cells	Dy163Di	IkBa	CD40L	MS5	M	Mouse	median	21.6358757
R35W9_MS5_Ms_M_PMAIono.fcs	Neutrophils	Neutrophils	Non-Basophils	La139Di	pSTAT3	PMAIono	MS5	M	Mouse	median	42.84316635
R35W9_MS5_Ms_M_PMAIono.fcs	Neutrophils	Neutrophils	Non-Basophils	Nd144Di	pMAPKAPK2	PMAIono	MS5	M	Mouse	median	16.76462173
R35W9_MS5_Ms_M_PMAIono.fcs	Neutrophils	Neutrophils	Non-Basophils	Nd145Di	pCREB	PMAIono	MS5	M	Mouse	median	43.24471283
R35W9_MS5_Ms_M_PMAIono.fcs	Neutrophils	Neutrophils	Non-Basophils	Nd146Di	pPLCg2	PMAIono	MS5	M	Mouse	median	8.740667343
R35W9_MS5_Ms_M_PMAIono.fcs	Neutrophils	Neutrophils	Non-Basophils	Sm147Di	pSTAT1	PMAIono	MS5	M	Mouse	median	4.575228691
R35W9_MS5_Ms_M_PMAIono.fcs	Neutrophils	Neutrophils	Non-Basophils	Sm149Di	pSTAT5	PMAIono	MS5	M	Mouse	median	7.706742764
R35W9_MS5_Ms_M_PMAIono.fcs	Neutrophils	Neutrophils	Non-Basophils	Sm150Di	pS6	PMAIono	MS5	M	Mouse	median	60.94900131
R35W9_MS5_Ms_M_PMAIono.fcs	Neutrophils	Neutrophils	Non-Basophils	Sm152Di	pErk1/2	PMAIono	MS5	M	Mouse	median	24.3749485
R35W9_MS5_Ms_M_PMAIono.fcs	Neutrophils	Neutrophils	Non-Basophils	Sm154Di	pP38	PMAIono	MS5	M	Mouse	median	5.848901749
R35W9_MS5_Ms_M_PMAIono.fcs	Neutrophils	Neutrophils	Non-Basophils	Gd160Di	pZap70/Syk	PMAIono	MS5	M	Mouse	median	4.328625679
R35W9_MS5_Ms_M_PMAIono.fcs	Neutrophils	Neutrophils	Non-Basophils	Dy161Di	pTBK1	PMAIono	MS5	M	Mouse	median	2.280773401
R35W9_MS5_Ms_M_PMAIono.fcs	Neutrophils	Neutrophils	Non-Basophils	Ho165Di	pSTAT6	PMAIono	MS5	M	Mouse	median	4.212007999
R35W9_MS5_Ms_M_PMAIono.fcs	Neutrophils	Neutrophils	Non-Basophils	Er170Di	pSTAT4	PMAIono	MS5	M	Mouse	median	2.706289053
R35W9_MS5_Ms_M_PMAIono.fcs	Neutrophils	Neutrophils	Non-Basophils	Yb172Di	p4E-BP1	PMAIono	MS5	M	Mouse	median	5.322705269
R35W9_MS5_Ms_M_PMAIono.fcs	Neutrophils	Neutrophils	Non-Basophils	Tm169Di	Ki67	PMAIono	MS5	M	Mouse	median	48.64518356
R35W9_MS5_Ms_M_PMAIono.fcs	Neutrophils	Neutrophils	Non-Basophils	Dy163Di	IkBa	PMAIono	MS5	M	Mouse	median	3.636960983
R35W9_MS5_Ms_M_PMAIono.fcs	B Cells	B Cells	CD45+ CD66-	La139Di	pSTAT3	PMAIono	MS5	M	Mouse	median	21.475214
R35W9_MS5_Ms_M_PMAIono.fcs	B Cells	B Cells	CD45+ CD66-	Nd144Di	pMAPKAPK2	PMAIono	MS5	M	Mouse	median	5.499409676
R35W9_MS5_Ms_M_PMAIono.fcs	B Cells	B Cells	CD45+ CD66-	Nd145Di	pCREB	PMAIono	MS5	M	Mouse	median	32.72109604
R35W9_MS5_Ms_M_PMAIono.fcs	B Cells	B Cells	CD45+ CD66-	Nd146Di	pPLCg2	PMAIono	MS5	M	Mouse	median	7.679986954
R35W9_MS5_Ms_M_PMAIono.fcs	B Cells	B Cells	CD45+ CD66-	Sm147Di	pSTAT1	PMAIono	MS5	M	Mouse	median	5.676795959
R35W9_MS5_Ms_M_PMAIono.fcs	B Cells	B Cells	CD45+ CD66-	Sm149Di	pSTAT5	PMAIono	MS5	M	Mouse	median	6.387733459
R35W9_MS5_Ms_M_PMAIono.fcs	B Cells	B Cells	CD45+ CD66-	Sm150Di	pS6	PMAIono	MS5	M	Mouse	median	30.70858574
R35W9_MS5_Ms_M_PMAIono.fcs	B Cells	B Cells	CD45+ CD66-	Sm152Di	pErk1/2	PMAIono	MS5	M	Mouse	median	7.511656761
R35W9_MS5_Ms_M_PMAIono.fcs	B Cells	B Cells	CD45+ CD66-	Sm154Di	pP38	PMAIono	MS5	M	Mouse	median	3.398205519
R35W9_MS5_Ms_M_PMAIono.fcs	B Cells	B Cells	CD45+ CD66-	Gd160Di	pZap70/Syk	PMAIono	MS5	M	Mouse	median	2.222985029
R35W9_MS5_Ms_M_PMAIono.fcs	B Cells	B Cells	CD45+ CD66-	Dy161Di	pTBK1	PMAIono	MS5	M	Mouse	median	4.667029381
R35W9_MS5_Ms_M_PMAIono.fcs	B Cells	B Cells	CD45+ CD66-	Ho165Di	pSTAT6	PMAIono	MS5	M	Mouse	median	8.925943375
R35W9_MS5_Ms_M_PMAIono.fcs	B Cells	B Cells	CD45+ CD66-	Er170Di	pSTAT4	PMAIono	MS5	M	Mouse	median	4.075568676
R35W9_MS5_Ms_M_PMAIono.fcs	B Cells	B Cells	CD45+ CD66-	Yb172Di	p4E-BP1	PMAIono	MS5	M	Mouse	median	11.28915596
R35W9_MS5_Ms_M_PMAIono.fcs	B Cells	B Cells	CD45+ CD66-	Tm169Di	Ki67	PMAIono	MS5	M	Mouse	median	8.851823807
R35W9_MS5_Ms_M_PMAIono.fcs	B Cells	B Cells	CD45+ CD66-	Dy163Di	IkBa	PMAIono	MS5	M	Mouse	median	22.42597389
R35W9_MS5_Ms_M_PMAIono.fcs	Mouse Basophils	Mouse Basophils	ms NK1.1-	La139Di	pSTAT3	PMAIono	MS5	M	Mouse	median	17.3388195
R35W9_MS5_Ms_M_PMAIono.fcs	Mouse Basophils	Mouse Basophils	ms NK1.1-	Nd144Di	pMAPKAPK2	PMAIono	MS5	M	Mouse	median	10.47560215
R35W9_MS5_Ms_M_PMAIono.fcs	Mouse Basophils	Mouse Basophils	ms NK1.1-	Nd145Di	pCREB	PMAIono	MS5	M	Mouse	median	36.52584076
R35W9_MS5_Ms_M_PMAIono.fcs	Mouse Basophils	Mouse Basophils	ms NK1.1-	Nd146Di	pPLCg2	PMAIono	MS5	M	Mouse	median	6.685162544
R35W9_MS5_Ms_M_PMAIono.fcs	Mouse Basophils	Mouse Basophils	ms NK1.1-	Sm147Di	pSTAT1	PMAIono	MS5	M	Mouse	median	2.297511816
R35W9_MS5_Ms_M_PMAIono.fcs	Mouse Basophils	Mouse Basophils	ms NK1.1-	Sm149Di	pSTAT5	PMAIono	MS5	M	Mouse	median	5.894563198
R35W9_MS5_Ms_M_PMAIono.fcs	Mouse Basophils	Mouse Basophils	ms NK1.1-	Sm150Di	pS6	PMAIono	MS5	M	Mouse	median	33.38425064
R35W9_MS5_Ms_M_PMAIono.fcs	Mouse Basophils	Mouse Basophils	ms NK1.1-	Sm152Di	pErk1/2	PMAIono	MS5	M	Mouse	median	12.19204617
R35W9_MS5_Ms_M_PMAIono.fcs	Mouse Basophils	Mouse Basophils	ms NK1.1-	Sm154Di	pP38	PMAIono	MS5	M	Mouse	median	6.547335148
R35W9_MS5_Ms_M_PMAIono.fcs	Mouse Basophils	Mouse Basophils	ms NK1.1-	Gd160Di	pZap70/Syk	PMAIono	MS5	M	Mouse	median	1.896575451
R35W9_MS5_Ms_M_PMAIono.fcs	Mouse Basophils	Mouse Basophils	ms NK1.1-	Dy161Di	pTBK1	PMAIono	MS5	M	Mouse	median	11.52603912
R35W9_MS5_Ms_M_PMAIono.fcs	Mouse Basophils	Mouse Basophils	ms NK1.1-	Ho165Di	pSTAT6	PMAIono	MS5	M	Mouse	median	13.88394737
R35W9_MS5_Ms_M_PMAIono.fcs	Mouse Basophils	Mouse Basophils	ms NK1.1-	Er170Di	pSTAT4	PMAIono	MS5	M	Mouse	median	3.69641161
R35W9_MS5_Ms_M_PMAIono.fcs	Mouse Basophils	Mouse Basophils	ms NK1.1-	Yb172Di	p4E-BP1	PMAIono	MS5	M	Mouse	median	6.36792469
R35W9_MS5_Ms_M_PMAIono.fcs	Mouse Basophils	Mouse Basophils	ms NK1.1-	Tm169Di	Ki67	PMAIono	MS5	M	Mouse	median	99.0504837
R35W9_MS5_Ms_M_PMAIono.fcs	Mouse Basophils	Mouse Basophils	ms NK1.1-	Dy163Di	IkBa	PMAIono	MS5	M	Mouse	median	37.44207764
R35W9_MS5_Ms_M_PMAIono.fcs	ms NK1.1+/CD115-	ms NK1.1+/CD115-	CD19- CD3-	La139Di	pSTAT3	PMAIono	MS5	M	Mouse	median	11.60518265
R35W9_MS5_Ms_M_PMAIono.fcs	ms NK1.1+/CD115-	ms NK1.1+/CD115-	CD19- CD3-	Nd144Di	pMAPKAPK2	PMAIono	MS5	M	Mouse	median	4.551377296
R35W9_MS5_Ms_M_PMAIono.fcs	ms NK1.1+/CD115-	ms NK1.1+/CD115-	CD19- CD3-	Nd145Di	pCREB	PMAIono	MS5	M	Mouse	median	23.78659344
R35W9_MS5_Ms_M_PMAIono.fcs	ms NK1.1+/CD115-	ms NK1.1+/CD115-	CD19- CD3-	Nd146Di	pPLCg2	PMAIono	MS5	M	Mouse	median	6.496141195
R35W9_MS5_Ms_M_PMAIono.fcs	ms NK1.1+/CD115-	ms NK1.1+/CD115-	CD19- CD3-	Sm147Di	pSTAT1	PMAIono	MS5	M	Mouse	median	1.939059496
R35W9_MS5_Ms_M_PMAIono.fcs	ms NK1.1+/CD115-	ms NK1.1+/CD115-	CD19- CD3-	Sm149Di	pSTAT5	PMAIono	MS5	M	Mouse	median	6.653917789
R35W9_MS5_Ms_M_PMAIono.fcs	ms NK1.1+/CD115-	ms NK1.1+/CD115-	CD19- CD3-	Sm150Di	pS6	PMAIono	MS5	M	Mouse	median	22.97866917
R35W9_MS5_Ms_M_PMAIono.fcs	ms NK1.1+/CD115-	ms NK1.1+/CD115-	CD19- CD3-	Sm152Di	pErk1/2	PMAIono	MS5	M	Mouse	median	6.865719557
R35W9_MS5_Ms_M_PMAIono.fcs	ms NK1.1+/CD115-	ms NK1.1+/CD115-	CD19- CD3-	Sm154Di	pP38	PMAIono	MS5	M	Mouse	median	3.113438249
R35W9_MS5_Ms_M_PMAIono.fcs	ms NK1.1+/CD115-	ms NK1.1+/CD115-	CD19- CD3-	Gd160Di	pZap70/Syk	PMAIono	MS5	M	Mouse	median	1.536391854
R35W9_MS5_Ms_M_PMAIono.fcs	ms NK1.1+/CD115-	ms NK1.1+/CD115-	CD19- CD3-	Dy161Di	pTBK1	PMAIono	MS5	M	Mouse	median	3.348067284
R35W9_MS5_Ms_M_PMAIono.fcs	ms NK1.1+/CD115-	ms NK1.1+/CD115-	CD19- CD3-	Ho165Di	pSTAT6	PMAIono	MS5	M	Mouse	median	9.643507004
R35W9_MS5_Ms_M_PMAIono.fcs	ms NK1.1+/CD115-	ms NK1.1+/CD115-	CD19- CD3-	Er170Di	pSTAT4	PMAIono	MS5	M	Mouse	median	4.705751896
R35W9_MS5_Ms_M_PMAIono.fcs	ms NK1.1+/CD115-	ms NK1.1+/CD115-	CD19- CD3-	Yb172Di	p4E-BP1	PMAIono	MS5	M	Mouse	median	5.740692139
R35W9_MS5_Ms_M_PMAIono.fcs	ms NK1.1+/CD115-	ms NK1.1+/CD115-	CD19- CD3-	Tm169Di	Ki67	PMAIono	MS5	M	Mouse	median	10.87175751
R35W9_MS5_Ms_M_PMAIono.fcs	ms NK1.1+/CD115-	ms NK1.1+/CD115-	CD19- CD3-	Dy163Di	IkBa	PMAIono	MS5	M	Mouse	median	16.1480341
R35W9_MS5_Ms_M_PMAIono.fcs	Mouse pDCs	Mouse pDCs	FcεRIα-	La139Di	pSTAT3	PMAIono	MS5	M	Mouse	median	37.91546631
R35W9_MS5_Ms_M_PMAIono.fcs	Mouse pDCs	Mouse pDCs	FcεRIα-	Nd144Di	pMAPKAPK2	PMAIono	MS5	M	Mouse	median	8.991522789
R35W9_MS5_Ms_M_PMAIono.fcs	Mouse pDCs	Mouse pDCs	FcεRIα-	Nd145Di	pCREB	PMAIono	MS5	M	Mouse	median	28.22801781
R35W9_MS5_Ms_M_PMAIono.fcs	Mouse pDCs	Mouse pDCs	FcεRIα-	Nd146Di	pPLCg2	PMAIono	MS5	M	Mouse	median	16.067976
R35W9_MS5_Ms_M_PMAIono.fcs	Mouse pDCs	Mouse pDCs	FcεRIα-	Sm147Di	pSTAT1	PMAIono	MS5	M	Mouse	median	5.074225903
R35W9_MS5_Ms_M_PMAIono.fcs	Mouse pDCs	Mouse pDCs	FcεRIα-	Sm149Di	pSTAT5	PMAIono	MS5	M	Mouse	median	9.620488167
R35W9_MS5_Ms_M_PMAIono.fcs	Mouse pDCs	Mouse pDCs	FcεRIα-	Sm150Di	pS6	PMAIono	MS5	M	Mouse	median	53.51948547
R35W9_MS5_Ms_M_PMAIono.fcs	Mouse pDCs	Mouse pDCs	FcεRIα-	Sm152Di	pErk1/2	PMAIono	MS5	M	Mouse	median	13.55805588
R35W9_MS5_Ms_M_PMAIono.fcs	Mouse pDCs	Mouse pDCs	FcεRIα-	Sm154Di	pP38	PMAIono	MS5	M	Mouse	median	4.226155758
R35W9_MS5_Ms_M_PMAIono.fcs	Mouse pDCs	Mouse pDCs	FcεRIα-	Gd160Di	pZap70/Syk	PMAIono	MS5	M	Mouse	median	3.053912401
R35W9_MS5_Ms_M_PMAIono.fcs	Mouse pDCs	Mouse pDCs	FcεRIα-	Dy161Di	pTBK1	PMAIono	MS5	M	Mouse	median	2.735155821
R35W9_MS5_Ms_M_PMAIono.fcs	Mouse pDCs	Mouse pDCs	FcεRIα-	Ho165Di	pSTAT6	PMAIono	MS5	M	Mouse	median	23.42610168
R35W9_MS5_Ms_M_PMAIono.fcs	Mouse pDCs	Mouse pDCs	FcεRIα-	Er170Di	pSTAT4	PMAIono	MS5	M	Mouse	median	4.637434483
R35W9_MS5_Ms_M_PMAIono.fcs	Mouse pDCs	Mouse pDCs	FcεRIα-	Yb172Di	p4E-BP1	PMAIono	MS5	M	Mouse	median	7.294046879
[truncated: 10,642 more rows]
